# Supplementary material for: Deforestation and Carbon Stock Loss in Brazil’s Amazonian Settlements
Source: Springer Nature journal article supplement (doi:10.1007/s00267-016-0783-2), 2016-10-24
Supplement: MOESM1 [file 10965438]

## Deforestation and carbon stock loss in Brazil's Amazonian settlements

Aurora Miho Yanai<sup>1</sup>, Euler Melo Nogueira<sup>1</sup>, Paulo Maurício de Alencastro Graça<sup>1,2</sup>, Philip Martin Fearnside<sup>1,2,3</sup>

<sup>1</sup>Department of Environmental Dynamics, National Institute for Research in Amazonia (INPA), Av. André Araújo nº 2936, CEP 69067-375, Manaus, Amazonas, Brazil.

<sup>2</sup>Brazilian Research Network on Climate Change (RedeClima)

<sup>3</sup>Corresponding author

**Table S1** Total number of settlements analyzed by state in comparison with INCRA data. .... p. 2

**Table S2** Overlapping areas (km<sup>2</sup>) between the carbon map hydrography and PRODES and PMDBBS classes. .... p. 2

**Table S3** Overlapping areas (km<sup>2</sup>) between PRODES classes and urban areas (carbon map). .... p. 2

**Table S4** Area (km<sup>2</sup>) and carbon stock (Pg) by vegetation type in relation to land-cover classes. .... p. 3

**Table S5** Areas of land cover classes and the corresponding carbon for each settlement analyzed. Total deforestation represents the PRODES (~2013) + PMDBBS (~ 2010) data..... p. 5

**Table S6** Estimates of area of forest and of clearing (km<sup>2</sup> and %) through the year of official creation of each settlement and in the period after creation (from one year after creation to 2005 and from 2006 or one year after creation to 2013) in 950 settlements created between 2000 and 2008 ..... p. 108

**Table S7** Total area originally forested and area of forest remaining in the year of official creation of each settlement and in two different years (2005 and 2013) and the annual mean area cleared in two periods in Federal Settlement Projects (PA), Sustainable Development Projects (PDS) and Agro-Extractivist Settlement Projects (PAE) created from 2000 to 2008 (total = 899 settlements). .... p. 160

**Table S1** Total number of settlements analyzed by state in comparison with INCRA data.

| States in Legal Amazonia | Total of settlements (Brazil, INCRA 2015b)* | Settlements analyzed in current study | % of settlements analyzed |
|--------------------------|---------------------------------------------|---------------------------------------|---------------------------|
| Acre                     | 143                                         | 131                                   | 92%                       |
| Amapá                    | 49                                          | 36                                    | 73%                       |
| Amazonas                 | 110                                         | 109                                   | 99%                       |
| Maranhão                 | 796                                         | 510                                   | 64%                       |
| Mato Grosso              | 541                                         | 396                                   | 73%                       |
| Pará                     | 1090                                        | 1004                                  | 92%                       |
| Rondônia                 | 195                                         | 169                                   | 87%                       |
| Roraima                  | 67                                          | 48                                    | 72%                       |
| Tocantins                | 361                                         | 337                                   | 93%                       |
| Total                    | 3352                                        | 2740                                  | 82%                       |

\*Based on INCRA data available online <<http://painel.incra.gov.br/sistemas/index.php>>. Accessed 7 May 2015.

**Table S2** Overlapping areas (km<sup>2</sup>) between the carbon map hydrography and PRODES and PMDBBS classes.

| Class                               | Overlapping areas with carbon map hydrography | Initial area updated |
|-------------------------------------|-----------------------------------------------|----------------------|
| Deforestation through 2013 (PRODES) | 417.7 (0%)                                    | 152,802.3            |
| Deforestation through 2010 (PMDBBS) | 7.5 (0%)                                      | 8,081.1              |
| Forest (2013)                       | 774.5 (0%)                                    | 162,097.7            |
| Non-forest                          | 935.9 (3%)                                    | 27,783.0             |
| Clouds (2013)                       | 199.3 (0%)                                    | 42,498.5             |
| Total                               | 2,335.1 (1%)                                  | 393,262.6            |

**Table S3** Overlapping areas (km<sup>2</sup>) between PRODES classes and urban areas (carbon map).

| PRODES class               | Overlapping with urban areas | PRODES total area updated without urban areas |
|----------------------------|------------------------------|-----------------------------------------------|
| Deforestation through 1997 | 49.9                         | 77,735.6                                      |
| Deforestation in 2000      | 0.3                          | 15,746.8                                      |
| Deforestation in 2001      | 0.2                          | 11,823.2                                      |
| Deforestation in 2004      | 0.02                         | 6,635.2                                       |
| Forest (2013)              | 0.02                         | 161,323.1                                     |
| Non-forest                 | 0.04                         | 26,847.1                                      |
| Total                      | 50.5                         | 300,111.0                                     |

**Table S4** Area (km<sup>2</sup>) and carbon stock (Pg) by vegetation type in relation to land-cover classes.

| Vegetation type<br>(carbon map) <sup>1</sup>                                             |                                                                                                                  | PRODES (~2013)                                                    |                |                     |                |                         |               | PMDBBS (~2010)             |                |                                       |               |
|------------------------------------------------------------------------------------------|------------------------------------------------------------------------------------------------------------------|-------------------------------------------------------------------|----------------|---------------------|----------------|-------------------------|---------------|----------------------------|----------------|---------------------------------------|---------------|
|                                                                                          |                                                                                                                  | Deforestation through<br>2013                                     |                | Forest in 2013      |                | Non-Forest <sup>2</sup> |               | Areas covered by<br>clouds |                | Clearing through<br>2010 <sup>3</sup> |               |
|                                                                                          |                                                                                                                  | Area                                                              | Carbon         | Area                | Carbon         | Area                    | Carbon        | Area                       | Carbon         | Area                                  | Carbon        |
| Vegetation types classified as forest by<br>PRODES in accord with Brazil, IBGE<br>(1992) | Forested <i>campinarana</i><br>[ <i>Campinarana</i> is woody<br>oligotrophic vegetation on white-<br>sand areas] | 11.51                                                             | 0.00           | 29.11               | 0.00           | 7.28                    | 0.00          | 33.14                      | 0.00           | 0.00                                  | 0.00          |
|                                                                                          | Contact zones <sup>4</sup>                                                                                       | 12,302.18                                                         | 0.19           | 1,025.92            | 0.02           | 1,456.25                | 0.02          | 859.13                     | 0.01           | 998.20                                | 0.01          |
|                                                                                          | Seasonal, deciduous forest                                                                                       | 343.18                                                            | 0.00           | 132.51              | 0.00           | 111.68                  | 0.00          | 77.88                      | 0.00           | 96.62                                 | 0.00          |
|                                                                                          | Seasonal, semideciduous forest                                                                                   | 12,964.62                                                         | 0.20           | 5,430.08            | 0.08           | 1,021.43                | 0.02          | 283.75                     | 0.00           | 348.07                                | 0.01          |
|                                                                                          | Open-canopy rainforest                                                                                           | 49,877.32                                                         | 0.82           | 30,385.36           | 0.47           | 1,634.80                | 0.03          | 2,154.20                   | 0.04           | 109.69                                | 0.00          |
|                                                                                          | Dense-canopy rainforest                                                                                          | 69,385.46                                                         | 1.29           | 121,085.90          | 2.23           | 4,622.16                | 0.08          | 38,332.61                  | 0.70           | 7.77                                  | 0.00          |
|                                                                                          | Pioneer vegetation in areas with<br>riverine influence                                                           | 710.87                                                            | 0.00           | 558.03              | 0.00           | 3,408.43                | 0.00          | 147.33                     | 0.00           | 0.26                                  | 0.00          |
|                                                                                          | Seasonal forested savanna                                                                                        | 4,180.52                                                          | 0.03           | 1,711.20            | 0.01           | 2,364.13                | 0.02          | 113.50                     | 0.00           | 681.88                                | 0.01          |
|                                                                                          | Total                                                                                                            | 149,775.67<br>(98%)                                               | 2.53<br>(100%) | 160,358.12<br>(99%) | 2.81<br>(100%) | 14,626.17<br>(54%)      | 0.17<br>(85%) | 42,001.54<br>(99%)         | 0.76<br>(100%) | 2,242.48<br>(28%)                     | 0.03<br>(63%) |
|                                                                                          | Other vegetation types<br>(Non-Forest)                                                                           | Arboreal <i>campinarana</i> and<br>grassy-wood <i>campinarana</i> | 30.20          | 0.00                | 57.07          | 0.00                    | 51.23         | 0.00                       | 63.99          | 0.00                                  | 0.00          |
| Contact zone between savanna<br>and steppe-like savanna                                  |                                                                                                                  | 0.20                                                              | 0.00           | 0.00                | 0.00           | 3.53                    | 0.00          | 0.00                       | 0.00           | 0.00                                  | 0.00          |
| Pioneer vegetation in areas with<br>marine influence                                     |                                                                                                                  | 50.29                                                             | 0.00           | 100.35              | 0.00           | 22.48                   | 0.00          | 48.13                      | 0.00           | 0.00                                  | 0.00          |
| Refugium areas                                                                           |                                                                                                                  | 12.21                                                             | 0.00           | 4.49                | 0.00           | 12.78                   | 0.00          | 0.00                       | 0.00           | 0.00                                  | 0.00          |
| Seasonal treed savanna                                                                   |                                                                                                                  | 1,970.64                                                          | 0.01           | 381.11              | 0.00           | 6,077.52                | 0.02          | 86.67                      | 0.00           | 4,396.49                              | 0.01          |
| Seasonal grassy-woody savanna                                                            |                                                                                                                  | 61.99                                                             | 0.00           | 63.84               | 0.00           | 948.55                  | 0.00          | 19.54                      | 0.00           | 264.16                                | 0.00          |
| Seasonal parkland savanna                                                                |                                                                                                                  | 432.95                                                            | 0.00           | 358.11              | 0.00           | 5,104.80                | 0.01          | 79.33                      | 0.00           | 1,172.78                              | 0.00          |
| Total                                                                                    |                                                                                                                  | 2,558.49<br>(2%)                                                  | 0.01           | 964.98<br>(1%)      | 0.00           | 12,220.89<br>(46%)      | 0.03<br>(15%) | 297.65<br>(1%)             | 0.00           | 5,833.43<br>(72%)                     | 0.02<br>(37%) |
| Overall total                                                                            | 152,334.15                                                                                                       | 2.53                                                              | 161,323.10     | 2.82                | 26,847.05      | 0.20                    | 42,299.19     | 0.76                       | 8,075.91       | 0.05                                  |               |

<sup>1</sup>Carbon map (Nogueira et al. 2015) is derived by vegetation map of Legal Amazonia at a scale of 1:250,000 from Brazil, IBGE (1992);

<sup>2</sup>Overlap between polygons of non-forest class of PRODES and IBGE forest polygons;

<sup>3</sup>Deforestation detected by PMDBBS through 2010 including forest and non-forest vegetation in the *cerrado* biome that PRODES classifies as non-forest and forest for which clear-cutting was not mapped in previous years;

<sup>4</sup>*Contact zones*: Contact between rainforest and seasonal forest; Contact between savanna steppe and seasonal forest; Contact between savanna and seasonal forest; Contact between savanna and rainforest; Contact between *campinarana* (oligotrophic vegetation on white-sand soil) and rainforest.



**Table S5** Areas of land-cover classes and the corresponding carbon for each settlement analyzed. Total deforestation represents the PRODES (~ 2013) + PMDBBS (~ 2010) data.

| Code        | Settlement name                | Deforestation  |                                    |                |                                    | Forest (PRODES) |                                     | Non-Forest (PRODES) |                                     | Areas covered by clouds (PRODES) |                                     | Total vegetation remaining (forest+non-forest+clouds) |                                     | Carbon stock in pre-modern period   | Water     |
|-------------|--------------------------------|----------------|------------------------------------|----------------|------------------------------------|-----------------|-------------------------------------|---------------------|-------------------------------------|----------------------------------|-------------------------------------|-------------------------------------------------------|-------------------------------------|-------------------------------------|-----------|
|             |                                | PRODES (~2013) |                                    | PMDBBS (~2010) |                                    | Area (ha)       | Carbon stock (Mg ha <sup>-1</sup> ) | Area (ha)           | Carbon stock (Mg ha <sup>-1</sup> ) | Area (ha)                        | Carbon stock (Mg ha <sup>-1</sup> ) | Area (ha)                                             | Carbon stock (Mg ha <sup>-1</sup> ) | Carbon stock (Mg ha <sup>-1</sup> ) | Area (ha) |
|             |                                | Area (ha)      | Carbon loss (Mg ha <sup>-1</sup> ) | Area (ha)      | Carbon loss (Mg ha <sup>-1</sup> ) |                 |                                     |                     |                                     |                                  |                                     |                                                       |                                     |                                     |           |
| <b>ACRE</b> |                                |                |                                    |                |                                    |                 |                                     |                     |                                     |                                  |                                     |                                                       |                                     |                                     |           |
| AC0003004   | PAR MÁRIO LOBÃO                | 33470.0        | 5251563.6                          | 0.0            | 0.0                                | 39363.1         | 5705046.8                           |                     |                                     |                                  |                                     | 39363.1                                               | 5705046.8                           | 10956610.4                          | 236.6     |
| AC0003008   | PAR ALELUIA<br>PAD PEDRO       | 1505.9         | 151868.7                           | 0.0            | 0.0                                | 10409.7         | 1049814.3                           |                     | 5.8                                 | 581.8                            | 10415.4                             | 1050396.1                                             | 1202264.8                           |                                     |           |
| AC0005000   | PEIXOTO<br>PAD BOA             | 217223.0       | 39488673.9                         | 0.0            | 0.0                                | 79661.6         | 14549041.7                          |                     | 114.7                               | 21383.7                          | 79776.3                             | 14570425.3                                            | 54059099.2                          |                                     |           |
| AC0006000   | ESPERANÇA                      | 41701.0        | 6384251.1                          | 0.0            | 0.0                                | 34394.4         | 4915175.3                           |                     | 19.6                                | 1973.9                           | 34414.0                             | 4917149.2                                             | 11301400.3                          | 19.7                                |           |
| AC0007000   | PAD QUIXADÁ                    | 52728.3        | 9351760.0                          | 0.0            | 0.0                                | 23030.5         | 3998864.2                           |                     |                                     |                                  | 23030.5                             | 3998864.2                                             | 13350624.2                          |                                     |           |
| AC0008000   | PAD HUMAITÁ                    | 44975.0        | 7530713.9                          | 0.0            | 0.0                                | 15912.8         | 2619450.4                           |                     |                                     |                                  | 15912.8                             | 2619450.4                                             | 10150164.4                          |                                     |           |
| AC0009000   | PAD SANTA LUZIA                | 23970.1        | 4223165.0                          | 0.0            | 0.0                                | 18526.9         | 3294794.7                           |                     | 14246.3                             | 2533121.3                        | 32773.3                             | 5827916.0                                             | 10051081.0                          |                                     |           |
| AC0010000   | PA ESPINHARA                   | 1235.9         | 195828.5                           | 0.0            | 0.0                                | 378.1           | 54932.3                             |                     |                                     |                                  | 378.1                               | 54932.3                                               | 250760.9                            |                                     |           |
| AC0011000   | PA FIGUEIRA                    | 14574.1        | 1729179.3                          | 0.0            | 0.0                                | 10787.9         | 1225297.0                           |                     |                                     |                                  | 10787.9                             | 1225297.0                                             | 2954476.3                           |                                     |           |
| AC0012000   | PA VISTA ALEGRE                | 421.0          | 76399.1                            | 0.0            | 0.0                                | 509.2           | 89961.0                             |                     |                                     |                                  | 509.2                               | 89961.0                                               | 166360.1                            |                                     |           |
| AC0013000   | PAE REMANSO<br>PAE SANTA       | 8714.2         | 1601554.7                          | 0.0            | 0.0                                | 34921.4         | 6166605.3                           |                     |                                     |                                  | 34921.4                             | 6166605.3                                             | 7768160.0                           |                                     |           |
| AC0014000   | QUITÉRIA                       | 11605.6        | 1521866.5                          | 0.0            | 0.0                                | 31193.7         | 3814467.3                           |                     | 22.9                                | 2861.1                           | 31216.6                             | 3817328.4                                             | 5339195.0                           |                                     |           |
| AC0015000   | PA SÃO PEDRO                   | 10256.7        | 1900808.7                          | 0.0            | 0.0                                | 15166.7         | 2816977.1                           |                     |                                     |                                  | 15166.7                             | 2816977.1                                             | 4717785.8                           |                                     |           |
| AC0016000   | PAE CHICO MENDES               | 2655.7         | 494994.8                           | 0.0            | 0.0                                | 21180.6         | 3949599.5                           |                     |                                     |                                  | 21180.6                             | 3949599.5                                             | 4444594.2                           |                                     |           |
| AC0017000   | PA PAVÃO                       | 767.4          | 142839.8                           | 0.0            | 0.0                                | 3452.8          | 643659.7                            |                     | 6.3                                 | 1183.6                           | 3459.2                              | 644843.2                                              | 787683.1                            |                                     |           |
| AC0018000   | PAE PORTO DIAS                 | 4363.2         | 770765.8                           | 0.0            | 0.0                                | 19905.3         | 3507063.0                           |                     |                                     |                                  | 19905.3                             | 3507063.0                                             | 4277828.8                           |                                     |           |
| AC0019000   | PAE RIOZINHO<br>PA SÃO JOÃO DO | 1800.1         | 292295.1                           | 0.0            | 0.0                                | 28582.2         | 4802500.2                           |                     |                                     |                                  | 28582.2                             | 4802500.2                                             | 5094795.3                           |                                     |           |
| AC0020000   | BALANCEIO                      | 12580.6        | 2335082.7                          | 0.0            | 0.0                                | 5189.2          | 964423.7                            |                     |                                     |                                  | 5189.2                              | 964423.7                                              | 3299506.3                           |                                     |           |
| AC0022000   | PAE PORTO RICO                 | 3069.8         | 572190.5                           | 0.0            | 0.0                                | 4758.1          | 887211.0                            |                     |                                     |                                  | 4758.1                              | 887211.0                                              | 1459401.5                           |                                     |           |
| AC0023000   | PA CARÃO                       | 8911.3         | 1362689.5                          | 0.0            | 0.0                                | 2324.9          | 341083.4                            |                     |                                     |                                  | 2324.9                              | 341083.4                                              | 1703772.9                           |                                     |           |

|           |                                |         |           |     |     |         |           |      |         |           |           |           |     |
|-----------|--------------------------------|---------|-----------|-----|-----|---------|-----------|------|---------|-----------|-----------|-----------|-----|
| AC0024000 | PA SANTO ANTONIO<br>DO PEIXOTO | 9994.2  | 1788199.5 | 0.0 | 0.0 | 5249.2  | 948948.7  |      | 5249.2  | 948948.7  | 2737148.3 |           |     |
| AC0025000 | PA CUMARU                      | 4828.4  | 897126.3  | 0.0 | 0.0 | 2721.8  | 507131.9  |      | 2721.8  | 507131.9  | 1404258.3 |           |     |
| AC0026000 | PA NAZARÉ                      | 3607.0  | 365407.4  | 0.0 | 0.0 | 4383.4  | 459889.1  | 8.6  | 863.3   | 4392.0    | 460752.3  | 826159.8  | 2.9 |
| AC0027000 | PA BENFICA                     | 5028.8  | 926858.6  | 0.0 | 0.0 | 364.9   | 64072.0   |      | 364.9   | 64072.0   | 990930.6  |           |     |
| AC0028000 | PA NOVO DESTINO                | 9613.3  | 1308029.5 | 0.0 | 0.0 | 25762.4 | 2776138.1 |      | 25762.4 | 2776138.1 | 4084167.6 | 65.0      |     |
| AC0029000 | PA FAVO DE MEL                 | 7689.3  | 1375185.9 | 0.0 | 0.0 | 2175.5  | 395341.3  |      | 2175.5  | 395341.3  | 1770527.2 |           |     |
| AC0030000 | PA COLIBRI                     | 703.0   | 120022.8  | 0.0 | 0.0 | 644.0   | 110483.9  |      | 644.0   | 110483.9  | 230506.7  |           |     |
| AC0031000 | PA BAIXA VERDE                 | 4090.8  | 759042.3  | 0.0 | 0.0 | 623.1   | 115811.7  |      | 623.1   | 115811.7  | 874854.0  |           |     |
| AC0032000 | PA SÃO GABRIEL                 | 7468.4  | 1385858.0 | 0.0 | 0.0 | 2618.8  | 482487.7  |      | 2618.8  | 482487.7  | 1868345.7 |           |     |
| AC0033000 | PA AMÔNIA                      | 2551.8  | 426791.5  | 0.0 | 0.0 | 3994.6  | 647730.8  |      | 3994.6  | 647730.8  | 1074522.2 | 71.1      |     |
| AC0034000 | PA TRACUÁ                      | 377.7   | 70168.9   | 0.0 | 0.0 | 4810.6  | 896606.9  |      | 4810.6  | 896606.9  | 966775.8  |           |     |
| AC0035000 | PA NOVA CINTRA                 | 1017.6  | 188180.3  | 0.0 | 0.0 | 420.3   | 77933.4   |      | 420.3   | 77933.4   | 266113.7  | 25.3      |     |
| AC0036000 | PA IUCATAN                     | 840.1   | 148580.0  | 0.0 | 0.0 | 7.2     | 1342.3    |      | 7.2     | 1342.3    | 149922.3  | 1.5       |     |
| AC0037000 | PA RIO AZUL                    | 447.1   | 77925.8   | 0.0 | 0.0 | 2538.6  | 446388.0  |      | 2538.6  | 446388.0  | 524313.8  |           |     |
| AC0038000 | PA AMENA                       | 618.9   | 94681.8   | 0.0 | 0.0 | 1232.2  | 194476.3  |      | 1232.2  | 194476.3  | 289158.0  |           |     |
| AC0039000 | PA ENVIRA                      | 3435.9  | 562471.3  | 0.0 | 0.0 | 2277.8  | 385420.9  |      | 2277.8  | 385420.9  | 947892.1  | 6.7       |     |
| AC0040000 | PA SÃO DOMINGOS                | 1013.5  | 175299.4  | 0.0 | 0.0 | 71.6    | 13069.9   |      | 71.6    | 13069.9   | 188369.3  |           |     |
| AC0041000 | PA CAQUETÁ                     | 11501.2 | 2106880.9 | 0.0 | 0.0 | 5982.8  | 1062666.9 |      | 5982.8  | 1062666.9 | 3169547.7 |           |     |
| AC0042000 | PA TRIUNFO                     | 9827.0  | 1724435.0 | 0.0 | 0.0 | 2460.1  | 437639.9  |      | 2460.1  | 437639.9  | 2162074.9 |           |     |
| AC0043000 | PA PARANÁ DOS<br>MOURAS        | 4103.8  | 762738.9  | 0.0 | 0.0 | 19683.9 | 3663126.0 | 24.0 | 4468.9  | 19707.8   | 3667594.9 | 4430333.8 |     |
| AC0045000 | PAE CANARY                     | 783.5   | 98617.8   | 0.0 | 0.0 | 8393.4  | 876089.1  |      | 8393.4  | 876089.1  | 974706.8  |           |     |
| AC0046000 | PA BOA ÁGUA                    | 3174.8  | 540965.7  | 0.0 | 0.0 | 948.4   | 163338.5  |      | 948.4   | 163338.5  | 704304.1  |           |     |
| AC0047000 | PA TARAUACÁ                    | 6411.8  | 1102185.1 | 0.0 | 0.0 | 6562.4  | 1141935.9 |      | 6562.4  | 1141935.9 | 2244121.0 | 52.9      |     |
| AC0048000 | PA PORTO ACRE                  | 1342.4  | 151158.5  | 0.0 | 0.0 | 727.5   | 83958.9   |      | 727.5   | 83958.9   | 235117.5  |           |     |
| AC0049000 | PA GAL. MORENO<br>MAIA         | 12256.1 | 2132609.7 | 0.0 | 0.0 | 8321.3  | 1457427.7 |      | 8321.3  | 1457427.7 | 3590037.4 | 63.6      |     |
| AC0050000 | PA VITÓRIA                     | 363.1   | 55671.5   | 0.0 | 0.0 | 826.0   | 138056.7  |      | 826.0   | 138056.7  | 193728.2  | 43.1      |     |
| AC0051000 | PA SANTA ROSA                  | 1130.7  | 196739.5  | 0.0 | 0.0 | 3733.2  | 656414.6  |      | 3733.2  | 656414.6  | 853154.1  | 62.9      |     |
| AC0052000 | PA TOCANTINS                   | 14599.4 | 1704139.6 | 0.0 | 0.0 | 9721.0  | 1205167.0 |      | 9721.0  | 1205167.0 | 2909306.5 |           |     |

|           |                                 |         |           |     |     |         |           |       |         |           |           |           |      |
|-----------|---------------------------------|---------|-----------|-----|-----|---------|-----------|-------|---------|-----------|-----------|-----------|------|
| AC0053000 | PA ORION                        | 11256.0 | 1985816.5 | 0.0 | 0.0 | 5289.7  | 932489.9  |       | 5289.7  | 932489.9  | 2918306.4 | 5.5       |      |
| AC0054000 | PAE LIMOEIRO                    | 434.2   | 70080.0   | 0.0 | 0.0 | 9723.5  | 1326654.5 |       | 9723.5  | 1326654.5 | 1396734.5 |           |      |
| AC0056000 | PA ORIENTE                      | 2277.4  | 279942.2  | 0.0 | 0.0 | 5651.4  | 660418.3  |       | 5651.4  | 660418.3  | 940360.5  |           |      |
| AC0057000 | PA LIMEIRA                      | 1419.9  | 264401.9  | 0.0 | 0.0 | 330.2   | 61519.9   |       | 330.2   | 61519.9   | 325921.8  |           |      |
| AC0058000 | PA TAQUARI                      | 1091.2  | 192329.5  | 0.0 | 0.0 | 8439.6  | 1487565.0 |       | 8439.6  | 1487565.0 | 1679894.5 |           |      |
| AC0059000 | PA LIBERDADE                    | 3995.6  | 406399.2  | 0.0 | 0.0 | 22362.3 | 2299244.2 | 13.3  | 1342.8  | 22375.6   | 2300587.0 | 2706986.2 | 94.0 |
| AC0060000 | PA ESPINHARA - II               | 3455.2  | 362840.8  | 0.0 | 0.0 | 2762.6  | 279800.9  |       | 2762.6  | 279800.9  | 642641.7  |           |      |
| AC0061000 | PA ALCOBRÁS                     | 5396.5  | 992078.5  | 0.0 | 0.0 | 2291.2  | 416329.2  |       | 2291.2  | 416329.2  | 1408407.8 |           |      |
| AC0062000 | PA PORTO ALONSO                 | 4382.7  | 805253.8  | 0.0 | 0.0 | 4756.3  | 860004.9  |       | 4756.3  | 860004.9  | 1665258.7 |           |      |
| AC0063000 | PA TRÊS MENINAS                 | 1445.6  | 267996.1  | 0.0 | 0.0 | 495.1   | 92030.9   |       | 495.1   | 92030.9   | 360027.0  |           |      |
| AC0064000 | PA PÃO DE AÇUCAR                | 4475.1  | 832813.2  | 0.0 | 0.0 | 1771.0  | 329960.0  |       | 1771.0  | 329960.0  | 1162773.2 |           |      |
| AC0065000 | PA TREZE DE MAIO                | 1839.0  | 334088.5  | 0.0 | 0.0 | 980.5   | 180703.2  |       | 980.5   | 180703.2  | 514791.7  | 14.7      |      |
| AC0066000 | PA PRINCEZA                     | 507.6   | 90631.8   | 0.0 | 0.0 | 556.5   | 100203.2  |       | 556.5   | 100203.2  | 190835.0  |           |      |
| AC0068000 | PDS SÃO SALVADOR                | 3220.1  | 558023.1  | 0.0 | 0.0 | 47652.6 | 8383364.5 | 23.9  | 4191.7  | 47676.6   | 8387556.2 | 8945579.3 |      |
| AC0070000 | PA TUPÁ                         | 3199.9  | 382390.6  | 0.0 | 0.0 | 2989.9  | 304597.4  |       | 2989.9  | 304597.4  | 686987.9  |           |      |
| AC0071000 | PAE EQUADOR                     | 1122.6  | 209027.5  | 0.0 | 0.0 | 6748.9  | 1258157.8 |       | 6748.9  | 1258157.8 | 1467185.3 |           |      |
| AC0072000 | PAE CRUZEIRO DO VALE            | 1867.3  | 258667.2  | 0.0 | 0.0 | 75712.4 | 9640213.7 | 388.7 | 67489.5 | 76101.2   | 9707703.2 | 9966370.4 |      |
| AC0074000 | PA NARCISO ASSUNÇÃO             | 654.8   | 114258.7  | 0.0 | 0.0 | 3863.0  | 680125.9  | 426.0 | 75078.9 | 4289.0    | 755204.8  | 869463.5  |      |
| AC0075000 | PA PEDRO FIRMINO                | 813.5   | 143371.0  | 0.0 | 0.0 | 5535.0  | 975596.7  | 44.6  | 7859.6  | 5579.6    | 983456.4  | 1126827.4 |      |
| AC0076000 | PA Zaqueu MACHADO               | 3482.1  | 644722.5  | 0.0 | 0.0 | 276.3   | 51355.4   |       | 276.3   | 51355.4   | 696078.0  |           |      |
| AC0077000 | PE POLO AGROF. DOM MOACIR       | 285.8   | 47480.3   | 0.0 | 0.0 | 34.9    | 5923.8    |       | 34.9    | 5923.8    | 53404.1   |           |      |
| AC0078000 | PA PORFIRIO PONCIANO            | 11.9    | 2211.7    | 0.0 | 0.0 | 1747.6  | 325883.6  |       | 1747.6  | 325883.6  | 328095.3  |           |      |
| AC0079000 | PE POLO AGROFLORESTAL BRASILÉIA | 418.4   | 72079.9   | 0.0 | 0.0 | 120.3   | 21185.2   |       | 120.3   | 21185.2   | 93265.0   |           |      |
| AC0081000 | PE POLO AGROF. WILSON PINHEIRO  | 251.1   | 28578.7   | 0.0 | 0.0 | 49.5    | 4993.4    |       | 49.5    | 4993.4    | 33572.1   |           |      |
| AC0082000 | PE POLO AGROF. RODRIGUES ALVES  | 204.6   | 37926.5   | 0.0 | 0.0 | 54.3    | 10088.8   |       | 54.3    | 10088.8   | 48015.3   |           |      |
| AC0083000 | PE POLO AGROF. MÂNCIO LIMA      | 224.9   | 40600.7   | 0.0 | 0.0 | 151.0   | 27579.7   |       | 151.0   | 27579.7   | 68180.4   |           |      |
| AC0084000 | PE POLO AGROF. CRUZEIRO DO SUL  | 181.6   | 32235.9   | 0.0 | 0.0 | 138.1   | 25269.4   |       | 138.1   | 25269.4   | 57505.3   |           |      |

|           |                                   |         |           |     |     |         |           |        |          |         |           |           |      |
|-----------|-----------------------------------|---------|-----------|-----|-----|---------|-----------|--------|----------|---------|-----------|-----------|------|
| AC0085000 | PE POLO AGROF.<br>XAPURI I        | 212.8   | 39326.2   | 0.0 | 0.0 | 152.3   | 27626.9   |        |          | 152.3   | 27626.9   | 66953.1   |      |
| AC0086000 | PE POLO AGROF.<br>XAPURI II       | 202.0   | 37392.0   | 0.0 | 0.0 | 29.3    | 5424.3    |        |          | 29.3    | 5424.3    | 42816.2   |      |
| AC0088000 | PE POLO<br>AGROFLORESTAL<br>FEIJÓ | 234.1   | 39322.1   | 0.0 | 0.0 |         |           |        |          | 0.0     | 0.0       | 39322.1   |      |
| AC0089000 | PE POLO LEITEIRO<br>DE PORTO ACRE | 198.2   | 33839.8   | 0.0 | 0.0 | 7.3     | 1267.3    |        |          | 7.3     | 1267.3    | 35107.0   |      |
| AC0090000 | PE POLO AGROF.<br>EPITACIOLÂNDIA  | 61.0    | 11347.3   | 0.0 | 0.0 | 69.0    | 12852.0   |        |          | 69.0    | 12852.0   | 24199.3   |      |
| AC0091000 | PA BERLIM RECREIO                 | 12032.3 | 2042514.0 | 0.0 | 0.0 | 12243.9 | 2019842.9 | 174.5  | 22122.9  | 12418.5 | 2041965.9 | 4084479.8 | 61.6 |
| AC0092000 | PA JOAQUIM DE<br>MATOS            | 2682.8  | 489610.0  | 0.0 | 0.0 | 2541.3  | 460470.4  |        |          | 2541.3  | 460470.4  | 950080.4  |      |
| AC0093000 | PCA CASULO<br>GERALDO<br>MESQUITA | 216.4   | 36338.1   | 0.0 | 0.0 | 6.6     | 1107.2    |        |          | 6.6     | 1107.2    | 37445.3   |      |
| AC0099000 | PAF PROVIDÊNCIA<br>CAPITAL        | 3770.2  | 658561.1  | 0.0 | 0.0 | 28536.0 | 5017465.5 |        |          | 28536.0 | 5017465.5 | 5676026.6 |      |
| AC0100000 | PA ARCO-IRIS                      | 644.0   | 120094.3  | 0.0 | 0.0 | 760.0   | 141721.5  |        |          | 760.0   | 141721.5  | 261815.8  |      |
| AC0101000 | PA ITAMARATY                      | 5277.0  | 647025.8  | 0.0 | 0.0 | 3529.1  | 421869.9  |        |          | 3529.1  | 421869.9  | 1068895.7 |      |
| AC0102000 | PAF HAVÁÍ<br>PDS JAMIL            | 102.3   | 18201.1   | 0.0 | 0.0 | 29579.3 | 5256740.4 |        |          | 29579.3 | 5256740.4 | 5274941.5 |      |
| AC0103000 | JEREISSATI                        | 4214.7  | 746954.1  | 0.0 | 0.0 | 38887.3 | 6879011.1 | 1700.2 | 297814.4 | 40587.5 | 7176825.4 | 7923779.5 |      |
| AC0104000 | PA PORTO LUIZ II                  | 219.5   | 40847.6   | 0.0 | 0.0 | 1754.2  | 327002.5  |        |          | 1754.2  | 327002.5  | 367850.1  |      |
| AC0105000 | PDS PORTO LUIZ I                  | 2705.2  | 492349.0  | 0.0 | 0.0 | 7201.2  | 1283484.0 |        |          | 7201.2  | 1283484.0 | 1775833.0 |      |
| AC0106000 | PA FORTALEZA                      | 499.9   | 92815.4   | 0.0 | 0.0 | 500.7   | 92214.0   |        |          | 500.7   | 92214.0   | 185029.4  |      |
| AC0107000 | PA PARAGUASSU                     | 3237.9  | 391752.8  | 0.0 | 0.0 | 544.4   | 59874.8   |        |          | 544.4   | 59874.8   | 451627.6  |      |
| AC0108000 | PA UIRAPURU                       | 889.7   | 90452.6   | 0.0 | 0.0 | 1024.1  | 104793.7  |        |          | 1024.1  | 104793.7  | 195246.3  |      |
| AC0109000 | PA JOÃO ADEMIR                    | 86.8    | 15064.5   | 0.0 | 0.0 | 170.8   | 29637.9   |        |          | 170.8   | 29637.9   | 44702.5   | 56.5 |
| AC0110000 | PA CASTELO<br>PDS NOVA            | 428.7   | 48088.1   | 0.0 | 0.0 | 47.4    | 4790.6    |        |          | 47.4    | 4790.6    | 52878.6   |      |
| AC0114000 | ESPERANÇA                         | 721.3   | 134506.2  | 0.0 | 0.0 | 2402.1  | 447936.6  |        |          | 2402.1  | 447936.6  | 582442.9  |      |
| AC0115000 | PAE BARREIRO                      | 539.4   | 99603.8   | 0.0 | 0.0 | 7622.0  | 1402207.1 |        |          | 7622.0  | 1402207.1 | 1501810.8 |      |
| AC0116000 | PA PETROLINA                      | 2605.5  | 483834.9  | 0.0 | 0.0 | 618.4   | 115104.7  |        |          | 618.4   | 115104.7  | 598939.5  |      |
| AC0117000 | PAF VALENCIA                      | 2408.3  | 417559.5  | 0.0 | 0.0 | 17941.8 | 3154757.9 | 967.7  | 170560.7 | 18909.5 | 3325318.5 | 3742878.1 |      |
| AC0118000 | PA JOÃO BATISTA                   | 1477.0  | 258718.0  | 0.0 | 0.0 | 2446.7  | 430292.7  |        |          | 2446.7  | 430292.7  | 689010.7  |      |
| AC0119000 | PDS BONAL                         | 1705.1  | 315754.7  | 0.0 | 0.0 | 9495.2  | 1770429.6 | 22.8   | 4258.7   | 9518.0  | 1774688.3 | 2090443.0 |      |
| AC0121000 | PA ALBERTO                        | 1265.3  | 229486.8  | 0.0 | 0.0 | 903.6   | 159482.7  |        |          | 903.6   | 159482.7  | 388969.4  |      |

## SANTIAGO

|           |                                    |        |           |     |     |         |           |       |          |         |           |           |       |
|-----------|------------------------------------|--------|-----------|-----|-----|---------|-----------|-------|----------|---------|-----------|-----------|-------|
| AC0122000 | PDS MINAS<br>PDS FRANCISCO         | 125.7  | 23332.0   | 0.0 | 0.0 | 2768.3  | 513529.7  |       |          | 2768.3  | 513529.7  | 536861.7  |       |
| AC0123000 | PIMENTEL                           | 2523.4 | 460739.5  | 0.0 | 0.0 | 51830.0 | 9518337.1 | 5.2   | 967.1    | 51835.2 | 9519304.2 | 9980043.8 |       |
| AC0124000 | PAF RECANTO                        | 314.4  | 55405.3   | 0.0 | 0.0 | 7864.0  | 1386025.8 | 829.5 | 146069.0 | 8693.4  | 1532094.8 | 1587500.1 |       |
| AC0127000 | PDS IVO NEVES                      | 1607.7 | 257525.6  | 0.0 | 0.0 | 2449.5  | 368590.8  |       |          | 2449.5  | 368590.8  | 626116.5  |       |
| AC0128000 | PDS WILSON LOPES                   | 8648.6 | 1610039.9 | 0.0 | 0.0 | 8213.0  | 1529205.2 |       |          | 8213.0  | 1529205.2 | 3139245.1 |       |
| AC0129000 | PA LUZ DA VIDA<br>PDS POLO RECANTO | 318.7  | 33684.2   | 0.0 | 0.0 | 60.7    | 6393.9    |       |          | 60.7    | 6393.9    | 40078.1   |       |
| AC0130000 | DO EQUADOR<br>PDS GERALDO          | 1043.1 | 194310.6  | 0.0 | 0.0 | 880.6   | 164168.5  |       |          | 880.6   | 164168.5  | 358479.1  |       |
| AC0131000 | FERNANDES<br>PDS POLO PIRÁ-DE-     | 654.4  | 121828.6  | 0.0 | 0.0 | 1295.7  | 241520.6  |       |          | 1295.7  | 241520.6  | 363349.2  |       |
| AC0132000 | RÁ<br>PDS LÍDIA                    | 1084.7 | 201143.9  | 0.0 | 0.0 | 281.5   | 52302.7   |       |          | 281.5   | 52302.7   | 253446.6  |       |
| AC0136000 | CRAVEIRO                           | 274.8  | 49365.6   | 0.0 | 0.0 | 530.2   | 95810.3   |       |          | 530.2   | 95810.3   | 145175.9  |       |
| AC0137000 | PA URUBURETAMA                     | 111.7  | 19401.3   | 0.0 | 0.0 | 2147.1  | 372609.2  |       |          | 2147.1  | 372609.2  | 392010.6  | 20.9  |
| AC0138000 | PDS SETE LAGOAS                    | 374.8  | 65355.7   | 0.0 | 0.0 | 2029.1  | 357510.4  |       |          | 2029.1  | 357510.4  | 422866.1  |       |
| AC0139000 | PA CALIFÓRNIA                      | 2537.2 | 440718.4  | 0.0 | 0.0 | 3120.6  | 548258.7  |       |          | 3120.6  | 548258.7  | 988977.1  |       |
| AC0141000 | PDS FLORESTA<br>PDS NOVA BAIXA     | 3104.5 | 467752.0  | 0.0 | 0.0 | 3285.9  | 422606.2  |       |          | 3285.9  | 422606.2  | 890358.2  |       |
| AC0147000 | VERDE                              | 2828.1 | 524814.5  | 0.0 | 0.0 | 2256.4  | 420192.8  |       |          | 2256.4  | 420192.8  | 945007.2  |       |
| AC0148000 | PA BARRO ALTO<br>PAE               | 3111.3 | 533868.7  | 0.0 | 0.0 | 2773.0  | 478958.2  |       |          | 2773.0  | 478958.2  | 1012826.9 |       |
| AC0149000 | TRIUNFO/PORONGA<br>BA              | 1754.6 | 302829.6  | 0.0 | 0.0 | 22718.5 | 3980586.4 |       |          | 22718.5 | 3980586.4 | 4283416.0 | 357.3 |
| AC0151000 | PA MIRITIZAL                       | 582.1  | 99016.1   | 0.0 | 0.0 | 4359.7  | 756214.3  | 69.5  | 12066.9  | 4429.3  | 768281.3  | 867297.3  |       |
| AC0152000 | PA BANDEIRANTE<br>PA ANTONIO DE    | 2950.5 | 297561.6  | 0.0 | 0.0 | 3129.2  | 315579.7  |       |          | 3129.2  | 315579.7  | 613141.2  |       |
| AC0153000 | HOLANDA                            | 1115.5 | 156178.8  | 0.0 | 0.0 | 1303.3  | 147120.2  |       |          | 1303.3  | 147120.2  | 303299.0  |       |
| AC0154000 | PDS PORTO CARLOS                   | 431.2  | 79972.2   | 0.0 | 0.0 | 1030.5  | 192010.1  |       |          | 1030.5  | 192010.1  | 271982.3  |       |
| AC0155000 | PAE MUNDURUCUS                     | 351.7  | 61200.7   | 0.0 | 0.0 | 7748.3  | 1357412.2 | 214.0 | 37432.4  | 7962.4  | 1394844.6 | 1456045.3 | 73.9  |
| AC0156000 | PA AGRO JURUA                      | 545.8  | 99698.4   | 0.0 | 0.0 | 1955.2  | 361891.7  |       |          | 1955.2  | 361891.7  | 461590.2  | 1.0   |
| AC0157000 | PDS TONICO SENA                    | 285.3  | 52403.0   | 0.0 | 0.0 | 9271.0  | 1718720.8 |       |          | 9271.0  | 1718720.8 | 1771123.7 |       |
| AC0158000 | PA ABIB CURY                       | 60.2   | 10152.2   | 0.0 | 0.0 | 3.6     | 562.0     |       |          | 3.6     | 562.0     | 10714.2   |       |
| AC0161000 | PDS NATAL                          | 561.3  | 97713.5   | 0.0 | 0.0 | 14509.0 | 2539246.0 | 0.7   | 119.7    | 14509.7 | 2539365.7 | 2637079.3 | 196.5 |

|           |                                          |          |             |     |     |         |            |       |          |           |           |           |             |             |            |
|-----------|------------------------------------------|----------|-------------|-----|-----|---------|------------|-------|----------|-----------|-----------|-----------|-------------|-------------|------------|
| AC0162000 | PDS CROA                                 | 351.5    | 59804.3     | 0.0 | 0.0 | 10127.6 | 1765166.5  |       |          | 391.9     | 68574.3   | 10519.4   | 1833740.8   | 1893545.1   | 36.4       |
| AC0163000 | PDS NOVA<br>PROMISSAO                    | 1506.1   | 278275.9    | 0.0 | 0.0 | 4389.4  | 807866.2   |       |          |           |           | 4389.4    | 807866.2    | 1086142.0   |            |
| AC0164000 | PDS CAMPO ALEGRE                         | 1388.5   | 257052.2    | 0.0 | 0.0 | 1704.0  | 315742.1   |       |          |           |           | 1704.0    | 315742.1    | 572794.3    |            |
|           | Total in Acre                            | 772447.4 | 131023212.8 | 0.0 | 0.0 | 1080437 | 175907867. | 0.7   | 119.7    | 19720.1   | 3482266.5 | 1100157   | 179390253.6 | 310413466.4 | 1569.6     |
|           |                                          |          |             |     |     | .0      | 4          |       |          |           |           | .8        |             |             |            |
|           | <b>AMAPÁ</b>                             |          |             | 0.0 | 0.0 |         |            |       |          |           |           | 0.0       | 0.0         | 0.0         |            |
| AP0003000 | PA PIQUIAZAL                             | 828.8    | 154548.7    | 0.0 | 0.0 | 1750.7  | 321750.0   | 70.0  | 12810.2  | 2968.7    | 553590.8  | 4789.4    | 888151.1    | 1042699.7   |            |
| AP0004000 | PA PERIMETRAL                            | 4690.3   | 869939.3    | 0.0 | 0.0 | 19246.4 | 3595457.0  |       |          | 18058.8   | 3373136.5 | 37305.2   | 6968593.6   | 7838532.9   | 1.2        |
| AP0005000 | PA CARNOT                                | 6758.8   | 1252738.2   | 0.0 | 0.0 | 17072.6 | 3182243.7  |       |          | 15468.1   | 2883771.1 | 32540.8   | 6066014.7   | 7318752.9   | 18.3       |
| AP0009000 | PA BOM JESUS                             | 3035.9   | 558761.3    | 0.0 | 0.0 | 15497.7 | 2889096.4  | 1264. |          | 34947.7   | 13078.3   | 2437011.4 | 29840.9     | 5361055.5   | 5919816.7  |
| AP0010000 | PA SERRA DO NAVIO                        | 1139.7   | 212548.5    | 0.0 | 0.0 | 10589.0 | 1978758.4  |       |          | 11964.6   | 2235913.8 | 22553.6   | 4214672.2   | 4427220.7   | 256.6      |
| AP0011000 | PA MATÃO DO<br>PIAÇACA                   | 2851.3   | 495079.5    | 0.0 | 0.0 | 16957.9 | 3145467.5  | 6377. |          | 195501.6  | 16737.1   | 3092341.4 | 40072.9     | 6433310.5   | 6928389.9  |
| AP0012000 | PA CEDRO                                 | 4991.6   | 927285.9    | 0.0 | 0.0 | 24977.0 | 4652107.0  | 4348. |          | 237566.5  | 24335.0   | 4530426.3 | 53660.8     | 9420099.8   | 10347385.7 |
| AP0013000 | PA MUNGUBA                               | 2552.1   | 476588.9    | 0.0 | 0.0 | 14163.1 | 2646881.2  |       |          |           | 17769.6   | 3320898.8 | 31932.6     | 5967780.1   | 6444368.9  |
| AP0014000 | PA NOVA COLINA                           | 3043.8   | 567030.9    | 0.0 | 0.0 | 12335.0 | 2300222.8  | 212.1 | 34334.8  | 11524.4   | 2149064.5 | 24071.5   | 4483622.1   | 5050653.1   |            |
| AP0015000 | PA SÃO BENEDITO<br>DO APOREMA            | 915.3    | 62577.2     | 0.0 | 0.0 | 470.8   | 36087.4    | 426.9 | 8765.1   | 497.4     | 37093.7   | 1395.1    | 81946.2     | 144523.4    |            |
| AP0016000 | PA PIQUIA DO<br>AMAPÁ                    | 1251.0   | 229856.3    | 0.0 | 0.0 | 985.0   | 183687.7   | 711.8 | 69419.5  | 1388.2    | 258283.6  | 3085.1    | 511390.8    | 741247.2    |            |
| AP0017000 | PA AGRO-<br>EXTRATIVISTA<br>MARACÁ       | 3197.9   | 503774.1    | 0.0 | 0.0 | 235343. | 42397856.2 | 6177  |          | 2214217.6 | 269802.   | 566922.   | 93152679.3  | 93656453.3  | 1447.5     |
| AP0018000 | PA MANOEL<br>JACINTO                     | 1085.4   | 202409.3    | 0.0 | 0.0 | 8105.9  | 1511577.5  | 873.4 | 162864.1 | 8354.4    | 1557919.2 | 17333.7   | 3232360.9   | 3434770.2   | 282.3      |
| AP0019000 | PAE AGRO-<br>EXTRATIVISTA<br>ANAUERAPUCU | 1711.6   | 206527.0    | 0.0 | 0.0 | 7874.0  | 1324244.3  | 1982  |          | 1616675.2 | 7589.2    | 1294045.1 | 35285.1     | 4234964.6   | 4441491.6  |
| AP0020000 | PA ITAUBAL                               | 3308.2   | 571721.3    | 0.0 | 0.0 | 1210.4  | 208756.3   | 8323. |          | 127115.9  | 804.1     | 131851.8  | 10337.4     | 467724.0    | 1039445.3  |
| AP0021000 | PA NOVA VIDA                             | 1634.4   | 304183.9    | 0.0 | 0.0 | 2771.0  | 516372.2   | 56.7  | 3073.1   | 3926.2    | 732154.2  | 6753.9    | 1251599.5   | 1555783.4   |            |
| AP0022000 | PA CRUZEIRO                              | 950.5    | 70313.8     | 0.0 | 0.0 | 1789.8  | 149032.1   | 866.1 | 20696.2  | 2838.1    | 219701.2  | 5494.0    | 389429.5    | 459743.3    |            |
| AP0023000 | PA NOVA CANAÃ<br>PA GOVERNADOR           | 1684.5   | 314537.1    | 0.0 | 0.0 | 8765.2  | 1637870.0  |       |          | 9957.2    | 1860447.7 | 18722.4   | 3498317.7   | 3812854.7   |            |
| AP0024000 | JANARY                                   | 769.0    | 105905.8    | 0.0 | 0.0 | 991.7   | 176965.5   | 8493. |          | 204438.6  | 1087.4    | 196721.9  | 10572.7     | 578126.0    | 684031.8   |
| AP0025000 | PA PANCADA DO<br>CAMAIPI                 | 927.6    | 170396.3    | 0.0 | 0.0 | 11113.8 | 2050521.6  | 6     |          |           | 12925.9   | 2395645.9 | 24039.7     | 4446167.5   | 4616563.8  |
| AP0026000 | PA CUJUBIM                               | 2183.9   | 396659.5    | 0.0 | 0.0 | 4214.6  | 784164.9   | 1506. |          | 81041.7   | 2505.8    | 466353.9  | 8226.5      | 1331560.5   | 1728220.0  |
|           |                                          |          |             |     |     |         |            | 1     |          |           |           |           |             |             |            |

|                 |                                |          |            |     |     |          |             |        |           |          |            |           |             |                    |
|-----------------|--------------------------------|----------|------------|-----|-----|----------|-------------|--------|-----------|----------|------------|-----------|-------------|--------------------|
| AP0028000       | PA PEDRA BRANCA                | 3440.1   | 638747.4   | 0.0 | 0.0 | 11571.2  | 2161479.9   |        |           | 14432.6  | 2696179.5  | 26003.8   | 4857659.3   | 5496406.7          |
| AP0029000       | PA CORRE ÁGUA                  | 2037.7   | 343709.5   | 0.0 | 0.0 | 1664.5   | 293058.2    | 319.0  | 20290.1   | 2115.3   | 373129.7   | 4098.8    | 686478.1    | 1030187.5          |
| AP0030000       | PA VILA VELHA DO CASSIPORÉ     | 1370.2   | 250065.5   | 0.0 | 0.0 | 12873.4  | 2384695.9   | 572.1  | 45523.9   | 13737.8  | 2544632.6  | 27183.3   | 4974852.4   | 5224917.9 234.5    |
| AP0031000       | PA LOURENÇO                    | 1529.0   | 283686.6   | 0.0 | 0.0 | 9882.2   | 1842879.4   | 26.3   | 4904.3    | 15969.4  | 2980056.0  | 25877.9   | 4827839.6   | 5111526.2          |
| AP0035000       | PA IGARAPÉ GRANDE              | 184.9    | 34475.6    | 0.0 | 0.0 | 741.4    | 138263.6    | 33.9   | 6325.9    | 248.1    | 46259.2    | 1023.4    | 190848.7    | 225324.2           |
| AP0037000       | PDS - IRINEU E FELIPE          | 134.8    | 20868.8    | 0.0 | 0.0 | 5128.1   | 611962.2    | 646.8  | 19745.4   | 4735.2   | 649932.0   | 10510.1   | 1281639.7   | 1302508.5 41.7     |
| AP0038000       | PA FERREIRINHA                 | 918.6    | 63830.2    | 0.0 | 0.0 | 2368.4   | 333758.1    | 16.6   | 387.3     | 2171.3   | 305110.5   | 4556.4    | 639255.9    | 703086.0           |
| AP0039000       | PA SANTO ANTÔNIO DA PEDREIRA   | 0.0      | 0.0        | 0.0 | 0.0 |          |             |        | 745.5     | 7022.9   |            | 745.5     | 7022.9      | 7023.0             |
| AP0044000       | PAE IPIXUNA MIRANDA            | 0.0      | 0.0        | 0.0 | 0.0 | 855.4    | 118815.1    | 929.2  | 31863.9   | 863.0    | 130366.1   | 2647.6    | 281045.1    | 281045.1 157.6     |
| AP0045000       | PAE BARREIRO                   | 46.6     | 8158.6     | 0.0 | 0.0 | 883.9    | 154674.6    | 361.0  | 63168.0   | 817.5    | 143070.8   | 2062.4    | 360913.4    | 369072.0 0.5       |
| AP0046000       | PAE FOZ DO MAZAGAO VELHO       | 53.9     | 9429.3     | 0.0 | 0.0 | 7010.6   | 1226622.5   | 556.8  | 97258.9   | 6029.8   | 1054326.3  | 13597.2   | 2378207.6   | 2387636.9 86.5     |
| AP0047000       | PAE SUCURIJU                   | 0.0      | 0.0        | 0.0 | 0.0 | 6040.9   | 661715.8    |        |           | 3048.5   | 333935.6   | 9089.4    | 995651.4    | 995651.4 328.1     |
| AP0048000       | PAE CARAPANATUBA               | 23.3     | 4078.5     | 0.0 | 0.0 | 873.6    | 152881.5    | 396.3  | 69359.8   | 2194.1   | 383974.8   | 3464.1    | 606216.1    | 610294.6 167.6     |
| AP0049000       | PAE NOSSA SENHORA DA CONCEIÇÃO | 0.0      | 0.0        | 0.0 | 0.0 | 342.8    | 59987.0     | 40.9   | 7163.6    | 682.0    | 119346.6   | 1065.7    | 186497.2    | 186497.2 0.2       |
| AP0050000       | PAE IGARAPE NOVO               | 0.0      | 0.0        | 0.0 | 0.0 | 75.6     | 13222.4     | 1.3    | 229.2     |          |            | 76.9      | 13451.6     | 13451.6 7.9        |
|                 | Total in Amapá                 | 59250.6  | 10310432.8 | 0.0 | 0.0 | 476537.0 | 85843135.8  | 75.2   | 5396711.3 | 520625.6 | 94027297.9 | 1116937.8 | 185267145.0 | 195577577.8 3159.7 |
| <b>AMAZONAS</b> |                                |          | 0.0        | 0.0 | 0.0 |          |             |        |           |          |            | 0.0       | 0.0         | 0.0                |
| AM0006000       | PIC BELA VISTA                 | 62473.8  | 11178508.8 | 0.0 | 0.0 | 42213.4  | 7575772.1   | 1381.5 | 2429077.2 | 6100.9   | 1109604.1  | 62125.8   | 11114453.4  | 22292962.3 32541.3 |
| AM0007000       | PA RIO JUMA                    | 139500.8 | 24132503.4 | 0.0 | 0.0 | 593855.8 | 103418847.2 | 9449.9 | 596941.8  | 3973.4   | 742173.1   | 607279.1  | 104757962.1 | 128890465.4 2797.2 |
| AM0008000       | PA CRAJARI                     | 1297.9   | 228759.8   | 0.0 | 0.0 | 9179.8   | 1618030.5   |        |           | 1531.9   | 270010.1   | 10711.7   | 1888040.5   | 2116800.4          |
| AM0009000       | PA UATUMÃ                      | 5440.6   | 1009361.0  | 0.0 | 0.0 | 17849.8  | 3334048.2   |        |           | 226.5    | 42254.6    | 18076.3   | 3376302.8   | 4385663.8          |
| AM0010000       | PA URUMUTUM                    | 2018.9   | 350339.8   | 0.0 | 0.0 | 1127.4   | 195635.1    |        |           | 1545.6   | 268203.3   | 2673.0    | 463838.4    | 814178.2           |
| AM0011000       | PA PURAQUEQUARA                | 554.0    | 102006.5   | 0.0 | 0.0 | 1422.4   | 264469.1    |        |           |          |            | 1422.4    | 264469.1    | 366475.5 19.3      |
| AM0012000       | PAE ANTIMARY                   | 12475.7  | 1952612.1  | 0.0 | 0.0 | 259695.7 | 42101895.4  | 2697.9 | 468818.2  |          |            | 262393.7  | 42570713.6  | 44523325.8 745.3   |
| AM0013000       | PA VILA AMAZÔNIA               | 35752.4  | 6482367.9  | 0.0 | 0.0 | 17512.7  | 3260301.6   | 4522.7 | 272967.8  | 16668.5  | 3104846.9  | 38703.9   | 6638116.3   | 13120484.2 7356.4  |
| AM0014000       | PA NOVA RESIDÊNCIA             | 823.7    | 152733.1   | 0.0 | 0.0 | 1098.5   | 204659.0    |        |           | 141.9    | 26435.0    | 1240.4    | 231093.9    | 383827.1 133.1     |
| AM0015000       | PAE TERRUÃ                     | 1360.4   | 231654.8   | 0.0 | 0.0 | 897495.4 | 142823169.7 | 2.9    | 522.9     | 56354.9  | 9950214.6  | 953853.2  | 152773907.2 | 153005562.0 159.4  |

|           |                          |         |           |     |     |          |            |        |          |         |           |          |            |            |           |      |
|-----------|--------------------------|---------|-----------|-----|-----|----------|------------|--------|----------|---------|-----------|----------|------------|------------|-----------|------|
| AM0016000 | PA BERURI                | 952.1   | 176857.9  | 0.0 | 0.0 | 21573.3  | 4019714.2  | 39.1   | 7300.4   | 347.2   | 64722.3   | 21959.7  | 4091736.8  | 4268594.8  | 22.8      |      |
| AM0017000 | PA IPORA                 | 8510.9  | 1577044.3 | 0.0 | 0.0 | 19568.2  | 3645225.7  |        |          | 311.1   | 57992.1   | 19879.3  | 3703217.8  | 5280262.1  | 158.8     |      |
| AM0018000 | PA SAMPAIO               | 4558.3  | 818910.5  | 0.0 | 0.0 | 2843.4   | 527349.3   | 312.8  | 58291.4  | 2339.1  | 433473.4  | 5495.3   | 1019114.1  | 1838024.6  | 10.3      |      |
| AM0019000 | PA MATUPI                | 18168.4 | 3389406.4 | 0.0 | 0.0 | 16762.4  | 3129203.9  |        |          |         |           | 16762.4  | 3129203.9  | 6518610.3  |           |      |
| AM0020000 | PA PUXURIZAL             | 1459.9  | 272247.4  | 0.0 | 0.0 | 3119.4   | 581702.8   | 2.9    | 532.3    | 82.8    | 15445.6   | 3205.1   | 597680.7   | 869928.1   |           |      |
| AM0021000 | PA MONTE                 | 52068.5 | 9312267.5 | 0.0 | 0.0 | 60700.2  | 10818676.4 | 416.2  | 25940.1  | 7.4     | 1330.7    | 61123.7  | 10845947.2 | 20158214.7 |           |      |
| AM0022000 | PA CANOAS                | 3417.6  | 636968.0  | 0.0 | 0.0 | 10981.6  | 2039492.2  |        |          |         | 646.0     | 119437.4 | 11627.6    | 2158929.7  | 2795897.6 |      |
| AM0023000 | PA TARUMÃ MIRIM          | 6799.6  | 1266690.6 | 0.0 | 0.0 | 36862.8  | 6873370.1  |        |          |         | 136.6     | 25479.6  | 36999.5    | 6898849.7  | 8165540.3 | 17.8 |
| AM0024000 | PA ACARI                 | 22794.1 | 4192308.1 | 0.0 | 0.0 | 114851.6 | 20865367.7 | 2032.0 | 107392.6 | 10181.1 | 1894632.2 | 127064.7 | 22867392.5 | 27059700.6 | 124.3     |      |
| AM0025000 | PAE SANTO ANTÔNIO MOURÃO | 3559.1  | 617169.1  | 0.0 | 0.0 | 12738.1  | 2287587.1  |        |          |         | 5368.7    | 948086.7 | 18106.7    | 3235673.9  | 3852843.0 | 0.4  |
| AM0026000 | PA SANTO ANTÔNIO         | 1233.6  | 229140.3  | 0.0 | 0.0 | 2839.1   | 528236.0   |        |          | 1.0     | 178.3     | 2840.0   | 528414.3   | 757554.6   |           |      |
| AM0027000 | PA ÁGUA BRANCA           | 788.6   | 144489.4  | 0.0 | 0.0 | 486.5    | 90152.9    |        |          |         |           | 486.5    | 90152.9    | 234642.3   |           |      |
| AM0028000 | PA SÃO FRANCISCO         | 3687.8  | 619506.6  | 0.0 | 0.0 | 15503.5  | 2663538.5  |        |          |         |           | 15503.5  | 2663538.5  | 3283045.0  |           |      |
| AM0029000 | PAM IPIXUNA              | 3.7     | 645.1     | 0.0 | 0.0 | 8645.0   | 1515720.8  |        |          |         |           | 8645.0   | 1515720.8  | 1516366.0  | 55.1      |      |
| AM0030000 | PA UMARI                 | 1755.7  | 305770.2  | 0.0 | 0.0 | 6748.9   | 1187147.4  | 884.3  | 154067.7 |         |           | 7633.1   | 1341215.2  | 1646985.4  |           |      |
| AM0031000 | PA ALIANÇA               | 560.1   | 100359.9  | 0.0 | 0.0 | 2231.3   | 412176.5   |        |          | 0.1     | 24.1      | 2231.4   | 412200.6   | 512560.5   | 75.2      |      |
| AM0032000 | PA AQUIDABAN             | 1134.8  | 210559.8  | 0.0 | 0.0 | 793.4    | 147677.6   | 49.4   | 9138.2   | 123.9   | 23100.5   | 966.6    | 179916.4   | 390476.2   | 75.0      |      |
| AM0033000 | PA RIO PARDO             | 3431.2  | 639028.0  | 0.0 | 0.0 | 24654.5  | 4596468.0  |        |          |         | 98.3      | 18343.5  | 24752.8    | 4614811.4  | 5253839.5 |      |
| AM0034000 | PA PAQUEQUER             | 814.9   | 151920.2  | 0.0 | 0.0 | 1352.9   | 252285.2   |        |          | 2609.1  | 486538.3  | 3962.0   | 738823.5   | 890743.7   |           |      |
| AM0035000 | PA NAZARÉ                | 1316.8  | 244208.8  | 0.0 | 0.0 | 3266.9   | 609044.8   |        |          | 136.4   | 25429.8   | 3403.2   | 634474.5   | 878683.4   | 15.4      |      |
| AM0036000 | PA RIOZINHO              | 1927.8  | 359496.0  | 0.0 | 0.0 | 2474.2   | 461382.9   |        |          | 58.0    | 10818.6   | 2532.2   | 472201.5   | 831697.5   |           |      |
| AM0037000 | PA PACIÁ                 | 572.9   | 100976.1  | 0.0 | 0.0 | 2276.0   | 401161.9   |        |          |         |           | 2276.0   | 401161.9   | 502138.0   |           |      |
| AM0039000 | PDS MORENA               | 317.3   | 56377.0   | 0.0 | 0.0 | 13700.8  | 2539294.6  |        |          | 34421.6 | 6361023.4 | 48122.4  | 8900318.0  | 8956695.1  | 99.7      |      |
| AM0040000 | PA ENGENHO               | 417.9   | 77820.9   | 0.0 | 0.0 | 1841.5   | 343309.8   |        |          | 2.9     | 545.6     | 1844.4   | 343855.4   | 421676.3   |           |      |
| AM0041000 | PA CAVIANA               | 830.9   | 152673.0  | 0.0 | 0.0 | 4110.9   | 765605.6   | 11.6   | 2154.4   | 290.6   | 54188.9   | 4413.1   | 821948.9   | 974621.9   | 94.3      |      |
| AM0042000 | PAE MATUPIRI             | 319.2   | 56558.3   | 0.0 | 0.0 | 7901.9   | 1463284.8  | 1179.8 | 206579.1 |         |           | 9081.7   | 1669863.8  | 1726422.2  | 242.6     |      |
| AM0045000 | PA PIABA                 | 712.2   | 132774.8  | 0.0 | 0.0 | 2683.7   | 500380.1   |        |          |         |           | 2683.7   | 500380.1   | 633154.9   |           |      |
| AM0048000 | PA BÓIA                  | 642.1   | 112820.9  | 0.0 | 0.0 | 4828.7   | 847457.4   |        |          | 835.6   | 147009.9  | 5664.3   | 994467.3   | 1107288.2  | 212.7     |      |



|           |                               |         |           |     |     |                    |                          |              |                |              |            |                    |             |             |           |     |
|-----------|-------------------------------|---------|-----------|-----|-----|--------------------|--------------------------|--------------|----------------|--------------|------------|--------------------|-------------|-------------|-----------|-----|
| AM0049000 | PAE FLORA<br>AGRÍCOLA         | 1830.6  | 339169.1  | 0.0 | 0.0 | 126.4              | 23480.7                  |              |                | 852.1        | 158170.1   | 978.5<br>100364.   | 181650.8    | 520819.9    |           |     |
| AM0050000 | PAE BOTOS                     | 770.0   | 134127.8  | 0.0 | 0.0 | 97580.0            | 17056450.2               | 2784.<br>7   | 241029.7       |              |            | 7                  | 17297479.8  | 17431607.6  | 284.4     |     |
| AM0051000 | PAE JENIPAPOS                 | 1439.3  | 107562.4  | 0.0 | 0.0 | 37128.5            | 6570298.2                | 1496.<br>9   | 39849.3        |              |            |                    | 38625.4     | 6610147.5   | 6717709.9 | 4.6 |
| AM0054000 | PAE CASTANHO                  | 2238.8  | 404051.5  | 0.0 | 0.0 | 76709.7            | 14274122.2               |              |                | 6633.0       | 1235868.5  | 83342.7<br>129659. | 15509990.7  | 15914042.2  | 445.1     |     |
| AM0056000 | PAE CANAÃ                     | 755.2   | 140614.2  | 0.0 | 0.0 | 83553.9<br>584891. | 15155026.9<br>108175617. | 3546.<br>1   | 116519.1       | 42559.3      | 7710121.0  | 4                  | 22981667.0  | 23122281.3  | 930.6     |     |
| AM0057000 | PAE ABACAXIS                  | 2519.7  | 449074.0  | 0.0 | 0.0 | 5                  | 9                        | 1815.<br>7   | 92677.8        | 89761.1      | 16647940.9 | 3                  | 124916236.5 | 125365310.5 | 2593.8    |     |
| AM0058000 | PAE CURUPIRA                  | 18722.0 | 3368743.3 | 0.0 | 0.0 | 14479.1<br>155515. | 2614256.9                | 1565<br>9.1  | 1926985.2      | 110701.<br>0 | 20442387.4 | 3                  | 24983629.5  | 28352372.8  | 7126.3    |     |
| AM0059000 | PAE ABACAXIS II               | 4857.3  | 900968.8  | 0.0 | 0.0 | 3                  | 28548539.9               | 3506.<br>1   | 292743.0       | 115360.<br>1 | 21483376.6 | 5                  | 50324659.5  | 51225628.3  | 5532.7    |     |
| AM0060000 | PAE TROCANÃ                   | 3478.3  | 641941.6  | 0.0 | 0.0 | 57787.6            | 10268727.2               | 297.3        | 29171.3        | 7672.6       | 1419087.1  | 65757.5            | 11716985.6  | 12358927.2  | 2077.6    |     |
| AM0061000 | PA ESPIGÃO DO<br>ARARA        | 827.2   | 154251.1  | 0.0 | 0.0 | 3798.3             | 708297.7                 |              |                | 195.3        | 36415.2    | 3993.5             | 744712.9    | 898964.0    |           |     |
| AM0062000 | PA MANAQUIRI I -<br>GLEBA 06  | 676.0   | 122986.0  | 0.0 | 0.0 | 2955.6             | 550874.8                 |              |                | 365.8        | 68202.9    | 3321.3             | 619077.7    | 742063.7    |           |     |
| AM0063000 | PA MANAQUIRI II -<br>GLEBA 07 | 1073.1  | 190382.2  | 0.0 | 0.0 | 5244.0             | 976945.4                 |              |                | 468.5        | 87336.1    | 5712.5             | 1064281.4   | 1254663.6   | 0.4       |     |
| AM0064000 | PDS MANDIOCA                  | 3235.0  | 557051.4  | 0.0 | 0.0 | 1639.4             | 301709.6                 |              |                |              |            | 1639.4             | 301709.6    | 858761.0    | 309.4     |     |
| AM0065000 | PAE INAJÁ                     | 2920.1  | 515384.0  | 0.0 | 0.0 | 45457.1            | 8345627.6                | 2046.<br>0   | 358516.8       | 1459.6       | 269637.3   | 48962.7<br>159869. | 8973781.7   | 9489165.7   | 1333.0    |     |
| AM0066000 | PAE ACARÁ                     | 6706.9  | 1240289.5 | 0.0 | 0.0 | 87679.9            | 16349429.6               | 17.0         | 3166.7         | 72173.0      | 13454865.7 | 8                  | 29807461.9  | 31047751.4  | 771.8     |     |
| AM0067000 | PDS RAINHA                    | 1184.5  | 220149.7  | 0.0 | 0.0 | 17895.5            | 3336660.0                |              |                | 614.9        | 114656.0   | 18510.4            | 3451316.0   | 3671465.7   | 18.1      |     |
| AM0068000 | PAE PIRANHA                   | 995.7   | 182156.1  | 0.0 | 0.0 | 28901.5            | 5051364.8                | 5657<br>7.4  | 9842558.4      | 13134.6      | 2298718.0  | 98613.6            | 17192641.2  | 17374797.3  | 1         |     |
| AM0069000 | PAE NOVO JARDIM<br>PDS        | 3139.5  | 572840.6  | 0.0 | 0.0 | 7247.5             | 1350236.3                |              |                | 25024.1      | 4663788.8  | 32271.5            | 6014025.1   | 6586865.6   | 807.5     |     |
| AM0070000 | CUIEIRAS/ANAVILH<br>ANAS      | 1970.9  | 364863.3  | 0.0 | 0.0 | 187951.<br>0       | 35011428.8               |              |                | 83.1         | 15489.1    | 188034.<br>1       | 35026917.9  | 35391781.2  | 1808.7    |     |
| AM0073000 | PAE TERRA FIRME               | 306.6   | 56496.2   | 0.0 | 0.0 | 7053.7             | 1313453.1                |              |                |              |            | 7053.7             | 1313453.1   | 1369949.3   |           |     |
| AM0074000 | PAE ARIPUANÃ-<br>GUARIBA      | 15405.6 | 2691552.5 | 0.0 | 0.0 | 1026435.<br>.3     | 187966567.<br>7          | 3646.<br>0   | 292415.6       |              |            | 1030081.<br>.3     | 188258983.3 | 190950535.8 | 6064.2    |     |
| AM0077700 | PA PANELÃO                    | 1358.6  | 252198.6  | 0.0 | 0.0 | 2374.9<br>192500.  | 442036.1                 | 8506.<br>1   |                | 26.7         | 4983.7     | 2401.6<br>201006.  | 447019.8    | 699218.4    | 284.4     |     |
| AM0080000 | PAE SÃO BENEDITO              | 1066.7  | 154335.5  | 0.0 | 0.0 | 2                  | 33460126.6               | 1805<br>6.0  | 381315.2       |              |            | 3                  | 33841441.8  | 33995777.3  | 862.4     |     |
| AM0081000 | PAE CABALLIANA I              | 20657.6 | 3805336.7 | 0.0 | 0.0 | 38681.2<br>120298. | 6951996.4                |              | 3160108.6      | 2905.8       | 519720.1   | 59643.0<br>157240. | 10631825.1  | 14437161.9  | 7736.3    |     |
| AM0082000 | PAE TUPANA IGAPÓ-<br>AÇU I    | 438.0   | 79606.1   | 0.0 | 0.0 | 9                  | 22062505.4               | 695.5        | 8166.9         | 36246.0      | 6687318.3  | 4                  | 28757990.7  | 28837596.8  | 576.4     |     |
| AM0083000 | PAE PURUS                     | 13200.2 | 2416984.6 | 0.0 | 0.0 | 593009.<br>6       | 105899354.<br>1          | 1143<br>85.6 | 17570467.<br>6 | 42601.9      | 7484734.9  | 749997.<br>1       | 130954556.5 | 133371541.1 | 9         |     |

|           |                                               |         |           |     |     |              |            |            |           |         |           |              |            |            |             |
|-----------|-----------------------------------------------|---------|-----------|-----|-----|--------------|------------|------------|-----------|---------|-----------|--------------|------------|------------|-------------|
| AM0085000 | PDS NOVA<br>ESPERANÇA                         | 293.2   | 54480.4   | 0.0 | 0.0 | 9.7          | 1811.6     |            | 9.2       | 1702.7  | 18.9      | 3514.3       | 57994.7    | 19.9       |             |
| AM0086000 | PDS GEDEÃO                                    | 1671.4  | 294600.9  | 0.0 | 0.0 | 9655.0       | 1701790.5  |            |           |         | 9655.0    | 1701790.5    | 1996391.4  |            |             |
| AM0087000 | PAE MARIPITI                                  | 3146.6  | 504111.0  | 0.0 | 0.0 | 79889.5      | 14575815.4 | 2073.<br>5 | 235250.6  | 34534.6 | 6360341.7 | 7            | 21171407.7 | 21675518.7 | 619.6       |
| AM0089000 | PAE URUAPIARA                                 | 1612.3  | 276913.3  | 0.0 | 0.0 | 38132.7      | 6943310.0  | 799.4      | 22749.3   |         | 38932.2   | 6966059.3    | 7242972.6  | 34.4       |             |
| AM0090000 | PAE SANTA FÉ                                  | 90.7    | 12039.1   | 0.0 | 0.0 | 3743.8       | 418836.7   | 873.7      | 14641.0   |         | 4617.5    | 433477.7     | 445516.8   | 3.9        |             |
| AM0091000 | PAE SÃO JOAQUIM                               | 1395.8  | 249326.1  | 0.0 | 0.0 | 147032.      |            | 3471       |           |         | 181751.   |              |            |            |             |
| AM0092000 | PAE SÃO JOAQUIM<br>PAE FLORESTA DO<br>IPIXUNA | 236.4   | 42958.3   | 0.0 | 0.0 | 2            | 26346681.2 | 9.5        | 3793733.6 |         |           | 7            | 30140414.9 | 30389740.9 | 7452.6      |
| AM0093000 | PAE TUPANA IGAPÓ<br>AÇU II                    | 569.9   | 103802.3  | 0.0 | 0.0 | 8            | 82564974.2 | 25.9       | 4833.1    | 3269.9  | 607622.0  | 7            | 83177429.3 | 83281231.6 | 140.0       |
| AM0094000 | PAE ONÇAS                                     | 93.4    | 16353.4   | 0.0 | 0.0 | 3892.2       | 681128.5   | 4682.<br>4 | 819418.6  |         |           | 8574.6       | 1500547.1  | 1516900.6  | 583.7       |
| AM0095000 | PAE CABALIANA II                              | 3939.0  | 704530.0  | 0.0 | 0.0 | 82071.5      | 14805685.4 | 3758.<br>2 | 657686.7  | 10080.4 | 1857671.0 | 95910.1      | 17321043.2 | 18025573.2 | 14258.<br>8 |
| AM0098000 | PAE BELA VISTA II                             | 14812.7 | 2413658.9 | 0.0 | 0.0 | 13301.5      | 2332752.0  | 7950.<br>2 | 1386234.4 | 228.8   | 40055.7   | 21480.5      | 3759042.1  | 6172701.0  | 23094.<br>6 |
| AM0099000 | PAE NOVO ORIENTE<br>PAE LAGO DO               | 1064.4  | 187614.3  | 0.0 | 0.0 | 17461.0      | 3077391.9  |            |           |         |           | 17461.0      | 3077391.9  | 3265006.2  |             |
| AM0100000 | ACARÁ                                         | 1178.2  | 193673.6  | 0.0 | 0.0 | 105308.<br>5 | 19075216.9 | 960.8      | 124082.1  |         |           | 106269.<br>3 | 19199299.0 | 19392972.5 | 393.9       |
| AM0101000 | PAE RIO AÇUÃ                                  | 952.5   | 167265.3  | 0.0 | 0.0 | 12241.8      | 2145459.0  | 42.9       | 3825.8    |         |           | 12284.8      | 2149284.8  | 2316550.1  |             |
| AM0103000 | PDS REALIDADE<br>PAE SANTA MARIA              | 607.5   | 106966.7  | 0.0 | 0.0 | 42860.0      | 7552131.7  | 320.8      | 56105.7   |         |           | 43180.8      | 7608237.4  | 7715204.1  |             |
| AM0106000 | AUXILIADORA<br>PAE ILHA DO<br>PARANÁ DE       | 359.8   | 62921.3   | 0.0 | 0.0 | 34384.1      | 6050247.6  |            |           |         |           | 34384.1      | 6050247.6  | 6113169.0  | 623.3       |
| AM0107000 | PARINTINS<br>PAE ILHA DO                      | 0.0     | 0.0       | 0.0 | 0.0 |              |            | 715.9      | 8963.4    |         |           | 715.9        | 8963.4     | 8963.4     | 1122.2      |
| AM0108000 | ARAMAÇA                                       | 213.4   | 37344.5   | 0.0 | 0.0 | 6475.5       | 1133207.1  |            |           | 1608.8  | 281539.1  | 8084.3       | 1414746.2  | 1452090.7  | 291.3       |
| AM0109000 | PAE ANUMAÃ<br>PAE LAGO DO SÃO                 | 2207.2  | 407218.0  | 0.0 | 0.0 | 10795.8      | 1960856.1  | 3375.<br>8 | 596586.2  | 9628.2  | 1790248.2 | 23799.7      | 4347690.6  | 4754908.6  | 689.8       |
| AM0110000 | RAFAEL<br>PAE NOVO TEMPO<br>ILHA MARIA        | 98.4    | 17176.4   | 0.0 | 0.0 | 65361.6      | 11530793.8 |            |           | 4769.8  | 843115.9  | 70131.4      | 12373909.7 | 12391086.1 | 351.1       |
| AM0115000 | ANTONIA<br>PAE NOVO TEMPO                     | 0.0     | 0.0       | 0.0 | 0.0 |              |            | 113.5      | 19860.7   |         |           | 113.5        | 19860.7    | 19860.7    | 34.3        |
| AM0116000 | ILHA MURATU<br>PAE NOVO TEMPO                 | 0.0     | 0.0       | 0.0 | 0.0 |              |            | 406.4      | 71128.3   |         |           | 406.4        | 71128.3    | 71128.3    | 134.5       |
| AM0117000 | ILHA JACURUTU<br>PAE NOVO TEMPO               | 0.0     | 0.0       | 0.0 | 0.0 |              |            | 430.9      | 75415.4   |         |           | 430.9        | 75415.4    | 75415.4    | 45.1        |
| AM0118000 | ILHA DA PACIENCIA                             | 0.0     | 0.0       | 0.0 | 0.0 |              |            | 3098.<br>2 | 542177.1  |         |           | 3098.2       | 542177.1   | 542177.1   | 1211.2      |
| AM0119000 | PDS RIO TACANA                                | 368.4   | 64115.2   | 0.0 | 0.0 | 806.0        | 142659.1   |            |           | 2323.9  | 412571.8  | 3129.9       | 555231.0   | 619346.2   |             |
| AM0120000 | PDS SAMAUMA                                   | 680.0   | 122913.1  | 0.0 | 0.0 | 35344.9      | 6452989.5  | 3318.<br>7 | 582859.6  |         |           | 38663.6      | 7035849.1  | 7158762.3  | 1575.9      |

|                 |                                                 |          |             |        |          |                |                   |                     |                |              |             |                |              |              |              |
|-----------------|-------------------------------------------------|----------|-------------|--------|----------|----------------|-------------------|---------------------|----------------|--------------|-------------|----------------|--------------|--------------|--------------|
| AM0121000       | PDS PRIMAVERA<br>PCA SÃO PAULO DE<br>OLIVENÇA   | 164.1    | 29709.0     | 0.0    | 0.0      | 18004.1        | 3243620.6         | 4921.<br>0          | 871293.1       | 324.2        | 59169.7     | 23249.3        | 4174083.4    | 4203792.5    | 168.7        |
| AM0123000       |                                                 | 812.7    | 150667.9    | 0.0    | 0.0      | 1641.9         | 305868.0          | 52.5                | 9686.5         | 382.0        | 71224.4     | 2076.4         | 386778.9     | 537446.8     | 0.6          |
| AM0124000       | PAE ILHA DO BAIXIO<br>PDS COSTA DO<br>CALDEIRÃO | 0.0      | 0.0         | 0.0    | 0.0      |                |                   | 513.6<br>1250.<br>6 | 89885.5        |              |             | 513.6          | 89885.5      | 89885.5      | 101.7        |
| AM0125000       | PDS LAGO DO<br>TUCUNARÉ                         | 328.1    | 59696.3     | 0.0    | 0.0      | 1617.7         | 283970.9          |                     | 223959.8       | 68.0         | 11905.2     | 2936.3         | 519835.8     | 579532.1     | 255.7        |
| AM0126000       |                                                 | 903.6    | 168505.3    | 0.0    | 0.0      | 2468.0         | 460223.4          |                     |                | 231.6        | 43190.8     | 2699.6         | 503414.2     | 671919.5     | 96.7         |
| AM0131000       | PAF RIO IÇÁ<br>PAE VILA ALTEROSA<br>DO JUI      | 486.6    | 85812.7     | 0.0    | 0.0      | 33028.9        | 6097480.2         |                     |                | 13858.4      | 2563960.8   | 46887.3        | 8661441.0    | 8747253.7    | 81.1         |
| AM0132000       |                                                 | 1878.4   | 346805.8    | 0.0    | 0.0      | 27218.8        | 4851191.3         | 0.2                 | 36.6           | 21643.7      | 3878075.1   | 48862.7        | 8729303.0    | 9076108.8    | 3309.5       |
| AM0133000       | PAE GUARANÍ<br>PDS COSTA DO<br>IRANDUBA         | 1972.5   | 365890.1    | 0.0    | 0.0      | 2277.6         | 424586.9          | 305.6               | 3825.9         | 5553.3       | 1035553.1   | 8136.5         | 1463965.8    | 1829855.9    | 8.8          |
| AM0134000       | PDS NOVO<br>REMANSO                             | 177.8    | 31127.9     | 0.0    | 0.0      | 1485.4         | 259956.0          | 920.3               | 161053.8       |              |             | 2405.7         | 421009.9     | 452137.8     | 699.7        |
| AM0135000       |                                                 | 13808.4  | 2558236.6   | 0.0    | 0.0      | 8457.6         | 1575637.7         |                     |                | 136.3        | 25403.8     | 8593.9         | 1601041.5    | 4159278.1    | 374.1        |
| AM0136000       | PDS AMATARÍ<br>PDS COSTA DA<br>CONCEIÇÃO        | 1067.2   | 198168.5    | 0.0    | 0.0      | 2625.1         | 489312.4          |                     |                | 161.6        | 30127.8     | 2786.7         | 519440.2     | 717608.7     |              |
| AM0137000       |                                                 | 3380.6   | 515300.4    | 0.0    | 0.0      | 5868.3         | 986221.5          | 7683.<br>2          | 1136678.8      | 2520.8       | 453251.4    | 16072.3        | 2576151.8    | 3091452.1    | 1153.0       |
| AM0145000       | PDS ITAUBAO                                     | 2799.6   | 484217.9    | 0.0    | 0.0      | 5698.9         | 979360.4          | 5.4                 | 901.0          | 659.3        | 111290.6    | 6363.6         | 1091552.1    | 1575770.0    | 420.6        |
| AM0146000       | PDS LAGO DO MIRA                                | 1586.8   | 294167.5    | 0.0    | 0.0      | 4831.7         | 899579.6          |                     |                | 234.4        | 43630.1     | 5066.1         | 943209.7     | 1237377.2    | 383.9        |
| AM0147000       | PDS BATATA                                      | 161.4    | 30079.0     | 0.0    | 0.0      | 2348.8         | 437978.3          |                     |                |              |             | 2348.8         | 437978.3     | 468057.3     | 145.5        |
| AM0148000       | PAE BAETAS                                      | 3050.9   | 552820.2    | 0.0    | 0.0      | 34194.6        | 6035078.9         | 853.1               | 102257.8       |              |             | 35047.7        | 6137336.7    | 6690157.0    | 296.3        |
| AM0149000       | PAE FORTALEZA                                   | 898.1    | 96928.2     | 0.0    | 0.0      | 25268.9        | 4329201.3         | 412.0               | 33235.1        |              |             | 25680.9        | 4362436.4    | 4459364.7    | 73.6         |
| AM0150000       | PAF CURUQUETE                                   | 1308.1   | 210079.5    | 0.0    | 0.0      | 38691.4        | 6368800.5         | 793.0               | 19858.8        | 112.8        | 19070.1     | 39597.2        | 6407729.4    | 6617808.9    |              |
| AM0151000       | PDS AXINIM                                      | 287.8    | 53224.5     | 0.0    | 0.0      | 6717.5         | 1250406.1         | 298.5               | 53070.4        | 3760.4       | 701238.5    | 10776.4        | 2004715.0    | 2057939.4    |              |
|                 | Total in Amazonas                               | 586891.4 | 104110378.8 | 0.0    | 0.0      | 7129197.<br>.2 | 126574207.<br>7.2 | 3545<br>58.9        | 50493235.<br>9 | 829480.<br>1 | 152246319.8 | 8313236.<br>.2 | 1468481632.8 | 1572592011.7 | 27558<br>6.6 |
| <b>MARANHÃO</b> |                                                 |          | 0.0         | 0.0    | 0.0      |                |                   |                     |                |              |             | 0.0            | 0.0          | 0.0          |              |
| MA0006000       | PIC BARRA DO<br>CORDA                           | 301270.2 | 45142816.7  | 5524.7 | 828682.9 | 29626.7        | 4463342.1         |                     |                | 6599.6       | 996716.5    | 36226.3        | 5460058.7    | 51431558.3   |              |
| MA0008000       | PA OLHO D AGUA<br>DOS GRILOS                    | 811.9    | 120104.4    | 1289.4 | 189543.0 |                |                   |                     |                | 783.9        | 115142.2    | 783.9          | 115142.2     | 424789.6     |              |
| MA0009000       | PA SÃO JOSE DA<br>MATA                          | 1887.8   | 318672.2    | 0.0    | 0.0      |                |                   | 0.6                 | 104.4          |              |             | 0.6            | 104.4        | 318776.6     |              |
| MA0010000       | PA                                              | 4391.3   | 695781.5    | 118.6  | 18248.7  | 1487.2         | 220856.1          | 109.3               | 17766.5        | 2.6          | 436.7       | 1599.1         | 239059.2     | 953089.5     |              |
| MA0011000       | ENTRONCAMENTO<br>PA<br>CLEMENTE/CAJAZEI<br>RAS  | 8742.4   | 1309705.3   | 483.8  | 72475.2  | 2180.5         | 326663.2          |                     |                | 121.6        | 18224.1     | 2302.2         | 344887.3     | 1727067.8    |              |
| MA0012000       | PA MIRA FLORES                                  | 6541.6   | 1210345.7   | 0.0    | 0.0      | 1092.6         | 202909.7          |                     |                | 1539.0       | 284579.8    | 2631.6         | 487489.5     | 1697835.1    |              |

|           |                                    |         |           |        |          |        |          |        |          |        |           |         |           |            |        |
|-----------|------------------------------------|---------|-----------|--------|----------|--------|----------|--------|----------|--------|-----------|---------|-----------|------------|--------|
| MA0013000 | PA MONTE CRISTO/MARMORAN A         | 6683.3  | 903734.6  | 3101.3 | 456173.7 | 0.0    | 2.4      |        |          | 1728.3 | 253886.3  | 1728.3  | 253888.7  | 1613797.0  | 7.9    |
| MA0014000 | PA SÃO JOÃO DAS NEVES              | 1520.2  | 224254.1  | 2620.0 | 384804.6 |        |          |        |          | 8941.0 | 1313077.2 | 8941.0  | 1313077.2 | 1922135.9  |        |
| MA0015000 | PA SANTA TEREZA                    | 1710.8  | 256293.6  | 1429.0 | 214083.5 | 2456.1 | 367951.6 | 1255.1 | 188031.0 |        |           | 3711.3  | 555982.7  | 1026359.8  |        |
| MA0016000 | PA CAMACAOCA                       | 12748.0 | 1837769.2 | 0.0    | 0.0      | 417.9  | 42851.7  | 3451.7 | 107395.1 | 82.1   | 12270.5   | 3951.7  | 162517.3  | 2000286.5  | 3886.2 |
| MA0017000 | PA JITIRANA                        | 2536.4  | 251326.7  | 352.3  | 46599.2  |        |          |        |          | 2311.5 | 291343.6  | 2311.5  | 291343.6  | 589269.5   |        |
| MA0018000 | PA SANTA CRUZ                      | 1273.0  | 202323.7  | 1285.8 | 195875.7 |        |          |        |          | 1486.3 | 218608.9  | 1486.3  | 218608.9  | 616808.3   |        |
| MA0019000 | PA MANGUARY                        | 5725.5  | 865882.5  | 0.0    | 0.0      |        |          |        |          |        |           | 0.0     | 0.0       | 865882.5   | 43.6   |
| MA0020000 | PA KARINÃ                          | 21047.1 | 3550757.2 | 0.0    | 0.0      | 193.6  | 32915.1  |        |          | 28.5   | 4883.5    | 222.1   | 37798.6   | 3588555.8  |        |
| MA0022000 | PA BOM PASTOR                      | 48602.5 | 8995211.8 | 0.0    | 0.0      | 4870.8 | 897770.2 |        |          | 4306.5 | 791845.4  | 9177.3  | 1689615.7 | 10684827.5 |        |
| MA0023000 | PA CUMBIQUE                        | 403.0   | 66510.6   | 0.0    | 0.0      | 285.1  | 46890.7  |        |          |        |           | 285.1   | 46890.7   | 113401.4   | 4.0    |
| MA0026000 | PA BREJO/SÍTIO DO MEIO             | 165.0   | 19949.9   | 672.9  | 52746.7  | 65.5   | 8882.3   | 1545.8 | 121094.0 |        |           | 1611.3  | 129976.3  | 202673.0   |        |
| MA0027000 | PA RIACHUELO                       | 628.6   | 97592.2   | 522.7  | 77594.4  |        |          |        |          | 1204.6 | 177156.4  | 1204.6  | 177156.4  | 352343.0   |        |
| MA0028000 | PA RIO DOCE                        | 24046.3 | 4045620.2 | 0.0    | 0.0      | 1238.4 | 208293.3 | 1331.4 | 240359.7 | 6762.3 | 1138231.1 | 9332.1  | 1586884.0 | 5632504.3  | 392.0  |
| MA0029000 | PA CERES                           | 3142.0  | 514203.2  | 0.0    | 0.0      | 326.1  | 60759.0  |        |          | 445.2  | 82965.2   | 771.3   | 143724.2  | 657927.4   |        |
| MA0030000 | PA EXTRATIVISTA LEITE              | 3022.1  | 419916.6  | 1140.8 | 160012.7 | 3410.2 | 477345.7 |        |          | 1646.7 | 231652.8  | 5056.9  | 708998.4  | 1288927.7  |        |
| MA0031000 | PA BURITI/RIO BONITO               | 28577.4 | 5288555.6 | 0.0    | 0.0      | 2993.8 | 554040.2 |        |          | 261.1  | 48311.1   | 3254.8  | 602351.4  | 5890906.9  |        |
| MA0032000 | PA CITUSA/VIAMÃO                   | 19246.5 | 3566772.1 | 0.0    | 0.0      | 4413.2 | 823059.1 | 3204.6 | 594271.4 | 2737.5 | 511002.5  | 10355.3 | 1928333.0 | 5495105.1  |        |
| MA0033000 | PA ALDEIA                          | 513.9   | 85032.5   | 0.0    | 0.0      |        |          |        |          |        |           | 0.0     | 0.0       | 85032.5    | 0.2    |
| MA0034000 | PA TABOLEIRÃO                      | 2330.5  | 212115.1  | 300.5  | 24959.2  | 1097.0 | 87030.7  |        |          | 4.2    | 321.8     | 1101.1  | 87352.4   | 324426.7   |        |
| MA0035000 | PA REDONDO/ARACANGA                | 739.9   | 106693.0  | 0.0    | 0.0      | 45.9   | 6361.7   | 1298.0 | 31048.2  |        |           | 1343.9  | 37409.9   | 144103.0   | 685.6  |
| MA0036000 | PA PEDRA PRETA/MORRO DOS GARROTOS  | 22020.9 | 3904804.1 | 1.0    | 190.5    | 4440.0 | 829674.8 |        |          | 2848.7 | 532351.1  | 7288.7  | 1362025.9 | 5267020.6  |        |
| MA0037000 | PA SANTA INACIA                    | 19918.5 | 3696812.8 | 0.0    | 0.0      | 625.5  | 116370.9 |        |          | 1127.7 | 209773.4  | 1753.3  | 326144.3  | 4022957.1  |        |
| MA0038000 | PA TRÊS SETUBAL                    | 1285.3  | 188824.0  | 2301.1 | 337843.3 |        |          |        |          | 4067.1 | 597189.5  | 4067.1  | 597189.5  | 1123856.8  |        |
| MA0039000 | PA UNIÃO, PORTUGAL E SANTO ANTONIO | 8478.7  | 1507229.4 | 0.0    | 0.0      | 319.8  | 59189.4  |        |          | 64.0   | 11834.7   | 383.8   | 71024.1   | 1578253.5  |        |
| MA0040000 | PA SANTO ANTONIO DOS VELOSOS       | 712.6   | 104828.0  | 1315.0 | 193433.9 |        |          |        |          | 3071.6 | 451177.6  | 3071.6  | 451177.6  | 749439.5   |        |

|           |                                   |         |           |        |          |        |          |            |          |        |          |        |          |           |        |
|-----------|-----------------------------------|---------|-----------|--------|----------|--------|----------|------------|----------|--------|----------|--------|----------|-----------|--------|
| MA0042000 | PA MARACAÇUMÉ                     | 15967.1 | 2757846.2 | 0.0    | 0.0      | 80.5   | 14897.4  |            |          | 39.7   | 7353.1   | 120.2  | 22250.5  | 2780096.7 |        |
| MA0043000 | PA BENTIVI                        | 537.2   | 6725.8    | 0.0    | 0.0      | 0.9    | 11.4     | 863.8      | 10814.5  |        |          | 864.7  | 10826.0  | 17551.8   |        |
| MA0045000 | PA BITIUA                         | 12873.2 | 2007243.0 | 0.0    | 0.0      | 644.7  | 77774.3  | 11.8       | 1980.0   | 1073.3 | 129521.4 | 1729.9 | 209275.7 | 2216518.7 | 173.7  |
| MA0046000 | PA PAU SANTO                      | 990.7   | 166323.1  | 0.0    | 0.0      |        |          |            |          |        |          | 0.0    | 0.0      | 166323.1  |        |
| MA0047000 | PA TAUÁ/SANTA<br>TEREZINHA        | 183.2   | 30032.0   | 0.0    | 0.0      | 990.8  | 165893.2 |            |          | 247.5  | 41543.8  | 1238.2 | 207436.9 | 237468.9  |        |
| MA0048000 | PA SERRARIA                       | 708.3   | 98099.5   | 0.0    | 0.0      |        |          |            |          |        |          | 0.0    | 0.0      | 98099.5   | 60.0   |
| MA0049000 | PA PARUÁ                          | 5779.9  | 912147.3  | 0.0    | 0.0      | 286.1  | 46699.8  | 2023.<br>6 | 170498.7 | 123.2  | 14503.3  | 2433.0 | 231701.8 | 1143849.2 |        |
| MA0051000 | PA PALMEIRAL<br>VIETNÃ            | 2410.6  | 399862.6  | 97.1   | 16300.3  | 0.0    | 1.2      | 10.5       | 1760.5   | 461.8  | 77532.7  | 472.3  | 79294.4  | 495457.2  |        |
| MA0052000 | PA OURO                           | 3532.9  | 593136.4  | 0.0    | 0.0      | 736.4  | 123626.4 | 0.1        | 12.6     | 156.2  | 26231.7  | 892.7  | 149870.6 | 743007.0  |        |
| MA0053000 | PA<br>GAMELEIRA/MATIES            | 2216.8  | 332091.8  | 289.1  | 43302.8  | 143.5  | 21492.0  | 19.2       | 2873.3   |        |          | 162.6  | 24365.3  | 399759.9  |        |
| MA0054000 | PA BOCAINA                        | 2284.4  | 335376.8  | 358.0  | 52550.9  |        |          |            |          | 135.9  | 19946.3  | 135.9  | 19946.3  | 407874.0  |        |
| MA0055000 | PA ENGENHO<br>CENTRAL/CLARICE     | 4142.9  | 766683.5  | 0.0    | 0.0      |        |          |            |          |        |          | 0.0    | 0.0      | 766683.5  |        |
| MA0057000 | PA SANTA MARIA<br>DOS FERNANDES   | 996.6   | 149478.0  | 1549.1 | 228723.5 |        |          |            |          | 2145.3 | 314945.2 | 2145.3 | 314945.2 | 693146.8  |        |
| MA0058000 | PA CIPÓ CANAÃ                     | 1072.9  | 160738.4  | 0.0    | 0.0      |        |          |            |          |        |          | 0.0    | 0.0      | 160738.4  |        |
| MA0059000 | PA DIAMANTE<br>NEGRO/JUTAHY       | 4297.1  | 667110.3  | 0.0    | 0.0      | 853.1  | 142198.4 | 1333.<br>9 | 95101.5  | 56.1   | 9120.2   | 2243.1 | 246420.1 | 913530.5  | 2387.8 |
| MA0060000 | PA FAZENDA<br>PLANALTO PEDESA     | 16397.9 | 3037751.8 | 0.0    | 0.0      | 253.7  | 47115.9  |            |          | 419.0  | 77894.5  | 672.7  | 125010.3 | 3162762.1 |        |
| MA0061000 | PA COCEIRA/NOVA<br>ALEGRIA        | 1597.4  | 192932.0  | 1257.6 | 156975.0 | 232.9  | 21464.3  | 6960.<br>1 | 405116.4 |        |          | 7192.9 | 426580.7 | 776487.7  |        |
| MA0064000 | PA VILA ESPERANÇA<br>PA           | 1330.8  | 223419.9  | 0.0    | 0.0      | 34.9   | 5867.7   |            |          |        |          | 34.9   | 5867.7   | 229287.6  | 287.7  |
| MA0065000 | PA<br>CACIQUE/TUCUMÃ              | 28842.9 | 5286277.8 | 0.0    | 0.0      | 942.7  | 172832.0 |            |          | 71.8   | 13295.2  | 1014.5 | 186127.2 | 5472405.0 |        |
| MA0066000 | PA ITACIRA                        | 4712.4  | 706514.5  | 31.2   | 4676.7   | 3.4    | 512.3    |            |          | 1.2    | 176.5    | 4.6    | 688.9    | 711880.0  |        |
| MA0068000 | PA SÃO<br>BARTOLOMEU/LUZI         | 6638.7  | 1061178.7 | 0.0    | 0.0      |        |          | 1944.<br>4 | 52414.9  |        |          | 1944.4 | 52414.9  | 1113593.6 |        |
| MA0069000 | PA TRIÂNGULO DE<br>PRATA          | 9081.4  | 1681422.7 | 0.0    | 0.0      | 591.5  | 109822.1 |            |          | 3.3    | 614.2    | 594.8  | 110436.3 | 1791859.1 |        |
| MA0070000 | PA SANTO ANTONIO<br>SEFANS CAREMA | 1091.8  | 180921.5  | 0.5    | 69.2     | 4531.0 | 748388.4 | 1.4        | 234.5    | 1286.2 | 213009.8 | 5818.6 | 961632.6 | 1142623.2 | 5.5    |
| MA0071000 | PA SUMAUMA /<br>JACAMIM           | 6659.1  | 797879.9  | 0.0    | 0.0      |        |          | 187.7      | 2353.7   |        |          | 187.7  | 2353.7   | 800233.6  | 404.0  |
| MA0072000 | PA<br>GALVÃO/CANTANHÊ<br>DE       | 1263.3  | 153005.4  | 906.3  | 109187.1 |        |          |            |          | 3070.2 | 417293.3 | 3070.2 | 417293.3 | 679485.8  | 15.8   |
| MA0073000 | PA TIMBAÚBA                       | 725.0   | 88242.4   | 56.4   | 8110.4   |        |          |            |          | 467.9  | 62427.2  | 467.9  | 62427.2  | 158780.0  |        |

|           |                                    |         |            |        |          |        |           |        |        |        |           |         |           |            |      |
|-----------|------------------------------------|---------|------------|--------|----------|--------|-----------|--------|--------|--------|-----------|---------|-----------|------------|------|
| MA0074000 | PA BAIXÃO<br>PA<br>BARRIGUDA/BAGAC | 428.5   | 62912.3    | 431.0  | 63278.6  |        |           |        |        | 2515.0 | 369222.6  | 2515.0  | 369222.6  | 495413.5   |      |
| MA0075000 | EIRA<br>PA                         | 1709.4  | 97959.9    | 360.3  | 47189.5  |        |           |        |        | 2500.3 | 278515.7  | 2500.3  | 278515.7  | 423665.2   |      |
| MA0076000 | BITUBA/CHAPADA                     | 2861.6  | 468490.9   | 0.0    | 0.0      | 179.5  | 20785.2   |        |        | 2.1    | 225.6     | 181.5   | 21010.8   | 489501.7   | 17.1 |
| MA0083000 | PA SANTA ROSA                      | 2994.6  | 406896.4   | 0.0    | 0.0      | 33.3   | 5584.5    | 139.3  | 5053.7 | 7.1    | 1185.0    | 179.6   | 11823.3   | 418719.7   |      |
| MA0084000 | PA LAGO AZUL                       | 12843.0 | 2303648.4  | 0.0    | 0.0      | 161.0  | 29790.0   |        |        | 11.0   | 2033.0    | 172.0   | 31823.0   | 2335471.5  |      |
| MA0085000 | PA CAJUEIRO                        | 15919.5 | 2946460.9  | 0.0    | 0.0      | 23.1   | 4283.8    |        |        | 13.2   | 2446.1    | 36.4    | 6729.8    | 2953190.7  |      |
| MA0086000 | PA JAPEL                           | 8383.9  | 1346821.9  | 1275.4 | 200065.2 | 715.8  | 108827.2  |        |        | 1848.7 | 267529.5  | 2564.5  | 376356.7  | 1923243.8  | 5.4  |
| MA0087000 | PA TERRA BELA                      | 10716.8 | 1943802.8  | 0.0    | 0.0      | 70.4   | 13029.9   |        |        |        |           | 70.4    | 13029.9   | 1956832.7  | 5.9  |
| MA0088000 | PA SANTA HELENA<br>PA PURÃO DOS    | 62535.7 | 11535381.1 | 0.0    | 0.0      | 2741.6 | 508399.9  |        |        | 5061.1 | 936922.2  | 7802.8  | 1445322.0 | 12980703.1 |      |
| MA0089000 | PIRRÓS                             | 4222.8  | 708972.3   | 0.0    | 0.0      |        |           |        |        |        |           | 0.0     | 0.0       | 708972.3   |      |
| MA0090000 | PA CASTELO<br>PA                   | 3001.8  | 508695.8   | 0.0    | 0.0      |        |           |        |        |        |           | 0.0     | 0.0       | 508695.8   |      |
| MA0091000 | FLORESTAL/MARAC<br>ASSUMÉ          | 35191.7 | 6496053.5  | 0.0    | 0.0      | 5523.2 | 1005662.3 |        |        | 6872.7 | 1253471.7 | 12395.8 | 2259134.0 | 8755187.6  |      |
| MA0092000 | PA SANTO ANTONIO<br>DO RIO CAXIAS  | 5395.5  | 771792.0   | 0.0    | 0.0      |        |           |        |        |        |           | 0.0     | 0.0       | 771792.0   |      |
| MA0093000 | PA BABILÔNIA                       | 2055.1  | 380313.8   | 0.0    | 0.0      | 3.6    | 666.4     |        |        |        |           | 3.6     | 666.4     | 380980.2   |      |
| MA0094000 | PA ALTO ALEGRE<br>PA INDIANA/SANTA | 2879.2  | 445792.2   | 1112.5 | 163556.0 |        |           |        |        | 2192.6 | 321917.1  | 2192.6  | 321917.1  | 931265.3   | 21.0 |
| MA0095000 | MARIA                              | 5090.6  | 942075.4   | 0.0    | 0.0      | 106.8  | 19766.8   |        |        | 6.8    | 1254.9    | 113.6   | 21021.7   | 963097.2   |      |
| MA0109000 | PA LAGE COMPRIDA<br>PA PADRE       | 1445.0  | 18124.1    | 0.0    | 0.0      |        |           | 4973.9 |        |        |           | 4973.9  | 62273.5   | 80397.7    |      |
| MA0110000 | CÍCERO/JASMINA                     | 3703.0  | 660771.2   | 0.0    | 0.0      |        |           |        |        |        |           | 0.0     | 0.0       | 660771.2   |      |
| MA0111000 | PA TRÊS LAGOAS                     | 2687.7  | 498352.8   | 0.0    | 0.0      | 192.6  | 35873.2   |        |        | 365.1  | 67984.0   | 557.7   | 103857.3  | 602210.1   |      |
| MA0112000 | PA CAAC                            | 884.8   | 68338.2    | 44.0   | 3400.5   | 2.5    | 189.6     |        |        |        |           | 2.5     | 189.6     | 71928.2    |      |
| MA0113000 | PA ALVORADA I                      | 6967.8  | 1098975.2  | 0.0    | 0.0      | 209.2  | 21818.0   |        |        | 67.7   | 3514.1    | 276.9   | 25332.1   | 1124307.3  |      |
| MA0114000 | PA ALVORADA II<br>PA SANTA MARIA   | 8149.9  | 1511536.3  | 0.0    | 0.0      | 547.0  | 101933.3  |        |        |        |           | 547.0   | 101933.3  | 1613469.6  |      |
| MA0124000 | DO CAPISTRANO<br>PA                | 909.6   | 152712.5   | 0.0    | 0.0      |        |           |        |        |        |           | 0.0     | 0.0       | 152712.5   |      |
| MA0125000 | CONCEIÇÃO/ARVOR<br>EDO             | 1164.9  | 38430.6    | 55.1   | 1817.0   |        |           |        |        | 177.4  | 5851.3    | 177.4   | 5851.3    | 46098.9    |      |
| MA0126000 | PA PRAZERES                        | 64.8    | 9694.5     | 191.7  | 28275.9  |        |           |        |        | 306.1  | 45961.5   | 306.1   | 45961.5   | 83931.9    |      |
| MA0127000 | PA MACACOS                         | 481.9   | 15897.0    | 2.6    | 85.6     |        |           |        |        | 30.5   | 1005.2    | 30.5    | 1005.2    | 16987.8    |      |

|           |                               |         |           |        |          |        |          |        |          |        |          |         |          |           |
|-----------|-------------------------------|---------|-----------|--------|----------|--------|----------|--------|----------|--------|----------|---------|----------|-----------|
| MA0128000 | PA BATUTA                     | 1708.9  | 316251.6  | 0.0    | 0.0      | 0.7    | 133.2    |        |          |        | 0.7      | 133.2   | 316384.8 |           |
| MA0129000 | PA VERONA                     | 4459.8  | 814298.8  | 0.0    | 0.0      | 0.3    | 3.2      |        |          |        | 0.3      | 3.2     | 814302.1 | 0.0       |
| MA0131000 | PA ALMEIDA MATO GROSSO        | 317.9   | 44724.0   | 164.6  | 23158.2  | 926.2  | 130292.0 |        |          | 107.9  | 15178.8  | 1034.1  | 145470.8 | 213353.0  |
| MA0136000 | PA QUADRA RENASCER II/COLONE  | 152.0   | 28120.6   | 0.0    | 0.0      |        |          |        |          |        | 0.0      | 0.0     | 28120.6  |           |
| MA0139000 | PA VITAL BRASIL               | 1197.9  | 201118.9  | 0.0    | 0.0      |        |          |        |          |        | 0.0      | 0.0     | 201118.9 |           |
| MA0140000 | PA ITAIGUARA                  | 2175.5  | 406237.3  | 0.0    | 0.0      | 115.9  | 21644.9  |        |          |        | 115.9    | 21644.9 | 427882.1 |           |
| MA0141000 | PA BONANZA                    | 401.1   | 67345.6   | 0.0    | 0.0      |        |          |        |          |        | 0.0      | 0.0     | 67345.6  |           |
| MA0143000 | PA TOCANTINS                  | 415.4   | 69743.9   | 0.0    | 0.0      |        |          |        |          |        | 0.0      | 0.0     | 69743.9  |           |
| MA0144000 | PA BOM VIVER                  | 1488.8  | 249957.6  | 0.0    | 0.0      |        |          |        |          |        | 0.0      | 0.0     | 249957.6 |           |
| MA0145000 | PA SANTA MARIA                | 405.3   | 68174.8   | 0.0    | 0.0      | 16.6   | 2790.3   | 955.4  | 169397.7 | 1523.7 | 256322.1 | 2495.7  | 428510.1 | 496684.9  |
| MA0146000 | PA GUARIDA                    | 2511.1  | 464709.6  | 0.0    | 0.0      | 74.7   | 13818.0  |        |          | 18.8   | 3478.3   | 93.5    | 17296.3  | 482005.9  |
| MA0147000 | PA GAMELEIRA                  | 5063.8  | 766828.6  | 0.0    | 0.0      | 471.4  | 77449.8  | 1418.8 | 36622.2  |        |          | 1890.3  | 114072.0 | 880900.6  |
| MA0149000 | PA CAXUXA                     | 1459.9  | 134636.8  | 309.6  | 43870.1  |        |          |        |          | 1588.8 | 206948.9 | 1588.8  | 206948.9 | 385455.7  |
| MA0151000 | PA CIGRA                      | 21442.7 | 3138565.8 | 424.6  | 68394.3  | 1930.2 | 311188.0 |        |          | 297.9  | 51049.9  | 2228.1  | 362238.0 | 3569198.0 |
| MA0153000 | PA OLHO D'ÁGUA DO TURI/COLONE | 1020.2  | 169633.1  | 0.0    | 0.0      |        |          | 154.0  | 14322.6  |        |          | 154.0   | 14322.6  | 183955.6  |
| MA0154000 | PA PAU ROXO/VIGÁRIO           | 1006.3  | 87224.8   | 0.0    | 0.0      |        |          |        |          |        |          | 0.0     | 0.0      | 87224.8   |
| MA0156000 | PA SANTO ANTONIO              | 69.1    | 10324.4   | 3035.0 | 270653.9 | 144.3  | 25689.0  | 2332.1 | 267111.0 |        |          | 2476.5  | 292800.0 | 573778.3  |
| MA0158000 | PA CONCEIÇÃO                  | 1716.9  | 63962.8   | 84.9   | 3593.5   |        |          |        |          | 762.4  | 25896.1  | 762.4   | 25896.1  | 93452.4   |
| MA0159000 | PE VIDÉU                      | 206.6   | 33735.6   | 0.0    | 0.0      | 498.3  | 83181.9  |        |          | 531.0  | 89022.6  | 1029.4  | 172204.4 | 205940.0  |
| MA0161000 | PE SÃO SIMÃO                  | 827.2   | 139080.6  | 0.0    | 0.0      | 1499.5 | 251946.6 |        |          | 127.6  | 21423.9  | 1627.1  | 273370.5 | 412451.1  |
| MA0162000 | PA MATO GROSSO                | 146.1   | 24427.8   | 0.0    | 0.0      |        |          | 1293.7 | 133262.6 |        |          | 1293.7  | 133262.6 | 157690.4  |
| MA0163000 | PA SIT                        | 13435.4 | 2488395.1 | 0.0    | 0.0      | 105.5  | 19537.6  |        |          | 80.0   | 14864.4  | 185.5   | 34402.1  | 2522797.2 |
| MA0166000 | PA NOVO MUNDO/CONQUISTA       | 1854.6  | 346602.9  | 0.0    | 0.0      | 872.8  | 163113.3 |        |          | 539.8  | 100878.3 | 1412.6  | 263991.7 | 610594.6  |
| MA0170000 | PA PAVIO/VARJÃO               | 0.0     | 0.0       | 429.0  | 14151.8  | 0.8    | 125.5    | 2325.8 | 130791.7 |        |          | 2326.7  | 130917.2 | 145069.0  |
| MA0171000 | PA PEDRA DE PAU               | 0.0     | 0.0       | 445.6  | 28091.5  |        |          | 2567.7 | 160196.8 |        |          | 2567.7  | 160196.8 | 188288.3  |
| MA0172000 | PA PALMEIRA/CASTÁLIA          | 5797.3  | 1036791.8 | 0.0    | 0.0      | 64.5   | 9668.1   |        |          | 28.5   | 4272.9   | 93.1    | 13941.0  | 1050732.8 |

|           |                              |         |           |        |          |         |           |        |          |          |        |          |           |
|-----------|------------------------------|---------|-----------|--------|----------|---------|-----------|--------|----------|----------|--------|----------|-----------|
| MA0173000 | PA AÇAI                      | 20133.0 | 3760251.6 | 0.0    | 0.0      | 2373.8  | 443599.2  |        | 914.1    | 170836.7 | 3287.9 | 614435.9 | 4374687.5 |
| MA0174000 | PA BARRA LIMPA               | 1035.4  | 191618.3  | 0.0    | 0.0      |         |           |        |          |          | 0.0    | 0.0      | 191618.3  |
| MA0178000 | PA SÃO PAULO                 | 1207.6  | 177426.9  | 2873.6 | 421868.2 |         |           |        | 2480.6   | 364183.1 | 2480.6 | 364183.1 | 963478.1  |
| MA0179000 | PA FAISA                     | 11373.8 | 2104835.4 | 0.0    | 0.0      | 35.7    | 6608.9    |        | 158.2    | 29281.8  | 193.9  | 35890.6  | 2140726.1 |
| MA0180000 | PA BOQUEIRÃO                 | 428.9   | 62964.8   | 738.7  | 108452.9 |         |           |        | 2112.5   | 310132.9 | 2112.5 | 310132.9 | 481550.6  |
| MA0181000 | PA BAIXÃO DO CEDRO           | 0.0     | 0.0       | 516.8  | 77420.9  |         |           | 1710.3 |          |          |        | 1710.3   | 256227.0  |
| MA0182000 | PA APAGA FOGO                | 131.0   | 21994.8   | 0.0    | 0.0      | 282.1   | 46341.1   |        |          |          |        | 1710.3   | 256227.0  |
| MA0183000 | PA QUADRA SÃO JOÃO           | 861.0   | 144559.8  | 0.0    | 0.0      | 4.1     | 694.4     |        | 0.4      | 64.9     | 4.5    | 759.3    | 145319.0  |
| MA0184000 | PA CACHIMBEIRO               | 7503.2  | 1134132.8 | 389.6  | 59247.4  | 10054.5 | 1512702.4 |        |          |          |        | 12281.7  | 1576350.9 |
| MA0185000 | PE TAIM                      | 77.0    | 11898.8   | 0.0    | 0.0      | 10.2    | 1366.2    |        |          |          | 10.2   | 1366.2   | 13265.0   |
| MA0186000 | PA PORTUGAL                  | 1606.0  | 265476.2  | 0.0    | 0.0      | 241.7   | 28287.6   |        | 44.2     | 5610.4   | 285.9  | 33898.1  | 299374.2  |
| MA0187000 | PA PLANALTO II               | 418.5   | 72056.9   | 0.0    | 0.0      | 9.7     | 1791.2    |        |          |          | 9.7    | 1791.2   | 73848.1   |
| MA0188000 | PA INTERNACIONAL             | 879.5   | 162759.2  | 0.0    | 0.0      | 76.0    | 14069.9   |        |          |          | 76.0   | 14069.9  | 176829.1  |
| MA0189000 | PA OLHO D'ÁGUA DOS CARNEIROS | 250.5   | 42054.6   | 0.0    | 0.0      |         |           | 0.6    | 94.7     |          | 0.6    | 94.7     | 42149.3   |
| MA0190000 | PA AREIAS                    | 216.5   | 36340.4   | 0.0    | 0.0      | 0.3     | 54.4      | 628.6  | 45679.2  |          | 628.9  | 45733.6  | 82074.0   |
| MA0198000 | PA PLANALTO I                | 1194.4  | 221040.0  | 0.0    | 0.0      | 140.9   | 26071.4   |        |          |          | 140.9  | 26071.4  | 247111.4  |
| MA0201000 | PA NOVO ORIENTE              | 1998.9  | 369913.5  | 0.0    | 0.0      | 204.6   | 37859.8   |        |          |          | 204.6  | 37859.8  | 407773.3  |
| MA0202000 | PA CAXIXÍ                    | 0.0     | 0.0       | 255.6  | 39121.1  |         |           | 2731.4 |          |          |        | 2731.4   | 369881.8  |
| MA0203000 | PA PARAISO                   | 752.0   | 110403.7  | 459.8  | 67500.0  |         |           |        | 1841.2   | 270304.1 | 1841.2 | 270304.1 | 448207.8  |
| MA0204000 | PA SANTA AMÉLIA              | 4499.5  | 684809.3  | 379.0  | 57970.6  | 7495.7  | 1145619.7 |        |          |          |        | 8534.6   | 1169359.8 |
| MA0205000 | PA MARACAJÁ III              | 1061.2  | 62988.3   | 255.1  | 31660.4  |         |           |        | 990.5    | 124029.3 | 990.5  | 124029.3 | 218678.0  |
| MA0206000 | PA CENTRO NOVO               | 104.7   | 15364.4   | 120.1  | 17633.1  |         |           |        | 626.3    | 91944.3  | 626.3  | 91944.3  | 124941.8  |
| MA0207000 | PA NOGUEIRA                  | 181.0   | 26577.3   | 710.5  | 104305.7 |         |           |        | 1410.2   | 207024.5 | 1410.2 | 207024.5 | 337907.5  |
| MA0208000 | PA BACURI                    | 235.1   | 34520.7   | 366.8  | 53857.5  |         |           |        | 298.9    | 43876.4  | 298.9  | 43876.4  | 132254.6  |
| MA0209000 | PA MINA DE PRATA             | 1032.0  | 77520.0   | 0.0    | 0.0      | 1.3     | 128.7     | 1305.5 | 22823.9  |          | 1306.9 | 22952.6  | 100472.7  |
| MA0210000 | PA ANDIROBAL                 | 1958.3  | 313626.4  | 0.0    | 0.0      |         |           |        |          |          | 0.0    | 0.0      | 313626.4  |
| MA0212000 | PA JAGUARANA/FLORESTA        | 0.0     | 0.0       | 1257.6 | 184635.5 |         |           | 3350.4 | 491869.2 |          | 3350.4 | 491869.2 | 676504.8  |



|           |                                       |         |           |        |          |        |          |            |           |        |          |           |           |           |
|-----------|---------------------------------------|---------|-----------|--------|----------|--------|----------|------------|-----------|--------|----------|-----------|-----------|-----------|
| MA0213000 | PA LADEIRA<br>VERMELHA COCO<br>GRANDE | 3.6     | 532.8     | 1505.6 | 221031.5 |        |          | 4568.<br>4 | 670681.7  |        | 4568.4   | 670681.7  | 892246.0  |           |
| MA0214000 | PA SANTANA<br>MORRINHOS               | 0.0     | 0.0       | 607.2  | 89137.6  |        |          | 7014.<br>3 | 1029762.2 |        | 7014.3   | 1029762.2 | 1118899.8 |           |
| MA0215000 | PA PREGUIÇA<br>PA QUADRA 10 DE        | 1649.3  | 276905.4  | 0.0    | 0.0      |        |          |            |           |        | 0.0      | 0.0       | 276905.4  |           |
| MA0216000 | AGOSTO<br>PA QUADRA                   | 947.6   | 159096.5  | 0.0    | 0.0      | 38.2   | 6410.6   |            |           |        | 38.2     | 6410.6    | 165507.1  |           |
| MA0217000 | BARRAQUINHA                           | 1136.4  | 190786.6  | 0.0    | 0.0      | 54.2   | 9107.5   |            |           |        | 54.2     | 9107.5    | 199894.1  |           |
| MA0218000 | PA QUADRA UNIÃO                       | 843.2   | 104628.6  | 0.0    | 0.0      |        |          |            |           |        | 0.0      | 0.0       | 104628.6  |           |
| MA0219000 | PA OLHO D ÁGUA                        | 823.1   | 119672.9  | 162.6  | 23345.0  | 467.5  | 66002.3  | 482.4      | 70570.6   | 384.9  | 56175.6  | 1334.7    | 192748.5  | 335766.5  |
| MA0220000 | PA GAIOLA GRANDE                      | 316.1   | 52597.2   | 0.0    | 0.0      | 750.5  | 124269.3 |            |           | 56.2   | 9395.7   | 806.7     | 133665.1  | 186262.2  |
| MA0221000 | PA MARACAJÁ I                         | 2220.6  | 94229.7   | 226.9  | 27961.9  |        |          |            |           | 1159.7 | 119801.6 | 1159.7    | 119801.6  | 241993.2  |
| MA0222000 | PA CALIFORNIA                         | 5822.4  | 1077256.1 | 0.0    | 0.0      | 70.2   | 12983.0  |            |           | 46.8   | 8652.7   | 116.9     | 21635.7   | 1098891.8 |
| MA0223000 | PA FLOR DO VALE                       | 2791.1  | 431188.6  | 0.0    | 0.0      | 191.4  | 30312.5  | 460.3      | 27006.7   | 35.4   | 5942.4   | 687.1     | 63261.6   | 494450.2  |
| MA0225000 | PA OUTEIRO<br>PA BRAÇO<br>GRANDE/LAGO | 18224.9 | 1401475.3 | 0.0    | 0.0      | 589.4  | 105717.7 |            |           | 668.5  | 122807.2 | 1257.9    | 228524.9  | 1630000.2 |
| MA0226000 | AZUL                                  | 2415.5  | 447350.2  | 0.0    | 0.0      | 280.7  | 52055.9  |            |           | 303.2  | 56286.0  | 584.0     | 108341.9  | 555692.1  |
| MA0228000 | PA BOCA DA MATA                       | 2125.9  | 305614.9  | 619.0  | 88258.1  | 2287.3 | 324816.5 | 39.3       | 5720.0    | 295.8  | 41640.5  | 2622.4    | 372176.9  | 766050.0  |
| MA0229000 | PA SÃO PATRÍCIO<br>PA SANTA RITA DOS  | 914.7   | 132431.8  | 400.8  | 54586.0  |        |          |            |           | 194.2  | 19450.6  | 194.2     | 19450.6   | 206468.3  |
| MA0232000 | MATIES                                | 145.5   | 21362.2   | 486.3  | 71400.3  |        |          |            |           | 2086.1 | 306265.3 | 2086.1    | 306265.3  | 399027.8  |
| MA0233000 | PA TABOCÃO                            | 6247.2  | 1167012.9 | 0.0    | 0.0      | 3990.0 | 745687.7 |            |           | 40.4   | 7541.3   | 4030.3    | 753229.1  | 1920242.0 |
| MA0234000 | PA 11 DE JUNHO                        | 6348.4  | 1185775.1 | 0.0    | 0.0      | 2651.6 | 495479.8 |            |           | 87.3   | 16317.0  | 2738.9    | 511796.8  | 1697572.0 |
| MA0235000 | PA 07 DE MAIO                         | 10024.6 | 1871211.1 | 0.0    | 0.0      | 3550.1 | 663460.7 |            |           | 36.4   | 6798.8   | 3586.4    | 670259.5  | 2541470.6 |
| MA0236000 | PA BRASILÂNDIA                        | 6861.6  | 1280919.7 | 0.0    | 0.0      | 4156.5 | 776769.1 |            |           | 44.3   | 8287.1   | 4200.9    | 785056.2  | 2065975.9 |
| MA0237000 | PA PALMARES                           | 0.0     | 0.0       | 801.4  | 112364.6 |        |          | 1337.<br>5 | 191922.4  |        | 1337.5   | 191922.4  | 304286.9  |           |
| MA0239000 | PA GALO                               | 3086.2  | 518145.6  | 0.0    | 0.0      | 394.1  | 66166.5  |            |           |        | 394.1    | 66166.5   | 584312.2  |           |
| MA0240000 | PE REMANSO                            | 1770.2  | 265199.5  | 92.9   | 13912.8  | 90.7   | 13585.0  | 3.2        | 477.8     |        | 93.9     | 14062.7   | 293175.1  |           |
| MA0245000 | PE STA ZITA                           | 456.8   | 76684.2   | 0.0    | 0.0      |        |          |            |           |        | 0.0      | 0.0       | 76684.2   |           |
| MA0248000 | PE QUINTO BRAÇO<br>PE NOVA            | 5071.2  | 938478.6  | 0.0    | 0.0      | 4.0    | 749.3    |            |           | 0.4    | 70.3     | 4.4       | 819.6     | 939298.2  |
| MA0249000 | CONQUISTA<br>PE IGARAPÉ               | 24693.6 | 4570945.3 | 0.0    | 0.0      | 346.3  | 64236.4  |            |           | 606.6  | 112789.9 | 952.9     | 177026.3  | 4747971.6 |
| MA0250000 | GRANDE                                | 15321.2 | 2835347.0 | 0.0    | 0.0      | 39.5   | 7318.9   |            |           | 8.7    | 1612.4   | 48.2      | 8931.4    | 2844278.3 |



|           |                                                  |        |          |        |          |        |            |            |          |        |          |         |          |          |
|-----------|--------------------------------------------------|--------|----------|--------|----------|--------|------------|------------|----------|--------|----------|---------|----------|----------|
| MA0302000 | PA PORCO MORTO<br>PA REGALO/SÃO<br>JOÃO          | 3239.8 | 598222.6 | 0.0    | 0.0      |        |            |            |          |        | 0.0      | 0.0     | 598222.6 |          |
| MA0304000 |                                                  | 0.0    | 0.0      | 167.8  | 24631.1  |        | 2634.<br>8 | 386818.7   |          | 2634.8 | 386818.7 |         | 411449.8 |          |
| MA0306000 | PA MARAVILHA                                     | 816.3  | 122294.3 | 635.2  | 95158.2  | 104.3  | 15620.7    | 524.0      | 78507.7  |        | 628.3    | 94128.4 | 311580.9 |          |
| MA0308000 | PA LAGO DO COCO                                  | 1202.3 | 176505.1 | 62.5   | 9168.9   | 31.9   | 4679.2     |            |          | 78.6   | 11540.0  | 110.5   | 16219.3  | 201893.4 |
| MA0309000 | PA CHAPADINHA<br>PA CONCEIÇÃO DO<br>SALAZAR      | 245.9  | 36818.4  | 1704.7 | 250726.0 | 178.6  | 26752.6    |            |          |        |          | 1488.2  | 215180.7 | 502725.0 |
| MA0310000 |                                                  | 451.8  | 66328.7  | 630.7  | 92598.2  |        |            |            |          | 3223.0 | 473165.7 | 3223.0  | 473165.7 | 632092.6 |
| MA0311000 | PA PONTA DÁGUA                                   | 485.4  | 68265.0  | 173.0  | 13890.9  | 1238.6 | 179690.2   | 3170.<br>1 | 75889.8  |        |          | 4408.7  | 255580.0 | 337736.0 |
| MA0312000 | PA SÃO BENEDITO I<br>PA CIGANA/SANTA<br>CATARINA | 1317.1 | 197470.0 | 0.0    | 0.0      | 12.7   | 1901.6     |            |          | 130.0  | 19479.2  | 142.7   | 21380.7  | 218850.7 |
| MA0314000 |                                                  | 546.1  | 77097.3  | 499.3  | 62962.0  | 31.1   | 4562.2     |            |          | 731.8  | 100350.1 | 762.9   | 104912.3 | 244971.6 |
| MA0315000 | PA ALTA FLORESTA                                 | 888.9  | 164765.9 | 0.0    | 0.0      | 30.0   | 5578.1     |            |          | 77.5   | 14444.0  | 107.5   | 20022.1  | 184788.0 |
| MA0316000 | PA ALVORADA III                                  | 3618.6 | 491022.0 | 0.0    | 0.0      | 36.2   | 3601.7     |            |          |        |          | 36.2    | 3601.7   | 494623.7 |
| MA0317000 | PA JABUTI                                        | 781.6  | 144644.1 | 4.8    | 890.0    | 12.7   | 2342.8     |            |          | 26.5   | 4911.1   | 39.2    | 7253.9   | 152788.1 |
| MA0318000 | PA BOA ESPERANÇA                                 | 988.6  | 182945.1 | 0.0    | 0.0      |        |            |            |          |        |          | 0.0     | 0.0      | 182945.1 |
| MA0319000 | PA JATOBÁ<br>PA CONCEIÇÃO<br>ROSA                | 4938.3 | 913884.7 | 0.0    | 0.0      | 31.8   | 5892.9     |            |          |        |          | 31.8    | 5892.9   | 919777.7 |
| MA0320000 |                                                  | 298.6  | 43843.3  | 224.0  | 32892.0  | 509.8  | 74841.6    | 528.3      | 77560.2  | 112.4  | 16500.7  | 1150.5  | 168902.5 | 245637.7 |
| MA0322000 | PA AGROALEGRE                                    | 2895.2 | 405987.6 | 479.1  | 36250.9  | 0.0    | 2.4        | 98.8       | 8711.2   | 521.6  | 41114.0  | 620.4   | 49827.6  | 492066.2 |
| MA0326000 | PA LAGO VERDE                                    | 190.0  | 17888.7  | 330.3  | 38520.2  |        |            |            |          | 270.5  | 32075.4  | 270.5   | 32075.4  | 88484.4  |
| MA0327000 | PA SÃO BENEDITO                                  | 1718.0 | 269933.9 | 19.9   | 2942.2   | 3474.7 | 547007.6   | 517.1      | 76372.8  | 551.8  | 88013.3  | 4543.6  | 711393.8 | 984269.8 |
| MA0329000 | PCA CAJUÍ                                        | 178.7  | 26232.5  | 39.4   | 5791.0   |        |            |            |          | 0.0    | 0.4      | 0.0     | 0.4      | 32023.9  |
| MA0331000 | PCA INGÁ                                         | 92.8   | 13621.6  | 101.8  | 14942.7  |        |            |            |          | 90.8   | 13331.8  | 90.8    | 13331.8  | 41896.2  |
| MA0333000 | PA BOA UNIÃO                                     | 149.9  | 4952.9   | 30.2   | 4437.8   |        |            | 138.2      | 11908.4  |        |          | 138.2   | 11908.4  | 21299.1  |
| MA0334000 | PA BANDEIRANTES<br>PA ROQUE/SANTA<br>TEREZA      | 1607.8 | 279466.2 | 0.0    | 0.0      | 1196.3 | 202166.6   |            |          | 372.0  | 63116.9  | 1568.2  | 265283.5 | 544749.8 |
| MA0335000 |                                                  | 2602.1 | 436873.0 | 0.0    | 0.0      | 160.9  | 27016.0    |            |          |        |          | 160.9   | 27016.0  | 463889.0 |
| MA0336000 | PA TARUMÃ                                        | 387.4  | 4849.7   | 0.0    | 0.0      | 3.1    | 39.2       | 3360.<br>8 | 42077.1  |        |          | 3363.9  | 42116.4  | 46966.1  |
| MA0337000 | PA BREJO DA ILHA<br>PA ABELARDO<br>RIBEIRO       | 0.0    | 0.0      | 1207.9 | 174326.7 |        |            | 2906.<br>1 | 310969.4 |        |          | 2906.1  | 310969.4 | 485296.1 |
| MA0339000 |                                                  | 3440.3 | 563877.2 | 0.0    | 0.0      | 3.2    | 378.3      | 322.5      | 38595.7  |        |          | 325.7   | 38974.0  | 602851.2 |
| MA0340000 | PA LAGOA SECA<br>PA                              | 240.0  | 28107.5  | 190.2  | 27613.9  |        |            |            |          | 498.7  | 65571.9  | 498.7   | 65571.9  | 121293.3 |
| MA0341000 | CENTRINHO/CARMO                                  | 131.7  | 19332.2  | 168.3  | 24705.7  |        |            |            |          | 258.3  | 37914.9  | 258.3   | 37914.9  | 81952.9  |



|           |                                         |        |           |        |          |        |          |               |          |        |          |        |          |           |       |
|-----------|-----------------------------------------|--------|-----------|--------|----------|--------|----------|---------------|----------|--------|----------|--------|----------|-----------|-------|
| MA0427000 | PA AMOR DA<br>PÁTRIA                    | 194.7  | 29170.4   | 397.5  | 59550.3  | 56.1   | 8398.6   | 530.6         | 79490.3  |        |          | 586.7  | 87888.8  | 176609.6  |       |
| MA0428000 | PA SANTA<br>ANGÉLICA                    | 2622.1 | 485503.8  | 0.0    | 0.0      | 94.0   | 17445.1  |               |          | 132.0  | 24506.1  | 226.0  | 41951.3  | 527455.0  |       |
| MA0429000 | PA SEGUNDA<br>CONQUISTA                 | 403.4  | 67798.5   | 0.0    | 0.0      |        |          | 310.2         | 54363.3  |        |          | 310.2  | 54363.3  | 122161.8  | 6.0   |
| MA0431000 | PA NOSSA SENHORA<br>APARECIDA           | 4089.4 | 720008.7  | 0.0    | 0.0      | 683.3  | 107872.9 |               |          |        |          | 683.3  | 107872.9 | 827881.6  |       |
| MA0432000 | PA RIACHÃO                              | 306.3  | 18797.8   | 0.0    | 0.0      |        |          | 968.9         | 12159.7  |        |          | 968.9  | 12159.7  | 30957.5   | 22.2  |
| MA0433000 | PA SIMAÚMA                              | 103.4  | 15676.9   | 0.0    | 0.0      |        |          | 740.0         | 18484.8  |        |          | 740.0  | 18484.8  | 34161.7   | 102.5 |
| MA0435000 | PA UNIÃO<br>PA TAUÁ DO<br>CENTRO/GAIOLA | 345.2  | 57488.0   | 0.0    | 0.0      | 181.3  | 29775.5  |               |          |        |          | 181.3  | 29775.5  | 87263.4   |       |
| MA0437000 | GRANDE                                  | 56.2   | 9359.7    | 0.0    | 0.0      | 53.5   | 8705.5   | 1476.<br>5    | 184617.1 | 8.4    | 1260.8   | 1538.4 | 194583.4 | 203943.1  | 4.3   |
| MA0438000 | PA PIQUI<br>PCA JOSÉ SARNEY             | 148.1  | 23319.8   | 8.8    | 1299.1   | 276.4  | 42215.2  |               |          |        |          | 276.4  | 42215.2  | 66834.0   | 3.9   |
| MA0440000 | COSTA                                   | 47.5   | 6979.4    | 26.1   | 3834.5   |        |          |               |          | 28.1   | 4130.1   | 28.1   | 4130.1   | 14944.0   |       |
| MA0443000 | PA JORDÃO                               | 1576.9 | 81932.3   | 40.5   | 3157.9   |        |          |               |          | 543.7  | 35289.9  | 543.7  | 35289.9  | 120380.0  |       |
| MA0444000 | PA TERRAS BELAS<br>PA BOA ESPERANÇA     | 444.7  | 63517.6   | 0.0    | 0.0      |        |          | 31.1<br>1928. | 562.3    |        |          | 31.1   | 562.3    | 64079.9   | 45.1  |
| MA0445000 | DOS OLIVEIRAS<br>PA NOSSA SENHORA       | 1161.7 | 190968.6  | 0.0    | 0.0      | 843.9  | 140312.7 | 4             | 76976.0  | 45.5   | 7642.9   | 2817.9 | 224931.6 | 415900.2  | 281.9 |
| MA0447000 | DA CONCEIÇÃO<br>PA                      | 0.0    | 0.0       | 1487.4 | 117820.7 |        |          | 1588.<br>9    | 128453.4 |        |          | 1588.9 | 128453.4 | 246274.1  |       |
| MA0448000 | SULNORBRAZ/AGRO<br>TERRA                | 3531.1 | 657398.2  | 14.2   | 2646.2   | 2057.2 | 384349.0 |               |          | 1509.0 | 281926.0 | 3566.3 | 666275.0 | 1326319.4 |       |
| MA0450000 | PA PLANADA BOA<br>VISTA                 | 449.9  | 83267.7   | 0.0    | 0.0      |        |          |               |          |        |          | 0.0    | 0.0      | 83267.7   |       |
| MA0453000 | PA SAGRADO<br>CORACÃO DE JESUS          | 776.8  | 124535.5  | 0.0    | 0.0      |        |          |               |          |        |          | 0.0    | 0.0      | 124535.5  | 3.5   |
| MA0454000 | PA SÃO JOSÉ DA<br>VITÓRIA               | 573.4  | 20745.7   | 29.1   | 1981.3   |        |          |               |          | 407.4  | 18984.7  | 407.4  | 18984.7  | 41711.7   |       |
| MA0456000 | PA AMAZONIA                             | 3719.5 | 694800.8  | 0.0    | 0.0      | 837.1  | 156436.7 |               |          | 46.7   | 8734.7   | 883.8  | 165171.4 | 859972.2  |       |
| MA0458000 | PE SANTA CLARA                          | 3089.3 | 571712.4  | 0.0    | 0.0      | 163.9  | 30326.3  |               |          |        |          | 163.9  | 30326.3  | 602038.7  |       |
| MA0462000 | PA GURUPI                               | 5673.0 | 1057282.9 | 0.0    | 0.0      | 3071.7 | 572023.7 |               |          | 54.1   | 10076.3  | 3125.8 | 582099.9 | 1639382.8 |       |
| MA0463000 | PA CURITIBA<br>PA FLEXAS/GLEBA          | 0.0    | 0.0       | 1059.1 | 81806.5  |        |          | 488.8         | 37751.3  |        |          | 488.8  | 37751.3  | 119557.8  |       |
| MA0464000 | JURITI                                  | 1702.8 | 317537.2  | 0.0    | 0.0      | 597.4  | 111640.2 |               |          |        |          | 597.4  | 111640.2 | 429177.3  |       |
| MA0468000 | PE MUTUTI                               | 1293.0 | 239280.1  | 0.0    | 0.0      | 4.5    | 831.6    |               |          | 106.1  | 19639.4  | 110.6  | 20471.1  | 259751.2  |       |
| MA0477000 | PE CAJUAL                               | 1511.8 | 279764.9  | 0.0    | 0.0      |        |          |               |          |        |          | 0.0    | 0.0      | 279764.9  |       |
| MA0479000 | PA PAU DE ESTOPA                        | 967.9  | 31930.7   | 5.6    | 184.2    |        |          |               |          | 222.3  | 7332.7   | 222.3  | 7332.7   | 39447.6   |       |

|           |                                             |         |           |        |          |        |          |             |          |        |          |         |           |           |
|-----------|---------------------------------------------|---------|-----------|--------|----------|--------|----------|-------------|----------|--------|----------|---------|-----------|-----------|
| MA0480000 | PA SERAFIM                                  | 0.0     | 0.0       | 766.8  | 112573.3 |        |          | 516.2       | 75780.4  |        | 516.2    | 75780.4 | 188353.7  |           |
| MA0481000 | PA FLORESTA I                               | 1209.3  | 184660.2  | 104.0  | 15871.1  | 54.5   | 8338.6   |             |          | 13.6   | 2072.3   | 68.1    | 10410.8   | 210942.2  |
| MA0483000 | PA CAJUEIRO I                               | 690.3   | 126700.4  | 92.0   | 16020.0  | 93.0   | 16705.3  | 451.9       | 27553.7  |        |          | 544.9   | 44259.0   | 186979.3  |
| MA0484000 | PA SÃO RAIMUNDO<br>PE SITIO DOS             | 7311.2  | 1365665.4 | 0.0    | 0.0      | 2553.4 | 477157.9 |             |          |        |          | 2553.4  | 477157.9  | 1842823.3 |
| MA0485000 | ARRUDAS                                     | 0.0     | 0.0       | 187.8  | 4821.2   |        |          | 1269<br>2.1 | 283205.7 |        |          | 12692.1 | 283205.7  | 288026.9  |
| MA0486000 | PE MUCUNÃ                                   | 530.1   | 79415.4   | 159.1  | 23829.4  | 257.9  | 38642.4  | 935.0       | 140071.3 |        |          | 1192.9  | 178713.7  | 281958.5  |
| MA0489000 | PA DURVAL NETO<br>PA SANTO ANTONIO          | 1342.3  | 197913.3  | 91.3   | 13532.6  | 367.1  | 54797.1  | 542.7       | 78034.2  |        |          | 909.8   | 132831.3  | 344277.2  |
| MA0490000 | II                                          | 800.5   | 123662.5  | 312.3  | 46152.5  | 1271.0 | 198411.1 | 546.6       | 80289.5  |        |          | 1817.6  | 278700.6  | 448515.6  |
| MA0493000 | PA NOVA VIDA<br>PA CHICO<br>MENDES/BANANEIR | 2455.8  | 93801.2   | 781.0  | 32609.9  |        |          |             |          | 905.3  | 54840.5  | 905.3   | 54840.5   | 181251.6  |
| MA0502000 | AS                                          | 4778.8  | 808633.9  | 0.0    | 0.0      | 845.4  | 157372.1 |             |          |        |          | 845.4   | 157372.1  | 966006.0  |
| MA0503000 | PA SANTA LUZIA                              | 2474.0  | 327406.0  | 115.3  | 14784.1  | 54.1   | 4788.2   | 23.8        | 2887.7   |        |          | 77.9    | 7675.9    | 349866.0  |
| MA0504000 | PA BOA VISTA I                              | 0.0     | 0.0       | 1308.4 | 101058.4 |        |          |             |          |        |          | 983.9   | 75997.2   | 177055.6  |
| MA0507000 | PA ORCAISA                                  | 619.4   | 90949.2   | 630.3  | 92541.2  |        |          |             |          | 2867.0 | 420924.8 | 2867.0  | 420924.8  | 604415.2  |
| MA0508000 | PA CASA BRANCA                              | 1163.7  | 190628.0  | 0.0    | 0.0      | 837.7  | 136527.7 |             |          | 45.2   | 7361.2   | 882.9   | 143888.9  | 334516.9  |
| MA0510000 | PA VENEZA                                   | 275.7   | 51534.3   | 0.0    | 0.0      | 104.9  | 19604.9  |             |          |        |          | 104.9   | 19604.9   | 71139.3   |
| MA0511000 | PA SANTA ISABEL                             | 2164.6  | 404488.0  | 0.0    | 0.0      | 477.5  | 89238.2  |             |          |        |          | 477.5   | 89238.2   | 493726.2  |
| MA0512000 | PE JUÇARAL                                  | 37.6    | 5295.3    | 72.9   | 10250.5  | 131.5  | 18496.6  |             |          | 122.0  | 17169.8  | 253.5   | 35666.4   | 51212.2   |
| MA0520000 | PA SOSSEGO                                  | 197.1   | 28938.9   | 433.2  | 63600.8  |        |          |             |          | 1113.9 | 163538.4 | 1113.9  | 163538.4  | 256078.1  |
| MA0521000 | PA TINGIDOR<br>PA LAGO DA                   | 657.2   | 110337.3  | 0.0    | 0.0      | 3168.7 | 531992.3 |             |          | 1225.3 | 205715.9 | 4394.0  | 737708.2  | 848045.5  |
| MA0523000 | CARNAÚBA<br>PA NOVA                         | 9250.1  | 1512765.8 | 0.0    | 0.0      |        |          |             |          |        |          | 0.0     | 0.0       | 1512765.8 |
| MA0524000 | SALVAÇÃO<br>PA ROSELI                       | 1308.1  | 193895.8  | 857.0  | 126939.2 |        |          |             |          | 3389.8 | 497293.4 | 3389.8  | 497293.4  | 818128.4  |
| MA0526000 | NUNES/BANANEIRA<br>S                        | 4359.3  | 810835.8  | 0.0    | 0.0      | 1950.0 | 352173.2 |             |          |        |          | 1950.0  | 352173.2  | 1163009.0 |
| MA0530000 | PA SÃO JOÃO                                 | 0.0     | 0.0       | 229.5  | 17727.3  |        |          | 793.2       | 61266.4  |        |          | 793.2   | 61266.4   | 78993.6   |
| MA0538000 | PE VERA CRUZ I                              | 4944.5  | 915045.2  | 0.0    | 0.0      | 1511.8 | 277181.8 |             |          | 3978.9 | 736943.0 | 5490.8  | 1014124.9 | 1929170.1 |
| MA0539000 | PCA BATALHA                                 | 218.4   | 17985.0   | 2.2    | 169.2    |        |          |             |          |        |          | 0.0     | 0.0       | 18154.1   |
| MA0540000 | PA CIPOAL                                   | 20176.8 | 3735820.4 | 0.0    | 0.0      | 1440.8 | 268322.2 |             |          | 2495.6 | 464322.6 | 3936.4  | 732644.8  | 4468465.1 |
| MA0541000 | PA JAGUARIBE                                | 1939.4  | 329508.4  | 0.0    | 0.0      |        |          |             |          |        |          | 0.0     | 0.0       | 329508.4  |

|           |                                              |         |           |       |          |        |          |            |          |        |          |        |          |           |      |
|-----------|----------------------------------------------|---------|-----------|-------|----------|--------|----------|------------|----------|--------|----------|--------|----------|-----------|------|
| MA0542000 | PE MANAUS<br>PA QUADRA BOA<br>VIDA           | 2875.5  | 532370.6  | 0.0   | 0.0      | 133.0  | 24615.3  |            |          | 129.6  | 24009.6  | 262.6  | 48625.0  | 580995.5  |      |
| MA0546000 |                                              | 297.7   | 49974.6   | 0.0   | 0.0      | 19.8   | 3327.4   |            |          |        |          | 19.8   | 3327.4   | 53302.0   |      |
| MA0548000 | PA VERA CRUZ                                 | 868.2   | 127463.1  | 803.4 | 116621.9 | 237.0  | 34798.5  | 1945.<br>9 | 192398.8 |        |          | 2182.9 | 227197.3 | 471282.4  | 24.4 |
| MA0549000 | PA SÃO FÉLIX                                 | 699.1   | 102641.5  | 324.5 | 47645.3  | 224.1  | 32893.6  | 260.0      | 38168.3  |        |          | 484.0  | 71061.9  | 221348.7  |      |
| MA0553000 | PCA VASSORAL                                 | 114.2   | 19170.8   | 0.0   | 0.0      |        |          |            |          |        |          | 0.0    | 0.0      | 19170.8   |      |
| MA0555000 | PA XIXANDÁ                                   | 1950.9  | 310822.7  | 0.0   | 0.0      | 161.7  | 24526.7  | 1383.<br>3 | 146921.7 |        |          | 1544.9 | 171448.5 | 482271.1  |      |
| MA0557000 | PA BOI BAIANO                                | 2126.7  | 303162.0  | 222.8 | 32631.5  | 0.0    | 2.0      |            |          | 269.2  | 39514.5  | 269.2  | 39516.6  | 375310.0  | 54.3 |
| MA0562000 | PA CIGANA<br>PA PADRE<br>TRINDADE            | 193.2   | 28359.7   | 280.4 | 41172.3  | 900.9  | 132259.5 | 1370.<br>0 | 201132.2 | 66.6   | 9778.7   | 2337.5 | 343170.4 | 412702.4  |      |
| MA0565000 | PA NOVO<br>HORIZONTE II                      | 150.3   | 15791.4   | 255.9 | 34965.7  |        |          |            |          | 1036.1 | 130443.7 | 1036.1 | 130443.7 | 181200.8  |      |
| MA0566000 |                                              | 241.9   | 40613.6   | 0.0   | 0.0      |        |          |            |          |        |          | 0.0    | 0.0      | 40613.6   |      |
| MA0570000 | PA PADRE JOSINO                              | 549.8   | 77342.9   | 137.1 | 19281.2  | 427.0  | 60076.1  |            |          | 131.8  | 18545.9  | 558.9  | 78622.0  | 175246.1  |      |
| MA0572000 | PA ANGICO<br>PA MARGARIDA                    | 0.0     | 0.0       | 110.9 | 16275.8  |        |          | 3143.<br>1 | 463672.2 |        |          | 3143.1 | 463672.2 | 479948.0  |      |
| MA0573000 | MARIA ALVES<br>PA LAGOA DA<br>FORTUNA        | 1.2     | 95.8      | 785.1 | 60644.4  |        |          | 626.0      | 48351.7  |        |          | 626.0  | 48351.7  | 109091.9  |      |
| MA0574000 |                                              | 13964.7 | 2088807.3 | 837.5 | 125409.7 | 5287.6 | 791427.0 | 220.9      | 33088.4  |        |          | 5508.5 | 824515.5 | 3038732.4 |      |
| MA0577000 | PA SARAMANDAIA                               | 1439.0  | 214666.7  | 261.0 | 37991.2  | 47.0   | 6912.3   | 4.2        | 391.7    | 52.0   | 7499.4   | 103.3  | 14803.4  | 267461.4  |      |
| MA0580000 | PA PADRE JOSIMO I<br>PA BOA ESPERANÇA<br>III | 1207.2  | 223413.0  | 0.0   | 0.0      |        |          |            |          |        |          | 0.0    | 0.0      | 223413.0  |      |
| MA0581000 |                                              | 3570.5  | 665209.8  | 0.0   | 0.0      | 979.4  | 182965.9 |            |          |        |          | 979.4  | 182965.9 | 848175.7  |      |
| MA0583000 | PA COCALINHO                                 | 718.9   | 133040.1  | 0.0   | 0.0      |        |          |            |          |        |          | 0.0    | 0.0      | 133040.1  |      |
| MA0584000 | PA QUIXABA                                   | 498.1   | 84536.1   | 0.0   | 0.0      |        |          |            |          |        |          | 0.0    | 0.0      | 84536.1   |      |
| MA0592000 | PA ALVORADA IV                               | 3442.0  | 636163.2  | 0.0   | 0.0      | 2.2    | 401.0    |            |          |        |          | 2.2    | 401.0    | 636564.2  |      |
| MA0593000 | PE MARACUJÁ                                  | 207.3   | 34529.0   | 0.0   | 0.0      | 49.2   | 7415.5   |            |          | 88.1   | 13713.3  | 137.3  | 21128.7  | 55657.7   |      |
| MA0600000 | PE LARANJAL                                  | 961.9   | 161494.0  | 0.0   | 0.0      |        |          |            |          |        |          | 0.0    | 0.0      | 161494.0  |      |
| MA0602000 | PE PROMISSÃO                                 | 179.7   | 27257.5   | 0.0   | 0.0      |        |          |            |          |        |          | 0.0    | 0.0      | 27257.5   |      |
| MA0603000 | PE RIO GRANDE                                | 273.5   | 45912.5   | 0.0   | 0.0      | 43.9   | 7368.9   |            |          | 33.8   | 5673.9   | 77.7   | 13042.8  | 58955.3   |      |
| MA0604000 | PA CANAÃ                                     | 837.3   | 143114.7  | 0.0   | 0.0      |        |          |            |          |        |          | 0.0    | 0.0      | 143114.7  |      |
| MA0605000 | PA BOA VISTA II                              | 595.4   | 108232.5  | 0.0   | 0.0      |        |          |            |          |        |          | 0.0    | 0.0      | 108232.5  |      |
| MA0606000 | PA EL BETEL<br>PA CRUZEIRO DO<br>SUL         | 311.5   | 57304.6   | 0.0   | 0.0      |        |          |            |          |        |          | 0.0    | 0.0      | 57304.6   |      |
| MA0607000 |                                              | 1000.1  | 167108.0  | 0.0   | 0.0      | 112.9  | 17950.4  |            |          |        |          | 112.9  | 17950.4  | 185058.3  |      |

|           |                                     |        |           |        |          |        |          |       |          |       |         |          |           |          |
|-----------|-------------------------------------|--------|-----------|--------|----------|--------|----------|-------|----------|-------|---------|----------|-----------|----------|
| MA0608000 | PA 1    DE JUNHO                    | 286.4  | 48090.7   | 0.0    | 0.0      | 0.1    | 22.5     |       |          |       | 0.1     | 22.5     | 48113.2   |          |
| MA0609000 | PA SUCESSO                          | 420.6  | 77841.3   | 0.0    | 0.0      |        |          |       |          |       | 0.0     | 0.0      | 77841.3   |          |
| MA0610000 | PA IPIRANGA                         | 202.0  | 37382.1   | 0.0    | 0.0      |        |          |       |          |       | 0.0     | 0.0      | 37382.1   |          |
| MA0611000 | PA MONTE LÍRIO                      | 692.4  | 128135.8  | 0.0    | 0.0      |        |          |       |          |       | 0.0     | 0.0      | 128135.8  |          |
| MA0612000 | PA TAMANDARÉ                        | 462.6  | 77950.5   | 0.0    | 0.0      |        |          |       |          |       | 0.0     | 0.0      | 77950.5   |          |
| MA0614000 | PA FÉ EM DEUS<br>PA BOA ESPERANÇA   | 584.0  | 98047.4   | 0.0    | 0.0      |        |          |       |          |       | 0.0     | 0.0      | 98047.4   |          |
| MA0615000 | I                                   | 897.5  | 150675.6  | 0.0    | 0.0      |        |          |       |          |       | 0.0     | 0.0      | 150675.6  |          |
| MA0618000 | PA VALE DO IPÊ                      | 355.6  | 61090.2   | 0.0    | 0.0      | 22.7   | 3729.3   |       |          |       | 22.7    | 3729.3   | 64819.5   |          |
| MA0619000 | PA ALTO BOA VISTA<br>PA SACO DANTAS | 1652.1 | 307334.1  | 0.0    | 0.0      | 360.5  | 67368.8  |       |          | 93.1  | 17403.0 | 453.6    | 84771.8   | 392106.0 |
| MA0633000 | GUARIBAS                            | 2017.9 | 295695.0  | 19.2   | 2751.1   | 0.8    | 115.2    | 215.6 | 31647.6  | 647.3 | 94272.8 | 863.6    | 126035.6  | 424481.7 |
| MA0634000 | PA TICO TICO                        | 187.3  | 27499.9   | 26.9   | 3945.3   | 2.2    | 315.8    |       |          | 116.3 | 17079.8 | 118.5    | 17395.7   | 48840.8  |
| MA0635000 | PA 6 DE MARÇO                       | 314.1  | 58133.0   | 0.0    | 0.0      |        |          |       |          |       | 0.0     | 0.0      | 58133.0   |          |
| MA0640000 | PA REFUGIO                          | 2323.7 | 390112.4  | 0.0    | 0.0      | 437.1  | 73388.4  | 7.4   | 908.4    |       | 444.6   | 74296.8  | 464409.2  | 759.5    |
| MA0642000 | PA ALTAMIRA                         | 0.0    | 0.0       | 1861.2 | 268141.1 |        |          | 1425. |          |       | 1425.1  | 209192.5 | 477333.5  |          |
| MA0644000 | PA SOL NASCENTE<br>PA GOVERNADOR    | 0.0    | 0.0       | 1157.8 | 81409.4  |        |          | 1     | 209192.5 |       | 1996.   | 137154.5 | 218563.9  |          |
| MA0645000 | LUIS ROCHA<br>PA ÁGUA FRIA DO       | 0.0    | 0.0       | 1374.9 | 105238.3 |        |          | 7     | 146364.3 |       | 1981.   | 146364.3 | 251602.6  |          |
| MA0646000 | ITINGA                              | 6291.0 | 1047235.9 | 0.0    | 0.0      | 1150.2 | 187479.2 | 5     |          |       | 1981.5  | 146364.3 | 251602.6  |          |
| MA0647000 | PA AGRÍCOLA 2002                    | 2470.3 | 442066.7  | 0.0    | 0.0      | 2.8    | 440.6    | 946.2 | 116937.6 | 30.7  | 4940.4  | 979.7    | 122318.5  | 564385.2 |
| MA0648000 | PA PIMENTA<br>PA QUADRA             | 281.6  | 52115.8   | 0.0    | 0.0      |        |          |       |          |       | 0.0     | 0.0      | 52115.8   |          |
| MA0649000 | DIAMANTE                            | 102.0  | 17132.5   | 0.0    | 0.0      |        |          |       |          |       | 0.0     | 0.0      | 17132.5   |          |
| MA0650000 | PA BELÉM                            | 590.7  | 99169.2   | 0.0    | 0.0      |        |          |       |          |       | 0.0     | 0.0      | 99169.2   |          |
| MA0651000 | PA CUTIA/BAIÚNA                     | 5487.7 | 1011494.4 | 0.0    | 0.0      |        |          |       |          |       | 0.0     | 0.0      | 1011494.4 |          |
| MA0654000 | PA VALE DO BEKAA                    | 1002.8 | 50729.0   | 40.7   | 2053.9   |        |          |       |          | 253.9 | 18206.1 | 253.9    | 18206.1   | 70988.9  |
| MA0655000 | PA BURITIATÁ                        | 858.4  | 141740.1  | 0.0    | 0.0      | 15.1   | 2535.1   |       |          |       | 15.1    | 2535.1   | 144275.2  |          |
| MA0656000 | PE BOCAINA                          | 521.7  | 76585.8   | 62.3   | 9139.4   |        |          |       |          | 1.3   | 191.4   | 1.3      | 191.4     | 85916.6  |
| MA0660000 | PE BACURITUBA I                     | 0.0    | 0.0       | 0.0    | 0.0      |        |          | 167.5 | 20519.1  |       | 167.5   | 20519.1  | 20519.1   |          |
| MA0666000 | PA DEUS É FIEL                      | 1119.2 | 190724.5  | 0.0    | 0.0      | 216.6  | 7022.5   |       |          |       | 216.6   | 7022.5   | 197747.0  |          |
| MA0668000 | PA EL SHADAY                        | 877.9  | 158161.4  | 0.0    | 0.0      | 110.6  | 9129.1   |       |          |       | 110.6   | 9129.1   | 167290.5  |          |



|           |                             |        |          |         |          |        |          |        |        |          |        |           |           |
|-----------|-----------------------------|--------|----------|---------|----------|--------|----------|--------|--------|----------|--------|-----------|-----------|
| MA0685000 | PA QUADRA SÃO JOÃO BATISTA  | 189.4  | 31797.3  | 0.0     | 0.0      |        |          |        |        | 0.0      | 0.0    | 31797.3   |           |
| MA0686000 | PA QUADRA SÃO RAIMUNDO      | 203.7  | 34192.8  | 0.0     | 0.0      |        |          |        |        | 0.0      | 0.0    | 34192.8   |           |
| MA0688000 | PE LARANJEIRAS / MURTURA    | 101.1  | 16562.3  | 0.0     | 0.0      | 12.3   | 1898.9   |        | 6.8    | 1145.5   | 19.1   | 3044.5    | 19606.7   |
| MA0692000 | PA PAULO FREIRE             | 0.0    | 0.0      | 196.8   | 28859.9  |        |          | 1136.1 |        |          |        | 139776.2  | 168636.1  |
| MA0698000 | PA VITÓRIA                  | 0.0    | 0.0      | 606.7   | 61046.9  |        |          | 698.7  |        |          |        | 67737.0   | 128783.9  |
| MA0699000 | PA NOVA VITÓRIA             | 0.0    | 0.0      | 399.0   | 7221.9   |        |          | 155.9  |        |          |        | 7283.4    | 14505.3   |
| MA0700000 | PA PASSO LIVRE              | 2353.8 | 439909.1 | 0.0     | 0.0      | 3289.9 | 614850.9 |        | 9.5    | 1768.4   | 3299.4 | 616619.3  | 1056528.4 |
| MA0701000 | PA MINADOR                  | 0.1    | 9.8      | 381.9   | 56194.4  |        |          | 1049.5 |        |          |        | 155789.1  | 211993.3  |
| MA0704000 | PA 17 DE ABRIL              | 0.0    | 0.0      | 162.0   | 21723.2  |        |          | 1138.3 |        |          |        | 77863.5   | 99586.6   |
| MA0725000 | PA FELIZ SÃO FRANCISCO      | 257.8  | 43282.9  | 0.0     | 0.0      |        |          |        |        |          |        | 0.0       | 43282.9   |
| MA0726000 | PA BOM JESUS II             | 364.5  | 53517.5  | 141.5   | 20779.9  | 629.7  | 92445.0  | 284.6  |        |          |        | 41778.6   | 208521.1  |
| MA0727000 | PA SÃO VICENTE              | 219.8  | 40674.7  | 0.0     | 0.0      |        |          |        |        |          |        | 0.0       | 40674.7   |
| MA0729000 | PA BEBE ÁGUA                | 239.4  | 40200.8  | 0.0     | 0.0      |        |          |        |        |          |        | 0.0       | 40200.8   |
| MA0730000 | PA TRÊS PALMEIRAS           | 201.2  | 33781.7  | 0.0     | 0.0      | 4.3    | 725.8    |        |        |          |        | 4.3       | 34507.5   |
| MA0746000 | PE BURITIRANA I             | 0.0    | 0.0      | 15417.9 | 729958.2 |        |          | 4338.0 |        |          |        | 1141540.5 | 1871498.7 |
| MA0747000 | PA RAIMUNDO PANELADA/SIMASA | 5345.1 | 989164.8 | 0.0     | 0.0      | 1483.6 | 274554.9 |        | 166.4  | 30792.6  | 1650.0 | 305347.5  | 1294512.3 |
| MA0748000 | PA SÃO JOÃO I               | 771.1  | 123328.3 | 0.0     | 0.0      | 5.9    | 880.8    |        | 38.1   | 5711.4   | 44.0   | 6592.2    | 129920.5  |
| MA0749000 | PA IMPERIAL                 | 2472.7 | 370432.1 | 5.5     | 817.3    | 24.6   | 3680.0   |        |        |          |        | 24.6      | 374929.4  |
| MA0756000 | PA OLGA BENÁRIO             | 0.0    | 0.0      | 877.8   | 76903.9  |        |          | 1777.1 |        |          |        | 192930.3  | 269834.2  |
| MA0757000 | PA SÃO RAIMUNDO II          | 710.5  | 104314.4 | 20.0    | 2941.4   |        |          |        | 294.3  | 43209.0  | 294.3  | 43209.0   | 150464.7  |
| MA0758000 | PA JEOVAH                   | 3174.8 | 533016.7 | 0.0     | 0.0      |        |          |        |        |          |        | 0.0       | 533016.7  |
| MA0767000 | PA BRASILÂNDIA I            | 3176.9 | 165305.0 | 91.0    | 10095.7  |        |          |        | 963.8  | 103468.7 | 963.8  | 103468.7  | 278869.4  |
| MA0768000 | PA SÃO JOSÉ / SATUBINHA     | 626.2  | 91538.6  | 0.0     | 0.0      |        |          | 1380.8 |        |          |        | 27987.8   | 119526.4  |
| MA0769000 | PA SÃO BENEDITO DO ELCIAS   | 303.5  | 45146.0  | 272.1   | 40015.0  |        |          |        | 495.4  | 72829.8  | 495.4  | 72829.8   | 157990.8  |
| MA0771000 | PA PADRE PAULO              | 3515.5 | 583119.2 | 0.0     | 0.0      | 179.2  | 23037.7  | 6.7    | 1118.6 | 23.7     | 3202.1 | 209.5     | 610477.6  |
| MA0772000 | PA LAGOA DOS PATOS          | 1088.8 | 202276.3 | 0.0     | 0.0      | 177.4  | 33017.9  |        | 446.7  | 83157.7  | 624.1  | 116175.7  | 318451.9  |
| MA0773000 | PA DALBAM                   | 2471.5 | 414944.3 | 0.0     | 0.0      |        |          |        |        |          |        | 0.0       | 414944.3  |

|           |                                                                       |         |           |        |          |        |          |        |          |        |          |        |          |           |
|-----------|-----------------------------------------------------------------------|---------|-----------|--------|----------|--------|----------|--------|----------|--------|----------|--------|----------|-----------|
| MA0775000 | PA VIDA NOVA                                                          | 0.0     | 0.0       | 1360.1 | 56405.7  |        |          | 4939.1 | 358440.5 |        |          | 4939.1 | 358440.5 | 414846.1  |
| MA0782000 | PA MANGAUBA                                                           | 165.3   | 27689.3   | 0.0    | 0.0      | 116.1  | 18576.5  | 3.2    | 200.7    | 17.3   | 2912.8   | 136.7  | 21690.0  | 49379.3   |
| MA0783000 | PA CIGANA/BARRIGUD<br>O/COLONE                                        | 144.1   | 24189.0   | 0.0    | 0.0      | 25.0   | 4201.0   |        |          |        |          | 25.0   | 4201.0   | 28390.0   |
| MA0800000 | PA MUNDO NOVO                                                         | 0.0     | 0.0       | 242.3  | 35577.4  |        |          | 1299.5 | 190775.7 |        |          | 1299.5 | 190775.7 | 226353.1  |
| MA0820000 | PE BOA VISTA III                                                      | 4378.7  | 743310.6  | 0.0    | 0.0      | 234.2  | 27018.5  |        |          | 190.3  | 23533.1  | 424.6  | 50551.6  | 793862.2  |
| MA0821000 | PE ENCRUSO                                                            | 366.3   | 61502.9   | 0.0    | 0.0      | 3023.2 | 507566.2 | 177.4  | 29788.5  | 804.7  | 135105.1 | 4005.4 | 672459.8 | 733962.6  |
| MA0834000 | PA MONTE CRISTO                                                       | 2574.4  | 389183.8  | 821.2  | 121785.8 |        |          |        |          | 3792.7 | 558788.3 | 3792.7 | 558788.3 | 1069757.9 |
| MA0835000 | PA TAMBOR<br>CENTRO VELHO                                             | 3268.9  | 511111.1  | 0.0    | 0.0      | 8.9    | 1249.2   | 5186.0 | 422617.9 |        |          | 5194.9 | 423867.0 | 934978.1  |
| MA0836000 | PA DEUS PROTEJA<br>PA BARROCA DOS<br>VEADOS                           | 1619.1  | 300876.1  | 0.0    | 0.0      | 651.7  | 121790.6 |        |          |        |          | 651.7  | 121790.6 | 422666.7  |
| MA0840000 |                                                                       | 474.8   | 22395.4   | 19.7   | 1765.3   |        |          |        |          | 703.7  | 60056.5  | 703.7  | 60056.5  | 84217.2   |
| MA0842000 | PA SÃO FRANCISCO I                                                    | 1154.2  | 192112.2  | 0.0    | 0.0      | 1320.5 | 216629.9 |        |          | 201.2  | 33726.4  | 1521.7 | 250356.4 | 442468.5  |
| MA0855000 | PA CRISTINA ALVES<br>PA SÃO JOÃO DO<br>ROSÁRIO                        | 848.2   | 124513.3  | 278.1  | 40833.7  | 873.1  | 128178.5 | 2682.4 | 393803.2 | 130.8  | 19129.3  | 3686.3 | 541110.9 | 706457.9  |
| MA0859000 | PA PRESIDENTE<br>LULA                                                 | 672.9   | 112193.5  | 0.0    | 0.0      | 1973.1 | 312327.7 |        |          | 1031.4 | 165097.1 | 3004.4 | 477424.8 | 589618.3  |
| MA0860000 | PA CAMPO VERDE /<br>COLONE                                            | 1782.7  | 331012.5  | 0.0    | 0.0      | 789.4  | 146516.1 |        |          |        |          | 789.4  | 146516.1 | 477528.6  |
| MA0864000 | PA NOVA CANAÃ /<br>COLONE                                             | 300.5   | 50451.4   | 0.0    | 0.0      |        |          |        |          |        |          | 0.0    | 0.0      | 50451.4   |
| MA0865000 | PA SANTO ANTONIO<br>III                                               | 218.0   | 36600.8   | 0.0    | 0.0      |        |          |        |          |        |          | 0.0    | 0.0      | 36600.8   |
| MA0866000 |                                                                       | 255.1   | 42832.9   | 0.0    | 0.0      |        |          |        |          |        |          | 0.0    | 0.0      | 42832.9   |
| MA0869000 | PA ALTO TURI III                                                      | 23045.3 | 4265106.1 | 0.0    | 0.0      | 95.0   | 17589.0  |        |          | 35.3   | 6545.7   | 130.4  | 24134.6  | 4289240.8 |
| MA0870000 | PA ALTO TURI II<br>PA CENTRO DO<br>ELIAS / BREJO DO<br>LUCAS / COLONE | 19744.1 | 3653870.5 | 0.0    | 0.0      | 76.2   | 14112.8  |        |          | 12.5   | 2322.9   | 88.8   | 16435.6  | 3670306.1 |
| MA0871000 | PA QUADRA ÁGUA<br>AZUL / COLONE                                       | 9273.4  | 1716143.8 | 0.0    | 0.0      | 87.4   | 16167.1  |        |          | 1.2    | 218.2    | 88.5   | 16385.2  | 1732529.1 |
| MA0872000 | PA QUADRA 21 DE<br>ABRIL / COLONE                                     | 4513.4  | 835255.9  | 0.0    | 0.0      | 257.9  | 47724.2  |        |          | 405.3  | 75005.2  | 663.2  | 122729.4 | 957985.3  |
| MA0873000 | PA UNIÃO/SANTO<br>ANTONIO / COLONE                                    | 5852.8  | 1083121.8 | 0.0    | 0.0      | 55.8   | 10329.6  |        |          | 48.6   | 9002.6   | 104.5  | 19332.2  | 1102454.0 |
| MA0874000 |                                                                       | 6572.3  | 1216266.1 | 0.0    | 0.0      | 73.4   | 13590.8  |        |          | 119.4  | 22097.8  | 192.8  | 35688.6  | 1251954.7 |
| MA0876000 | PA FORTAL/COLONE<br>PA TERRA<br>PROMETIDA /<br>COLONE                 | 270.2   | 50001.7   | 0.0    | 0.0      |        |          |        |          |        |          | 0.0    | 0.0      | 50001.7   |
| MA0877000 |                                                                       | 738.2   | 136323.9  | 0.0    | 0.0      |        |          |        |          |        |          | 0.0    | 0.0      | 136323.9  |
| MA0878000 | PA SÃO LUIS /                                                         | 147.6   | 24784.2   | 0.0    | 0.0      |        |          |        |          |        |          | 0.0    | 0.0      | 24784.2   |

| COLONE    |                                                       |         |           |     |     |       |         |      |        |          |        |          |           |      |
|-----------|-------------------------------------------------------|---------|-----------|-----|-----|-------|---------|------|--------|----------|--------|----------|-----------|------|
| MA0879000 | PA CENTRO DO PEDRO / BOM JESUS DA MATA/COLONE PA VILA | 4139.6  | 766074.1  | 0.0 | 0.0 |       |         |      |        | 0.0      | 0.0    | 766074.1 |           |      |
| MA0880000 | ESPERANÇA/COLONE                                      | 95.5    | 16026.0   | 0.0 | 0.0 |       |         |      |        | 0.0      | 0.0    | 16026.0  |           |      |
| MA0881000 | PA QUADRA BETEL / COLONE                              | 3613.9  | 668792.9  | 0.0 | 0.0 | 17.5  | 3247.2  |      |        | 17.5     | 3247.2 | 672040.1 |           |      |
| MA0882000 | PA QUADRA CANAÃ/COLONE                                | 2703.9  | 469788.4  | 0.0 | 0.0 |       |         |      |        | 0.0      | 0.0    | 469788.4 |           |      |
| MA0883000 | PA QUADRA JERICÓ/COLONE                               | 3068.4  | 530690.1  | 0.0 | 0.0 |       |         |      |        | 0.0      | 0.0    | 530690.1 |           |      |
| MA0884000 | PA QUADRA BELÉM / COLONE                              | 2666.6  | 486522.0  | 0.0 | 0.0 |       |         |      |        | 0.0      | 0.0    | 486522.0 |           |      |
| MA0885000 | PA SANTA CLARA / COLONE                               | 209.5   | 35173.3   | 0.0 | 0.0 |       |         |      |        | 0.0      | 0.0    | 35173.3  |           |      |
| MA0886000 | PA ALTO ALEGRE / COLONE                               | 576.0   | 94406.6   | 0.0 | 0.0 |       |         |      |        | 0.0      | 0.0    | 94406.6  |           |      |
| MA0887000 | PA QUADRA BOA ESPERANÇA / COLONE                      | 3627.8  | 671352.2  | 0.0 | 0.0 |       |         |      |        | 0.0      | 0.0    | 671352.2 |           |      |
| MA0888000 | PA QUADRA SÃO FRANCISCO / COLONE                      | 2844.9  | 526485.9  | 0.0 | 0.0 | 213.4 | 39484.2 |      | 357.9  | 66230.0  | 571.2  | 105714.2 | 632200.1  |      |
| MA0889000 | PA QUADRA BRASIL / COLONE                             | 4073.5  | 753850.9  | 0.0 | 0.0 |       |         |      | 0.9    | 170.7    | 0.9    | 170.7    | 754021.7  |      |
| MA0890000 | PA QUADRA PEDRO ALVARES CABRAL / COLONE               | 2971.1  | 549825.4  | 0.0 | 0.0 | 74.3  | 13749.8 |      | 167.9  | 31052.0  | 242.2  | 44801.8  | 594627.2  | 60.2 |
| MA0891000 | PA QUADRA DUQUE DE CAXIAS / COLONE                    | 4963.2  | 918490.8  | 0.0 | 0.0 |       |         |      |        | 0.0      | 0.0    | 918490.8 |           |      |
| MA0892000 | PA REDENÇÃO / BELÉM / COLONE                          | 7557.0  | 1399046.4 | 0.0 | 0.0 | 195.2 | 36136.1 |      | 875.5  | 162211.5 | 1070.7 | 198347.7 | 1597394.1 |      |
| MA0893000 | PA QUADRA JERUSALÉM / COLONE                          | 3278.5  | 606718.6  | 0.0 | 0.0 |       |         |      |        | 0.0      | 0.0    | 606718.6 |           |      |
| MA0894000 | PA SÃO FRANCISCO / COLONE                             | 177.9   | 29862.7   | 0.0 | 0.0 | 1.0   | 125.0   | 58.3 | 9789.0 | 59.3     | 9914.0 | 39776.7  |           |      |
| MA0896000 | PA MORADA NOVA/CENTRO DOS PINHEIROS / COLONE          | 4632.3  | 788902.6  | 0.0 | 0.0 |       |         |      |        | 0.0      | 0.0    | 788902.6 |           |      |
| MA0897000 | PA PEDREIRA II / INGAZAL / COLONE                     | 1272.2  | 197612.6  | 0.0 | 0.0 |       |         |      |        | 0.0      | 0.0    | 197612.6 |           |      |
| MA0898000 | PA CENTRO DOS MARTINS / AGRICOLÂNDIA / COLONE         | 12309.4 | 2277975.9 | 0.0 | 0.0 | 95.1  | 17602.2 |      | 34.4   | 6364.4   | 129.5  | 23966.6  | 2301942.5 |      |
| MA0901000 | PA QUADRA NOVA / 13 DE JUNHO /                        | 3132.7  | 560996.7  | 0.0 | 0.0 |       |         |      |        | 0.0      | 0.0    | 560996.7 |           |      |

| COLONE    |                                                                   |         |           |     |     |        |          |        |           |        |           |           |       |
|-----------|-------------------------------------------------------------------|---------|-----------|-----|-----|--------|----------|--------|-----------|--------|-----------|-----------|-------|
| MA0902000 | PA QUADRA<br>BENEDITO MENDES /<br>QUADRA<br>FORTALEZA /<br>COLONE | 6261.8  | 1158807.3 | 0.0 | 0.0 |        |          |        | 0.0       | 0.0    |           | 1158807.3 |       |
| MA0906000 | PA QUADRA SÃO<br>RAIMUNDO III /<br>COLONE                         | 13969.6 | 2592686.8 | 0.0 | 0.0 | 1343.3 | 250228.2 | 2843.6 | 530174.8  | 4186.9 | 780402.9  | 3373089.8 | 60.7  |
| MA0909000 | PA QUADRA SABIÁ /<br>COLONE                                       | 4965.6  | 918935.2  | 0.0 | 0.0 | 122.1  | 22599.2  | 248.6  | 46011.8   | 370.8  | 68611.0   | 987546.2  |       |
| MA0911000 | PA ITAMATARÉ /<br>COLONE                                          | 18544.7 | 3435857.1 | 0.0 | 0.0 | 1179.1 | 219036.8 | 3467.8 | 645245.8  | 4647.0 | 864282.6  | 4300139.6 | 224.1 |
| MA0912000 | PA PINDORAMA /<br>ARARIBÓIA /<br>COLONE                           | 28953.7 | 5356124.2 | 0.0 | 0.0 | 437.0  | 80314.1  | 1174.8 | 215739.8  | 1611.8 | 296054.0  | 5652178.2 |       |
| MA0913000 | PA 15 DE JUNHO /<br>IGARAPÉ AREIA /<br>SÃO JOSE II /<br>COLONE    | 7578.0  | 1402388.3 | 0.0 | 0.0 | 60.0   | 11108.5  | 2.2    | 403.5     | 62.2   | 11512.0   | 1413900.3 |       |
| MA0914000 | PA FÉ EM DEUS /<br>COLONIAL / COLONE                              | 15030.5 | 2781467.9 | 0.0 | 0.0 |        |          |        |           | 0.0    | 0.0       | 2781467.9 |       |
| MA0915000 | PA JACI / COLONE                                                  | 6588.9  | 1219344.2 | 0.0 | 0.0 | 32.7   | 6055.4   | 86.7   | 16045.6   | 119.4  | 22101.0   | 1241445.2 |       |
| MA0916000 | PA SÃO JOÃO / 16 DE<br>OUTUBRO / COLONE                           | 4147.3  | 767508.4  | 0.0 | 0.0 |        |          |        |           | 0.0    | 0.0       | 767508.4  |       |
| MA0917000 | PA NOVA VIDA /<br>SERPETIARA /<br>COLONE                          | 4573.3  | 846326.5  | 0.0 | 0.0 | 262.2  | 48523.8  | 126.3  | 23375.9   | 388.5  | 71899.7   | 918226.2  | 3.6   |
| MA0918000 | PA QUADRA<br>CASTELO BRANCO /<br>COLONE                           | 4731.5  | 875607.4  | 0.0 | 0.0 | 41.4   | 7651.7   | 238.1  | 44063.3   | 279.5  | 51715.0   | 927322.4  | 9.8   |
| MA0921000 | PA SANTA TEREZA /<br>COLONE                                       | 138.8   | 20320.7   | 0.0 | 0.0 | 14.6   | 1780.4   |        |           | 14.6   | 1780.4    | 22101.1   | 10.2  |
| MA0924000 | PA SÃO JUDAS<br>TADEU                                             | 726.6   | 121985.7  | 0.0 | 0.0 | 0.6    | 100.1    |        |           | 0.6    | 100.1     | 122085.8  | 47.3  |
| MA0925000 | PA CONCEIÇÃO I<br>PA SÃO PEDRO /<br>COLONE                        | 847.8   | 142331.1  | 0.0 | 0.0 |        |          |        |           | 0.0    | 0.0       | 142331.1  |       |
| MA0926000 | PA 22 DE SETEMBRO<br>/ SANTA TEREZA /<br>COLONE                   | 381.3   | 64015.0   | 0.0 | 0.0 |        |          |        |           | 0.0    | 0.0       | 64015.0   |       |
| MA0927000 | PA CAFÉ DA MATA /<br>COLONE                                       | 26534.5 | 4828204.8 | 0.0 | 0.0 | 10.7   | 1977.3   | 5.7    | 1052.6    | 16.4   | 3029.9    | 4831234.6 |       |
| MA0928000 | PA MATA AZUL /<br>COLONE                                          | 2955.3  | 456928.6  | 0.0 | 0.0 |        |          |        |           | 0.0    | 0.0       | 456928.6  |       |
| MA0929000 | PA GRACILÂNDIA /<br>CIDELÂNDIA /<br>COLONE                        | 1793.4  | 329928.0  | 0.0 | 0.0 | 322.8  | 57354.3  | 308.2  | 55790.6   | 630.9  | 113144.9  | 443072.9  |       |
| MA0931000 | PA NADIR / SÃO<br>VICENTE / COLONE                                | 15192.5 | 2806920.2 | 0.0 | 0.0 | 22.5   | 4067.6   | 168.7  | 29579.7   | 191.2  | 33647.2   | 2840567.5 |       |
| MA0932000 |                                                                   | 23197.7 | 4293618.7 | 0.0 | 0.0 | 808.6  | 149745.1 | 5540.5 | 1026901.9 | 6349.2 | 1176647.0 | 5470265.8 |       |

|           |                                     |         |           |       |         |        |          |            |          |        |          |        |          |           |
|-----------|-------------------------------------|---------|-----------|-------|---------|--------|----------|------------|----------|--------|----------|--------|----------|-----------|
| MA0933000 | PA SÃO FRANCISCO<br>II / COLONE     | 148.3   | 26136.2   | 0.0   | 0.0     |        |          |            |          |        | 0.0      | 0.0    | 26136.2  |           |
| MA0934000 | PA FELIZ UNIÃO /<br>COLONE          | 324.3   | 60011.1   | 0.0   | 0.0     |        |          |            |          |        | 0.0      | 0.0    | 60011.1  |           |
| MA0935000 | PA NOSSA VITÓRIA /<br>COLONE        | 241.2   | 40874.9   | 0.0   | 0.0     |        |          |            |          |        | 0.0      | 0.0    | 40874.9  |           |
| MA0939000 | PA LEELAU<br>/CAJUEIRO/COLONE       | 1087.2  | 201201.0  | 0.0   | 0.0     | 0.0    | 0.9      |            |          |        | 0.0      | 0.9    | 201201.9 |           |
| MA0940000 | PA ABAIXADINHO /<br>COLONE          | 1245.4  | 200493.7  | 0.0   | 0.0     | 285.1  | 48353.4  | 1760.<br>4 | 57308.1  | 162.4  | 28229.8  | 2207.9 | 133891.2 | 334384.9  |
| MA0941000 | PA UBINZAL /<br>COLONE              | 15333.3 | 2528622.0 | 0.0   | 0.0     | 106.1  | 17956.9  | 1082.<br>8 | 19521.7  | 63.6   | 10177.7  | 1252.6 | 47656.3  | 2576278.2 |
| MA0943000 | PA SÃO JOSÉ<br>PA TATAJUBA / 10     | 0.0     | 0.0       | 133.0 | 2935.4  |        |          | 1296.<br>5 | 27008.0  |        |          | 1296.5 | 27008.0  | 29943.3   |
| MA0944000 | DE ABRIL / COLONE<br>PA VILA NOVA / | 4127.6  | 710315.8  | 0.0   | 0.0     | 1.2    | 197.0    |            |          | 1.1    | 188.2    | 2.3    | 385.2    | 710701.0  |
| MA0945000 | ÁGUA BRANCA<br>PA MARACAÇUMÉ /      | 15.4    | 2579.6    | 0.0   | 0.0     | 132.0  | 20436.2  | 531.3      | 77678.6  |        |          | 663.3  | 98114.8  | 100694.4  |
| MA0946000 | PA MARACAÇUMÉ /<br>RICOA            | 1590.4  | 267013.9  | 0.0   | 0.0     |        |          | 9.5        | 1593.8   |        |          | 9.5    | 1593.8   | 268607.7  |
| MA0947000 | PA JUSSARAL DO<br>ANTONIO ROXO      | 808.9   | 95530.0   | 0.0   | 0.0     |        |          | 845.0      | 13537.1  |        |          | 845.0  | 13537.1  | 109067.1  |
| MA0948000 | PA CUBA                             | 365.5   | 61366.9   | 0.0   | 0.0     | 375.4  | 63024.3  | 3.6        | 604.3    |        |          | 379.0  | 63628.6  | 124995.5  |
| MA0954000 | PA MAPISA                           | 7013.1  | 1297838.0 | 0.0   | 0.0     | 2139.4 | 395924.3 |            |          | 32.9   | 6090.6   | 2172.3 | 402014.9 | 1699852.9 |
| MA0956000 | PA ALEGRE<br>PA BOCA DA MATA        | 0.0     | 0.0       | 114.8 | 8866.4  |        |          | 1880.<br>7 | 139576.3 |        |          | 1880.7 | 139576.3 | 148442.7  |
| MA0959000 | PA BOCA DA MATA<br>II               | 478.4   | 70880.1   | 34.9  | 5128.4  | 23.8   | 3490.5   |            |          | 98.0   | 14385.0  | 121.8  | 17875.4  | 93883.9   |
| MA0961000 | PA MONTE ALEGRE /<br>DENDÊ          | 324.7   | 22563.2   | 283.2 | 35220.3 |        |          |            |          | 572.8  | 67940.4  | 572.8  | 67940.4  | 125723.9  |
| MA0962000 | PE TATAJUBA<br>PA APARECIDA DO      | 3157.9  | 580934.0  | 0.0   | 0.0     | 865.7  | 159187.5 |            |          | 1453.2 | 267271.3 | 2318.9 | 426458.8 | 1007392.8 |
| MA0963000 | MEARIM<br>PA JIQUIRI / SANTO        | 123.2   | 18858.8   | 578.8 | 88112.6 | 1946.6 | 297933.7 | 1693.<br>8 | 259016.7 |        |          | 3640.4 | 556950.4 | 663921.8  |
| MA0965000 | AGOSTINHO<br>PA AGAYNARA /          | 1109.3  | 123821.8  | 0.0   | 0.0     | 35.0   | 4807.8   |            |          | 7.6    | 1274.7   | 42.6   | 6082.5   | 129904.4  |
| MA0968000 | PA AGAYNARA /<br>SEMBAL             | 1111.6  | 43409.1   | 76.9  | 3349.4  |        |          |            |          | 388.2  | 34286.2  | 388.2  | 34286.2  | 81044.7   |
| MA0969000 | PA FLECHAL                          | 14612.1 | 2701023.4 | 0.0   | 0.0     | 1384.2 | 256615.1 |            |          | 1188.0 | 220120.8 | 2572.2 | 476735.9 | 3177759.3 |
| MA0973000 | PA VILA NOVA<br>PA NÚCLEO A - I /   | 496.9   | 92863.5   | 0.0   | 0.0     | 1502.4 | 280774.4 |            |          |        |          | 1502.4 | 280774.4 | 373637.9  |
| MA0974000 | COLONE<br>PA BOQUEIRÃO I /          | 9644.7  | 1766294.2 | 0.0   | 0.0     |        |          |            |          |        |          | 0.0    | 0.0      | 1766294.2 |
| MA0975000 | COLONE<br>PA QUADRA                 | 370.7   | 62232.9   | 0.0   | 0.0     | 6.0    | 1003.8   |            |          |        |          | 6.0    | 1003.8   | 63236.6   |
| MA0976000 | PIMENTEIRA /<br>COLONE              | 1547.8  | 276039.5  | 0.0   | 0.0     |        |          |            |          |        |          | 0.0    | 0.0      | 276039.5  |
| MA0977000 | PA QUADRA 10 DE<br>JANEIRO / COLONE | 1261.4  | 233442.7  | 0.0   | 0.0     |        |          |            |          |        |          | 0.0    | 0.0      | 233442.7  |

|           |                                                     |        |           |        |         |         |           |            |          |       |         |           |           |           |      |
|-----------|-----------------------------------------------------|--------|-----------|--------|---------|---------|-----------|------------|----------|-------|---------|-----------|-----------|-----------|------|
| MA0978000 | PA QUADRA NOVA<br>PIMENTEIRA /<br>COLONE            | 1249.6 | 229568.1  | 0.0    | 0.0     |         |           |            |          | 0.0   | 0.0     | 229568.1  |           |           |      |
| MA0979000 | PA DIBOM I                                          | 3095.2 | 519655.7  | 0.0    | 0.0     | 11.5    | 1927.9    | 56.5       | 9484.1   |       | 68.0    | 11412.0   | 531067.7  | 287.5     |      |
| MA0980000 | PA DIBOM II                                         | 1562.2 | 262282.3  | 0.0    | 0.0     | 39.6    | 6649.0    |            |          |       | 39.6    | 6649.0    | 268931.3  |           |      |
| MA0981000 | PA BOM JESUS III                                    | 359.4  | 54757.9   | 0.0    | 0.0     | 1564.5  | 191719.5  |            |          | 141.8 | 17567.2 | 1706.3    | 209286.7  | 264044.6  | 12.8 |
| MA0982000 | PA BOCA DA MATA I                                   | 2065.0 | 306197.2  | 0.0    | 0.0     | 336.5   | 56498.4   | 450.5      | 6962.7   |       | 787.0   | 63461.1   | 369658.3  | 306.2     |      |
| MA0994000 | PE TATAJUBAL                                        | 373.8  | 63381.8   | 0.0    | 0.0     | 9.8     | 1692.1    |            |          |       | 9.8     | 1692.1    | 65073.9   |           |      |
| MA0997000 | PA SOBRADINHO<br>PA SÃO<br>BARTOLOMEU /<br>CIAMA    | 2249.1 | 342901.8  | 736.4  | 88076.2 | 10734.0 | 1642379.7 | 2023.<br>8 | 270379.6 |       | 12757.7 | 1912759.3 | 2343737.3 |           |      |
| MA0998000 | PA TORRÃO<br>MUQUEM                                 | 2752.8 | 509430.9  | 0.0    | 0.0     | 482.4   | 89277.3   |            |          |       | 482.4   | 89277.3   | 598708.1  |           |      |
| MA0999000 | PA TORRÃO<br>MUQUEM                                 | 489.3  | 82144.1   | 0.0    | 0.0     |         |           |            |          |       | 0.0     | 0.0       | 82144.1   |           |      |
| MA1002000 | PA FÊNIX                                            | 7129.9 | 1318724.4 | 0.0    | 0.0     | 2153.4  | 400858.2  |            |          | 65.0  | 11993.2 | 2218.5    | 412851.4  | 1731575.9 |      |
| MA1003000 | PA TERRA LIVRE<br>PAE                               | 1244.3 | 232551.7  | 0.0    | 0.0     | 2018.6  | 377260.5  |            |          | 59.8  | 11173.3 | 2078.4    | 388433.7  | 620985.4  |      |
| MA1005000 | AGROEXTRATIVIST<br>A BACURI                         | 0.0    | 0.0       | 127.8  | 4217.5  |         |           | 5682.<br>0 | 187449.3 |       | 5682.0  | 187449.3  | 191666.8  |           |      |
| MA1017000 | PA MUTUM                                            | 0.0    | 0.0       | 0.0    | 0.0     |         |           | 67.3       | 10345.4  |       | 67.3    | 10345.4   | 10345.4   |           |      |
| MA1025000 | PA CATINGUEIRO<br>PA SÃO<br>FRANCISCO/BOA<br>VIAGEM | 669.6  | 112416.6  | 0.0    | 0.0     |         |           |            |          |       | 0.0     | 0.0       | 112416.6  |           |      |
| MA1030000 | PA CATINGUEIRO<br>PA SÃO<br>FRANCISCO/BOA<br>VIAGEM | 935.8  | 173187.2  | 0.0    | 0.0     | 286.5   | 53025.5   |            |          |       | 286.5   | 53025.5   | 226212.8  |           |      |
| MA1031000 | PA RENASCER<br>PA HORIZONTE                         | 146.4  | 24598.5   | 0.0    | 0.0     | 429.1   | 72043.4   |            |          | 37.7  | 6338.3  | 466.8     | 78381.7   | 102980.3  | 0.2  |
| MA1032000 | AZUL                                                | 357.6  | 66832.4   | 0.0    | 0.0     | 1566.1  | 292684.9  |            |          | 16.8  | 3142.1  | 1582.9    | 295827.0  | 362659.3  |      |
| MA1033000 | PA SÃO RAIMUNDO<br>PA<br>CRISTALINA/COLON<br>E      | 1135.8 | 170161.6  | 163.3  | 24464.2 | 282.5   | 42327.5   | 977.2      | 146401.3 |       | 1259.8  | 188728.8  | 383354.6  |           |      |
| MA1042000 | PA VILA SANTA<br>MARIA/PIRATINING<br>A              | 229.5  | 42467.7   | 0.0    | 0.0     |         |           |            |          |       | 0.0     | 0.0       | 42467.7   |           |      |
| MA1043000 | PA LAGOA DA<br>FLORESTA                             | 312.0  | 52375.5   | 0.0    | 0.0     |         |           |            |          |       | 0.0     | 0.0       | 52375.5   |           |      |
| MA1045000 | PA OZIEL ALVES<br>PEREIRA I                         | 1144.1 | 171399.3  | 191.7  | 28712.2 | 926.0   | 138725.1  | 38.5       | 5762.4   |       | 964.5   | 144487.5  | 344599.0  |           |      |
| MA1051000 | PA VILA SANTA<br>MARIA/PIRATINING<br>A              | 889.0  | 133181.5  | 0.0    | 3.6     |         |           | 0.5        | 77.0     |       | 0.5     | 77.0      | 133262.1  |           |      |
| MA1055000 | PA VALE DO TAPUIO<br>PAE                            | 0.0    | 0.0       | 1170.8 | 38623.7 |         |           | 8237.<br>7 | 271762.4 |       | 8237.7  | 271762.4  | 310386.1  |           |      |
| MA1056000 | AGROEXTRATIVIST<br>A BACURI I                       | 181.9  | 21810.7   | 0.0    | 0.0     | 367.3   | 54948.2   | 278.6      | 10158.3  |       | 645.9   | 65106.4   | 86917.1   | 440.6     |      |

|           |                                                   |           |             |              |            |              |            |                     |                |              |            |              |            |             |             |
|-----------|---------------------------------------------------|-----------|-------------|--------------|------------|--------------|------------|---------------------|----------------|--------------|------------|--------------|------------|-------------|-------------|
| MA1057000 | PAE<br>AGROEXTRATIVIST<br>A SANTANA RAPOSO<br>III | 398.4     | 66888.6     | 0.0          | 0.0        | 133.7        | 22454.6    | 211.8               | 9684.5         | 9.6          | 1606.5     | 355.1        | 33745.6    | 100634.2    | 93.0        |
| MA1058000 | PA NUCLEO BB                                      | 3306.3    | 611865.1    | 0.0          | 0.0        |              |            |                     |                |              |            | 0.0          | 0.0        | 611865.1    |             |
| MA1060000 | PA BREJO DO JOÃO                                  | 315.3     | 46626.1     | 42.6         | 4995.0     | 365.1        | 50224.9    | 2188.<br>8          | 254282.7       |              |            | 2554.0       | 304507.6   | 356128.8    |             |
| MA1061000 | PDS PETROLINA                                     | 605.9     | 101725.2    | 0.0          | 0.0        |              |            |                     |                |              |            | 0.0          | 0.0        | 101725.2    |             |
| MA1062000 | PDS CITEMA                                        | 9353.7    | 1745061.3   | 0.0          | 0.0        | 9088.7       | 1698265.0  |                     |                | 4626.8       | 864480.9   | 13715.5      | 2562746.0  | 4307807.3   | 4.8         |
| MA1063000 | PAE VILA ADRIANA                                  | 504.1     | 92280.0     | 0.0          | 0.0        |              |            |                     |                |              |            | 0.0          | 0.0        | 92280.0     |             |
| MA1064000 | PDS TEMASA                                        | 1006.7    | 188146.2    | 0.0          | 0.0        | 3482.3       | 650811.6   | 1950.<br>4          | 364437.2       | 1185.7       | 221589.6   | 6618.4       | 1236838.4  | 1424984.6   | 19.9        |
| MA1065000 | PA BACURIZINHO                                    | 400.3     | 67200.2     | 0.0          | 0.0        |              |            |                     |                |              |            | 0.0          | 0.0        | 67200.2     |             |
| MA1066000 | PDS SANTA<br>BÁRBARA                              | 5574.1    | 935829.8    | 0.0          | 0.0        | 0.0          | 4.3        |                     |                |              |            | 0.0          | 4.3        | 935834.1    |             |
| MA1067000 | PA SAO FELIX I                                    | 0.0       | 0.0         | 0.0          | 0.0        |              |            | 739.1<br>1456.<br>7 | 108514.0       |              |            | 739.1        | 108514.0   | 108514.0    |             |
| MA1068000 | PA NOVA CANAA<br>PA FRANCISCO<br>ROMAO            | 0.0       | 0.0         | 123.5        | 18132.9    |              |            |                     | 213860.8       |              |            | 1456.7       | 213860.8   | 231993.7    |             |
| MA1069000 |                                                   | 3193.4    | 590977.4    | 0.0          | 0.0        | 961.9        | 178001.5   |                     |                |              |            | 961.9        | 178001.5   | 768978.9    |             |
| MA1070000 | PDS JOAO DO VALE I                                | 1210.7    | 222370.0    | 0.0          | 0.0        | 7.5          | 1384.7     |                     |                |              |            | 7.5          | 1384.7     | 223754.7    |             |
| MA1071000 | PAE SANTA MARIA                                   | 544.9     | 91476.8     | 0.0          | 0.0        |              |            |                     |                |              |            | 0.0          | 0.0        | 91476.8     |             |
|           | Total in Maranhão                                 | 2065499.8 | 348825941.4 | 106208.<br>1 | 12258927.3 | 248529.<br>0 | 41586824.6 | 2486<br>94.3        | 17984500.<br>8 | 179692.<br>0 | 28376775.0 | 676915.<br>2 | 87948100.4 | 449032969.1 | 17890.<br>1 |
|           | <b>MATO<br/>GROSSO</b>                            |           | 0.0         | 0.0          | 0.0        |              |            |                     |                |              |            | 0.0          | 0.0        | 0.0         |             |
| MT0011000 | PAC PEIXOTO DE<br>AZEVEDO                         | 50198.0   | 8621720.1   | 0.0          | 0.0        | 8535.1       | 1462843.1  |                     |                |              |            | 8535.1       | 1462843.1  | 10084563.2  |             |
| MT0012000 | PAC CARLINDA                                      | 32411.2   | 5447537.4   | 0.0          | 0.0        | 1972.1       | 335496.4   |                     |                |              |            | 1972.1       | 335496.4   | 5783033.8   | 8.0         |
| MT0013000 | PA BRAÇO SUL                                      | 125632.9  | 20694051.8  | 0.0          | 0.0        | 29673.6      | 4701459.3  | 329.4<br>2495.<br>9 | 51327.5        | 112.9        | 17679.8    | 30115.8      | 4770466.6  | 25464518.4  | 33.9        |
| MT0014000 | PA CAPÃO VERDE                                    | 3167.8    | 464715.6    | 0.0          | 0.0        | 122.3        | 17022.9    |                     | 181288.9       |              |            | 2618.3       | 198311.7   | 663027.3    |             |
| MT0015000 | PA TUPÃ                                           | 2638.4    | 346990.4    | 0.0          | 0.0        | 180.5        | 26492.9    | 35.0                | 4924.3         |              |            | 215.5        | 31417.2    | 378407.6    |             |
| MT0016000 | PA MORRINHO                                       | 0.0       | 0.0         | 2023.5       | 66754.7    |              |            | 110.7<br>3597.<br>4 | 3653.0         |              |            | 110.7        | 3653.0     | 70407.7     | 0.1         |
| MT0017000 | PA SARARÉ                                         | 13611.6   | 2030387.4   | 0.0          | 0.0        | 901.6        | 132639.8   |                     | 186523.7       |              |            | 4498.9       | 319163.5   | 2349550.9   |             |
| MT0018000 | PA 1.500 ALQUEIRES<br>PA NOVA                     | 3259.9    | 486020.9    | 0.0          | 0.0        | 117.9        | 16287.6    |                     |                |              |            | 117.9        | 16287.6    | 502308.5    |             |
| MT0019000 | ALVORADA                                          | 3726.3    | 545848.3    | 0.0          | 0.0        | 458.5        | 66846.3    |                     |                |              |            | 458.5        | 66846.3    | 612694.6    |             |
| MT0020000 | PA PAPIRO                                         | 160.4     | 5291.9      | 0.0          | 0.0        | 0.7          | 23.8       | 1089.<br>2          | 35932.3        |              |            | 1089.9       | 35956.1    | 41248.0     |             |

|           |                       |         |           |         |          |        |          |        |          |         |           |           |       |
|-----------|-----------------------|---------|-----------|---------|----------|--------|----------|--------|----------|---------|-----------|-----------|-------|
| MT0021000 | PA NOVO MÉXICO        | 8600.5  | 1444518.3 | 0.0     | 0.0      | 1329.0 | 226622.2 |        |          | 1329.0  | 226622.2  | 1671140.5 |       |
| MT0022000 | PA CORONEL ARI        | 7291.8  | 993476.1  | 0.0     | 0.0      | 259.5  | 35577.2  | 764.2  | 29398.5  | 1023.7  | 64975.6   | 1058451.7 |       |
| MT0023000 | PA CANA BRAVA         | 20555.0 | 2706278.0 | 4924.2  | 240924.5 | 427.3  | 19934.3  | 9333.0 | 502488.2 | 9760.2  | 522422.4  | 3469624.9 | 25.1  |
| MT0025000 | PA HIJ                | 26080.4 | 4181102.2 | 0.0     | 0.0      | 3351.6 | 516727.1 |        |          | 3351.6  | 516727.1  | 4697829.3 |       |
| MT0026000 | PA ETA                | 21895.9 | 3667229.2 | 0.0     | 0.0      | 1391.6 | 230250.7 |        |          | 1391.6  | 230250.7  | 3897479.8 | 57.6  |
| MT0027000 | PA TIRA SENTIDO       | 4768.2  | 547397.1  | 0.0     | 0.0      | 31.7   | 4482.5   | 1516.9 | 50041.9  | 1548.6  | 54524.4   | 601921.5  |       |
| MT0028000 | PA JATOBAZINHO        | 0.0     | 0.0       | 13389.8 | 232601.1 |        |          | 1746.9 | 33229.4  | 1746.9  | 33229.4   | 265830.4  |       |
| MT0029000 | PA FORMOSA            | 6608.3  | 928226.9  | 0.0     | 0.0      | 1358.4 | 185564.1 | 6649.2 | 253531.1 | 8007.6  | 439095.2  | 1367322.1 |       |
| MT0030000 | PA GATO PRETO         | 0.0     | 0.0       | 4319.7  | 316611.0 |        |          | 3189.8 | 174735.6 | 3189.8  | 174735.6  | 491346.6  |       |
| MT0031000 | PA SAFRA              | 0.0     | 0.0       | 20113.9 | 663140.7 |        |          | 9275.3 | 394350.9 | 9275.3  | 394350.9  | 1057491.6 |       |
| MT0033000 | PA RIO DOS COCOS      | 3499.8  | 468576.2  | 0.0     | 0.0      | 1469.7 | 187766.8 | 1.4    | 211.5    | 1471.2  | 187978.3  | 656554.5  |       |
| MT0035000 | PA CRUZEIRO DO NORTE  | 1676.9  | 235899.0  | 440.2   | 34571.6  | 122.3  | 18313.4  | 246.6  | 22170.4  | 368.9   | 40483.8   | 310954.4  |       |
| MT0037000 | PA MARAGATOS          | 0.0     | 0.0       | 1695.0  | 49424.4  |        |          | 1032.9 | 34814.8  | 1032.9  | 34814.8   | 84239.2   | 2.8   |
| MT0039000 | PA ILHA DO COCO       | 0.0     | 0.0       | 898.8   | 28473.1  |        |          | 627.7  | 20707.5  | 627.7   | 20707.5   | 49180.6   |       |
| MT0040000 | PA RIBERÃO DOS COCAIS | 2062.9  | 76101.4   | 142.6   | 4743.6   | 38.8   | 3540.6   | 105.3  | 3474.6   | 144.1   | 7015.2    | 87860.2   |       |
| MT0041000 | PA MELLO              | 3147.3  | 272678.6  | 0.0     | 0.0      |        |          |        |          | 0.0     | 0.0       | 272678.6  |       |
| MT0042000 | PA MONTECHI           | 56.4    | 1860.6    | 568.8   | 18764.3  |        |          | 288.6  | 9521.6   | 288.6   | 9521.6    | 30146.5   |       |
| MT0043000 | PA VINAGRE LOTE 31    | 2042.8  | 342966.1  | 0.0     | 0.0      |        |          |        |          | 0.0     | 0.0       | 342966.1  |       |
| MT0044000 | PA CRUZEIRO DO SUL    | 14172.6 | 1990885.9 | 0.0     | 0.0      | 9198.1 | 723100.5 | 7605.8 | 706424.7 | 16803.9 | 1429525.3 | 3420411.1 | 23.5  |
| MT0045000 | PA LIBERDADE          | 2622.8  | 377291.2  | 0.0     | 0.0      |        |          |        |          | 0.0     | 0.0       | 377291.2  |       |
| MT0046000 | PA SERRA NOVA I       | 17804.4 | 2649223.5 | 0.0     | 0.0      | 27.4   | 4078.8   | 2596.7 | 381638.1 | 2624.1  | 385716.9  | 3034940.5 |       |
| MT0047000 | PA MIRASSOLZINHO      | 10978.7 | 1592784.5 | 141.7   | 18353.4  | 4669.3 | 656687.1 | 2337.4 | 758348.0 | 28043.8 | 1415035.1 | 3026173.1 | 285.6 |
| MT0048000 | PA PRESIDENTE         | 4071.3  | 283226.1  | 3375.0  | 111348.0 |        |          | 212.7  | 7107.6   | 212.7   | 7107.6    | 401681.7  | 46.6  |
| MT0049000 | PA RIO VERMELHO       | 0.0     | 0.0       | 1007.1  | 88479.1  |        |          | 1057.7 | 73388.7  | 1057.7  | 73388.7   | 161867.8  |       |
| MT0050000 | PA SERRAGEM           | 20520.5 | 2569952.4 | 0.0     | 0.0      | 4673.0 | 419182.9 |        |          | 4673.0  | 419182.9  | 2989135.3 | 1.7   |
| MT0051000 | PA JACARÉ             | 23769.3 | 3078711.7 | 0.0     | 0.0      | 2475.6 | 264863.2 | 5332.4 | 515531.2 | 7808.0  | 780394.5  | 3859106.1 |       |
| MT0052000 | PA CANTA GALO         | 15640.0 | 663058.6  | 11585.3 | 455420.1 | 376.8  | 12431.0  | 2147.4 | 727988.5 | 21851.4 | 740419.5  | 1858898.3 |       |



|           |                               |         |            |         |           |         |           |                     |           |         |           |            |       |
|-----------|-------------------------------|---------|------------|---------|-----------|---------|-----------|---------------------|-----------|---------|-----------|------------|-------|
| MT0053000 | PA<br>COQUEIRAL/QUEBÓ         | 6320.6  | 853416.5   | 0.0     | 0.0       | 531.6   | 60283.3   | 4809.<br>3          | 204346.3  | 5340.9  | 264629.7  | 1118046.1  |       |
| MT0054000 | PA NOROAGRO                   | 0.0     | 0.0        | 1120.5  | 45993.2   |         |           | 416.7<br>1673.      | 22345.4   | 416.7   | 22345.4   | 68338.7    | 80.4  |
| MT0055000 | PA VOLTA GRANDE               | 11132.8 | 1035437.9  | 0.0     | 0.0       | 6740.6  | 568957.2  | 0                   | 127094.4  | 8413.6  | 696051.7  | 1731489.5  |       |
| MT0056000 | PA MIRANDA<br>ESTÂNCIA        | 15084.6 | 2675853.1  | 0.0     | 0.0       | 2669.8  | 487186.6  |                     |           | 2669.8  | 487186.6  | 3163039.7  |       |
| MT0057000 | PA PERSEVERANÇA<br>PACUTINGA  | 71487.4 | 10951784.6 | 88.2    | 4208.8    | 33716.8 | 5191756.2 | 9219.<br>2          | 215792.7  | 42936.0 | 5407548.8 | 16363542.2 | 18.9  |
| MT0058000 | PA TIBAGI                     | 8412.6  | 1254310.9  | 24049.5 | 3544320.6 | 1165.8  | 176875.4  | 576.4<br>4126.<br>7 | 86891.8   | 1742.2  | 263767.2  | 5062398.7  |       |
| MT0060000 | PA ELDORADO I                 | 0.0     | 0.0        | 3319.4  | 86241.0   |         |           |                     |           | 4126.7  | 106178.6  | 192419.6   | 66.1  |
| MT0061000 | PA PIAU                       | 2813.0  | 421218.6   | 0.0     | 0.0       |         |           |                     |           | 0.0     | 0.0       | 421218.6   |       |
| MT0062000 | PA TRIANGULO                  | 0.0     | 0.0        | 5296.0  | 143287.4  |         |           | 4119.<br>2          | 122706.7  | 4119.2  | 122706.7  | 265994.0   |       |
| MT0063000 | PA SERRINHA<br>PA COUTINHO    | 11978.4 | 1821297.1  | 0.0     | 0.0       | 3570.5  | 543622.8  | 120.1               | 16425.9   | 3690.6  | 560048.7  | 2381345.8  |       |
| MT0064000 | UNLÃO                         | 7870.2  | 658724.8   | 2.0     | 64.7      | 32.8    | 3596.2    | 16.1                | 1468.2    | 48.9    | 5064.4    | 663853.9   |       |
| MT0065000 | PA FICA FACA                  | 1227.9  | 78970.2    | 7751.9  | 208595.3  | 106.2   | 14517.4   | 452.3<br>1127       | 32010.6   | 558.5   | 46528.0   | 334093.5   | 14.0  |
| MT0066000 | PA PONTAL                     | 9500.6  | 1180611.3  | 4.0     | 243.5     | 1633.3  | 85922.4   | 1.5<br>4380.        | 994341.9  | 12904.8 | 1080264.2 | 2261119.0  |       |
| MT0067000 | PA PIRACICABA<br>PA AZULONA   | 315.5   | 17949.3    | 5721.1  | 194109.3  | 281.0   | 18775.6   | 8                   | 153340.8  | 4661.8  | 172116.4  | 384175.0   |       |
| MT0068000 | GAMELEIRA<br>PA SANTO ANTONIO | 15817.0 | 1588802.0  | 5113.1  | 389168.1  | 16535.4 | 1854766.5 | 6877<br>9.9         | 2340824.5 | 85315.3 | 4195591.1 | 6173561.2  | 761.4 |
| MT0069000 | DA MATA AZUL                  | 0.0     | 0.0        | 2551.7  | 49012.9   | 0.0     | 1.6       | 1271.<br>8          | 71871.2   | 1271.8  | 71872.8   | 120885.7   |       |
| MT0070000 | PA MARTINS I                  | 3468.7  | 354244.1   | 0.0     | 0.0       | 270.2   | 33987.1   | 423.9               | 28610.6   | 694.2   | 62597.8   | 416841.9   |       |
| MT0071000 | PA GRANJA                     | 0.0     | 0.0        | 10221.8 | 337217.9  |         |           | 629.6<br>2172.      | 20768.9   | 629.6   | 20768.9   | 357986.8   | 2.9   |
| MT0072000 | PA BANDEIRANTES<br>PA XAVANTE | 5496.0  | 702574.9   | 0.0     | 0.0       | 914.4   | 77253.8   | 5                   | 320069.9  | 3087.0  | 397323.7  | 1099898.7  |       |
| MT0073000 | FIGURA A                      | 21.2    | 1541.0     | 7919.4  | 158853.9  | 80.9    | 6196.8    | 8.8<br>7011.        | 669628.1  | 25179.7 | 675824.9  | 836219.7   |       |
| MT0074000 | PA CHAPADINHA                 | 21331.6 | 2481148.8  | 2392.4  | 73765.2   | 3089.6  | 271337.8  | 0<br>4582.          | 202763.6  | 10100.6 | 474101.5  | 3029015.4  | 7.4   |
| MT0075000 | PA FARTURA                    | 3628.8  | 119569.3   | 6079.5  | 157066.2  | 1316.4  | 44970.6   | 8                   | 148058.5  | 5899.2  | 193029.0  | 469664.6   |       |
| MT0076000 | PA BOJUI<br>PA NOVA           | 62950.9 | 11247683.0 | 0.0     | 0.0       | 36968.9 | 6659930.8 | 4.3                 | 703.8     | 36973.2 | 6660634.6 | 17908317.7 |       |
| MT0077000 | COTRIGUAÇU<br>PA NOVO         | 1231.9  | 203912.9   | 0.0     | 0.0       | 27.8    | 4540.8    |                     |           | 27.8    | 4540.8    | 208453.7   |       |
| MT0078000 | HORIZONTE                     | 5998.6  | 1010161.1  | 0.0     | 0.0       | 626.6   | 108864.4  |                     |           | 626.6   | 108864.4  | 1119025.5  |       |
| MT0079000 | PA AVAÍ                       | 0.0     | 0.0        | 5373.7  | 239549.8  |         |           | 7360.<br>9          | 377352.6  | 7360.9  | 377352.6  | 616902.3   |       |
| MT0080000 | PA RONCADOR                   | 4217.4  | 254756.2   | 1081.4  | 83972.2   | 533.5   | 17000.0   | 2852.<br>1          | 194376.1  | 3385.6  | 211376.1  | 550104.6   |       |

|           |                                             |         |           |         |          |         |           |                |           |         |           |            |       |
|-----------|---------------------------------------------|---------|-----------|---------|----------|---------|-----------|----------------|-----------|---------|-----------|------------|-------|
| MT0081000 | PA MANAH                                    | 56789.2 | 6056574.0 | 12399.8 | 822378.1 | 8496.7  | 908547.1  | 4717<br>1.2    | 1992713.3 | 55667.9 | 2901260.4 | 9780212.5  |       |
| MT0082000 | PA MACIFE                                   | 5661.3  | 803056.2  | 1185.7  | 58163.2  | 395.9   | 57901.7   | 3321.<br>5     | 220363.0  | 3717.4  | 278264.8  | 1139484.2  |       |
| MT0083000 | PA SERRA NOVA II                            | 0.0     | 0.0       | 5262.8  | 172561.3 |         |           | 2975.<br>0     | 105073.8  | 2975.0  | 105073.8  | 277635.1   |       |
| MT0084000 | PA RANCHO AMIGO                             | 399.4   | 23134.0   | 5537.8  | 125662.8 | 231.0   | 15215.1   | 1792<br>4.4    | 436991.2  | 18155.3 | 452206.3  | 601003.1   |       |
| MT0085000 | PA CARNAÚBA                                 | 1329.2  | 224059.6  | 0.0     | 0.0      | 297.7   | 51096.6   |                |           | 297.7   | 51096.6   | 275156.2   |       |
| MT0086000 | PA CRISTO REI                               | 4055.0  | 678921.4  | 0.0     | 0.0      | 292.2   | 47966.8   |                |           | 292.2   | 47966.8   | 726888.2   |       |
| MT0087000 | PA UNIÃO DE TODOS                           | 8602.8  | 1485232.1 | 0.0     | 0.0      | 3810.5  | 702405.6  | 34.7           | 5334.8    | 3845.2  | 707740.3  | 2192972.4  |       |
| MT0088000 | PA COTREL                                   | 0.0     | 0.0       | 164.6   | 5429.8   |         |           | 700.6<br>3322. | 23112.5   | 700.6   | 23112.5   | 28542.3    |       |
| MT0089000 | PA PIRAPUTANGA                              | 0.0     | 0.0       | 709.0   | 23389.1  |         |           | 3              | 109603.3  | 3322.3  | 109603.3  | 132992.4   |       |
| MT0090000 | PA PRAIA RICA                               | 0.0     | 0.0       | 356.4   | 38167.9  |         |           | 523.2          | 55998.7   | 523.2   | 55998.7   | 94166.6    |       |
| MT0101000 | PA VÃO GRANDE                               | 84.7    | 11637.3   | 291.4   | 15937.3  | 1427.0  | 196147.2  | 421.5          | 55561.1   | 1848.5  | 251708.4  | 279283.0   | 147.8 |
| MT0102000 | PA OLARIA<br>PA CÓRREGO DA<br>ONÇA          | 1563.7  | 234265.2  | 0.0     | 0.0      | 12.1    | 1805.4    |                |           | 12.1    | 1805.4    | 236070.6   |       |
| MT0103000 | PA CORGÃO<br>PA MIRASSOLZINHO<br>II         | 8533.9  | 1039835.5 | 4.3     | 634.3    | 157.2   | 22695.1   |                |           | 157.2   | 22695.1   | 1063164.8  |       |
| MT0104000 | PA COLONIA DOS<br>MINEIROS                  | 1149.0  | 168688.0  | 0.0     | 0.0      | 5.7     | 834.4     | 526.6          | 77309.0   | 532.3   | 78143.4   | 246831.5   |       |
| MT0105000 | PA SÃO LUIZ                                 | 3616.6  | 532614.2  | 164.9   | 16306.5  | 797.9   | 120165.2  | 884.8<br>4619. | 36668.8   | 1682.6  | 156834.0  | 705754.7   |       |
| MT0106000 | PA PROVIDÊNCIA - I                          | 0.0     | 0.0       | 2818.5  | 92981.4  |         |           | 7              | 151786.7  | 4619.7  | 151786.7  | 244768.1   |       |
| MT0107000 | PA PROVIDÊNCIA III<br>PA NOVA<br>CONQUISTA  | 3314.3  | 399412.1  | 0.0     | 0.0      | 523.8   | 67531.5   | 2.2            | 313.5     | 526.0   | 67845.0   | 467257.1   |       |
| MT0108000 | PA BONJAGUÁ                                 | 1466.5  | 14666.6   | 0.0     | 0.0      |         |           | 62.4<br>2875.  | 588.0     | 62.4    | 588.0     | 15254.6    |       |
| MT0109000 | PA SANTA IZABEL<br>PA CONFRESA/RONCAD<br>OR | 9949.9  | 1478057.8 | 0.0     | 0.0      | 1761.2  | 247121.8  | 0              | 248938.2  | 4636.2  | 496060.0  | 1974117.8  |       |
| MT0110000 | PA SERRA NEGRA                              | 11264.1 | 1695705.0 | 0.0     | 0.0      | 513.2   | 77388.9   |                |           | 513.2   | 77388.9   | 1773093.9  |       |
| MT0111000 | PA CABIXI                                   | 643.9   | 108112.5  | 0.0     | 0.0      |         |           | 1223           |           | 0.0     | 0.0       | 108112.5   |       |
| MT0112000 | PA OURO BRANCO<br>PA MONTE DAS<br>OLIVEIRAS | 71669.8 | 8105466.6 | 2.7     | 210.9    | 11931.5 | 1062951.9 | 7.4            | 1849252.8 | 24168.9 | 2912204.7 | 11017882.3 |       |
| MT0113000 | PA SERRA NEGRA                              | 1455.4  | 244523.7  | 0.0     | 0.0      | 201.4   | 34316.7   |                |           | 201.4   | 34316.7   | 278840.4   |       |
| MT0114000 | PA CABIXI                                   | 3627.6  | 452102.8  | 0.0     | 0.0      | 1960.7  | 295253.0  |                |           | 1960.7  | 295253.0  | 747355.8   |       |
| MT0115000 | PA OURO BRANCO<br>PA MONTE DAS<br>OLIVEIRAS | 4065.8  | 683373.3  | 0.0     | 0.0      | 357.1   | 62077.2   |                |           | 357.1   | 62077.2   | 745450.5   | 0.3   |
| MT0116000 | PA SERRA NEGRA                              | 2905.6  | 488130.5  | 0.0     | 0.0      | 67.0    | 11461.9   |                |           | 67.0    | 11461.9   | 499592.5   | 3.9   |
| MT0117000 | PA SERRA NEGRA                              | 4609.2  | 745548.9  | 0.0     | 0.0      | 660.4   | 103075.2  | 1632.<br>1     | 252827.4  | 2292.5  | 355902.6  | 1101451.5  | 113.8 |

|           |                           |         |            |         |          |         |           |        |          |       |         |           |           |            |
|-----------|---------------------------|---------|------------|---------|----------|---------|-----------|--------|----------|-------|---------|-----------|-----------|------------|
| MT0118000 | PA BELA VISTA             | 17692.2 | 2322189.4  | 0.0     | 0.0      | 2670.7  | 284928.3  | 1229.8 | 42127.2  |       | 3900.4  | 327055.5  | 2649244.9 | 5.8        |
| MT0119000 | PA MARIA TEREZA           | 3724.7  | 403559.8   | 0.0     | 0.0      | 459.0   | 36473.7   |        |          |       | 459.0   | 36473.7   | 440033.5  |            |
| MT0120000 | PA PORTO ESPERANÇA        | 5992.3  | 835039.5   | 0.0     | 0.0      | 432.0   | 39935.4   | 2422.9 | 386614.2 |       | 2854.9  | 426549.6  | 1261589.1 |            |
| MT0121000 | PA INDEPENDENTE II        | 19537.1 | 2401441.4  | 42.7    | 1463.9   | 73.4    | 2422.3    |        |          |       | 73.4    | 2422.3    | 2405327.6 |            |
| MT0122000 | PA MACIFE II              | 10467.1 | 1687866.7  | 0.0     | 0.0      | 2829.3  | 441773.0  | 46.4   | 7106.8   |       | 2875.7  | 448879.9  | 2136746.5 |            |
| MT0123000 | PA CACHOEIRA DA UNIÃO     | 3470.7  | 490755.6   | 0.0     | 0.0      | 16.5    | 2093.8    |        |          |       | 16.5    | 2093.8    | 492849.3  |            |
| MT0124000 | PA VEREDA                 | 7816.8  | 1178977.6  | 0.0     | 0.0      | 136.2   | 20734.2   |        |          |       | 136.2   | 20734.2   | 1199711.8 |            |
| MT0125000 | PA YAMIN                  | 6416.1  | 1076639.9  | 0.0     | 0.0      | 657.3   | 110010.8  | 75.5   | 12683.3  |       | 732.9   | 122694.1  | 1199334.0 |            |
| MT0126000 | PA SÃO JOSÉ               | 93608.3 | 14246211.3 | 0.0     | 0.0      | 21913.8 | 3355711.1 |        |          | 313.7 | 47929.2 | 22227.5   | 3403640.3 | 17649851.6 |
| MT0127000 | PA TAPURAH/ITANHANGA      | 2205.9  | 354640.9   | 0.0     | 0.0      | 762.3   | 118356.9  |        |          |       | 762.3   | 118356.9  | 472997.8  |            |
| MT0128000 | PA SÃO CRISTÓVÃO          | 1503.1  | 249948.0   | 0.0     | 0.0      | 29.2    | 4910.4    | 46.1   | 7059.1   |       | 75.4    | 11969.4   | 261917.5  |            |
| MT0129000 | PA CASTANHAL              | 2617.2  | 431111.5   | 0.0     | 0.0      | 401.1   | 65417.0   | 260.2  | 42397.9  |       | 661.3   | 107815.0  | 538926.5  |            |
| MT0130000 | PA ALVORADA               | 13308.7 | 1609284.2  | 0.0     | 0.0      | 2166.3  | 202917.9  | 800.7  | 67253.5  |       | 2967.0  | 270171.4  | 1879455.5 |            |
| MT0131000 | PA INDEPENDENTE I         | 38107.4 | 5725956.4  | 0.0     | 0.0      | 13801.1 | 2106063.8 | 171.5  | 26138.3  | 56.7  | 8679.8  | 14029.3   | 2140881.9 | 7866838.3  |
| MT0132000 | PA CACHIMBO               | 0.0     | 0.0        | 871.3   | 40307.1  |         |           | 2667.6 | 111338.7 |       | 2667.6  | 111338.7  | 151645.8  | 3220.3     |
| MT0133000 | PA QUILOMBO               | 2389.5  | 399785.5   | 0.0     | 0.0      | 298.2   | 49517.2   |        |          |       | 298.2   | 49517.2   | 449302.7  | 8.5        |
| MT0134000 | PA TAPAYUNA               | 4729.1  | 678398.4   | 0.0     | 0.0      | 258.6   | 37402.5   | 1113.7 | 58080.1  |       | 1372.3  | 95482.6   | 773881.0  |            |
| MT0136000 | PA MACUCO                 | 4137.5  | 577705.5   | 0.0     | 0.0      | 2089.9  | 287907.7  | 1046.8 | 827929.6 |       | 12554.7 | 1115837.3 | 1693542.8 |            |
| MT0137000 | PA SANTA HELENA           | 11341.6 | 1691391.6  | 0.0     | 0.0      | 1344.8  | 193594.2  | 123.4  | 18100.5  |       | 1468.2  | 211694.6  | 1903086.2 |            |
| MT0138000 | PA RIO ALEGRE             | 3731.5  | 119878.0   | 15639.1 | 471506.4 | 177.8   | 5509.1    | 0.8    | 322268.8 |       | 10198.6 | 327777.9  | 919162.3  |            |
| MT0139000 | PA PIRATININGA            | 13669.5 | 1991536.1  | 0.0     | 0.0      | 9664.3  | 1530316.3 | 6307.4 | 990502.9 | 17.5  | 3277.1  | 15989.3   | 2524096.4 | 4515632.5  |
| MT0140000 | PA HORIZONTE II           | 0.0     | 0.0        | 5320.0  | 184180.1 |         |           | 1162.6 | 403036.9 |       | 11626.0 | 403036.9  | 587217.0  | 138.8      |
| MT0141000 | PA FORQUILHA DO RIO MANSO | 3827.4  | 640874.0   | 0.0     | 0.0      | 623.1   | 101768.0  |        |          |       | 623.1   | 101768.0  | 742642.0  |            |
| MT0142000 | PA COLONIA BOM JESUS      | 6545.5  | 1054699.9  | 12.4    | 2025.9   | 101.4   | 16276.3   |        |          |       | 101.4   | 16276.3   | 1073002.1 |            |
| MT0143000 | PA ITAPORÁ DO NORTE       | 5575.1  | 851380.9   | 0.0     | 0.0      | 1153.0  | 176485.2  |        |          |       | 1153.0  | 176485.2  | 1027866.1 |            |
| MT0145000 | PA IRACEMA                | 3693.6  | 519611.3   | 66.3    | 9329.9   | 77.6    | 10916.4   | 0.6    | 79.6     |       | 78.2    | 10996.0   | 539937.3  |            |
| MT0146000 | PA GERALDO PEREIRA DE     | 0.0     | 0.0        | 0.0     | 0.0      |         |           | 362.1  | 52435.9  |       | 362.1   | 52435.9   | 52435.9   |            |

|           |                                                       |         |           |         |           |         |           |       |          |           |           |           |           |
|-----------|-------------------------------------------------------|---------|-----------|---------|-----------|---------|-----------|-------|----------|-----------|-----------|-----------|-----------|
| MT0147000 | ANDRADE (MARIA<br>IZABEL)<br>PA MORRINHO DO<br>TARUMÃ | 610.1   | 20127.1   | 1.0     | 32.9      | 6.6     | 218.6     |       |          | 6.6       | 218.6     | 20378.6   |           |
| MT0148000 | PA VALE DO BACURI                                     | 1223.3  | 179599.9  | 0.0     | 0.0       |         |           |       |          | 0.0       | 0.0       | 179599.9  |           |
| MT0149000 | PA PARAISO                                            | 6234.1  | 1046644.7 | 0.0     | 0.0       | 1388.9  | 233182.0  | 633.3 | 106331.2 | 2022.2    | 339513.2  | 1386157.9 |           |
| MT0150000 | PA RONDON                                             | 0.0     | 0.0       | 744.5   | 24559.9   |         |           | 111.5 | 3677.5   | 111.5     | 3677.5    | 28237.4   |           |
| MT0151000 | PA SANTA LUZIA                                        | 0.0     | 0.0       | 15082.3 | 1643855.7 |         |           | 3623. |          |           |           |           |           |
| MT0152000 | PA SANTO<br>IDELFONSO                                 | 1696.5  | 249056.4  | 8.2     | 1204.5    | 58.4    | 8577.7    | 8     | 343516.8 | 3623.8    | 343516.8  | 1987372.5 |           |
| MT0153000 | PA TERRA FORTE                                        | 11.2    | 819.3     | 1213.5  | 68741.2   | 1.2     | 93.9      | 31.0  | 2289.5   | 32.2      | 2383.4    | 71943.9   |           |
| MT0154000 | PA PRIMAVERA                                          | 0.0     | 0.0       | 1369.4  | 66951.2   |         |           | 4.4   | 213.2    | 4.4       | 213.2     | 67164.4   |           |
| MT0155000 | PA SÃO FRANCISCO                                      | 0.0     | 0.0       | 2131.9  | 74089.0   |         |           | 241.5 | 26149.7  | 241.5     | 26149.7   | 100238.7  |           |
| MT0156000 | PA 28 DE OUTUBRO                                      | 1387.2  | 231966.0  | 0.0     | 0.0       | 254.5   | 41835.3   |       |          | 254.5     | 41835.3   | 273801.3  |           |
| MT0157000 | PA ALTO PARAISO                                       | 2164.5  | 141356.0  | 2894.4  | 124039.7  | 801.1   | 66104.6   | 145.5 | 11128.8  | 946.6     | 77233.5   | 342629.2  |           |
| MT0158000 | PA CARIMÃ                                             | 2106.1  | 313423.8  | 0.0     | 0.0       | 44.7    | 6251.4    |       |          | 44.7      | 6251.4    | 319675.2  |           |
| MT0159000 | PA ARACATY                                            | 16654.5 | 1187463.2 | 1526.0  | 82288.2   | 6232.8  | 454311.8  | 5896. | 190107.1 | 12129.3   | 644418.9  | 1914170.3 |           |
| MT0160000 | PA DOM PEDRO                                          | 744.7   | 101094.1  | 0.0     | 0.0       | 1419.3  | 209122.8  | 5     | 8634.    | 6         | 500180.9  | 810397.8  |           |
| MT0162000 | PA LARANJEIRA I                                       | 0.0     | 0.0       | 0.0     | 0.0       |         |           | 1193. |          | 6         | 39377.6   | 39377.6   |           |
| MT0163000 | PA LARANJEIRA II                                      | 7237.4  | 1084198.3 | 0.0     | 0.0       | 120.3   | 18014.7   | 0.7   | 107.8    | 121.0     | 18122.5   | 1102320.8 |           |
| MT0164000 | PA AERORANCHO                                         | 3683.0  | 107350.7  | 0.0     | 0.0       | 88.2    | 2854.8    |       |          | 88.2      | 2854.8    | 110205.5  |           |
| MT0165000 | PA MARGARIDA<br>ALVES                                 | 38.2    | 2400.4    | 371.6   | 12258.5   | 95.8    | 8900.1    | 1539  | 501710.0 | 15495.1   | 510610.1  | 525269.0  | 33.0      |
| MT0166000 | PA PAIOL                                              | 45126.3 | 6931042.8 | 0.0     | 0.0       | 10274.4 | 1615001.0 | 7888. | 7        | 1199980.7 | 18163.1   | 2814981.7 | 9746024.5 |
| MT0167000 | PA MERCEDES BENS<br>I E II                            | 1142.9  | 166802.5  | 0.0     | 0.0       | 84.8    | 11788.7   |       |          | 84.8      | 11788.7   | 178591.2  |           |
| MT0168000 | PA SANTA HELENA II                                    | 0.0     | 0.0       | 9691.7  | 456792.3  |         |           | 4802. | 296270.7 | 4802.3    | 296270.7  | 753063.1  |           |
| MT0169000 | PA CANCELA                                            | 0.0     | 0.0       | 7084.6  | 258475.3  |         |           | 1429  | 610045.0 | 14298.1   | 610045.0  | 868520.3  |           |
| MT0170000 | PA NOIDORINHO/VITÓR<br>IA                             | 16905.6 | 2234858.6 | 0.0     | 0.0       | 1242.3  | 111397.2  | 2206. | 6        | 3449.0    | 434951.0  | 2669809.6 |           |
| MT0172000 | PA MARGARIDA<br>UNIÃO                                 | 116.8   | 16256.7   | 0.0     | 0.0       | 15.9    | 2222.7    | 167.1 | 3684.1   | 183.0     | 5906.8    | 22163.5   |           |
| MT0173000 | PA BOCAINA                                            | 31322.0 | 4737180.5 | 0.0     | 0.0       | 14906.5 | 2271065.1 | 506.4 | 77079.4  | 15413.0   | 2348144.5 | 7085325.0 |           |
| MT0174000 | PA SÃO JOSÉ UNIÃO                                     | 181.9   | 23599.2   | 0.0     | 0.0       | 128.7   | 17925.4   | 344.0 | 23825.7  | 472.7     | 41751.1   | 65350.3   |           |

|           |                                             |         |           |         |          |         |           |        |           |      |         |           |           |          |
|-----------|---------------------------------------------|---------|-----------|---------|----------|---------|-----------|--------|-----------|------|---------|-----------|-----------|----------|
| MT0176000 | PA SÃO SEBASTIÃO                            | 0.9     | 28.5      | 11163.3 | 376042.6 | 16.8    | 553.0     | 2426.3 | 87466.0   |      | 2443.0  | 88019.0   | 464090.2  |          |
| MT0179000 | PA SANTA MARIA                              | 11776.3 | 1565019.1 | 0.0     | 0.0      | 782.6   | 72966.7   | 384.1  | 16755.0   |      | 1166.7  | 89721.7   | 1654740.9 |          |
| MT0180000 | PA TATUIBY                                  | 18297.7 | 2517826.9 | 0.0     | 0.0      | 4519.0  | 663762.0  | 1533   | 630083.3  |      | 19856.6 | 1293845.2 | 3811672.2 | 246.4    |
| MT0181000 | PA ANTONIO<br>CONSELHEIRO                   | 784.0   | 41938.2   | 0.0     | 0.0      | 321.0   | 24595.0   | 7.7    | 44593.4   |      | 899.5   | 69188.5   | 111126.7  |          |
| MT0183000 | PA NOVA<br>ESPERANÇA                        | 0.0     | 0.0       | 848.2   | 19466.4  | 7.5     | 579.4     |        | 13268.5   |      | 475.9   | 13847.9   | 33314.3   | 13.7     |
| MT0184000 | PA LAGO DE PEDRA                            | 615.0   | 86512.8   | 1533.8  | 215774.2 |         |           | 34.7   | 4882.5    |      | 34.7    | 4882.5    | 307169.5  |          |
| MT0185000 | PA MÁRCIO PEREIRA<br>PA FURNAS DO<br>BURITI | 0.0     | 0.0       | 282.0   | 15551.3  |         |           | 717.9  | 29968.9   |      | 717.9   | 29968.9   | 45520.2   |          |
| MT0186000 | PA SERINGAL                                 | 5367.0  | 820107.5  | 0.0     | 0.0      | 2102.7  | 321896.3  |        |           |      | 540.4   | 81066.0   | 983342.1  |          |
| MT0187000 | PA RIO BORGES                               | 2661.5  | 402962.0  | 0.0     | 0.0      | 730.5   | 111810.4  |        |           |      | 2102.7  | 321896.3  | 1142003.8 |          |
| MT0188000 | PA RIO BORGES                               | 2661.5  | 402962.0  | 0.0     | 0.0      | 730.5   | 111810.4  |        |           |      | 730.5   | 111810.4  | 514772.5  |          |
| MT0189000 | PA BONANZA                                  | 2836.7  | 434851.4  | 38.3    | 5850.8   | 238.2   | 37619.4   |        |           |      | 238.2   | 37619.4   | 478321.6  |          |
| MT0190000 | PA SANTA IRENE                              | 9241.2  | 301398.8  | 1015.6  | 30012.3  | 3061.7  | 163160.4  | 180.1  | 5934.4    | 19.9 | 656.4   | 3261.7    | 169751.2  | 501162.3 |
| MT0191000 | PA CAMPINAS                                 | 20497.2 | 3134463.7 | 0.0     | 0.0      | 10642.6 | 1629025.7 | 34.5   | 5284.4    |      | 10677.1 | 1634310.1 | 4768773.8 |          |
| MT0192000 | PA PADOVANI                                 | 6354.9  | 618125.7  | 34.6    | 4669.3   | 47.1    | 5912.8    |        |           |      | 47.1    | 5912.8    | 628707.8  |          |
| MT0193000 | PA SANTA ROSA                               | 8233.2  | 1252777.4 | 0.0     | 0.0      | 934.1   | 132105.3  |        |           |      | 934.1   | 132105.3  | 1384882.8 |          |
| MT0194000 | PA BOA VISTA                                | 1136.6  | 170098.0  | 0.0     | 0.0      | 81.8    | 12516.1   |        |           |      | 81.8    | 12516.1   | 182614.1  |          |
| MT0195000 | PA SÃO BENEDITO                             | 1797.3  | 263863.4  | 0.0     | 0.0      |         |           |        |           |      | 0.0     | 0.0       | 263863.4  |          |
| MT0196000 | PA SANTA ROSA I                             | 324.5   | 25062.3   | 0.0     | 0.0      | 235.6   | 18199.9   | 349.2  | 26973.2   |      | 584.8   | 45173.0   | 70235.3   |          |
| MT0197000 | PA JATOBÁ                                   | 100.7   | 7294.4    | 0.0     | 0.0      | 35.1    | 2626.2    | 2235.  | 104342.7  |      | 2270.4  | 106968.9  | 114263.3  |          |
| MT0198000 | PA RANCHO DA<br>SAUDADE                     | 18467.5 | 3284703.9 | 0.0     | 0.0      | 11955.8 | 2063936.1 | 325.5  | 53320.7   |      | 12281.3 | 2117256.8 | 5401960.7 | 48.9     |
| MT0199000 | PA JURUENA                                  | 13447.3 | 1930582.0 | 0.0     | 0.0      | 14563.8 | 1967572.8 | 2005.  | 33587.1   |      | 16568.9 | 2001159.9 | 3931741.9 | 25.3     |
| MT0200000 | PA ENA                                      | 6842.0  | 1046689.1 | 0.0     | 0.0      | 681.5   | 104210.7  |        |           |      | 681.5   | 104210.7  | 1150899.7 |          |
| MT0201000 | PA CALIFORNIA                               | 13920.7 | 2318881.8 | 0.0     | 0.0      | 113.9   | 18605.0   |        |           |      | 113.9   | 18605.0   | 2337486.8 |          |
| MT0202000 | PA VERANEIO                                 | 26869.5 | 4980052.9 | 0.0     | 0.0      | 7984.6  | 1491665.8 | 13.3   | 2491.3    |      | 7998.0  | 1494157.1 | 6474210.0 |          |
| MT0203000 | PA SÃO PEDRO                                | 822.2   | 125313.4  | 0.0     | 0.0      | 45.8    | 6979.3    | 9781.  | 1269180.6 |      | 9827.3  | 1276159.9 | 1401473.4 |          |
| MT0204000 | PE NOVA FLORESTA                            | 5477.2  | 816469.4  | 0.0     | 0.0      | 1126.1  | 163916.1  | 5      | 34761.0   |      | 1357.9  | 198677.1  | 1015146.6 |          |
| MT0207000 | PA RITINHA                                  | 2359.6  | 354009.8  | 42.2    | 6411.5   | 178.9   | 27351.6   |        |           |      | 178.9   | 27351.6   | 387773.0  |          |
| MT0209000 | PA MOGIANA I                                | 2528.7  | 385948.4  | 45.4    | 6948.5   | 473.1   | 72424.8   |        |           |      | 473.1   | 72424.8   | 465321.8  |          |

|           |                                |         |           |         |          |         |           |        |          |         |           |           |       |
|-----------|--------------------------------|---------|-----------|---------|----------|---------|-----------|--------|----------|---------|-----------|-----------|-------|
| MT0210000 | PA FURNAS III                  | 93.4    | 11371.0   | 18519.4 | 516085.6 | 237.5   | 26199.0   | 1352.5 | 103762.4 | 1590.0  | 129961.4  | 657418.0  | 2.8   |
| MT0212000 | PA JARAGUÁ                     | 17119.4 | 2362365.5 | 0.0     | 0.0      | 4837.6  | 594685.2  | 6470.6 | 210701.2 | 11308.2 | 805386.4  | 3167751.9 | 87.6  |
| MT0213000 | PA BRASIL NOVO                 | 4045.4  | 472009.8  | 0.0     | 0.0      | 2108.4  | 292370.5  | 1097.4 | 168000.5 | 3205.7  | 460370.9  | 932380.8  |       |
| MT0217000 | PA IRIRIZINHO                  | 0.0     | 0.0       | 587.3   | 18362.3  |         |           | 379.6  | 12361.4  | 379.6   | 12361.4   | 30723.7   |       |
| MT0219000 | PA CAMPO LIMPO                 | 0.0     | 0.0       | 2679.6  | 88398.6  |         |           | 2046.0 | 67482.6  | 2046.0  | 67482.6   | 155881.2  |       |
| MT0221000 | PA SADIA III                   | 1271.6  | 189553.6  | 0.0     | 0.0      | 470.7   | 69825.6   | 716.8  | 41533.6  | 1187.5  | 111359.2  | 300912.7  |       |
| MT0223000 | PA RIOZINHO                    | 1223.8  | 160404.3  | 1.1     | 145.9    |         |           |        |          | 0.0     | 0.0       | 160550.2  |       |
| MT0224000 | PA COQUEIRO                    | 0.0     | 0.0       | 1423.3  | 87524.1  |         |           | 51.6   | 6960.4   | 51.6    | 6960.4    | 94484.5   |       |
| MT0225000 | PA DOIS IRMÃOS                 | 0.0     | 0.0       | 0.0     | 0.0      |         |           | 2353.0 | 91783.9  | 2353.0  | 91783.9   | 91783.9   |       |
| MT0227000 | PA VALE DO SOL                 | 0.0     | 0.0       | 2636.0  | 160402.5 |         |           | 481.9  | 37364.6  | 481.9   | 37364.6   | 197767.1  |       |
| MT0228000 | PA PADRE JOSIMO TAVARES        | 0.0     | 0.0       | 1957.3  | 64572.5  |         |           | 302.6  | 9984.1   | 302.6   | 9984.1    | 74556.5   | 8.9   |
| MT0230000 | PA ESTRELA DO ORIENTE          | 0.0     | 0.0       | 3701.8  | 121261.6 |         |           | 1352.3 | 40276.8  | 1352.3  | 40276.8   | 161538.4  |       |
| MT0231000 | PA SANTO ANTONIO               | 3382.1  | 450302.0  | 0.0     | 0.0      | 4005.9  | 451846.4  | 2350.6 | 36924.4  | 6356.5  | 488770.8  | 939072.8  | 86.7  |
| MT0232000 | PA SANTA TEREZINHA II          | 21022.9 | 3030090.2 | 0.0     | 0.0      | 11030.4 | 1349182.2 |        |          | 11030.4 | 1349182.2 | 4379272.4 |       |
| MT0233000 | PA BOA ESPERANÇA I, II E III   | 28332.5 | 4279169.4 | 0.0     | 0.0      | 8973.4  | 1351215.6 | 1507.5 | 94952.6  | 10480.8 | 1446168.1 | 5725337.5 |       |
| MT0234000 | PA PINGOS D'ÁGUA               | 0.0     | 0.0       | 4141.1  | 136615.4 |         |           | 1191.7 | 39315.1  | 1191.7  | 39315.1   | 175930.5  |       |
| MT0235000 | PA NOSSA SENHORA DO CARMO      | 12800.1 | 1973657.2 | 304.0   | 49837.3  | 950.8   | 154671.3  | 62.8   | 10230.2  | 1013.5  | 164901.4  | 2188396.0 |       |
| MT0236000 | PA SÃO JOSÉ DA VILA RICA       | 10413.5 | 1710674.4 | 0.0     | 0.0      | 1359.1  | 221552.0  |        |          | 1359.1  | 221552.0  | 1932226.4 |       |
| MT0237000 | PA IPE                         | 30598.6 | 3377344.3 | 0.0     | 0.0      | 10483.3 | 890918.9  | 513.3  | 39647.4  | 10996.6 | 930566.3  | 4307910.5 |       |
| MT0239000 | PA SANTO ANTONIO DO FONTOURA I | 9684.1  | 588409.5  | 0.0     | 0.0      | 8687.6  | 573594.9  | 626.3  | 46590.4  | 9313.9  | 620185.3  | 1208594.8 | 343.6 |
| MT0240000 | PA SANTA CLARA                 | 5273.1  | 470712.3  | 0.0     | 0.0      | 2926.3  | 216959.4  | 836.2  | 67963.8  | 3762.4  | 284923.2  | 755635.5  | 82.0  |
| MT0241000 | PA BRASIPAIVA I E II           | 19400.2 | 2921117.0 | 4527.9  | 655775.7 | 10.0    | 1517.5    | 1176.3 | 161314.7 | 1186.2  | 162832.1  | 3739724.8 | 11.0  |
| MT0242000 | PA MÃE MARIA                   | 27114.3 | 4437477.7 | 0.0     | 0.0      | 8005.8  | 1313579.2 | 31.6   | 5148.2   | 8037.4  | 1318727.4 | 5756205.1 | 3.3   |
| MT0243000 | PA VALE DO SERINGAL            | 6668.4  | 1245746.6 | 0.0     | 0.0      | 8048.5  | 1504175.8 |        |          | 8048.5  | 1504175.8 | 2749922.4 | 1.2   |
| MT0244000 | PA VALE DO AMANHECER           | 2556.8  | 363871.3  | 374.6   | 12433.6  | 365.9   | 55774.0   |        |          | 365.9   | 55774.0   | 432078.9  |       |
| MT0247000 | PA SANTA LUZIA I               | 3153.7  | 478490.8  | 14.0    | 2117.6   | 557.4   | 85326.9   |        |          | 557.4   | 85326.9   | 565935.3  |       |
| MT0248000 | PA CRISTALMEL                  | 11.0    | 362.8     | 2488.3  | 43152.5  | 272.8   | 8999.3    | 372.4  | 11921.0  | 645.2   | 20920.3   | 64435.6   |       |

|           |                            |         |           |        |          |         |           |        |           |         |           |            |      |
|-----------|----------------------------|---------|-----------|--------|----------|---------|-----------|--------|-----------|---------|-----------|------------|------|
| MT0249000 | PA GUAPIRAMA               | 3449.8  | 527192.3  | 0.0    | 0.0      | 621.2   | 95099.9   |        |           | 621.2   | 95099.9   | 622292.2   |      |
| MT0250000 | PA BOGORNI                 | 1993.6  | 212423.2  | 0.0    | 0.0      | 305.2   | 25667.3   |        |           | 305.2   | 25667.3   | 238090.4   |      |
| MT0251000 | PA SAO FRANCISCO II        | 1359.9  | 206701.4  | 11.9   | 1823.3   | 100.8   | 15424.8   |        |           | 100.8   | 15424.8   | 223949.5   |      |
| MT0252000 | PA MOGIANA II              | 1585.5  | 296311.3  | 0.0    | 0.0      | 2884.4  | 539071.6  | 761.3  | 142280.0  | 3645.7  | 681351.6  | 977663.0   |      |
| MT0253000 | PA ESCONDIDO               | 1181.2  | 180773.0  | 0.0    | 0.0      |         |           |        |           | 0.0     | 0.0       | 180773.0   |      |
| MT0256000 | PA BOSMAJI                 | 1924.4  | 294625.7  | 0.0    | 0.0      | 10.3    | 1577.6    |        |           | 10.3    | 1577.6    | 296203.3   |      |
| MT0257000 | PA CARACOL                 | 2748.3  | 420726.6  | 0.0    | 0.0      | 289.3   | 44290.1   |        |           | 289.3   | 44290.1   | 465016.7   |      |
| MT0258000 | PA JULIETA II              | 646.9   | 26891.2   | 0.0    | 0.0      | 2.7     | 184.9     | 1879.7 | 68097.4   | 1882.4  | 68282.4   | 95173.6    |      |
| MT0262000 | PA RIO BRANCO              | 1639.1  | 229327.6  | 19.3   | 2721.8   | 1.0     | 137.1     | 41.3   | 5806.6    | 42.2    | 5943.7    | 237993.1   |      |
| MT0263000 | PA SANTO ANTONIO DA ALDEIA | 10238.9 | 1530580.4 | 0.0    | 0.0      | 2145.4  | 325970.4  | 300.9  | 18869.0   | 2446.3  | 344839.4  | 1875419.8  |      |
| MT0264000 | PA SÃO MANOEL              | 20917.2 | 3179160.2 | 0.0    | 0.0      | 6138.4  | 986312.3  | 236.1  | 39401.9   | 6374.5  | 1025714.2 | 4204874.4  | 96.2 |
| MT0265000 | PA PONTAL DO MARAPE        | 33.8    | 2608.5    | 742.7  | 26802.1  | 32.0    | 2474.6    | 899.9  | 31311.5   | 931.9   | 33786.1   | 63196.6    | 33.8 |
| MT0268000 | PA SANTA HELENA III        | 860.3   | 84183.4   | 301.4  | 35842.0  | 411.2   | 32496.0   | 3222.3 | 139211.2  | 3633.4  | 171707.2  | 291732.6   |      |
| MT0269000 | PA SANTANA DO TAQUARAL     | 336.2   | 27235.4   | 0.0    | 0.0      | 144.7   | 12098.8   | 1643.5 | 131039.6  | 1788.2  | 143138.4  | 170373.8   |      |
| MT0274000 | PA BARRANQUEIRA            | 2742.8  | 394434.6  | 0.0    | 0.0      | 149.6   | 22428.8   |        |           | 149.6   | 22428.8   | 416863.4   |      |
| MT0275000 | PA SÃO SATURNINO           | 7902.8  | 1146588.3 | 0.0    | 0.0      | 1618.3  | 233941.4  | 679.5  | 95719.1   | 2297.8  | 329660.5  | 1476248.8  |      |
| MT0278000 | PA ROSELI NUNES            | 13707.7 | 2116075.0 | 1169.0 | 182221.7 | 5060.5  | 789896.1  |        |           | 5060.5  | 789896.1  | 3088192.8  |      |
| MT0279000 | PA SANTANA DA ÁGUA LIMPA   | 385.9   | 55727.6   | 0.0    | 0.0      | 175.1   | 25566.6   | 620.1  | 48364.5   | 795.2   | 73931.1   | 129658.7   |      |
| MT0282000 | PA IPÊ ROXO                | 793.4   | 47950.4   | 43.1   | 2264.1   | 126.1   | 7548.3    | 7.4    | 242.5     | 133.5   | 7790.8    | 58005.3    |      |
| MT0292000 | PA RIBEIRÃO DA GLÓRIA      | 0.0     | 0.0       | 1079.2 | 36218.5  |         |           | 714.1  | 24869.5   | 714.1   | 24869.5   | 61088.0    |      |
| MT0293000 | PA ALMINHAS                | 0.0     | 0.0       | 1020.2 | 92848.5  |         |           | 322.8  | 27724.7   | 322.8   | 27724.7   | 120573.2   |      |
| MT0294000 | PA TAMBORIL                | 811.9   | 136306.3  | 0.0    | 0.0      | 8.6     | 1447.7    |        |           | 8.6     | 1447.7    | 137754.0   |      |
| MT0295000 | PA UNIÃO FLOR DA SERRA     | 33107.5 | 5783138.0 | 0.0    | 0.0      | 22245.5 | 3920149.3 | 7513.4 | 1395807.8 | 29759.0 | 5315957.1 | 11099095.1 |      |
| MT0297000 | PA JAPURANÃ                | 9392.8  | 930252.3  | 0.0    | 0.0      | 818.7   | 119729.5  | 733.1  | 108600.1  | 1551.8  | 228329.6  | 1158581.8  |      |
| MT0299000 | PA TRIUNFO                 | 0.0     | 0.0       | 2944.8 | 53668.8  |         |           | 5791.7 | 149658.0  | 5791.7  | 149658.0  | 203326.7   |      |
| MT0300000 | PA COLORADO                | 0.0     | 0.0       | 322.2  | 45332.8  |         |           | 64.3   | 9051.0    | 64.3    | 9051.0    | 54383.8    |      |
| MT0301000 | PA ÁGUAS DA SERRA          | 2657.6  | 352863.2  | 106.9  | 15045.4  | 102.5   | 14423.7   | 237.0  | 30594.7   | 339.5   | 45018.4   | 412927.1   |      |
| MT0303000 | PA 17 DE MARÇO             | 3370.0  | 565808.5  | 0.0    | 0.0      | 28.5    | 4779.9    |        |           | 28.5    | 4779.9    | 570588.4   |      |

|           |                                     |         |           |        |          |         |           |        |          |         |           |           |          |
|-----------|-------------------------------------|---------|-----------|--------|----------|---------|-----------|--------|----------|---------|-----------|-----------|----------|
| MT0304000 | PA COLNIZA - II                     | 31637.2 | 5858834.8 | 0.0    | 0.0      | 12310.2 | 2281840.1 |        |          | 12310.2 | 2281840.1 | 8140674.8 |          |
| MT0305000 | PA COLNIZA-I                        | 17995.3 | 3014723.2 | 0.0    | 0.0      | 8749.5  | 1475728.5 |        |          | 8749.5  | 1475728.5 | 4490451.8 |          |
| MT0306000 | PA ESCOL SUL                        | 8111.2  | 1483059.3 | 0.0    | 0.0      | 4164.9  | 771100.6  |        |          | 4164.9  | 771100.6  | 2254159.9 | 113.6    |
| MT0307000 | PA NATAL                            | 2074.4  | 342122.0  | 0.0    | 0.0      | 220.8   | 35982.5   |        |          | 220.8   | 35982.5   | 378104.5  |          |
| MT0308000 | PA SÃO GABRIEL                      | 0.0     | 0.0       | 1306.3 | 43588.7  | 0.6     | 48.9      | 771.2  | 26019.0  | 771.9   | 26067.9   | 69656.6   |          |
| MT0309000 | PA RAIZAMA                          | 0.0     | 0.0       | 964.5  | 31819.2  |         |           | 573.1  | 18905.4  | 573.1   | 18905.4   | 50724.6   |          |
| MT0311000 | PA CÔRREGO RICO                     | 1966.1  | 293985.3  | 3743.6 | 193700.0 | 2079.3  | 317332.6  | 756.7  | 102154.0 | 2836.0  | 419486.6  | 907171.8  |          |
| MT0312000 | PA PALOMA                           | 0.0     | 0.0       | 0.0    | 0.0      |         |           | 3352.3 |          |         |           |           |          |
| MT0313000 | PA CORIXO                           | 394.1   | 19533.3   | 0.0    | 0.0      | 52.5    | 3645.1    | 842.4  | 49053.7  | 894.9   | 52698.9   | 72232.2   |          |
| MT0314000 | PA SAPICUÁ                          | 0.0     | 0.0       | 0.0    | 0.0      |         |           | 1140.5 |          |         |           |           |          |
| MT0315000 | PA LIMOEIRO                         | 9010.0  | 750906.2  | 0.0    | 0.0      | 3296.8  | 324188.5  |        |          | 3296.8  | 324188.5  | 1075094.7 | 48.1     |
| MT0316000 | PA SANTO ANTONIO DO FONTOURA III    | 877.5   | 123351.7  | 11.4   | 1496.5   | 61.8    | 8687.1    | 0.6    | 85.9     | 62.4    | 8772.9    | 133621.2  |          |
| MT0321000 | PA JOÃO DE BARRO                    | 1456.7  | 204926.5  | 1236.3 | 166535.2 |         |           | 115.2  | 16201.7  | 115.2   | 16201.7   | 387663.5  |          |
| MT0322000 | PA JOÃO PESSOA                      | 544.9   | 76658.4   | 34.6   | 4872.5   | 10.5    | 1480.9    | 124.2  | 17476.5  | 134.8   | 18957.4   | 100488.3  |          |
| MT0324000 | PA TIETÊ                            | 3764.9  | 267720.4  | 1063.8 | 45006.8  | 289.8   | 37144.3   | 123.9  | 11036.5  | 413.7   | 48180.8   | 360908.0  | 1.3      |
| MT0325000 | PA CARLOS MARIGHELA-PONTAL DA AREIA | 0.0     | 0.0       | 991.3  | 38439.5  |         |           | 289.9  | 14495.1  | 289.9   | 14495.1   | 52934.6   |          |
| MT0326000 | PA SANTO ANTONIO DO NORTE           | 1687.0  | 250405.6  | 0.0    | 0.0      | 411.3   | 59714.0   |        |          | 411.3   | 59714.0   | 310119.6  |          |
| MT0329000 | PA LAGOA RICA                       | 2987.0  | 438538.0  | 91.0   | 13363.2  | 618.6   | 90812.6   |        |          | 618.6   | 90812.6   | 542713.8  |          |
| MT0330000 | PA CEDRO ROSA                       | 10000.6 | 1633595.2 | 0.0    | 0.0      | 2444.9  | 398494.7  |        |          | 2444.9  | 398494.7  | 2032090.0 |          |
| MT0331000 | PA SANTO ANTONIO DO BELEZA          | 4213.8  | 445351.8  | 1799.2 | 70722.1  | 372.9   | 45066.3   | 492.1  | 45053.0  | 865.0   | 90119.4   | 606193.3  |          |
| MT0339000 | PA BELEZA                           | 3012.2  | 325768.9  | 2460.1 | 68711.7  | 835.0   | 112940.4  | 1214.6 |          | 2049.6  | 208565.0  | 603045.6  |          |
| MT0344000 | PA SANTO ANTONIO DA FARTURA         | 4148.7  | 616141.9  | 49.5   | 7860.1   | 4392.2  | 715165.3  | 447.8  | 72979.1  | 13.8    | 2255.5    | 4853.9    | 790399.8 |
| MT0345000 | PA CHACORORÉ                        | 2691.2  | 490305.9  | 0.0    | 0.0      | 413.3   | 77004.4   |        |          | 413.3   | 77004.4   | 567310.3  |          |
| MT0346000 | PA MONTE VERDE                      | 1055.2  | 116731.2  | 391.1  | 19152.6  | 626.8   | 82308.4   | 951.3  | 34732.8  | 1578.1  | 117041.2  | 252925.0  |          |
| MT0347000 | PA PONTAL DO GLÓRIA                 | 18748.3 | 1952557.3 | 0.0    | 0.0      | 4641.9  | 422370.7  | 1812.5 | 221883.3 | 6454.4  | 644254.0  | 2596811.3 |          |
| MT0349000 | PA SÃO VICENTE                      | 40040.0 | 5925591.2 | 0.0    | 0.0      | 9407.3  | 1418962.7 | 61.5   | 9165.3   | 9468.8  | 1428128.0 | 7353719.2 |          |
| MT0356000 | PA CACHIMBO II                      | 12455.0 | 1884780.0 | 1087.0 | 172809.9 | 739.4   | 117188.5  |        |          | 739.4   | 117188.5  | 2174778.3 | 68.3     |



|           |                                 |         |          |        |          |         |           |        |          |          |         |           |           |         |
|-----------|---------------------------------|---------|----------|--------|----------|---------|-----------|--------|----------|----------|---------|-----------|-----------|---------|
| MT0360000 | PA JURUENA I                    | 0.0     | 0.0      | 577.1  | 12051.4  |         |           | 2426.2 | 61478.1  |          | 2426.2  | 61478.1   | 73529.5   |         |
| MT0361000 | PA AGROANA/GIRAU                | 6.5     | 918.6    | 843.5  | 118665.6 |         |           | 486.3  | 68413.8  |          | 486.3   | 68413.8   | 187998.0  |         |
| MT0364000 | PA WILSON<br>MEDEIROS           | 1466.9  | 245187.7 | 0.0    | 0.0      | 509.1   | 85823.4   |        |          |          | 509.1   | 85823.4   | 331011.1  | 4.1     |
| MT0366000 | PA VALE DA<br>ESPERANÇA         | 0.0     | 0.0      | 0.0    | 0.0      | 109.4   | 14145.6   | 5497.0 |          | 175096.0 | 5606.4  | 189241.6  | 189241.6  |         |
| MT0443000 | PE JOÃO PONCE DE<br>ARRUDA      | 4076.0  | 605684.5 | 0.0    | 0.0      | 280.9   | 42957.3   |        |          |          | 280.9   | 42957.3   | 648641.9  |         |
| MT0444000 | PA FLORESTAN<br>FERNANDES       | 1313.2  | 202637.0 | 0.0    | 0.0      | 897.2   | 138688.3  |        |          |          | 897.2   | 138688.3  | 341325.3  |         |
| MT0457000 | PA POUSO ALEGRE                 | 1134.2  | 164061.5 | 0.0    | 0.0      | 1.2     | 174.9     |        |          |          | 1.2     | 174.9     | 164236.5  |         |
| MT0458000 | PA SANTO EXPEDITO               | 0.0     | 0.0      | 3029.6 | 143827.5 |         |           | 2239.4 |          | 100398.8 | 2239.4  | 100398.8  | 244226.4  |         |
| MT0468000 | PA SANTA CÁSSIA                 | 699.9   | 102753.7 | 65.7   | 9639.4   | 187.9   | 27588.8   |        |          |          | 187.9   | 27588.8   | 139981.9  |         |
| MT0470000 | PA 04 DE OUTUBRO                | 125.8   | 17695.8  | 500.5  | 52979.1  |         |           | 124.4  | 11718.0  |          | 124.4   | 11718.0   | 82392.9   |         |
| MT0471000 | PA SALETE<br>STROZAK            | 0.0     | 0.0      | 1079.3 | 35605.7  |         |           | 3.6    | 117.2    |          | 3.6     | 117.2     | 35722.9   |         |
| MT0472000 | PA DORCELINA<br>FOLADOR         | 0.0     | 0.0      | 663.3  | 20228.6  |         |           | 3626.2 |          | 103870.0 | 3626.2  | 103870.0  | 124098.6  |         |
| MT0473000 | PA FRANCISCO JOSÉ<br>NASCIMENTO | 758.0   | 75877.4  | 815.6  | 41799.7  | 178.5   | 12991.1   | 702.3  | 33800.9  |          | 880.8   | 46791.9   | 164469.1  |         |
| MT0477000 | PE SALTINHO<br>PA MARIA DE      | 51.5    | 7564.2   | 178.8  | 26224.6  | 197.0   | 20864.7   | 62.6   | 9058.8   |          | 259.6   | 29923.4   | 63712.3   |         |
| MT0478000 | OLIVEIRA                        | 1203.7  | 156026.2 | 107.1  | 14389.9  | 434.8   | 55862.9   | 4.0    | 589.4    |          | 438.8   | 56452.2   | 226868.3  |         |
| MT0479000 | PA MARIA DE<br>OLIVEIRA I       | 446.7   | 59070.6  | 5410.2 | 226682.7 | 1196.5  | 151969.9  | 2688.0 | 107696.9 |          | 3884.5  | 259666.7  | 545420.1  |         |
| MT0481000 | PA CAETÉ                        | 3307.4  | 534429.6 | 0.0    | 0.0      | 10620.4 | 1693223.2 | 2216.9 | 346440.4 |          | 12837.3 | 2039663.6 | 2574093.2 |         |
| MT0486000 | PE VIDA NOVA                    | 5677.0  | 823411.1 | 0.0    | 0.0      | 3102.9  | 432328.2  | 5118.3 | 317671.9 |          | 8221.2  | 750000.0  | 1573411.1 | 18.9    |
| MT0491000 | PA GUAPORÉ<br>PA NOSSA SENHORA  | 0.0     | 0.0      | 503.4  | 10152.1  | 21.1    | 1632.3    | 4.4    | 338.7    | 43.2     | 3336.0  | 68.7      | 5307.0    | 15459.1 |
| MT0492000 | APARECIDA                       | 2906.7  | 475169.2 | 0.0    | 0.0      | 752.2   | 126376.3  |        |          |          | 752.2   | 126376.3  | 601545.5  |         |
| MT0494000 | PA BARRA NORTE                  | 6450.1  | 986399.1 | 230.5  | 35243.2  | 683.3   | 104593.6  |        |          |          | 683.3   | 104593.6  | 1126235.9 |         |
| MT0495000 | PA JONAS PINHEIRO               | 5299.8  | 563930.5 | 0.0    | 0.0      | 947.7   | 77968.0   | 4181.2 | 457777.9 |          | 5128.9  | 535745.9  | 1099676.5 |         |
| MT0604000 | PE RP<br>PA SERRA DA            | 135.7   | 5891.5   | 1255.7 | 142385.9 | 312.2   | 15455.5   | 869.6  | 49371.1  |          | 1181.8  | 64826.6   | 213104.0  |         |
| MT0606000 | ESPERANÇA                       | 10167.2 | 978436.8 | 45.9   | 1810.6   | 396.3   | 32539.7   | 2.4    | 284.3    |          | 398.7   | 32824.0   | 1013071.5 | 2.2     |
| MT0607000 | PA GUERREIRO                    | 1069.4  | 144133.6 | 0.0    | 0.0      | 30.6    | 4387.0    | 413.9  | 15773.8  |          | 444.5   | 20160.8   | 164294.4  |         |
| MT0608000 | PA GAVIÃO<br>PA CECILIA         | 1055.6  | 152970.9 | 0.0    | 0.0      | 102.2   | 14227.6   |        |          |          | 102.2   | 14227.6   | 167198.5  |         |
| MT0609000 | ANTUNES                         | 0.0     | 0.0      | 229.4  | 7568.8   |         |           | 4279.2 |          | 141169.8 | 4279.2  | 141169.8  | 148738.6  |         |

|           |                                                                            |         |           |         |           |        |           |        |          |         |           |           |       |
|-----------|----------------------------------------------------------------------------|---------|-----------|---------|-----------|--------|-----------|--------|----------|---------|-----------|-----------|-------|
| MT0610000 | PA NOSSA SENHORA<br>DA ESPERANÇA<br>PA TEODOMIRO<br>FERREIRA DOS<br>SANTOS | 9468.6  | 1578799.7 | 0.0     | 0.0       | 1942.5 | 317222.3  |        |          | 1942.5  | 317222.3  | 1896022.0 |       |
| MT0615000 |                                                                            | 0.0     | 0.0       | 569.3   | 32897.0   |        |           | 819.8  | 57666.1  | 819.8   | 57666.1   | 90563.1   |       |
| MT0616000 | PA SANTA EMILIA                                                            | 300.2   | 9981.2    | 347.4   | 11505.1   | 391.0  | 12920.5   | 63.8   | 2107.9   | 454.8   | 15028.4   | 36514.7   |       |
| MT0621000 | PA RIO PRETO                                                               | 2082.8  | 118090.0  | 78.1    | 2958.1    | 951.4  | 46533.4   | 2      | 114906.1 | 2172.6  | 161439.6  | 282487.7  |       |
| MT0626000 | PA TABAJARA                                                                | 1.2     | 94.5      | 0.0     | 0.0       | 10.5   | 811.6     | 422.8  | 32656.3  | 433.3   | 33467.9   | 33562.5   |       |
| MT0627000 | PA BOM SUCESSO                                                             | 12495.8 | 2089776.6 | 0.0     | 0.0       | 4040.9 | 671329.9  |        |          | 4040.9  | 671329.9  | 2761106.4 | 261.3 |
| MT0628000 | PA RENASCER                                                                | 0.0     | 0.0       | 153.7   | 1447.5    |        |           | 193.1  | 2420.5   | 193.1   | 2420.5    | 3867.9    |       |
| MT0629000 | PA FLEXAS<br>PA SADIA VALE<br>VERDE                                        | 0.0     | 0.0       | 8849.0  | 291928.9  |        |           | 4731.2 | 156083.8 | 4731.2  | 156083.8  | 448012.8  | 97.4  |
| MT0634000 |                                                                            | 0.0     | 0.0       | 2930.1  | 173588.6  |        |           | 1850.4 | 119519.2 | 1850.4  | 119519.2  | 293107.8  |       |
| MT0635000 | PA SANTA CRUZ<br>PA RAIMUNDO<br>ROCHA                                      | 5779.3  | 639925.5  | 101.1   | 13319.3   | 858.4  | 91900.3   | 4.4    | 145.5    | 862.8   | 92045.9   | 745290.7  |       |
| MT0636000 |                                                                            | 0.0     | 0.0       | 6390.3  | 368625.3  |        |           | 3591.4 | 236561.3 | 3591.4  | 236561.3  | 605186.6  |       |
| MT0639000 | PA SANTA CELIA                                                             | 1276.3  | 214281.3  | 0.0     | 0.0       |        |           |        |          | 0.0     | 0.0       | 214281.3  |       |
| MT0640000 | PA BELMONTE                                                                | 14016.4 | 2348025.6 | 0.0     | 0.0       | 6506.0 | 1123336.7 | 2      | 419245.0 | 8984.2  | 1542581.7 | 3890607.2 | 6.2   |
| MT0641000 | PA VALE DO ARINOS                                                          | 0.0     | 0.0       | 804.8   | 26550.5   |        |           | 268.4  | 8855.3   | 268.4   | 8855.3    | 35405.8   |       |
| MT0642000 | PA BR-070                                                                  | 0.0     | 0.0       | 28780.1 | 1008721.9 | 0.4    | 13.4      | 1563.5 | 613232.2 | 15635.7 | 613245.6  | 1621967.5 | 306.1 |
| MT0643000 | PE AGUIA                                                                   | 0.0     | 0.0       | 1144.1  | 130133.7  |        |           | 1414.1 | 136896.8 | 1414.1  | 136896.8  | 267030.5  |       |
| MT0644000 | PE KARAJAS                                                                 | 0.0     | 0.0       | 2257.0  | 132876.8  |        |           | 4672.7 | 233168.9 | 4672.7  | 233168.9  | 366045.8  |       |
| MT0645000 | PE BORORO                                                                  | 16.1    | 1244.8    | 605.7   | 27665.5   | 31.4   | 2421.7    | 979.1  | 57108.7  | 1010.5  | 59530.4   | 88440.7   | 125.6 |
| MT0646000 | PE SOCO                                                                    | 69.5    | 5338.6    | 1120.8  | 40475.2   | 114.2  | 8822.2    | 1165.5 | 57473.9  | 1279.7  | 66296.1   | 112109.9  | 96.2  |
| MT0647000 | PE XORORÓ                                                                  | 0.0     | 0.0       | 130.3   | 4936.4    |        |           | 999.9  | 38474.8  | 999.9   | 38474.8   | 43411.3   | 18.6  |
| MT0648000 | PE KADVEL                                                                  | 0.0     | 0.0       | 545.8   | 18789.7   |        |           | 1102.7 | 36378.9  | 1102.7  | 36378.9   | 55168.6   |       |
| MT0649000 | PE XAVANTE - I                                                             | 0.0     | 0.0       | 74.4    | 2454.6    |        |           | 17.6   | 581.5    | 17.6    | 581.5     | 3036.1    |       |
| MT0650000 | PE TUPINAMBÁ                                                               | 0.0     | 0.0       | 1226.0  | 56053.0   |        |           | 1155.8 | 53183.7  | 1155.8  | 53183.7   | 109236.7  | 80.7  |
| MT0651000 | PE TIJUCA                                                                  | 0.0     | 0.0       | 778.8   | 25693.1   |        |           | 160.9  | 5309.5   | 160.9   | 5309.5    | 31002.6   |       |
| MT0652000 | PE TAMOIO<br>PE FORQUILHA DO<br>RIO ARRUDA                                 | 0.0     | 0.0       | 4002.1  | 151722.4  |        |           | 8608.3 | 293909.6 | 8608.3  | 293909.6  | 445632.0  | 65.7  |
| MT0653000 |                                                                            | 0.0     | 0.0       | 38.6    | 1961.5    |        |           | 76.9   | 5832.2   | 76.9    | 5832.2    | 7793.7    |       |
| MT0654000 | PE TUCANO                                                                  | 0.0     | 0.0       | 862.6   | 48621.0   |        |           | 1279.1 | 87235.8  | 1279.1  | 87235.8   | 135856.8  |       |

|           |                                 |        |          |        |          |        |          |                |          |        |          |           |       |
|-----------|---------------------------------|--------|----------|--------|----------|--------|----------|----------------|----------|--------|----------|-----------|-------|
| MT0655000 | PE MANDIOCAL                    | 0.0    | 0.0      | 438.5  | 14464.8  |        |          | 284.1          | 9373.2   | 284.1  | 9373.2   | 23837.9   |       |
| MT0656000 | PE CANARIO                      | 0.0    | 0.0      | 291.2  | 9606.4   |        |          | 216.4          | 7137.6   | 216.4  | 7137.6   | 16744.0   |       |
| MT0657000 | PE BAKAIRI                      | 0.0    | 0.0      | 686.3  | 17777.0  |        |          | 503.4          | 11066.1  | 503.4  | 11066.1  | 28843.1   | 0.2   |
| MT0658000 | PE JOÃO DE BARRO                | 720.5  | 66131.5  | 183.0  | 17473.9  | 696.5  | 57387.5  | 5.9            | 456.8    | 702.4  | 57844.4  | 141449.8  |       |
| MT0667000 | PA RIBEIRÃO<br>GRANDE - III     | 2.5    | 174.9    | 0.0    | 0.0      | 80.1   | 4751.3   | 1813.<br>2     | 93533.6  | 1893.3 | 98284.8  | 98459.7   |       |
| MT0668000 | PA KATIRA                       | 0.0    | 0.0      | 3967.3 | 136848.3 |        |          | 2422.<br>9     | 85875.1  | 2422.9 | 85875.1  | 222723.4  | 23.1  |
| MT0683000 | PE PERDIZ                       | 0.0    | 0.0      | 279.2  | 9209.2   |        |          | 440.1<br>9849. | 14519.9  | 440.1  | 14519.9  | 23729.1   |       |
| MT0684000 | PE CARDEAL                      | 29.5   | 2275.8   | 5491.3 | 275630.0 | 150.5  | 11625.2  | 2              | 474860.0 | 9999.7 | 486485.2 | 764391.0  | 123.9 |
| MT0686000 | PE BELGA                        | 0.0    | 0.0      | 197.5  | 6534.9   |        |          | 294.6<br>1356. | 9719.1   | 294.6  | 9719.1   | 16253.9   |       |
| MT0687000 | PE PAVÃO                        | 202.1  | 13367.7  | 1070.0 | 36916.8  | 253.9  | 17579.0  | 0              | 52674.6  | 1609.9 | 70253.6  | 120538.2  | 74.8  |
| MT0688000 | PE CURIO                        | 2983.4 | 434799.3 | 53.8   | 7392.7   | 3690.5 | 524623.0 | 534.5<br>3997. | 73460.3  | 4225.0 | 598083.4 | 1040275.3 | 12.5  |
| MT0689000 | PA CABAÇAS                      | 0.0    | 0.0      | 622.1  | 20523.0  |        |          | 1              | 131865.4 | 3997.1 | 131865.4 | 152388.4  |       |
| MT0693000 | PE CASCAVEL                     | 0.0    | 0.0      | 156.6  | 5167.1   |        |          | 690.8          | 22788.6  | 690.8  | 22788.6  | 27955.8   |       |
| MT0694000 | PE PEDRA BRANCA                 | 0.0    | 0.0      | 491.1  | 16201.2  |        |          | 697.3          | 23003.1  | 697.3  | 23003.1  | 39204.3   |       |
| MT0696000 | PE BARREIRO E<br>CANINANA       | 0.0    | 0.0      | 0.0    | 0.0      |        |          | 384.9          | 29730.3  | 384.9  | 29730.3  | 29730.3   |       |
| MT0697000 | PE ATERRADO                     | 0.0    | 0.0      | 327.2  | 10795.3  |        |          | 619.4          | 20433.2  | 619.4  | 20433.2  | 31228.5   |       |
| MT0698000 | PE BURITI DO<br>ATALHO          | 0.0    | 0.0      | 7301.5 | 240712.9 |        |          | 702.3          | 22420.7  | 702.3  | 22420.7  | 263133.6  |       |
| MT0701000 | PA MESTRE                       | 0.0    | 0.0      | 720.6  | 23773.3  |        |          | 335.0          | 12919.3  | 335.0  | 12919.3  | 36692.6   |       |
| MT0702000 | PA FREI SERVACIO<br>SCHULT      | 0.0    | 0.0      | 418.7  | 13813.6  |        |          | 951.1<br>2528. | 31376.6  | 951.1  | 31376.6  | 45190.3   |       |
| MT0703000 | PA SÃO BENTO                    | 0.0    | 0.0      | 747.9  | 105710.0 |        |          | 8              | 326778.0 | 2528.8 | 326778.0 | 432488.0  |       |
| MT0704000 | PA VALE DO PRATA                | 0.0    | 0.0      | 3372.3 | 98811.8  |        |          | 801.1<br>2119. | 33954.9  | 801.1  | 33954.9  | 132766.7  | 22.0  |
| MT0705000 | PA NOSSA SENHORA<br>APARECIDA I | 6200.0 | 340777.2 | 117.5  | 4800.2   | 775.0  | 54920.1  | 4              | 109762.3 | 2894.4 | 164682.4 | 510259.8  |       |
| MT0706000 | PA SANTA LUCIA                  | 0.0    | 0.0      | 72.3   | 2384.0   |        |          | 153.5          | 5063.3   | 153.5  | 5063.3   | 7447.3    |       |
| MT0709000 | PE CAPÃO VERDE I                | 0.0    | 0.0      | 258.9  | 8541.8   |        |          | 108.6          | 3583.4   | 108.6  | 3583.4   | 12125.3   |       |
| MT0711000 | PE ÁGUA<br>VERMELHA             | 77.3   | 10619.5  | 0.0    | 0.0      | 352.9  | 48085.1  | 582.8          | 61322.1  | 935.7  | 109407.2 | 120026.8  |       |
| MT0719000 | PA FLOR DA MATA                 | 0.0    | 0.0      | 1750.9 | 46097.5  |        |          | 830.5          | 67096.3  | 830.5  | 67096.3  | 113193.8  |       |
| MT0720000 | PA SANTA<br>FILOMENA            | 401.8  | 70937.5  | 0.0    | 0.0      | 87.5   | 15723.5  | 546.6          | 84923.8  | 634.1  | 100647.3 | 171584.8  |       |

|           |                             |         |           |       |          |         |           |        |           |         |           |           |
|-----------|-----------------------------|---------|-----------|-------|----------|---------|-----------|--------|-----------|---------|-----------|-----------|
| MT0724000 | PA ALIANÇA                  | 1202.4  | 184105.9  | 0.0   | 0.0      | 1219.7  | 186861.9  | 693.9  | 106235.0  | 1913.5  | 293096.9  | 477202.7  |
| MT0725000 | PA CRISTALINO               | 580.8   | 89262.1   | 0.0   | 0.0      | 302.0   | 46281.2   | 1297.8 | 198715.7  | 1599.8  | 244996.9  | 334259.0  |
| MT0726000 | PA CRISTALINO II            | 518.7   | 79451.7   | 0.0   | 0.0      | 156.8   | 24000.2   | 555.6  | 85058.7   | 712.3   | 109058.9  | 188510.6  |
| MT0727000 | PA CRISTALINO - IV          | 0.0     | 0.0       | 472.7 | 36514.9  |         |           | 1364.6 | 105401.1  | 1364.6  | 105401.1  | 141916.0  |
| MT0728000 | PA 26 DE JANEIRO            | 4436.1  | 727253.5  | 0.0   | 0.0      | 11537.0 | 1880227.6 |        |           | 11537.0 | 1880227.6 | 2607481.1 |
| MT0731000 | PA ANTONIO SOARES           | 0.0     | 0.0       | 132.1 | 18577.3  |         |           | 1645.5 | 231483.5  | 1645.5  | 231483.5  | 250060.8  |
| MT0732000 | PA FURNAS                   | 2423.0  | 359927.2  | 0.0   | 0.0      | 2.1     | 294.6     |        |           | 2.1     | 294.6     | 360221.9  |
| MT0733000 | PA NOSSA SENHORA DE FÁTIMA  | 1124.7  | 168636.9  | 0.0   | 0.0      | 199.1   | 30346.7   |        |           | 199.1   | 30346.7   | 198983.6  |
| MT0734000 | PA PADRE JOSÉ TENCATE       | 479.8   | 67801.2   | 0.0   | 0.0      | 62.0    | 5008.4    | 1425.5 | 144331.9  | 1487.5  | 149340.3  | 217141.5  |
| MT0735000 | PA UIRAPURU                 | 957.6   | 140392.6  | 0.0   | 0.0      | 241.1   | 34126.9   |        |           | 241.1   | 34126.9   | 174519.5  |
| MT0736000 | PA LOURIVAL D-ABIC          | 3602.4  | 590994.3  | 0.0   | 0.0      | 6169.4  | 1004662.5 | 60.0   | 9778.9    | 6229.4  | 1014441.4 | 1605435.7 |
| MT0737000 | PA VIDA NOVA II             | 37105.6 | 5352609.6 | 701.9 | 101919.4 | 17934.9 | 2716064.5 | 150.1  | 7307.2    | 18085.0 | 2723371.7 | 8177900.8 |
| MT0744000 | PDS BORDOLÂNDIA             | 599.0   | 94730.3   | 0.0   | 0.0      | 197.6   | 31992.8   |        |           | 197.6   | 31992.8   | 126723.1  |
| MT0746000 | PA SANTO ANTONIO            | 718.3   | 101046.4  | 67.3  | 9173.1   | 48.4    | 6815.7    | 445.1  | 62432.6   | 493.6   | 69248.3   | 179467.8  |
| MT0750000 | PA 28 DE DEZEMBRO           | 2873.9  | 404305.6  | 2.5   | 358.0    | 403.0   | 56698.8   |        |           | 403.0   | 56698.8   | 461362.4  |
| MT0753000 | PA MÁRTIRES DOS CARAJÁS     | 0.0     | 0.0       | 322.6 | 10643.6  |         |           | 4067.7 | 156752.7  | 4067.7  | 156752.7  | 167396.3  |
| MT0754000 | PA PONTE DE BARRO           | 0.0     | 0.0       | 176.7 | 5830.2   |         |           | 4545.4 | 149953.7  | 4545.4  | 149953.7  | 155783.9  |
| MT0755000 | PA FACÃO/BOM JARDIM         | 0.0     | 0.0       | 271.0 | 8940.2   |         |           | 188.2  | 6209.3    | 188.2   | 6209.3    | 15149.5   |
| MT0756000 | PA DIOCESE DE DIAMANTINO/MT | 2604.2  | 385716.3  | 0.0   | 0.0      | 1308.0  | 182265.6  | 1302.8 | 128410.1  | 2610.8  | 310675.7  | 696392.0  |
| MT0758000 | PA MARUMBI                  | 2068.4  | 344340.7  | 0.0   | 0.0      | 944.5   | 156377.4  |        |           | 944.5   | 156377.4  | 500718.1  |
| MT0760000 | PA PINHEIRO VELHO           | 5777.2  | 857179.3  | 0.0   | 0.0      | 1044.2  | 153753.4  | 0.0    | 0.6       | 1044.2  | 153754.0  | 1010933.3 |
| MT0764000 | PA SÃO JUDAS                | 619.8   | 98646.8   | 0.0   | 0.0      | 47.2    | 7563.8    |        |           | 47.2    | 7563.8    | 106210.6  |
| MT0768000 | PA SANTO ANTONIO I          | 756.2   | 121407.2  | 0.0   | 0.0      | 6.1     | 999.0     |        |           | 6.1     | 999.0     | 122406.2  |
| MT0769000 | PA SANTO ANTONIO II         | 6552.8  | 1016185.8 | 0.0   | 0.0      | 9364.8  | 1447526.6 | 6637.7 | 1017294.6 | 16002.6 | 2464821.2 | 3481007.0 |
| MT0776000 | PA PLANALTO DO IRIRI        | 1808.6  | 338005.9  | 0.0   | 0.0      | 1096.6  | 204950.0  | 587.7  | 109830.4  | 1684.3  | 314780.4  | 652786.3  |
| MT0777000 | PA ARAUNA                   | 654.6   | 122099.4  | 0.0   | 0.0      | 496.6   | 92374.7   | 468.7  | 72670.1   | 965.3   | 165044.8  | 287144.2  |
| MT0778000 | PA ARAUNA II                | 0.0     | 0.0       | 240.3 | 8357.4   |         |           | 102.3  | 7647.3    | 102.3   | 7647.3    | 16004.7   |

|           |                                |         |           |        |          |         |           |          |          |         |           |           |       |
|-----------|--------------------------------|---------|-----------|--------|----------|---------|-----------|----------|----------|---------|-----------|-----------|-------|
| MT0781000 | PA VISTA ALEGRE                | 0.0     | 0.0       | 6241.2 | 200859.6 |         |           | 9836.8   | 310910.3 | 9836.8  | 310910.3  | 511769.9  |       |
| MT0782000 | PA ARRAIAL<br>SANTANA          | 303.8   | 46434.0   | 0.0    | 0.0      | 36.2    | 5543.9    |          |          | 36.2    | 5543.9    | 51977.9   |       |
| MT0789000 | PA BOA ESPERANÇA<br>I          | 3084.0  | 464626.1  | 0.0    | 0.0      | 679.8   | 103392.6  |          |          | 679.8   | 103392.6  | 568018.7  |       |
| MT0793000 | PA CANÃA I<br>PA SÃO           | 2211.3  | 317989.5  | 0.0    | 0.0      | 1914.1  | 274602.9  | 4076.8   | 146552.5 | 5990.9  | 421155.4  | 739144.9  |       |
| MT0794000 | PEDRO/CAMBARA                  | 3071.4  | 446095.2  | 51.1   | 7109.3   | 1426.9  | 199443.1  | 344.0    | 33263.5  | 1770.9  | 232706.5  | 685911.0  |       |
| MT0798000 | PA EMA                         | 7120.0  | 904639.9  | 613.6  | 74304.2  | 3718.4  | 432397.5  |          |          | 3718.4  | 432397.5  | 1411341.7 |       |
| MT0799000 | PA PORTO VELHO<br>PA ZUMBI DOS | 3723.4  | 568112.7  | 0.0    | 0.0      | 2789.5  | 426980.2  |          |          | 2789.5  | 426980.2  | 995093.0  |       |
| MT0807000 | PALMARES II<br>PDS SONHO DE    | 438.6   | 68059.6   | 0.0    | 0.0      | 2011.0  | 324935.0  |          |          | 2011.0  | 324935.0  | 392994.6  |       |
| MT0808000 | ANDERSON<br>PA MARIA           | 0.0     | 0.0       | 3143.7 | 103709.6 |         |           | 2902.0   | 95738.4  | 2902.0  | 95738.4   | 199448.0  |       |
| MT0809000 | BENVINDA DE<br>AVILA SOARES    | 0.0     | 0.0       | 7153.9 | 257226.9 | 7.9     | 523.7     | 3279.3   | 334714.4 | 3287.2  | 335238.0  | 592465.0  |       |
| MT0810000 | PA DOM OZORIO<br>STOFELL       | 5636.3  | 699634.8  | 2360.7 | 158309.7 | 939.2   | 91299.8   | 1252.4   | 79300.5  | 2191.5  | 170600.3  | 1028544.8 | 178.4 |
| MT0812000 | PA SERRA VERDE                 | 0.0     | 0.0       | 611.6  | 20063.2  |         |           | 2031.4   | 51833.3  | 2031.4  | 51833.3   | 71896.5   |       |
| MT0814000 | PA MONTE AZUL<br>PA BRIDÃO     | 0.0     | 0.0       | 1033.1 | 65700.5  |         |           | 2968.2   | 413590.1 | 2968.2  | 413590.1  | 479290.6  |       |
| MT0815000 | BRASILEIRO                     | 13785.2 | 1306596.8 | 0.0    | 0.0      | 4929.5  | 442220.5  | 45.3     | 4231.0   | 4974.7  | 446451.6  | 1753048.4 |       |
| MT0816000 | PA MIURA                       | 1594.6  | 178891.2  | 0.0    | 0.0      | 1010.7  | 144652.6  |          |          | 1010.7  | 144652.6  | 323543.8  |       |
| MT0817000 | PA BARRA DO<br>MARCO           | 503.7   | 75690.1   | 0.0    | 0.0      | 272.5   | 41701.6   |          |          | 272.5   | 41701.6   | 117391.7  |       |
| MT0818000 | PA MEDALHA<br>MILAGROSA        | 17955.9 | 3116414.0 | 0.0    | 0.0      | 9884.7  | 1744951.6 | 208.0    | 38871.4  | 10092.7 | 1783823.1 | 4900237.1 |       |
| MT0819000 | PDS NOVO<br>RENASCER           | 1381.4  | 49001.4   | 6514.6 | 234330.6 | 2153.1  | 105657.8  | 2041.7.4 | 658709.6 | 22570.5 | 764367.4  | 1047699.4 |       |
| MT0820000 | PDS TERRA DE<br>VIVER          | 765.1   | 116630.7  | 0.0    | 0.0      | 185.1   | 28314.9   |          |          | 185.1   | 28314.9   | 144945.6  |       |
| MT0821000 |                                | 353.0   | 54043.4   | 0.0    | 0.0      | 862.4   | 132028.5  |          |          | 862.4   | 132028.5  | 186071.9  |       |
| MT0822000 | PDS FREI CRISPIN               | 325.6   | 49845.1   | 0.0    | 0.0      | 1337.7  | 204744.6  |          |          | 1337.7  | 204744.6  | 254589.7  |       |
| MT0824000 | PDS OLGA BENARIO               | 443.2   | 67652.8   | 0.0    | 0.0      | 1014.1  | 155258.3  |          |          | 1014.1  | 155258.3  | 222911.1  |       |
| MT0827000 | PA JAPURANOMANN                | 14284.6 | 2650622.6 | 0.0    | 0.0      | 14439.2 | 2697403.6 |          |          | 14439.2 | 2697403.6 | 5348026.2 |       |
| MT0835000 | PA RECOMPENSA II               | 0.0     | 0.0       | 0.0    | 0.0      |         |           | 1199.0   | 39554.8  | 1199.0  | 39554.8   | 39554.8   |       |
| MT0837000 | PDS SÃO PAULO                  | 963.1   | 161364.7  | 0.0    | 0.0      | 1392.8  | 227098.8  |          |          | 1392.8  | 227098.8  | 388463.5  |       |
| MT0838000 | PDS NOVA ALIANÇA               | 1331.2  | 203748.3  | 0.0    | 0.0      | 1100.3  | 168460.5  |          |          | 1100.3  | 168460.5  | 372208.7  |       |

|           |                                             |           |             |              |            |              |                 |              |                |         |           |               |             |             |        |
|-----------|---------------------------------------------|-----------|-------------|--------------|------------|--------------|-----------------|--------------|----------------|---------|-----------|---------------|-------------|-------------|--------|
| MT0840000 | PDS NOVA<br>CONQUISTA                       | 1335.4    | 198843.0    | 0.0          | 0.0        | 1091.7       | 159917.4        |              |                | 1091.7  | 159917.4  | 358760.3      |             |             |        |
| MT0841000 | PDS KENO                                    | 10036.3   | 1522800.5   | 0.0          | 0.0        | 12342.5      | 1889256.9       |              |                | 12342.5 | 1889256.9 | 3412057.4     |             |             |        |
| MT0845000 | PA SANTA RITA                               | 3.8       | 64.5        | 515.3        | 23785.0    | 426.8        | 12823.7         | 2381<br>2.0  | 1150249.9      | 24238.8 | 1163073.6 | 1186923.1     |             |             |        |
| MT0853000 | PA GUATAPARA                                | 0.0       | 0.0         | 2775.6       | 98206.4    |              |                 | 4115.<br>5   | 184641.1       | 4115.5  | 184641.1  | 282847.5      |             |             |        |
| MT0854000 | PA PAU DALHO<br>PA BARRA DO<br>MARCO II     | 0.0       | 0.0         | 0.0          | 0.0        | 682.5        | 93598.2         | 366.8        | 13783.6        | 1049.3  | 107381.8  | 107381.8      | 73.9        |             |        |
| MT0855000 |                                             | 60.1      | 9001.6      | 0.0          | 0.0        |              |                 |              |                | 0.0     | 0.0       | 9001.6        |             |             |        |
| MT0856000 | PDS 12 DE OUTUBRO<br>PA SILVIO              | 2678.0    | 404671.5    | 0.0          | 0.0        | 3654.5       | 558834.9        |              |                | 3654.5  | 558834.9  | 963506.4      |             |             |        |
| MT0857000 | RODRIGUES                                   | 2859.0    | 357306.9    | 0.0          | 0.0        | 297.6        | 31919.7         | 1137.<br>9   | 67129.9        | 1435.5  | 99049.5   | 456356.5      |             |             |        |
|           | Total in Mato Grosso                        | 2325215.5 | 334118845.9 | 466772.<br>6 | 22994767.4 | 716765.<br>2 | 104271180.<br>4 | 8131<br>00.5 | 45515010.<br>9 | 577.7   | 83813.8   | 1530443.<br>5 | 149870005.1 | 506983618.4 | 8581.0 |
|           | <b>PARÁ</b>                                 |           | 0.0         | 0.0          | 0.0        |              |                 |              |                | 0.0     | 0.0       | 0.0           |             |             |        |
| MB0001000 | PA RIBEIRÃO DE<br>FOGO                      | 8216.2    | 1321811.7   | 0.0          | 0.0        | 187.3        | 30012.2         |              |                | 187.3   | 30012.2   | 1351824.0     |             |             |        |
| MB0002000 | PA CASTANHAL<br>ARARAS                      | 3803.7    | 706693.9    | 0.0          | 0.0        | 1180.0       | 220072.7        |              |                | 1180.0  | 220072.7  | 926766.6      | 6.6         |             |        |
| MB0003000 | PA COLONIA VERDE<br>BRASILEIRA              | 28411.8   | 4722399.4   | 0.0          | 0.0        | 2468.1       | 403129.9        |              |                | 2468.1  | 403129.9  | 5125529.3     | 2.9         |             |        |
| MB0004000 | PA TUERE<br>PA JONCON/3                     | 53799.0   | 10044700.4  | 0.0          | 0.0        | 48090.6      | 8986435.5       |              |                | 778.2   | 145440.2  | 48868.8       | 19176576.1  |             |        |
| MB0005000 | IRMÃOS                                      | 15916.6   | 2670321.2   | 0.0          | 0.0        | 1318.6       | 218517.6        | 4698.<br>8   | 788281.3       | 6017.4  | 1006798.9 | 3677120.1     | 85.7        |             |        |
| MB0006000 | PA JACUNDA                                  | 9457.7    | 1752014.7   | 0.0          | 0.0        | 1791.5       | 332298.9        |              |                | 1791.5  | 332298.9  | 2084313.6     | 1256.0      |             |        |
| MB0007000 | PA INGÁ<br>PA RIO DA<br>ESQUERDA            | 2881.0    | 475239.4    | 0.0          | 0.0        | 2923.1       | 487325.6        | 3.6          | 624.8          | 2926.7  | 487950.4  | 963189.7      |             |             |        |
| MB0008000 |                                             | 28644.3   | 5329527.8   | 0.0          | 0.0        | 11208.3      | 2091692.7       |              |                | 11208.3 | 2091692.7 | 7421220.5     |             |             |        |
| MB0009000 | PA INDEPENDENCIA                            | 1756.2    | 321148.2    | 0.0          | 0.0        | 47.9         | 8799.4          |              |                | 47.9    | 8799.4    | 329947.7      |             |             |        |
| MB0010000 | PA ARRAIAPORÃ                               | 3322.3    | 535364.5    | 0.0          | 0.0        | 543.5        | 88536.4         |              |                | 543.5   | 88536.4   | 623900.9      |             |             |        |
| MB0011000 | PA CARAJAS II E III<br>PA<br>GELADINHO/MURU | 64059.7   | 11622847.7  | 0.0          | 0.0        | 13315.3      | 2200737.2       | 2123.<br>6   | 152626.3       | 15438.9 | 2353363.4 | 13976211.1    |             |             |        |
| MB0012000 | MURU                                        | 33042.3   | 6120588.6   | 0.0          | 0.0        | 2751.1       | 512122.1        |              |                | 4.9     | 922.6     | 2756.0        | 513044.7    | 6633633.3   |        |
| MB0013000 | PA SERENO                                   | 17871.9   | 3306379.9   | 0.0          | 0.0        | 1958.9       | 365114.8        |              |                | 1958.9  | 365114.8  | 3671494.7     |             |             |        |
| MB0014000 | PA CINZEIRO                                 | 4820.1    | 894193.0    | 0.0          | 0.0        | 1056.1       | 196741.5        |              |                | 1056.1  | 196741.5  | 1090934.5     | 120.4       |             |        |
| MB0015000 | PA<br>CARAJAS/TAMBORIL                      | 12971.3   | 2406366.0   | 0.0          | 0.0        | 1945.4       | 362266.3        |              |                | 1945.4  | 362266.3  | 2768632.3     | 112.3       |             |        |
| MB0016000 | PA SÃO JORGE                                | 3529.4    | 653555.5    | 0.0          | 0.0        | 313.7        | 52948.0         | 212.9        | 39782.8        | 526.6   | 92730.8   | 746286.3      |             |             |        |
| MB0017000 | PA MENINA MOÇA                              | 2105.5    | 350719.7    | 0.0          | 0.0        | 159.9        | 26105.2         |              |                | 159.9   | 26105.2   | 376824.9      |             |             |        |

|           |                             |          |            |     |     |         |           |        |          |         |           |            |      |
|-----------|-----------------------------|----------|------------|-----|-----|---------|-----------|--------|----------|---------|-----------|------------|------|
| MB0018000 | PA ITAIPAVAS/LOTE-143       | 4026.7   | 743425.8   | 0.0 | 0.0 | 145.4   | 24519.6   |        |          | 145.4   | 24519.6   | 767945.4   |      |
| MB0019000 | PA LAGOA BONITA             | 18124.2  | 3354667.9  | 0.0 | 0.0 | 432.9   | 80210.9   |        |          | 432.9   | 80210.9   | 3434878.7  |      |
| MB0020000 | PA ABÓBORA                  | 12972.2  | 2400626.4  | 0.0 | 0.0 | 190.8   | 35303.2   |        |          | 190.8   | 35303.2   | 2435929.6  |      |
| MB0021000 | PA PAULO FONTELES           | 15095.5  | 2795215.7  | 0.0 | 0.0 | 1447.3  | 268162.0  |        |          | 1447.3  | 268162.0  | 3063377.7  |      |
| MB0022000 | PA GROTIÃO DOS CABOCLÓS     | 39117.3  | 6941033.1  | 0.0 | 0.0 | 1871.8  | 317111.5  |        |          | 1871.8  | 317111.5  | 7258144.6  |      |
| MB0023000 | PA BOCA DO CARDOSO          | 16546.1  | 3077879.8  | 0.0 | 0.0 | 487.7   | 91074.0   |        |          | 487.7   | 91074.0   | 3168953.7  |      |
| MB0024000 | PA VENEZA                   | 9290.0   | 1719316.7  | 0.0 | 0.0 | 929.8   | 172197.6  |        |          | 929.8   | 172197.6  | 1891514.4  |      |
| MB0025000 | PA TUCUMA                   | 364613.7 | 67386372.6 | 0.0 | 0.0 | 38706.0 | 7082518.0 |        |          | 38706.0 | 7082518.0 | 74468890.6 | 11.7 |
| MB0026000 | PA JUSSAMA                  | 5057.6   | 824236.7   | 0.0 | 0.0 | 578.2   | 94225.2   | 609.9  | 99396.0  | 1188.1  | 193621.2  | 1017857.9  |      |
| MB0027000 | PA BELA VISTA               | 14744.7  | 2346663.4  | 0.0 | 0.0 | 1666.1  | 268102.5  |        |          | 1666.1  | 268102.5  | 2614765.9  | 10.9 |
| MB0028000 | PA ARRAIAS                  | 2378.1   | 393972.6   | 0.0 | 0.0 | 297.4   | 49823.2   | 2296.2 | 385497.3 | 2593.6  | 435320.5  | 829293.1   |      |
| MB0029000 | PA CINTURAO VERDE I E II    | 69762.8  | 12994058.7 | 0.0 | 0.0 | 19712.3 | 3680661.1 |        |          | 19712.3 | 3680661.1 | 16674719.8 | 23.3 |
| MB0030000 | PA VERMELHO E PRETO         | 4251.1   | 786714.9   | 0.0 | 0.0 | 41.4    | 7666.1    |        |          | 41.4    | 7666.1    | 794381.0   |      |
| MB0031000 | PA CENTRO DA MATA           | 3977.5   | 664042.0   | 0.0 | 0.0 | 386.4   | 63665.1   |        |          | 386.4   | 63665.1   | 727707.1   |      |
| MB0032000 | PA ITAIPAVAS/LOTE 142       | 8324.9   | 1540604.9  | 0.0 | 0.0 | 50.4    | 9328.7    |        |          | 50.4    | 9328.7    | 1549933.7  |      |
| MB0033000 | PA JOÃO CANUTO              | 2204.3   | 366080.3   | 0.0 | 0.0 | 2007.0  | 327291.6  |        |          | 2007.0  | 327291.6  | 693372.0   |      |
| MB0034000 | PA MARAJOARA                | 4259.4   | 788244.0   | 0.0 | 0.0 | 116.7   | 21592.6   |        |          | 116.7   | 21592.6   | 809836.6   |      |
| MB0035000 | PA PALMEIRAS                | 20145.0  | 3751467.9  | 0.0 | 0.0 | 7420.7  | 1385854.9 |        |          | 7420.7  | 1385854.9 | 5137322.8  |      |
| MB0036000 | PA PROPASA/DOIS IRMÃOS      | 22027.4  | 3664791.1  | 0.0 | 0.0 | 1427.2  | 232753.0  | 2598.6 | 426473.8 | 4025.8  | 659226.7  | 4324017.9  |      |
| MB0037000 | PA RIO GELADO               | 7242.8   | 1353598.4  | 0.0 | 0.0 | 5184.9  | 969012.8  |        |          | 5184.9  | 969012.8  | 2322611.2  |      |
| MB0038000 | PA SÃO JOSÉ DOS TRÊS MORROS | 1757.4   | 292101.0   | 0.0 | 0.0 | 649.8   | 120894.6  |        |          | 649.8   | 120894.6  | 412995.6   |      |
| MB0039000 | PA SAGITARIO                | 1885.6   | 350306.7   | 0.0 | 0.0 | 544.6   | 101675.9  |        |          | 544.6   | 101675.9  | 451982.6   |      |
| MB0040000 | PA AGUA FRIA                | 7441.1   | 1347706.4  | 0.0 | 0.0 | 459.3   | 80262.7   |        |          | 459.3   | 80262.7   | 1427969.1  |      |
| MB0041000 | PA CACHOEIRA PRETA          | 2899.9   | 539087.4   | 0.0 | 0.0 | 471.4   | 88026.2   |        |          | 471.4   | 88026.2   | 627113.6   |      |
| MB0042000 | PA IPIRANGA                 | 3615.4   | 669070.7   | 0.0 | 0.0 | 19.5    | 3606.4    |        |          | 19.5    | 3606.4    | 672677.0   |      |
| MB0043000 | PA JUSSARA                  | 2909.2   | 538372.3   | 0.0 | 0.0 |         |           |        |          | 0.0     | 0.0       | 538372.3   |      |
| MB0044000 | PA GAMELEIRA                | 37825.1  | 7030640.0  | 0.0 | 0.0 | 2241.6  | 418081.7  |        |          | 2241.6  | 418081.7  | 7448721.7  |      |

|           |                             |         |           |     |     |         |           |        |          |         |           |            |         |          |
|-----------|-----------------------------|---------|-----------|-----|-----|---------|-----------|--------|----------|---------|-----------|------------|---------|----------|
| MB0045000 | PA VALE FORMOSO             | 3347.2  | 619426.7  | 0.0 | 0.0 | 5.6     | 1027.7    |        |          | 5.6     | 1027.7    | 620454.4   |         |          |
| MB0046000 | PA RIO BRANCO               | 7783.1  | 1454509.1 | 0.0 | 0.0 | 4176.5  | 780541.4  |        |          | 4176.5  | 780541.4  | 2235050.5  |         |          |
| MB0047000 | PA INGÁ II                  | 7717.5  | 1195610.1 | 0.0 | 0.0 | 598.2   | 100095.8  | 65.6   | 4085.5   | 663.8   | 104181.3  | 1299791.3  |         |          |
| MB0048000 | PA INGÁ III                 | 875.3   | 90752.7   | 0.0 | 0.0 | 222.3   | 25706.6   | 9053.8 | 394210.0 | 9276.2  | 419916.6  | 510669.3   |         |          |
| MB0049000 | PA JACARE                   | 2936.0  | 544668.6  | 0.0 | 0.0 | 142.8   | 26658.6   |        |          | 0.5     | 90.8      | 143.3      | 26749.4 | 571418.0 |
| MB0050000 | PA RIO VERMELHO             | 5254.8  | 982001.5  | 0.0 | 0.0 | 945.5   | 176712.1  |        |          | 945.5   | 176712.1  | 1158713.5  |         |          |
| MB0051000 | PA ELDORADO                 | 7768.5  | 1451315.9 | 0.0 | 0.0 | 1072.6  | 200458.5  |        |          | 1072.6  | 200458.5  | 1651774.5  |         |          |
| MB0052000 | PA CASTANHEIRA              | 4790.7  | 895339.4  | 0.0 | 0.0 | 1041.3  | 194607.2  |        |          | 1041.3  | 194607.2  | 1089946.6  |         |          |
| MB0053000 | PA TANCREDO NEVES           | 18294.5 | 3410927.9 | 0.0 | 0.0 | 3597.7  | 672169.4  |        |          | 3597.7  | 672169.4  | 4083097.3  |         |          |
| MB0054000 | PA COLONIA S. JOSE DO XINGU | 41959.5 | 7819859.2 | 0.0 | 0.0 | 15434.7 | 2883781.2 | 184.0  | 34390.7  | 15618.7 | 2918171.9 | 10738031.1 |         |          |
| MB0055000 | PA APERTAR DA HORA          | 3802.6  | 632778.2  | 0.0 | 0.0 | 574.1   | 94106.6   | 0.5    | 78.0     | 574.6   | 94184.5   | 726962.7   |         |          |
| MB0056000 | PA ITACAIUNAS-AÇU           | 3066.6  | 573049.2  | 0.0 | 0.0 | 1294.2  | 241835.8  |        |          | 1294.2  | 241835.8  | 814885.1   |         |          |
| MB0057000 | PA CEDRINHO                 | 2429.4  | 450138.4  | 0.0 | 0.0 | 316.8   | 59012.9   |        |          | 316.8   | 59012.9   | 509151.3   |         |          |
| MB0058000 | PA FORTALEZA I E II         | 6099.6  | 1129342.6 | 0.0 | 0.0 | 265.9   | 49419.4   |        |          | 265.9   | 49419.4   | 1178762.0  |         |          |
| MB0059000 | PA JOVENCRELANDIA I E II    | 4603.3  | 855995.6  | 0.0 | 0.0 | 2663.5  | 497091.2  |        |          | 2663.5  | 497091.2  | 1353086.8  |         |          |
| MB0060000 | PA ALDEIA I E II            | 9635.1  | 1613917.5 | 0.0 | 0.0 | 55.0    | 9052.5    |        |          | 55.0    | 9052.5    | 1622970.0  |         |          |
| MB0061000 | PA LONTRA                   | 4436.8  | 732502.6  | 0.0 | 0.0 | 314.5   | 52801.0   |        |          | 314.5   | 52801.0   | 785303.5   |         |          |
| MB0062000 | PA PECOSA                   | 7622.3  | 1167425.7 | 0.0 | 0.0 | 471.7   | 77044.0   |        |          | 471.7   | 77044.0   | 1244469.7  | 12.5    |          |
| MB0063000 | PA ARAGUAXIM II             | 23481.6 | 2727816.0 | 0.0 | 0.0 | 12842.7 | 1096665.4 | 4468.6 | 347129.5 | 17311.3 | 1443794.8 | 4171610.8  |         |          |
| MB0064000 | PA SÃO DOMINGOS             | 2713.9  | 452187.6  | 0.0 | 0.0 | 146.1   | 23889.3   |        |          | 146.1   | 23889.3   | 476076.8   |         |          |
| MB0065000 | PA TUPÁ-CIRETÁ - LOTE 160   | 4347.6  | 804569.2  | 0.0 | 0.0 | 28.3    | 5241.4    |        |          | 28.3    | 5241.4    | 809810.6   |         |          |
| MB0066000 | PA PARAUPEBAS I             | 2886.1  | 531845.2  | 0.0 | 0.0 | 54.7    | 9445.0    |        |          | 54.7    | 9445.0    | 541290.2   |         |          |
| MB0067000 | PA PALMARES                 | 3723.3  | 692530.7  | 0.0 | 0.0 | 1456.8  | 272131.4  |        |          | 1456.8  | 272131.4  | 964662.0   |         |          |
| MB0068000 | PA ESTRELA DO PARÁ          | 1967.5  | 364824.1  | 0.0 | 0.0 | 91.3    | 16928.6   | 88.3   | 16503.4  | 179.7   | 33431.9   | 398256.0   |         |          |
| MB0069000 | PA JACIRA II                | 1881.9  | 317932.7  | 0.0 | 0.0 | 41.1    | 7419.4    |        |          | 41.1    | 7419.4    | 325352.1   |         |          |
| MB0070000 | PA SANTO ANTONIO            | 3604.0  | 599004.0  | 0.0 | 0.0 | 424.7   | 69366.4   |        |          | 424.7   | 69366.4   | 668370.4   |         |          |
| MB0071000 | PA ITAIPAVAS II - LOTE 134  | 4306.2  | 742591.9  | 0.0 | 0.0 | 40.8    | 7046.4    |        |          | 40.8    | 7046.4    | 749638.3   |         |          |



|           |                               |         |           |     |     |         |           |            |          |          |          |           |           |           |
|-----------|-------------------------------|---------|-----------|-----|-----|---------|-----------|------------|----------|----------|----------|-----------|-----------|-----------|
| MB0072000 | PA ITAIPAVAS III-<br>LOTE 147 | 4205.4  | 778242.8  | 0.0 | 0.0 |         |           |            |          | 0.0      | 0.0      | 778242.8  |           |           |
| MB0073000 | PA ITACAIUNAS                 | 4102.1  | 764558.5  | 0.0 | 0.0 | 1444.9  | 269924.2  |            |          | 1444.9   | 269924.2 | 1034482.7 | 6.3       |           |
| MB0074000 | PA SANTA CRISTINA             | 8260.8  | 1363250.7 | 0.0 | 0.0 | 738.5   | 120583.5  |            |          | 738.5    | 120583.5 | 1483834.2 |           |           |
| MB0075000 | PA MATA AZUL I                | 3654.6  | 597750.2  | 0.0 | 0.0 | 699.6   | 114073.4  |            |          | 699.6    | 114073.4 | 711823.6  |           |           |
| MB0076000 | PA ANGELIN                    | 9405.3  | 1752838.3 | 0.0 | 0.0 | 5028.1  | 939536.9  |            | 826.7    | 154473.7 | 5854.8   | 1094010.6 | 2846848.9 |           |
| MB0077000 | PA CURRAL DE<br>PEDRAS        | 5624.8  | 915100.9  | 0.0 | 0.0 | 320.7   | 53727.6   |            |          | 320.7    | 53727.6  | 968828.4  | 34.6      |           |
| MB0078000 | PA CANARANA                   | 12707.9 | 2132002.2 | 0.0 | 0.0 | 829.5   | 138269.7  | 183.9      | 30877.5  |          | 1013.4   | 169147.2  | 2301149.4 | 2.3       |
| MB0079000 | PA REDENÇÃO                   | 2326.7  | 432167.2  | 0.0 | 0.0 | 458.8   | 85531.3   |            | 209.4    | 39061.1  | 668.2    | 124592.5  | 556759.7  |           |
| MB0080000 | PA AGRISA                     | 8886.0  | 1354398.4 | 0.0 | 0.0 | 610.9   | 93107.6   |            |          | 610.9    | 93107.6  | 1447506.1 | 108.6     |           |
| MB0081000 | PA PARAUAPEBAS II             | 2912.3  | 538615.1  | 0.0 | 0.0 | 20.8    | 3841.8    |            |          | 20.8     | 3841.8   | 542456.9  |           |           |
| MB0082000 | PA MARIA LUIZA                | 4335.5  | 651981.9  | 0.0 | 0.0 | 140.3   | 20996.2   |            |          | 140.3    | 20996.2  | 672978.1  | 6.4       |           |
| MB0083000 | PA MATA VERDE                 | 4281.2  | 696834.4  | 0.0 | 0.0 | 659.0   | 107282.3  |            |          | 659.0    | 107282.3 | 804116.8  |           |           |
| MB0084000 | PA SÃO SEBASTIÃO -<br>LOTE 86 | 1960.5  | 320239.1  | 0.0 | 0.0 | 741.8   | 120924.4  | 89.7       | 14626.4  |          | 831.5    | 135550.8  | 455789.9  |           |
| MB0085000 | PA 17 DE ABRIL                | 17077.5 | 2951681.9 | 0.0 | 0.0 | 250.4   | 41444.2   |            |          | 250.4    | 41444.2  | 2993126.1 |           |           |
| MB0086000 | PA NOVO ARAGUAIA<br>- LOTE 03 | 8162.0  | 1366844.1 | 0.0 | 0.0 | 1317.0  | 216518.1  | 562.2      | 94264.0  |          | 1879.2   | 310782.0  | 1677626.1 | 21.9      |
| MB0088000 | PA SUDOESTE                   | 26337.0 | 4916463.4 | 0.0 | 0.0 | 11712.6 | 2188773.5 |            |          | 18.1     | 3376.4   | 11730.7   | 2192150.0 | 7108613.4 |
| MB0089000 | PA GROTÃO                     | 4680.4  | 779017.4  | 0.0 | 0.0 | 9.7     | 1574.7    |            |          |          | 9.7      | 1574.7    | 780592.0  |           |
| MB0090000 | PA AGROPECUS                  | 35978.0 | 5560495.8 | 0.0 | 0.0 | 5885.7  | 941948.6  | 1262.<br>1 | 34670.9  |          | 7147.8   | 976619.5  | 6537115.3 |           |
| MB0091000 | PA EMBAUBAL                   | 2070.7  | 352284.6  | 0.0 | 0.0 | 187.2   | 30608.8   |            |          |          | 187.2    | 30608.8   | 382893.4  | 55.6      |
| MB0092000 | PA SÃO FRANCISCO              | 6865.1  | 1278125.1 | 0.0 | 0.0 | 729.5   | 136291.4  |            |          |          | 729.5    | 136291.4  | 1414416.5 |           |
| MB0093000 | PA CAMPOS ALTOS               | 8299.4  | 1475566.1 | 0.0 | 0.0 | 607.5   | 100274.1  |            |          |          | 607.5    | 100274.1  | 1575840.2 |           |
| MB0094000 | PA UBA                        | 4164.2  | 770634.0  | 0.0 | 0.0 | 55.3    | 10236.8   |            |          |          | 55.3     | 10236.8   | 780870.8  |           |
| MB0095000 | PA SANTA MARIA<br>DO PONTAL   | 5099.8  | 948854.0  | 0.0 | 0.0 | 291.1   | 54398.6   |            |          |          | 291.1    | 54398.6   | 1003252.6 |           |
| MB0096000 | PA SUÇUAPARA                  | 7663.9  | 1255007.8 | 0.0 | 0.0 | 839.3   | 136782.8  | 193.3      | 31506.0  |          | 1032.6   | 168288.8  | 1423296.5 |           |
| MB0097000 | PA RECANTÃO                   | 2772.4  | 509107.1  | 0.0 | 0.0 | 173.2   | 31458.4   |            |          |          | 173.2    | 31458.4   | 540565.5  |           |
| MB0098000 | PA TOCANTINS                  | 643.3   | 118955.7  | 0.0 | 0.0 |         |           | 1463.<br>0 | 263116.6 |          | 1463.0   | 263116.6  | 382072.3  |           |
| MB0099000 | PA MONTES BELOS               | 6041.4  | 1120326.9 | 0.0 | 0.0 | 3723.4  | 689699.4  |            |          | 184.6    | 34302.5  | 3908.0    | 724001.9  | 1844328.8 |
| MB0100000 | PA NAZARÉ                     | 11465.1 | 1850156.4 | 0.0 | 0.0 | 807.8   | 131917.5  |            |          |          | 807.8    | 131917.5  | 1982073.9 |           |

|           |                                      |         |            |     |     |         |           |             |      |         |          |           |           |            |       |
|-----------|--------------------------------------|---------|------------|-----|-----|---------|-----------|-------------|------|---------|----------|-----------|-----------|------------|-------|
| MB0101000 | PA JEQUIÉ                            | 1433.5  | 264884.9   | 0.0 | 0.0 | 1031.9  | 168216.5  |             |      | 1031.9  | 168216.5 | 433101.4  |           |            |       |
| MB0102000 | PA DIACUI                            | 2917.4  | 543044.2   | 0.0 | 0.0 | 34.9    | 6514.7    |             | 55.7 | 10406.2 | 90.6     | 16920.9   | 559965.1  |            |       |
| MB0103000 | PA INAJÁ                             | 5534.6  | 792326.3   | 0.0 | 0.0 | 123.8   | 13706.3   | 816.2       |      |         | 940.0    | 34975.3   | 827301.5  |            |       |
| MB0104000 | PA BURITIRANA                        | 36520.9 | 6807614.0  | 0.0 | 0.0 | 7199.1  | 1345105.2 |             |      |         | 7199.1   | 1345105.2 | 8152719.2 |            |       |
| MB0105000 | PAE PRAIALTA<br>PIRANHEIRA           | 16664.0 | 3111198.8  | 0.0 | 0.0 | 5956.9  | 1113093.0 |             | 2.1  | 389.4   | 5959.0   | 1113482.4 | 4224681.2 | 957.3      |       |
| MB0106000 | PA GAÚCHA<br>PA PEDRO<br>MONTEIRO DA | 4515.0  | 720436.8   | 0.0 | 0.0 | 228.8   | 36764.1   |             |      |         | 228.8    | 36764.1   | 757201.0  |            |       |
| MB0107000 | SILVA<br>PA ESCALADA DO              | 1157.5  | 214209.8   | 0.0 | 0.0 | 5.0     | 922.3     |             |      |         | 5.0      | 922.3     | 215132.1  |            |       |
| MB0108000 | NORTE                                | 1884.0  | 311075.5   | 0.0 | 0.0 | 1078.1  | 175832.7  |             |      |         | 1078.1   | 175832.7  | 486908.2  |            |       |
| MB0109000 | PA MANAH                             | 4457.0  | 689229.0   | 0.0 | 0.0 | 1816.0  | 292500.1  | 1972.<br>0  |      |         | 3788.0   | 354050.5  | 1043279.5 |            |       |
| MB0110000 | PA BARRA MANSÁ                       | 5747.7  | 961313.6   | 0.0 | 0.0 | 386.6   | 63893.4   |             |      |         | 386.6    | 63893.4   | 1025206.9 |            |       |
| MB0111000 | PA RIO PRETO<br>PA ESCALADA DO       | 27218.7 | 4462898.6  | 0.0 | 0.0 | 8442.4  | 1376834.6 | 332.9       |      |         | 54665.4  | 8775.3    | 1431500.0 | 5894398.6  |       |
| MB0112000 | NORTE II LOTE 28<br>PA PRIMAVERA E   | 10244.7 | 1715691.5  | 0.0 | 0.0 | 1695.6  | 277945.5  |             |      |         | 1695.6   | 277945.5  | 1993637.0 | 0.0        |       |
| MB0113000 | OUTROS                               | 3610.7  | 602249.9   | 0.0 | 0.0 | 420.8   | 68911.4   | 333.0       |      |         | 55902.3  | 753.8     | 124813.7  | 727063.6   |       |
| MB0114000 | PA ARRAIAPORÁ II<br>PA RAIMUNDO      | 4991.0  | 836588.5   | 0.0 | 0.0 | 35.3    | 5765.2    |             |      |         | 35.3     | 5765.2    | 842353.7  |            |       |
| MB0115000 | CORREIA - LOTE 81<br>PA MAGDALENA    | 4669.3  | 766654.1   | 0.0 | 0.0 | 653.4   | 103209.1  |             |      |         | 653.4    | 103209.1  | 869863.1  | 6.0        |       |
| MB0116000 | NICOLINA RIVETTI                     | 8281.8  | 1392821.5  | 0.0 | 0.0 | 820.5   | 137651.6  |             |      |         | 820.5    | 137651.6  | 1530473.1 |            |       |
| MB0117000 | PA TRÊS RIOS                         | 2275.5  | 328256.0   | 0.0 | 0.0 | 147.6   | 23850.8   | 2769.<br>7  |      |         | 83471.7  | 2917.2    | 107322.4  | 435578.5   |       |
| MB0118000 | PA MILHOMEM<br>PA PE JOSIMO          | 1335.5  | 219562.1   | 0.0 | 0.0 | 179.8   | 28277.6   |             |      |         | 179.8    | 28277.6   | 247839.6  | 10.8       |       |
| MB0119000 | TAVARES                              | 26141.8 | 4284190.0  | 0.0 | 0.0 | 20488.6 | 3074445.3 | 1043<br>9.1 |      |         | 878966.2 | 30927.7   | 3953411.5 | 8237601.5  | 547.6 |
| MB0120000 | PA POÇO RICO                         | 6926.5  | 1281816.4  | 0.0 | 0.0 | 35.6    | 6595.2    |             |      |         | 35.6     | 6595.2    | 1288411.6 |            |       |
| MB0121000 | PA OZIEL PEREIRA                     | 19272.4 | 3244396.3  | 0.0 | 0.0 | 265.8   | 43407.5   |             |      |         | 265.8    | 43407.5   | 3287803.9 |            |       |
| MB0122000 | PA PROGRESSO                         | 15781.4 | 2674602.5  | 0.0 | 0.0 | 947.0   | 154494.3  |             |      |         | 947.0    | 154494.3  | 2829096.8 |            |       |
| MB0123000 | PA BENFICA                           | 7945.2  | 1477715.0  | 0.0 | 0.0 | 1529.0  | 285283.2  |             |      |         | 1529.0   | 285283.2  | 1762998.2 |            |       |
| MB0124000 | PA LUCIANA                           | 74353.2 | 13431235.5 | 0.0 | 0.0 | 24428.1 | 4303195.8 | 302.5       |      |         | 52068.2  | 24730.5   | 4355264.0 | 17786499.5 |       |
| MB0125000 | PA LIMÃO                             | 6916.6  | 1271294.9  | 0.0 | 0.0 | 362.2   | 63338.2   |             |      |         | 362.2    | 63338.2   | 1334633.1 |            |       |
| MB0127000 | PA AÇAIZAL                           | 2720.4  | 443345.0   | 0.0 | 0.0 | 579.2   | 94394.6   |             |      |         | 579.2    | 94394.6   | 537739.6  | 46.4       |       |
| MB0128000 | PA PATAUÁ                            | 6523.5  | 1216069.7  | 0.0 | 0.0 | 371.2   | 69362.1   |             |      |         | 371.2    | 69362.1   | 1285431.8 |            |       |

|           |                                |         |           |     |     |        |           |        |         |         |           |           |           |
|-----------|--------------------------------|---------|-----------|-----|-----|--------|-----------|--------|---------|---------|-----------|-----------|-----------|
| MB0129000 | PA LINDOESTE                   | 9874.5  | 1834579.5 | 0.0 | 0.0 | 2193.4 | 409637.4  |        |         | 2193.4  | 409637.4  | 2244216.9 |           |
| MB0130000 | PA ANGICAL                     | 3041.3  | 495632.7  | 0.0 | 0.0 | 413.1  | 67329.5   |        |         | 413.1   | 67329.5   | 562962.2  |           |
| MB0131000 | PA JOSE MARTINS<br>PESSOA      | 2805.6  | 521560.0  | 0.0 | 0.0 | 1048.9 | 195840.1  |        |         | 1048.9  | 195840.1  | 717400.1  |           |
| MB0132000 | PA COCALÂNDIA                  | 2916.7  | 542995.4  | 0.0 | 0.0 | 713.8  | 133304.1  |        | 393.2   | 73427.2 | 1107.0    | 206731.4  | 749726.8  |
| MB0133000 | PA JAGUATIARA                  | 2395.0  | 446069.7  | 0.0 | 0.0 | 661.2  | 123458.5  |        |         | 661.2   | 123458.5  | 569528.2  |           |
| MB0134000 | PA BARREIRO<br>COCAL           | 4217.1  | 780415.4  | 0.0 | 0.0 | 15.2   | 2805.4    |        |         | 15.2    | 2805.4    | 783220.8  |           |
| MB0135000 | PA MORESCHI                    | 4028.9  | 752958.0  | 0.0 | 0.0 | 381.1  | 71229.2   |        |         | 381.1   | 71229.2   | 824187.2  |           |
| MB0136000 | PA LAJEDO                      | 4566.2  | 845837.4  | 0.0 | 0.0 | 803.2  | 149243.0  |        |         | 803.2   | 149243.0  | 995080.4  |           |
| MB0137000 | PA PARAISO DO<br>ARAGUAIA      | 3959.7  | 694815.3  | 0.0 | 0.0 | 1442.3 | 253838.9  |        |         | 1442.3  | 253838.9  | 948654.2  |           |
| MB0138000 | PA I DE MARÇO                  | 9327.0  | 1735000.4 | 0.0 | 0.0 | 1492.8 | 278770.2  |        |         | 1492.8  | 278770.2  | 2013770.6 | 23.0      |
| MB0139000 | PA SÃO PAULO DAS<br>CACHOEIRAS | 6873.9  | 1275221.2 | 0.0 | 0.0 | 387.0  | 72022.2   |        | 13.1    | 2449.2  | 400.1     | 74471.4   | 1349692.7 |
| MB0146000 | PA INDIAPORÃ                   | 2561.9  | 423915.1  | 0.0 | 0.0 | 224.8  | 36668.7   |        |         | 224.8   | 36668.7   | 460583.8  |           |
| MB0147000 | PA AGROPECUS II                | 2002.1  | 200613.2  | 0.0 | 0.0 | 613.4  | 98725.5   |        |         | 613.4   | 98725.5   | 299338.7  |           |
| MB0148000 | PA ARAXÁ                       | 1231.8  | 199347.6  | 0.0 | 0.0 | 161.1  | 26257.0   | 251.5  | 19172.7 |         | 412.7     | 45429.7   | 244777.3  |
| MB0150000 | PA ENTRE RIOS I<br>LOTES 76    | 2444.8  | 368342.7  | 0.0 | 0.0 | 568.8  | 86509.5   | 1366.1 | 99101.4 |         | 1934.9    | 185610.9  | 553953.6  |
| MB0151000 | PA TRAVESSÃO                   | 18743.1 | 3070702.4 | 0.0 | 0.0 | 1751.4 | 285543.4  |        |         | 1751.4  | 285543.4  | 3356245.8 |           |
| MB0152000 | PA MURIÇOCA                    | 1182.3  | 199914.7  | 0.0 | 0.0 | 158.7  | 26629.0   |        |         | 158.7   | 26629.0   | 226543.7  |           |
| MB0153000 | PA DIUTÁ                       | 4620.6  | 856657.4  | 0.0 | 0.0 | 542.9  | 101119.4  | 27.9   | 5216.3  |         | 570.8     | 106335.7  | 962993.1  |
| MB0155000 | PA FRUTÃO                      | 15174.3 | 2832161.9 | 0.0 | 0.0 | 2950.8 | 551420.8  |        |         | 2950.8  | 551420.8  | 3383582.6 |           |
| MB0156000 | PA SERRA AZUL                  | 2908.7  | 543614.3  | 0.0 | 0.0 | 878.4  | 164170.1  |        |         | 878.4   | 164170.1  | 707784.4  |           |
| MB0157000 | PA PRIMAVERA DO<br>ARAGUAIA    | 2889.2  | 539528.5  | 0.0 | 0.0 | 643.2  | 120192.0  |        |         | 643.2   | 120192.0  | 659720.4  |           |
| MB0158000 | PA BOA ESPERANÇA               | 1949.9  | 363592.7  | 0.0 | 0.0 | 408.6  | 76196.1   |        |         | 408.6   | 76196.1   | 439788.8  |           |
| MB0159000 | PA VOLTA DO<br>TAPIRAPÉ        | 15559.3 | 2904931.8 | 0.0 | 0.0 | 5454.8 | 1019356.3 |        |         | 5454.8  | 1019356.3 | 3924288.1 |           |
| MB0160000 | PA ESCADA ALTA                 | 3229.3  | 597621.9  | 0.0 | 0.0 | 394.9  | 73075.8   |        |         | 394.9   | 73075.8   | 670697.7  |           |
| MB0161000 | PA SANTA CRUZ                  | 1416.6  | 230303.2  | 0.0 | 0.0 | 456.5  | 74398.7   | 19.8   | 3223.0  |         | 476.3     | 77621.6   | 307924.8  |
| MB0163000 | PA PIMENTEIRA                  | 2793.0  | 520396.4  | 0.0 | 0.0 | 475.9  | 88896.4   |        |         | 475.9   | 88896.4   | 609292.8  |           |
| MB0164000 | PA PENSÃO DA<br>ONÇA           | 3893.7  | 726933.5  | 0.0 | 0.0 | 2891.1 | 540157.3  |        | 23.2    | 4333.1  | 2914.2    | 544490.4  | 1271423.9 |
| MB0166000 | PA SÃO BRAZ                    | 2071.9  | 387204.4  | 0.0 | 0.0 | 1001.0 | 187077.4  |        |         | 1001.0  | 187077.4  | 574281.8  |           |

|           |                                |         |           |     |     |        |           |            |          |        |           |           |          |          |     |
|-----------|--------------------------------|---------|-----------|-----|-----|--------|-----------|------------|----------|--------|-----------|-----------|----------|----------|-----|
| MB0167000 | PA DOS<br>BANDEIRANTES         | 3712.9  | 693832.2  | 0.0 | 0.0 | 933.9  | 174536.2  |            |          | 933.9  | 174536.2  | 868368.4  |          |          |     |
| MB0168000 | PA CONCEIÇÃO                   | 27565.7 | 4468474.7 | 0.0 | 0.0 | 8839.4 | 1440457.8 | 51.3       | 8367.2   | 8890.7 | 1448825.0 | 5917299.7 |          |          |     |
| MB0169000 | PA HERMINIO BRITO              | 20036.4 | 3244761.9 | 0.0 | 0.0 | 6062.1 | 987896.1  | 240.2      | 39152.2  | 6302.3 | 1027048.3 | 4271810.2 |          |          |     |
| MB0170000 | PA VOLTA GRANDE                | 9503.4  | 1774471.0 | 0.0 | 0.0 | 4494.3 | 839751.8  |            |          | 4494.3 | 839751.8  | 2614222.8 |          |          |     |
| MB0171000 | PA SÃO RAIMUNDO                | 963.3   | 160544.9  | 0.0 | 0.0 | 12.7   | 2080.9    |            |          | 12.7   | 2080.9    | 162625.8  |          |          |     |
| MB0172000 | PA LANA                        | 1853.6  | 344365.5  | 0.0 | 0.0 | 527.0  | 98477.4   |            |          | 527.0  | 98477.4   | 442842.9  |          |          |     |
| MB0173000 | PA BARRO PRETO                 | 1928.1  | 360348.6  | 0.0 | 0.0 | 516.5  | 96523.7   |            |          | 516.5  | 96523.7   | 456872.3  | 13.8     |          |     |
| MB0174000 | PA CALIFORNIA                  | 1195.9  | 223465.8  | 0.0 | 0.0 | 1017.2 | 190091.3  |            |          | 1017.2 | 190091.3  | 413557.1  |          |          |     |
| MB0175000 | PA DO MEIO                     | 2925.2  | 545170.9  | 0.0 | 0.0 | 470.4  | 87874.4   |            |          | 470.4  | 87874.4   | 633045.3  |          |          |     |
| MB0176000 | PA GAMELEIRA AÇÚ               | 2750.6  | 512092.9  | 0.0 | 0.0 | 572.0  | 106774.7  |            |          | 572.0  | 106774.7  | 618867.6  |          |          |     |
| MB0177000 | PA GRANDE<br>VITORIA           | 2781.9  | 509413.1  | 0.0 | 0.0 | 1203.5 | 213681.9  | 642.3      | 112408.7 | 1845.8 | 326090.6  | 835503.7  | 80.8     |          |     |
| MB0178000 | PA TERRA ROXA                  | 2153.3  | 402426.6  | 0.0 | 0.0 | 938.8  | 175428.8  |            |          | 938.8  | 175428.8  | 577855.4  |          |          |     |
| MB0181000 | PA ENTRE RIOS II<br>LOTE 79    | 269.7   | 28307.8   | 0.0 | 0.0 | 135.4  | 19314.8   | 4911.<br>4 | 350245.9 | 5046.8 | 369560.7  | 397868.4  |          |          |     |
| MB0182000 | PA ENTRE RIOS III<br>LOTE 80   | 1322.3  | 201542.1  | 0.0 | 0.0 | 66.5   | 10143.3   | 2677.<br>7 | 358761.8 | 2744.2 | 368905.1  | 570447.2  |          |          |     |
| MB0183000 | PA MANUELITO                   | 2113.6  | 393430.1  | 0.0 | 0.0 | 395.1  | 73722.6   |            |          | 395.1  | 73722.6   | 467152.7  |          |          |     |
| MB0184000 | PA SERRA<br>QUEBRADA           | 1652.3  | 307778.5  | 0.0 | 0.0 | 471.2  | 88036.1   |            |          | 471.2  | 88036.1   | 395814.6  | 1.3      |          |     |
| MB0185000 | PA SANTA AMÉLIA                | 1142.5  | 213497.6  | 0.0 | 0.0 | 737.0  | 137732.0  |            |          | 4.6    | 852.9     | 741.6     | 138584.9 | 352082.5 | 3.5 |
| MB0186000 | PA CIGANA                      | 1271.2  | 236952.4  | 0.0 | 0.0 | 583.6  | 108916.8  |            |          | 40.9   | 7650.9    | 624.5     | 116567.7 | 353520.1 |     |
| MB0187000 | PA SAO GABRIEL                 | 1443.4  | 268830.1  | 0.0 | 0.0 | 800.1  | 149447.8  |            |          | 134.4  | 25028.9   | 934.4     | 174476.7 | 443306.9 |     |
| MB0188000 | PA CROÁ                        | 1569.6  | 290689.3  | 0.0 | 0.0 | 53.6   | 9943.3    |            |          |        |           | 53.6      | 9943.3   | 300632.6 |     |
| MB0189000 | PA OITO BARRACAS               | 3430.4  | 640687.0  | 0.0 | 0.0 | 373.0  | 69702.0   |            |          | 373.0  | 69702.0   | 710388.9  |          |          |     |
| MB0190000 | PA RIO MAR                     | 3473.2  | 566541.0  | 0.0 | 0.0 | 255.9  | 41696.4   |            |          | 255.9  | 41696.4   | 608237.5  | 12.5     |          |     |
| MB0191000 | PA SÃO JOSÉ DO<br>ARAGUAIA     | 4098.8  | 739911.9  | 0.0 | 0.0 | 102.3  | 17381.0   |            |          | 102.3  | 17381.0   | 757292.9  | 79.3     |          |     |
| MB0192000 | PA MANOEL DOS<br>REIS          | 4369.7  | 788937.2  | 0.0 | 0.0 | 16.0   | 2604.2    |            |          | 16.0   | 2604.2    | 791541.4  |          |          |     |
| MB0193000 | PA FRANCISCO<br>NUNES TEIXEIRA | 9307.3  | 1591860.5 | 0.0 | 0.0 | 228.9  | 38106.8   |            |          | 228.9  | 38106.8   | 1629967.3 |          |          |     |
| MB0194000 | PA DJALMA CASTRO               | 12805.5 | 2114730.0 | 0.0 | 0.0 | 1188.1 | 193960.5  |            |          | 1188.1 | 193960.5  | 2308690.5 |          |          |     |
| MB0195000 | PA CARLOS PEREIRA<br>NUNES     | 2606.8  | 482419.0  | 0.0 | 0.0 | 258.5  | 47846.0   |            |          | 258.5  | 47846.0   | 530265.0  | 259.0    |          |     |
| MB0196000 | PA VINAGRE                     | 2279.4  | 425999.3  | 0.0 | 0.0 | 861.1  | 160931.3  |            |          | 861.1  | 160931.3  | 586930.7  | 28.3     |          |     |

|           |                                 |         |           |     |     |        |          |       |         |          |           |          |      |
|-----------|---------------------------------|---------|-----------|-----|-----|--------|----------|-------|---------|----------|-----------|----------|------|
| MB0197000 | PA RIO PRETO<br>MALHA II        | 2914.4  | 544512.6  | 0.0 | 0.0 | 705.4  | 131829.1 |       | 705.4   | 131829.1 | 676341.7  |          |      |
| MB0198000 | PA GOIANOS                      | 3549.7  | 663411.3  | 0.0 | 0.0 | 1597.5 | 298553.4 |       | 1597.5  | 298553.4 | 961964.7  | 56.0     |      |
| MB0200000 | PA CASTANHEIRA II               | 3456.5  | 563311.8  | 0.0 | 0.0 | 319.3  | 52037.2  |       | 319.3   | 52037.2  | 615349.0  |          |      |
| MB0201000 | PA CRISTO REI                   | 2632.5  | 487689.4  | 0.0 | 0.0 | 665.5  | 123736.8 |       | 665.5   | 123736.8 | 611426.2  |          |      |
| MB0202000 | PA BETH<br>PA BELO              | 1819.4  | 339342.7  | 0.0 | 0.0 | 182.1  | 34001.2  |       | 182.1   | 34001.2  | 373343.9  |          |      |
| MB0203000 | HORIZONTE                       | 3451.1  | 638874.3  | 0.0 | 0.0 | 76.7   | 14235.3  |       | 76.7    | 14235.3  | 653109.6  |          |      |
| MB0204000 | PA ARRAIALANDIA                 | 4953.6  | 923100.0  | 0.0 | 0.0 | 1380.6 | 257802.8 |       | 1380.6  | 257802.8 | 1180902.8 |          |      |
| MB0206000 | PA RIO ITACOROA                 | 2516.3  | 465937.5  | 0.0 | 0.0 | 1433.5 | 265658.9 | 92.0  | 17168.3 | 1525.6   | 282827.2  | 748764.7 | 0.9  |
| MB0208000 | PA SANTA FÉ                     | 2362.1  | 439893.9  | 0.0 | 0.0 | 674.6  | 126046.6 | 125.7 | 23492.5 | 800.3    | 149539.1  | 589433.0 |      |
| MB0209000 | PA LA ESTANÇIA                  | 2779.3  | 516630.1  | 0.0 | 0.0 | 544.7  | 101230.1 |       | 544.7   | 101230.1 | 617860.2  |          |      |
| MB0210000 | PA CONQUISTA                    | 2069.8  | 385706.0  | 0.0 | 0.0 | 680.4  | 127158.7 |       | 680.4   | 127158.7 | 512864.7  |          |      |
| MB0211000 | PA MURAJUBA                     | 1703.3  | 317712.1  | 0.0 | 0.0 | 682.9  | 127623.1 |       | 682.9   | 127623.1 | 445335.2  |          |      |
| MB0212000 | PA PRINCESA                     | 2226.8  | 416006.7  | 0.0 | 0.0 | 696.9  | 130199.2 |       | 696.9   | 130199.2 | 546205.9  | 85.9     |      |
| MB0213000 | PA TARTARUGA                    | 2621.7  | 489918.1  | 0.0 | 0.0 | 981.4  | 183177.3 |       | 981.4   | 183177.3 | 673095.4  | 108.8    |      |
| MB0214000 | PA IGUAÇU<br>PA BARREIRA        | 904.9   | 168890.3  | 0.0 | 0.0 | 167.5  | 31299.5  |       | 167.5   | 31299.5  | 200189.8  |          |      |
| MB0217000 | BRANCA<br>PA VALE DO            | 3362.9  | 602172.8  | 0.0 | 0.0 | 63.4   | 10345.0  |       | 63.4    | 10345.0  | 612517.8  |          |      |
| MB0218000 | MUCURA                          | 9899.9  | 1647351.4 | 0.0 | 0.0 | 904.4  | 147475.9 |       | 904.4   | 147475.9 | 1794827.3 |          |      |
| MB0219000 | PA DOURADA<br>PA VOLTINHA DO    | 2147.6  | 397634.6  | 0.0 | 0.0 | 50.8   | 9448.7   |       | 50.8    | 9448.7   | 407083.4  |          |      |
| MB0220000 | ITACAIUNAS                      | 885.3   | 165404.7  | 0.0 | 0.0 | 515.3  | 96301.9  | 73.8  | 13795.9 | 589.1    | 110097.8  | 275502.4 | 69.3 |
| MB0221000 | PA BRASILESPANHA                | 3354.4  | 620758.9  | 0.0 | 0.0 | 235.3  | 43550.9  |       | 235.3   | 43550.9  | 664309.8  |          |      |
| MB0222000 | PA BRASIL NOVO                  | 1953.7  | 365126.0  | 0.0 | 0.0 | 555.5  | 103813.1 |       | 555.5   | 103813.1 | 468939.1  |          |      |
| MB0223000 | PA ALTO BONITO                  | 2781.9  | 519896.0  | 0.0 | 0.0 | 780.7  | 145875.9 |       | 780.7   | 145875.9 | 665771.9  | 0.0      |      |
| MB0224000 | PA JATOBÁ                       | 1838.5  | 341326.6  | 0.0 | 0.0 | 144.4  | 26925.9  |       | 144.4   | 26925.9  | 368252.5  |          |      |
| MB0225000 | PA SAPUCAIA<br>PA SÃO SEBASTIÃO | 3079.3  | 573698.8  | 0.0 | 0.0 | 160.8  | 30047.2  |       | 160.8   | 30047.2  | 603745.9  |          |      |
| MB0226000 | DO XINGÚ                        | 8837.4  | 1644300.6 | 0.0 | 0.0 | 3611.1 | 672508.7 |       | 3611.1  | 672508.7 | 2316809.4 |          |      |
| MB0227000 | PA MARIA RITA                   | 2684.7  | 464497.5  | 0.0 | 0.0 | 127.8  | 20902.4  |       | 127.8   | 20902.4  | 485399.9  |          |      |
| MB0228000 | PA PIMENTA                      | 5393.4  | 849788.8  | 0.0 | 0.0 | 872.9  | 133914.9 | 138.6 | 6631.6  | 1011.5   | 140546.5  | 990335.3 |      |
| MB0229000 | PA PAU BRASIL                   | 15423.7 | 2520288.7 | 0.0 | 0.0 | 5690.5 | 940089.2 |       | 5690.5  | 940089.2 | 3460377.9 | 5.9      |      |

|           |                                    |         |           |     |     |        |           |       |         |        |           |           |           |           |
|-----------|------------------------------------|---------|-----------|-----|-----|--------|-----------|-------|---------|--------|-----------|-----------|-----------|-----------|
| MB0230000 | PA AIRTON SENA                     | 9562.9  | 1564638.9 | 0.0 | 0.0 | 4124.2 | 679094.8  |       |         | 4124.2 | 679094.8  | 2243733.7 |           |           |
| MB0231000 | PA RIO CRISTALINO                  | 11635.8 | 1896743.2 | 0.0 | 0.0 | 4191.9 | 686658.6  |       |         | 4191.9 | 686658.6  | 2583401.8 |           |           |
| MB0232000 | PA NICOBRA<br>PA RIO CAMPO         | 20182.0 | 3322351.2 | 0.0 | 0.0 | 7952.9 | 1298389.8 |       |         | 7952.9 | 1298389.8 | 4620741.0 |           |           |
| MB0233000 | ALEGRE                             | 10212.0 | 1663871.0 | 0.0 | 0.0 | 3586.1 | 580883.9  |       |         | 3586.1 | 580883.9  | 2244754.9 |           |           |
| MB0234000 | PA PAJEÚ                           | 2090.3  | 389129.9  | 0.0 | 0.0 | 622.9  | 116387.2  |       | 12.2    | 2279.5 | 635.1     | 118666.8  | 507796.6  |           |
| MB0235000 | PA SANTA IZABEL                    | 1816.5  | 337171.3  | 0.0 | 0.0 | 483.6  | 90054.2   |       | 19.3    | 3581.6 | 502.9     | 93635.8   | 430807.0  |           |
| MB0236000 | PA CODESPAR                        | 10277.7 | 1709908.5 | 0.0 | 0.0 | 133.4  | 21786.0   |       |         |        | 133.4     | 21786.0   | 1731694.5 |           |
| MB0237000 | PA INAJA II<br>PA EXPEDITO         | 10178.2 | 1606343.0 | 0.0 | 0.0 | 810.3  | 110240.0  | 0.2   | 17.6    |        | 810.5     | 110257.5  | 1716600.5 |           |
| MB0238000 | RIBEIRO                            | 1895.6  | 334962.5  | 0.0 | 0.0 | 239.7  | 40083.5   | 396.1 | 73221.9 |        | 635.8     | 113305.4  | 448268.0  |           |
| MB0239000 | PA BRASIL 500                      | 8104.6  | 1341373.9 | 0.0 | 0.0 | 348.8  | 56891.6   | 3.4   | 561.7   |        | 352.2     | 57453.3   | 1398827.2 |           |
| MB0240000 | PA NOVO MUNDO<br>PA ALTO BONITO DO | 17739.1 | 2926952.1 | 0.0 | 0.0 | 1762.5 | 287642.2  |       |         |        | 1762.5    | 287642.2  | 3214594.3 |           |
| MB0241000 | AXIXÁ                              | 5656.5  | 1057134.8 | 0.0 | 0.0 | 978.8  | 182929.7  |       |         |        | 978.8     | 182929.7  | 1240064.6 |           |
| MB0242000 | PA RAINHA<br>PA BOM JARDIM DA      | 3666.3  | 679263.3  | 0.0 | 0.0 | 846.7  | 157598.4  |       |         |        | 846.7     | 157598.4  | 836861.7  | 6.4       |
| MB0244000 | VOLTINHA                           | 1973.9  | 368856.4  | 0.0 | 0.0 | 992.4  | 185474.1  |       |         |        | 992.4     | 185474.1  | 554330.6  | 22.9      |
| MB0245000 | PA SÃO GERALDO                     | 5182.7  | 965017.8  | 0.0 | 0.0 | 865.4  | 161654.6  |       |         | 4.1    | 770.0     | 869.5     | 162424.6  | 1127442.4 |
| MB0246000 | PA MOÇA BONITA<br>PA NOVA          | 2763.0  | 515374.7  | 0.0 | 0.0 | 658.0  | 122939.4  |       |         |        | 658.0     | 122939.4  | 638314.1  |           |
| MB0247000 | ITAPERUNA                          | 2030.9  | 378239.9  | 0.0 | 0.0 | 712.4  | 133101.1  |       |         |        | 712.4     | 133101.1  | 511341.0  |           |
| MB0248000 | PA CASARÃO<br>PA BOA ESPERANÇA     | 2937.3  | 545640.5  | 0.0 | 0.0 | 136.4  | 25487.9   |       |         | 0.0    | 7.3       | 136.4     | 25495.3   | 571135.7  |
| MB0249000 | DO BURGO<br>PA SABINO SÃO          | 3878.6  | 723315.1  | 0.0 | 0.0 | 897.1  | 167631.5  |       |         |        | 897.1     | 167631.5  | 890946.6  |           |
| MB0250000 | PEDRO                              | 2355.4  | 434748.7  | 0.0 | 0.0 | 148.9  | 27005.9   |       |         |        | 148.9     | 27005.9   | 461754.6  |           |
| MB0251000 | PA TERRA NOVA                      | 5572.3  | 1031195.6 | 0.0 | 0.0 | 167.0  | 30913.1   |       |         |        | 167.0     | 30913.1   | 1062108.7 |           |
| MB0252000 | PA BOM LUGAR                       | 2358.9  | 436544.3  | 0.0 | 0.0 | 0.1    | 21.8      |       |         |        | 0.1       | 21.8      | 436566.1  |           |
| MB0253000 | PA TIRA CATINGA                    | 1591.0  | 294433.6  | 0.0 | 0.0 |        |           |       |         |        | 0.0       | 0.0       | 294433.6  |           |
| MB0255000 | PA CABANAGEM                       | 1695.1  | 316703.5  | 0.0 | 0.0 | 771.0  | 144056.7  |       |         |        | 771.0     | 144056.7  | 460760.3  |           |
| MB0256000 | PA CÍCO                            | 6509.3  | 1216376.2 | 0.0 | 0.0 | 4793.0 | 895730.0  |       |         |        | 4793.0    | 895730.0  | 2112106.2 |           |
| MB0257000 | PA MARAVILHA<br>PA CARLOS          | 7497.6  | 1401225.7 | 0.0 | 0.0 | 2736.9 | 511505.1  |       |         |        | 2736.9    | 511505.1  | 1912730.8 |           |
| MB0258000 | FONSECA                            | 4203.6  | 778741.6  | 0.0 | 0.0 | 227.5  | 42315.2   |       |         |        | 227.5     | 42315.2   | 821056.8  |           |
| MB0259000 | PA CAJARANA                        | 1032.6  | 192937.7  | 0.0 | 0.0 | 464.7  | 86822.8   |       |         |        | 464.7     | 86822.8   | 279760.5  |           |

|           |                                                         |         |           |     |     |        |          |       |          |        |          |           |
|-----------|---------------------------------------------------------|---------|-----------|-----|-----|--------|----------|-------|----------|--------|----------|-----------|
| MB0260000 | PA SANTA MARIA DO ITACAIUNAS                            | 1704.6  | 318575.7  | 0.0 | 0.0 | 701.3  | 131063.3 |       |          | 701.3  | 131063.3 | 449639.0  |
| MB0262000 | PA CONTINENTAL PA LAGO VERMELHO                         | 2430.6  | 451604.1  | 0.0 | 0.0 | 336.2  | 62783.6  |       |          | 336.2  | 62783.6  | 514387.7  |
| MB0263000 | PA MONTEPIO                                             | 4225.3  | 787911.4  | 0.0 | 0.0 | 1548.4 | 289297.2 |       |          | 1548.4 | 289297.2 | 1077208.6 |
| MB0264000 | PA BRASILIA                                             | 5918.8  | 1094374.0 | 0.0 | 0.0 | 150.3  | 27813.8  |       |          | 150.3  | 27813.8  | 1122187.8 |
| MB0265000 | PA CHICO MENDES II PA NOSSA SENHORA DO PERPÉTUO SOCORRO | 1452.5  | 269778.0  | 0.0 | 0.0 | 449.2  | 83817.6  | 609.9 | 113774.3 | 1059.1 | 197591.9 | 467369.9  |
| MB0267000 | PA CHICO MENDES I                                       | 1488.1  | 275108.1  | 0.0 | 0.0 | 143.0  | 26384.3  |       |          | 143.0  | 26384.3  | 301492.4  |
| MB0268000 | PA ALEGRIA                                              | 870.0   | 161914.7  | 0.0 | 0.0 | 341.2  | 63753.7  | 928.1 | 173363.3 | 1269.3 | 237116.9 | 399031.7  |
| MB0269000 | PA MÃE MARIA PA ESTRELA DO NORTE                        | 3149.6  | 587946.7  | 0.0 | 0.0 | 427.3  | 79850.8  |       |          | 427.3  | 79850.8  | 667797.5  |
| MB0270000 | PA BOA SORTE                                            | 2619.0  | 484977.8  | 0.0 | 0.0 | 683.7  | 126715.3 |       |          | 683.7  | 126715.3 | 611693.1  |
| MB0271000 | PA CASA BRANCA                                          | 4079.4  | 760357.3  | 0.0 | 0.0 | 1097.4 | 204924.3 |       |          | 1097.4 | 204924.3 | 965281.6  |
| MB0272000 | PA CAPSS                                                | 1194.7  | 217370.1  | 0.0 | 0.0 | 694.1  | 125784.7 | 33.8  | 6194.2   | 728.0  | 131979.0 | 349349.1  |
| MB0273000 | PA CHIBIL                                               | 18114.5 | 2990357.0 | 0.0 | 0.0 | 1476.2 | 240858.2 |       |          | 1476.2 | 240858.2 | 3231215.2 |
| MB0274000 | PA SANTA EUDOXIA PA BARRA DO CEDRO                      | 1805.0  | 336315.2  | 0.0 | 0.0 | 1116.9 | 208670.2 |       |          | 1116.9 | 208670.2 | 544985.3  |
| MB0275000 | PA SANTA EUDOXIA PA BARRA DO CEDRO                      | 2114.7  | 348088.5  | 0.0 | 0.0 | 472.3  | 77116.3  | 94.3  | 15788.5  | 566.5  | 92904.7  | 440993.2  |
| MB0276000 | PA MARINGÁ PA MIGUEL GOMES DA SILVA                     | 2940.8  | 490464.7  | 0.0 | 0.0 | 73.4   | 12015.2  |       |          | 73.4   | 12015.2  | 502479.8  |
| MB0277000 | PA BOQUEIRÃO                                            | 542.5   | 100956.0  | 0.0 | 0.0 | 449.0  | 83885.8  |       |          | 449.0  | 83885.8  | 184841.8  |
| MB0278000 | PA PEDRA PRETA                                          | 3774.2  | 652766.0  | 0.0 | 0.0 | 387.8  | 63715.3  |       |          | 387.8  | 63715.3  | 716481.4  |
| MB0279000 | PA UIRAPURÚ                                             | 1372.6  | 227741.9  | 0.0 | 0.0 | 73.4   | 12051.3  |       |          | 73.4   | 12051.3  | 239793.2  |
| MB0280000 | PA RANCHARIA                                            | 2532.5  | 468987.8  | 0.0 | 0.0 | 232.7  | 43220.0  | 705.9 | 126612.9 | 938.6  | 169832.8 | 638820.6  |
| MB0281000 | PA VISTA ALEGRE                                         | 2556.8  | 465109.3  | 0.0 | 0.0 | 106.3  | 19361.7  | 22.0  | 1830.9   | 128.4  | 21192.5  | 486301.8  |
| MB0282000 | PA ACAPU                                                | 2431.6  | 386345.1  | 0.0 | 0.0 | 160.8  | 24531.8  |       |          | 160.8  | 24531.8  | 410876.9  |
| MB0283000 | PA VALE DA SERRA                                        | 1944.3  | 363375.8  | 0.0 | 0.0 | 1128.3 | 210869.4 |       |          | 1128.3 | 210869.4 | 574245.1  |
| MB0284000 | PA VISTA ALEGRE                                         | 1738.7  | 324149.6  | 0.0 | 0.0 | 1388.0 | 259097.8 |       |          | 1388.0 | 259097.8 | 583247.4  |
| MB0286000 | PA VALE DA SERRA                                        | 1500.4  | 279123.4  | 0.0 | 0.0 | 517.7  | 96678.8  | 80.9  | 15107.3  | 598.6  | 111786.1 | 390909.5  |
| MB0287000 | PA VALE DA SERRA                                        | 969.1   | 180247.0  | 0.0 | 0.0 | 51.2   | 9484.0   | 0.7   | 126.5    | 51.8   | 9610.5   | 189857.5  |
| MB0288000 | PA VALE DA SERRA                                        | 2051.2  | 379976.4  | 0.0 | 0.0 | 109.0  | 20176.7  | 25.4  | 4744.3   | 134.4  | 24921.0  | 404897.4  |

|           |                               |         |           |     |     |        |           |        |           |           |          |          |
|-----------|-------------------------------|---------|-----------|-----|-----|--------|-----------|--------|-----------|-----------|----------|----------|
| MB0289000 | PA UNIAO DA VITORIA           | 3807.8  | 703440.4  | 0.0 | 0.0 | 352.6  | 64838.5   | 352.6  | 64838.5   | 768278.9  |          |          |
| MB0290000 | PA JERONIMO NUNES LACERDA     | 3651.5  | 673715.7  | 0.0 | 0.0 | 106.0  | 18926.9   | 106.0  | 18926.9   | 692642.7  |          |          |
| MB0291000 | PA MARIA DE LOURDES RODRIGUES | 4154.8  | 768885.8  | 0.0 | 0.0 | 30.0   | 5544.5    | 30.0   | 5544.5    | 774430.3  |          |          |
| MB0292000 | PA LARANJEIRAS                | 5517.7  | 1029430.3 | 0.0 | 0.0 | 1773.9 | 331451.0  | 1773.9 | 331451.0  | 1360881.4 |          |          |
| MB0293000 | PA RIO PARA                   | 3255.0  | 607949.2  | 0.0 | 0.0 | 2168.8 | 405216.6  | 2168.8 | 405216.6  | 1013165.8 |          |          |
| MB0294000 | PA RIO CINZA                  | 4313.6  | 804521.8  | 0.0 | 0.0 | 1302.3 | 243382.3  | 1302.3 | 243382.3  | 1047904.1 |          |          |
| MB0295000 | PA RIO NEGRO                  | 2996.1  | 559831.1  | 0.0 | 0.0 | 1393.0 | 260328.2  | 1393.0 | 260328.2  | 820159.3  |          |          |
| MB0296000 | PA ARAPARI                    | 9408.6  | 1756264.3 | 0.0 | 0.0 | 4816.1 | 900077.0  | 4816.1 | 900077.0  | 2656341.3 |          |          |
| MB0297000 | PA EMÍDIO BATISTA DE MOURA    | 11466.8 | 2122054.6 | 0.0 | 0.0 | 269.3  | 49828.8   | 269.3  | 49828.8   | 2171883.4 |          |          |
| MB0298000 | PA 21 DE ABRIL                | 1705.1  | 315609.6  | 0.0 | 0.0 | 69.8   | 12954.1   | 69.8   | 12954.1   | 328563.7  |          |          |
| MB0299000 | PA VALENTIM SERRA             | 1986.8  | 369259.9  | 0.0 | 0.0 | 301.3  | 56289.4   | 301.3  | 56289.4   | 425549.3  |          |          |
| MB0306000 | PA BEIRA RIO                  | 1307.1  | 244292.6  | 0.0 | 0.0 | 563.8  | 105362.4  | 563.8  | 105362.4  | 349655.0  |          |          |
| MB0307000 | PA BURGO                      | 3142.5  | 584049.2  | 0.0 | 0.0 | 451.8  | 84294.5   | 451.8  | 84294.5   | 668343.7  |          |          |
| MB0308000 | PA CARIMÃ                     | 1454.7  | 270719.5  | 0.0 | 0.0 | 625.3  | 116853.3  | 625.3  | 116853.3  | 387572.8  |          |          |
| MB0309000 | PA BELO MIRAR                 | 3297.8  | 613241.5  | 0.0 | 0.0 | 194.1  | 36130.9   | 194.1  | 36130.9   | 649372.4  |          |          |
| MB0310000 | PA NOSSA SENHORA DAS GRAÇAS   | 3395.6  | 630789.9  | 0.0 | 0.0 | 169.8  | 31668.1   | 169.8  | 31668.1   | 662458.1  |          |          |
| MB0311000 | PA BOCA DO LAGO               | 2906.2  | 542437.7  | 0.0 | 0.0 | 466.3  | 87132.3   | 466.3  | 87132.3   | 629570.0  |          |          |
| MB0313000 | PA BORRACHEIRA                | 2143.6  | 400619.5  | 0.0 | 0.0 | 424.2  | 79282.1   | 424.2  | 79282.1   | 479901.6  |          |          |
| MB0314000 | PA ARICA                      | 1653.7  | 300013.6  | 0.0 | 0.0 | 0.7    | 121.0     | 0.7    | 121.0     | 300134.6  |          |          |
| MB0315000 | PA MINEIRO PRETO              | 6668.1  | 1246082.0 | 0.0 | 0.0 | 3277.2 | 612445.6  | 3277.2 | 612445.6  | 1858527.6 |          |          |
| MB0316000 | PA ALTO PACAJÁ                | 9429.6  | 1762292.6 | 0.0 | 0.0 | 4030.2 | 753196.7  | 4030.2 | 753196.7  | 2515489.3 |          |          |
| MB0317000 | PA BOCA LARGA                 | 4893.6  | 914571.5  | 0.0 | 0.0 | 2072.5 | 387331.2  | 2072.5 | 387331.2  | 1301902.7 |          |          |
| MB0318000 | PA JACARÉ-AÇÚ                 | 6163.4  | 1151876.9 | 0.0 | 0.0 | 5362.0 | 1002105.6 | 5362.0 | 1002105.6 | 2153982.5 |          |          |
| MB0319000 | PA JOSÉ CIRILO GOMES          | 7137.6  | 1333409.4 | 0.0 | 0.0 | 3042.6 | 568548.4  | 3042.6 | 568548.4  | 1901957.8 |          |          |
| MB0320000 | PA RIO PRETO                  | 3809.2  | 711030.0  | 0.0 | 0.0 | 2113.0 | 394800.4  | 2113.0 | 394800.4  | 1105830.4 |          |          |
| MB0321000 | PA CASCALHO                   | 1540.4  | 287688.4  | 0.0 | 0.0 | 1128.5 | 210793.6  | 0.0    | 3.5       | 1128.5    | 210797.0 | 498485.5 |
| MB0322000 | PA NOVA VIDA                  | 1912.1  | 357035.7  | 0.0 | 0.0 | 1076.5 | 201193.7  | 1076.5 | 201193.7  | 558229.4  |          |          |



|           |                                   |         |            |     |     |         |           |       |          |        |           |           |           |            |      |
|-----------|-----------------------------------|---------|------------|-----|-----|---------|-----------|-------|----------|--------|-----------|-----------|-----------|------------|------|
| MB0323000 | PA CASTANHAL<br>RATO II           | 1357.6  | 246431.3   | 0.0 | 0.0 | 115.1   | 20338.5   |       |          | 115.1  | 20338.5   | 266769.8  |           |            |      |
| MB0324000 | PA SANTA MARIA                    | 1258.2  | 235143.5   | 0.0 | 0.0 | 892.5   | 166803.0  | 7.4   | 1383.9   | 899.9  | 168186.9  | 403330.4  |           |            |      |
| MB0325000 | PA SANTA LIDUINA                  | 1113.5  | 207891.8   | 0.0 | 0.0 | 785.0   | 146687.1  | 11.8  | 2201.5   | 796.8  | 148888.6  | 356780.4  |           |            |      |
| MB0326000 | PA IOLANDA                        | 2385.6  | 444857.2   | 0.0 | 0.0 | 1048.0  | 195815.7  | 4.5   | 838.7    | 1052.5 | 196654.3  | 641511.5  |           |            |      |
| MB0327000 | PA SÃO JOSE                       | 4266.6  | 789487.6   | 0.0 | 0.0 | 235.4   | 43567.3   |       |          | 235.4  | 43567.3   | 833054.8  |           |            |      |
| MB0328000 | PA PAU FERRADO                    | 2830.9  | 513293.5   | 0.0 | 0.0 | 119.1   | 20261.8   |       |          | 119.1  | 20261.8   | 533555.4  |           |            |      |
| MB0329000 | PA BEIJA FLOR II                  | 635.8   | 118828.1   | 0.0 | 0.0 | 144.9   | 27083.4   | 385.3 | 72017.5  | 530.3  | 99100.8   | 217929.0  |           |            |      |
| MB0330000 | PA AMAPÁ I                        | 1936.0  | 360196.7   | 0.0 | 0.0 | 819.7   | 153123.6  | 607.6 | 113540.9 | 1427.3 | 266664.5  | 626861.2  |           |            |      |
| MB0331000 | PA ALTO<br>AMAZONAS               | 1321.2  | 246778.9   | 0.0 | 0.0 | 1081.9  | 202129.6  | 8.2   | 1537.3   | 1090.2 | 203666.9  | 450445.8  |           |            |      |
| MB0332000 | PA BARRAGEIRA                     | 1263.9  | 235532.7   | 0.0 | 0.0 | 1391.0  | 259868.7  | 319.1 | 59619.4  | 1710.2 | 319488.2  | 555020.9  |           |            |      |
| MB0333000 | PA CACHOEIRINHA                   | 845.1   | 157911.5   | 0.0 | 0.0 | 376.9   | 70432.5   | 30.6  | 5717.1   | 407.5  | 76149.6   | 234061.1  |           |            |      |
| MB0334000 | PA AMAPA II                       | 1356.0  | 252062.2   | 0.0 | 0.0 | 583.1   | 108883.6  | 578.5 | 108113.2 | 1161.6 | 216996.8  | 469059.1  |           |            |      |
| MB0335000 | PA SÃO GERALDO<br>DO REPARTIMENTO | 1144.5  | 213895.1   | 0.0 | 0.0 | 952.7   | 178046.9  | 0.1   | 21.1     | 952.8  | 178068.0  | 391963.1  |           |            |      |
| MB0336000 | PA NOVO MUNDO<br>DO ITUPIRANGA    | 985.6   | 183987.1   | 0.0 | 0.0 | 255.4   | 47729.5   |       |          | 255.4  | 47729.5   | 231716.6  |           |            |      |
| MB0337000 | PA BOA ESPERANÇA<br>DO ARAGUAIA   | 2591.7  | 479626.8   | 0.0 | 0.0 | 121.1   | 22419.3   |       |          | 121.1  | 22419.3   | 502046.0  |           |            |      |
| MB0338000 | PA UNIÃO                          | 1887.3  | 351328.8   | 0.0 | 0.0 | 1039.7  | 194245.8  |       |          | 1039.7 | 194245.8  | 545574.6  |           |            |      |
| MB0339000 | PA JERUZALÉM                      | 1898.3  | 352893.3   | 0.0 | 0.0 | 713.2   | 133243.6  |       |          | 713.2  | 133243.6  | 486136.9  |           |            |      |
| MB0340000 | PA SANTA<br>TEREZINHA             | 2274.5  | 386844.3   | 0.0 | 0.0 | 181.9   | 30187.2   |       |          | 181.9  | 30187.2   | 417031.5  | 13.3      |            |      |
| MB0341000 | PA SAMAUMA                        | 1407.2  | 261397.5   | 0.0 | 0.0 | 143.5   | 26814.5   |       |          | 143.5  | 26814.5   | 288212.0  |           |            |      |
| MB0342000 | PA MARRECAS DO<br>ARAGUAIA        | 3019.4  | 437596.6   | 0.0 | 0.0 | 445.3   | 47570.1   | 120.1 | 11093.5  | 565.5  | 58663.6   | 496260.2  |           |            |      |
| MB0343000 | PA CUXIÚ                          | 274.7   | 51337.7    | 0.0 | 0.0 | 220.9   | 41286.0   |       |          | 220.9  | 41286.0   | 92623.7   |           |            |      |
| MB0344000 | PA JOSE PINHEIRO<br>LIMA          | 3068.6  | 570913.3   | 0.0 | 0.0 | 920.7   | 172024.4  |       |          | 920.7  | 172024.4  | 742937.7  |           |            |      |
| MB0345000 | PA JURUNA                         | 5976.5  | 1114136.8  | 0.0 | 0.0 | 6145.4  | 1147763.0 | 89.5  | 16720.1  | 6234.9 | 1164483.1 | 2278619.9 |           |            |      |
| MB0346000 | PA PALMARES SUL                   | 12680.1 | 2356680.3  | 0.0 | 0.0 | 2926.3  | 546336.9  |       |          | 2926.3 | 546336.9  | 2903017.3 |           |            |      |
| MB0347000 | PA ALCOBAÇA                       | 84440.4 | 15654471.8 | 0.0 | 0.0 | 15782.4 | 2933784.0 | 13.7  | 2533.7   | 2694.6 | 499122.8  | 18490.7   | 3435440.4 | 19089912.3 | 95.1 |
| MB0351000 | PA IGARAPE DO<br>RATO             | 1967.3  | 365574.9   | 0.0 | 0.0 | 222.0   | 41373.8   |       |          | 222.0  | 41373.8   | 406948.7  |           |            |      |
| MB0352000 | PA ARAÇATUBA<br>CARAJÁS           | 1355.4  | 251248.8   | 0.0 | 0.0 | 60.6    | 11329.3   |       |          | 60.6   | 11329.3   | 262578.1  |           |            |      |
| MB0353000 | PA 4 DE JUNHO                     | 1036.3  | 192997.2   | 0.0 | 0.0 | 157.7   | 29469.5   |       |          | 157.7  | 29469.5   | 222466.7  |           |            |      |

|           |                            |        |           |     |     |       |          |        |          |        |          |           |
|-----------|----------------------------|--------|-----------|-----|-----|-------|----------|--------|----------|--------|----------|-----------|
| MB0354000 | PA JARDIM                  | 1778.4 | 330945.3  | 0.0 | 0.0 | 451.3 | 84289.2  |        |          | 451.3  | 84289.2  | 415234.5  |
| MB0355000 | PA FÊNIX                   | 1431.5 | 242513.8  | 0.0 | 0.0 | 22.5  | 3700.1   |        |          | 22.5   | 3700.1   | 246213.9  |
| MB0356000 | PA JOSÉ DUTRA DA COSTA     | 2694.7 | 502666.8  | 0.0 | 0.0 | 187.1 | 34973.7  | 44.7   | 8349.0   | 231.9  | 43322.7  | 545989.5  |
| MB0358000 | PA NOSSA SENHORA APARECIDA | 3164.6 | 587768.9  | 0.0 | 0.0 | 240.2 | 44705.4  |        |          | 240.2  | 44705.4  | 632474.4  |
| MB0359000 | PA NOVA VITORIA            | 5493.8 | 1022711.6 | 0.0 | 0.0 | 373.7 | 69789.5  | 98.9   | 18461.7  | 472.6  | 88251.2  | 1110962.8 |
| MB0360000 | PA UNIDOS PARA VENCER      | 1808.2 | 337391.3  | 0.0 | 0.0 | 310.1 | 57933.2  |        |          | 310.1  | 57933.2  | 395324.5  |
| MB0361000 | PA PIQUIÁ                  | 4216.7 | 780356.1  | 0.0 | 0.0 | 270.5 | 50053.5  |        |          | 270.5  | 50053.5  | 830409.5  |
| MB0363000 | PA PIRASSUNUNGA            | 297.1  | 55243.5   | 0.0 | 0.0 | 187.7 | 34979.0  | 5.6    | 989.0    | 193.4  | 35968.0  | 91211.5   |
| MB0364000 | PA POUSO ALEGRE            | 835.3  | 155807.5  | 0.0 | 0.0 | 298.9 | 55856.7  |        |          | 298.9  | 55856.7  | 211664.3  |
| MB0365000 | PA SANTA RITA              | 887.6  | 165381.7  | 0.0 | 0.0 | 63.6  | 11883.8  |        |          | 63.6   | 11883.8  | 177265.6  |
| MB0366000 | PA POUSO BONITO            | 873.5  | 162485.9  | 0.0 | 0.0 | 443.8 | 82907.8  | 99.9   | 18653.1  | 543.7  | 101560.9 | 264046.7  |
| MB0367000 | PA BOA SORTE II            | 572.4  | 106534.3  | 0.0 | 0.0 | 321.2 | 59895.1  | 9.6    | 1793.0   | 330.9  | 61688.1  | 168222.4  |
| MB0368000 | PA SANTA MARTA             | 899.1  | 166902.1  | 0.0 | 0.0 | 278.7 | 51969.7  | 38.1   | 7114.0   | 316.9  | 59083.7  | 225985.8  |
| MB0369000 | PA 8 DE MARÇO              | 539.3  | 100136.2  | 0.0 | 0.0 | 28.5  | 5326.0   | 955.6  | 178511.3 | 984.1  | 183837.3 | 283973.5  |
| MB0370000 | PA NOSSA SENHORA DA GUIA   | 1857.6 | 345662.2  | 0.0 | 0.0 | 190.2 | 35507.1  | 198.5  | 37029.2  | 388.6  | 72536.3  | 418198.5  |
| MB0371000 | PA VALE DO ARATAU          | 1350.8 | 251903.4  | 0.0 | 0.0 | 416.8 | 77863.4  | 241.3  | 45077.3  | 658.0  | 122940.7 | 374844.1  |
| MB0372000 | PA NOVA UNIÃO              | 737.8  | 137330.5  | 0.0 | 0.0 | 20.9  | 3914.1   | 638.5  | 119321.4 | 659.4  | 123235.5 | 260566.0  |
| MB0373000 | PA COCALÂNDIA II           | 1090.9 | 203729.8  | 0.0 | 0.0 | 556.2 | 103936.8 |        |          | 556.2  | 103936.8 | 307666.6  |
| MB0374000 | PA PARAUNA                 | 792.3  | 148030.4  | 0.0 | 0.0 | 89.2  | 16664.1  | 1097.1 | 205022.9 | 1186.2 | 221687.0 | 369717.4  |
| MB0375000 | PA REUNIDAS                | 2486.1 | 463973.8  | 0.0 | 0.0 | 650.6 | 121568.0 | 1176.0 | 219758.7 | 1826.6 | 341326.7 | 805300.5  |
| MB0376000 | PA PALMEIRA JUSSARA        | 845.1  | 157057.0  | 0.0 | 0.0 | 117.0 | 21813.5  |        |          | 117.0  | 21813.5  | 178870.6  |
| MB0377000 | PA CONSPEL                 | 807.9  | 149508.4  | 0.0 | 0.0 | 241.5 | 44695.2  |        |          | 241.5  | 44695.2  | 194203.6  |
| MB0378000 | PA JOÃO LANARI DO VAL      | 3986.3 | 383668.9  | 0.0 | 0.0 | 680.0 | 45676.3  |        |          | 680.0  | 45676.3  | 429345.2  |
| MB0379000 | PA CABANOS                 | 2734.5 | 462164.5  | 0.0 | 0.0 | 175.6 | 28674.1  |        |          | 175.6  | 28674.1  | 490838.6  |
| MB0380000 | PA BELO VALE               | 1138.4 | 211905.2  | 0.0 | 0.0 | 157.4 | 29393.1  |        |          | 157.4  | 29393.1  | 241298.3  |
| MB0381000 | PA CASTANHAL ALMESCÃO      | 3906.1 | 730016.0  | 0.0 | 0.0 | 699.5 | 130730.0 |        |          | 699.5  | 130730.0 | 860746.0  |
| MB0382000 | PA NOVO PROJETO            | 0.0    | 0.0       | 0.0 | 0.0 |       |          | 1716.1 | 31500.3  | 1716.1 | 31500.3  | 31500.3   |
| MB0384000 | PA MATA AZUL II            | 1965.5 | 320319.5  | 0.0 | 0.0 | 132.8 | 21649.9  |        |          | 132.8  | 21649.9  | 341969.3  |

|           |                                 |        |           |     |     |        |          |        |          |        |          |           |
|-----------|---------------------------------|--------|-----------|-----|-----|--------|----------|--------|----------|--------|----------|-----------|
| MB0385000 | PA IRMÃ DULCE<br>PA AQUARIUS    | 4182.0 | 702115.4  | 0.0 | 0.0 | 175.8  | 29511.8  |        |          | 175.8  | 29511.8  | 731627.3  |
| MB0387000 | CRUZEIRO DO SUL<br>PA BELO      | 2720.9 | 506516.7  | 0.0 | 0.0 | 287.1  | 53609.0  | 1053.5 | 196864.1 | 1340.6 | 250473.1 | 756989.8  |
| MB0388000 | HORIZONTE II<br>PA PEDRA DE     | 1854.7 | 344070.6  | 0.0 | 0.0 | 529.6  | 98907.4  |        |          | 529.6  | 98907.4  | 442978.0  |
| MB0389000 | AMOLAR<br>PA ZUMBI DOS          | 703.2  | 130129.2  | 0.0 | 0.0 | 51.7   | 9576.3   |        |          | 51.7   | 9576.3   | 139705.5  |
| MB0390000 | PALMARES                        | 2039.9 | 379982.3  | 0.0 | 0.0 | 1170.7 | 218664.9 | 565.9  | 105750.0 | 1736.6 | 324414.9 | 704397.2  |
| MB0391000 | PA SOL NASCENTE<br>PA GABRIEL   | 1174.7 | 217398.1  | 0.0 | 0.0 | 39.4   | 7283.8   |        |          | 39.4   | 7283.8   | 224681.9  |
| MB0392000 | PIMENTA                         | 2562.0 | 474803.8  | 0.0 | 0.0 | 599.3  | 111727.8 |        |          | 599.3  | 111727.8 | 586531.5  |
| MB0394000 | PA JOÃO VAZ                     | 2510.1 | 464456.0  | 0.0 | 0.0 | 138.0  | 25432.5  | 123.6  | 22880.9  | 261.7  | 48313.4  | 512769.4  |
| MB0395000 | PA LIBERDADE                    | 4839.5 | 903145.4  | 0.0 | 0.0 | 768.7  | 143654.6 |        |          | 768.7  | 143654.6 | 1046800.0 |
| MB0396000 | PA BOM JESUS                    | 1445.9 | 236316.1  | 0.0 | 0.0 | 76.5   | 12474.3  |        |          | 76.5   | 12474.3  | 248790.4  |
| MB0397000 | PA SANTA LUCIA                  | 1172.7 | 218957.3  | 0.0 | 0.0 | 79.0   | 14768.6  |        |          | 79.0   | 14768.6  | 233726.0  |
| MB0398000 | PA ESTRELA DALVA<br>PA GROTA DO | 1488.4 | 278098.3  | 0.0 | 0.0 | 1259.3 | 235349.8 |        |          | 1259.3 | 235349.8 | 513448.1  |
| MB0401000 | SEVERINO                        | 746.6  | 138326.1  | 0.0 | 0.0 | 16.4   | 3029.5   |        |          | 16.4   | 3029.5   | 141355.6  |
| MB0402000 | PA TALISMÃ                      | 668.9  | 124972.7  | 0.0 | 0.0 | 317.6  | 59348.7  |        |          | 317.6  | 59348.7  | 184321.4  |
| MB0404000 | PA CANUDOS                      | 2567.0 | 456166.2  | 0.0 | 0.0 | 174.6  | 28630.4  |        |          | 174.6  | 28630.4  | 484796.6  |
| MB0405000 | PA TARUMÃ                       | 4023.6 | 747282.9  | 0.0 | 0.0 | 381.4  | 70949.7  |        |          | 381.4  | 70949.7  | 818232.6  |
| MB0406000 | PA ESPERANÇA                    | 2028.6 | 346425.1  | 0.0 | 0.0 | 235.5  | 38633.2  |        |          | 235.5  | 38633.2  | 385058.3  |
| MB0407000 | PA LIMEIRA                      | 1205.2 | 223729.9  | 0.0 | 0.0 | 137.7  | 25602.2  |        |          | 137.7  | 25602.2  | 249332.1  |
| MB0408000 | PA ANTARES                      | 5577.5 | 1038588.6 | 0.0 | 0.0 | 1454.9 | 271861.8 |        |          | 1454.9 | 271861.8 | 1310450.4 |
| MB0409000 | PA PARAGOMINAS                  | 1553.3 | 259719.3  | 0.0 | 0.0 | 47.0   | 7716.7   |        |          | 47.0   | 7716.7   | 267436.0  |
| MB0411000 | PA CARUMBÉ<br>PA UNIÃO DO       | 2715.9 | 447244.9  | 0.0 | 0.0 | 136.4  | 22226.9  |        |          | 136.4  | 22226.9  | 469471.7  |
| MB0412000 | ANGICO                          | 2619.5 | 427542.0  | 0.0 | 0.0 | 183.0  | 29829.0  |        |          | 183.0  | 29829.0  | 457371.0  |
| MB0413000 | PA MUTUÃ                        | 3267.9 | 534215.1  | 0.0 | 0.0 | 331.4  | 54342.5  |        |          | 331.4  | 54342.5  | 588557.7  |
| MB0416000 | PA COCALINHO                    | 0.0    | 0.0       | 0.0 | 0.0 |        |          | 1373.8 | 12941.5  | 1373.8 | 12941.5  | 12941.5   |
| MB0417000 | PA RAINHA DA PAZ                | 3011.1 | 562185.0  | 0.0 | 0.0 | 541.6  | 101190.1 | 369.8  | 69117.2  | 911.5  | 170307.3 | 732492.3  |
| MB0418000 | PA GAVIÃO                       | 8060.7 | 1502350.7 | 0.0 | 0.0 | 2009.6 | 375428.7 | 404.0  | 75467.2  | 2413.6 | 450896.0 | 1953246.6 |
| MB0419000 | PA MANTENHA<br>PA CACHOEIRA     | 1068.9 | 199437.6  | 0.0 | 0.0 | 101.7  | 19007.0  |        |          | 101.7  | 19007.0  | 218444.6  |
| MB0420000 | PRETA II                        | 5349.7 | 998727.5  | 0.0 | 0.0 | 1775.5 | 331740.8 |        |          | 1775.5 | 331740.8 | 1330468.3 |

|           |                                   |         |           |     |     |        |           |        |          |        |           |           |          |          |
|-----------|-----------------------------------|---------|-----------|-----|-----|--------|-----------|--------|----------|--------|-----------|-----------|----------|----------|
| MB0422000 | PA PADRE JOSIMO<br>TAVARES II     | 845.3   | 157304.5  | 0.0 | 0.0 | 174.6  | 32611.8   |        |          | 174.6  | 32611.8   | 189916.4  | 32.9     |          |
| MB0423000 | PA REINO<br>ENCANTADO             | 1205.9  | 224624.7  | 0.0 | 0.0 | 83.9   | 15681.6   | 1037.1 | 193756.0 | 1121.0 | 209437.6  | 434062.3  |          |          |
| MB0424000 | PA DOMINGOS<br>OLIVEIRA BEZERRA   | 4930.1  | 808195.8  | 0.0 | 0.0 | 1896.4 | 312816.7  |        |          | 1896.4 | 312816.7  | 1121012.5 |          |          |
| MB0425000 | PA SÃO SEBASTIÃO<br>DO CRISTALINO | 3200.6  | 521926.4  | 0.0 | 0.0 | 1583.8 | 258113.9  |        |          | 1583.8 | 258113.9  | 780040.3  |          |          |
| MB0426000 | PA SÃO PEDRO II                   | 3197.8  | 521144.4  | 0.0 | 0.0 | 2309.5 | 376373.5  |        |          | 2309.5 | 376373.5  | 897517.9  |          |          |
| MB0427000 | PA PIONEIRA<br>PA RIBEIRÃO DAS    | 1262.1  | 234584.4  | 0.0 | 0.0 | 419.6  | 78272.6   | 354.2  | 65957.2  | 773.7  | 144229.8  | 378814.2  |          |          |
| MB0428000 | PEDRAS                            | 1317.0  | 245597.9  | 0.0 | 0.0 | 428.6  | 80052.9   | 270.9  | 50609.4  | 699.5  | 130662.3  | 376260.2  |          |          |
| MB0430000 | PA ARIZONA                        | 11008.3 | 1826941.8 | 0.0 | 0.0 | 2300.6 | 387538.5  |        |          | 2300.6 | 387538.5  | 2214480.3 | 57.8     |          |
| MB0431000 | PA CONSOLAÇÃO                     | 0.0     | 0.0       | 0.0 | 0.0 |        |           | 4823.3 | 233626.0 | 4823.3 | 233626.0  | 233626.0  |          |          |
| MB0432000 | PA PANORAMA                       | 3452.1  | 572398.4  | 0.0 | 0.0 | 130.1  | 21224.7   |        |          | 130.1  | 21224.7   | 593623.1  |          |          |
| MB0433000 | PA CRISTO VIVE                    | 4131.2  | 673495.3  | 0.0 | 0.0 | 2545.5 | 414837.1  | 85.4   | 13914.9  | 2630.9 | 428752.0  | 1102247.3 |          |          |
| MB0434000 | PA SERRA GRANDE<br>PA NOVA        | 3831.6  | 625174.8  | 0.0 | 0.0 | 2066.8 | 336822.4  |        |          | 2066.8 | 336822.4  | 961997.1  |          |          |
| MB0435000 | INDEPENDÊNCIA                     | 2955.3  | 482571.5  | 0.0 | 0.0 | 3105.5 | 506114.4  |        |          | 3105.5 | 506114.4  | 988686.0  |          |          |
| MB0436000 | PA ITAMARATY                      | 5700.5  | 929162.5  | 0.0 | 0.0 | 1910.5 | 311346.9  |        |          | 1910.5 | 311346.9  | 1240509.4 |          |          |
| MB0437000 | PA ÁGUA BOA                       | 704.4   | 115204.5  | 0.0 | 0.0 |        |           |        |          | 0.0    | 0.0       | 115204.5  |          |          |
| MB0438000 | PA SUMAUMA II                     | 3277.2  | 612197.6  | 0.0 | 0.0 | 1796.4 | 335674.5  |        |          | 1796.4 | 335674.5  | 947872.0  | 39.1     |          |
| MB0439000 | PA CAMPOS VERDES                  | 69.4    | 760.8     | 0.0 | 0.0 | 97.7   | 8223.6    | 4460.5 | 46231.2  | 4558.2 | 54454.8   | 55215.6   |          |          |
| MB0440000 | PA BOM FUTURO                     | 804.3   | 149870.1  | 0.0 | 0.0 | 2123.5 | 396308.7  |        |          | 9.3    | 1726.5    | 2132.7    | 398035.2 | 547905.3 |
| MB0441000 | PA SUNIL                          | 1329.2  | 248413.9  | 0.0 | 0.0 | 1027.2 | 191968.8  |        |          | 1.3    | 241.6     | 1028.5    | 192210.4 | 440624.3 |
| MB0442000 | PA JORDÃO                         | 1585.5  | 296310.6  | 0.0 | 0.0 | 1444.2 | 269898.2  |        |          | 1444.2 | 269898.2  | 566208.8  |          |          |
| MB0443000 | PA CARAJÁS                        | 2295.5  | 429014.7  | 0.0 | 0.0 | 2802.9 | 523841.6  |        |          | 2802.9 | 523841.6  | 952856.2  |          |          |
| MB0444000 | PA VIDA NOVA<br>PA BARRACA DO     | 1962.0  | 365611.4  | 0.0 | 0.0 | 1091.3 | 203813.5  | 0.0    | 1.3      | 1091.3 | 203814.8  | 569426.2  |          |          |
| MB0445000 | MEIO                              | 2857.4  | 530796.8  | 0.0 | 0.0 | 1520.2 | 283948.1  |        |          | 1520.2 | 283948.1  | 814744.9  |          |          |
| MB0446000 | PA UXI                            | 5328.3  | 990516.7  | 0.0 | 0.0 | 2625.5 | 490290.6  |        |          | 2625.5 | 490290.6  | 1480807.3 |          |          |
| MB0448000 | PA PEDRA BRANCA                   | 13488.7 | 2508608.1 | 0.0 | 0.0 | 5162.1 | 964454.1  |        |          | 5162.1 | 964454.1  | 3473062.3 |          |          |
| MB0450000 | PA RIO BANDEIRA                   | 2026.7  | 377131.0  | 0.0 | 0.0 | 8800.5 | 1643515.6 | 320.7  | 59924.5  | 9121.3 | 1703440.2 | 2080571.2 |          |          |
| MB0451000 | PA SANTIAGO<br>PA NOVA            | 1639.8  | 306470.0  | 0.0 | 0.0 | 1765.0 | 329867.7  | 313.9  | 58671.1  | 2079.0 | 388538.8  | 695008.8  |          |          |
| MB0452000 | DESCOBERTA                        | 3160.5  | 583957.4  | 0.0 | 0.0 | 93.8   | 17276.5   |        |          | 93.8   | 17276.5   | 601233.9  |          |          |

|           |                                  |         |           |     |     |         |           |        |          |          |           |            |           |
|-----------|----------------------------------|---------|-----------|-----|-----|---------|-----------|--------|----------|----------|-----------|------------|-----------|
| MB0453000 | PA LIMPEZA                       | 3690.9  | 683043.9  | 0.0 | 0.0 | 83.5    | 15446.8   |        |          | 83.5     | 15446.8   | 698490.7   |           |
| MB0454000 | PA MAL ARRUMADO                  | 949.5   | 175711.3  | 0.0 | 0.0 | 40.8    | 7545.2    |        |          | 40.8     | 7545.2    | 183256.4   |           |
| MB0455000 | PA JOSÉ INOCÊNCIO NERES          | 65.5    | 8113.4    | 0.0 | 0.0 | 148.1   | 12155.2   | 3788.6 | 48084.6  | 3936.7   | 60239.8   | 68353.2    |           |
| MB0456000 | PA ÁGUA BRANCA                   | 2328.4  | 434471.9  | 0.0 | 0.0 | 905.1   | 169103.6  |        |          | 905.1    | 169103.6  | 603575.5   |           |
| MB0458000 | PA COLÔNIA PODEROSA              | 5436.1  | 886028.3  | 0.0 | 0.0 | 1627.2  | 265185.8  | 422.6  | 68872.1  | 2049.8   | 334057.9  | 1220086.2  |           |
| MB0459000 | PA OESTE                         | 4369.9  | 815144.7  | 0.0 | 0.0 | 1450.6  | 271061.9  |        |          | 1450.6   | 271061.9  | 1086206.7  |           |
| MB0460000 | PA RIO CURURUÍ                   | 5865.0  | 1096112.3 | 0.0 | 0.0 | 22976.8 | 4294126.4 |        | 2570.6   | 480426.9 | 25547.4   | 4774553.3  | 5870665.6 |
| MB0461000 | PA PETRONÍLIO ALVES BATISTA      | 5609.1  | 914122.6  | 0.0 | 0.0 | 8943.2  | 1457479.2 |        |          | 8943.2   | 1457479.2 | 2371601.8  |           |
| MB0462000 | PA NOVA JERUZALÉM                | 577.1   | 106791.5  | 0.0 | 0.0 |         |           |        |          | 0.0      | 0.0       | 106791.5   |           |
| MB0463000 | PA SÃO VICENTE                   | 2494.9  | 465474.9  | 0.0 | 0.0 | 250.5   | 46819.8   |        | 2800.8   | 523422.5 | 3051.3    | 570242.3   | 1035717.2 |
| MB0467000 | PA HAMILTON CORDEIRO CELSO       | 9429.4  | 1539635.2 | 0.0 | 0.0 | 4454.3  | 729176.3  | 55.8   | 9100.9   | 4510.1   | 738277.2  | 2277912.4  |           |
| MB0469000 | PA CENTRO NOVO                   | 2545.2  | 471010.7  | 0.0 | 0.0 | 164.2   | 30383.9   |        |          | 164.2    | 30383.9   | 501394.6   |           |
| MB0472000 | PA BACURIZINHO                   | 1133.7  | 211885.6  | 0.0 | 0.0 | 242.0   | 45233.0   |        |          | 242.0    | 45233.0   | 257118.6   |           |
| MB0473000 | PA SOL NASCENTE                  | 1494.8  | 277727.3  | 0.0 | 0.0 | 1434.7  | 267336.3  |        | 33.7     | 6274.2   | 1468.4    | 273610.5   | 551337.7  |
| MB0474000 | PA CLÉZINHO                      | 3413.8  | 634314.1  | 0.0 | 0.0 | 1251.0  | 233735.4  |        |          | 1251.0   | 233735.4  | 868049.4   |           |
| MB0475000 | PA NOSSA SENHORA APARECIDA II    | 95.2    | 2544.5    | 0.0 | 0.0 | 117.0   | 8462.0    | 1925.9 | 47675.4  | 2042.9   | 56137.4   | 58681.9    |           |
| MB0476000 | PA TIRADENTES                    | 199.3   | 27481.9   | 0.0 | 0.0 | 73.9    | 11783.1   | 4032.9 | 69188.2  | 4106.8   | 80971.3   | 108453.2   |           |
| MB0477000 | PA ARARANDEUA                    | 13137.9 | 2444125.0 | 0.0 | 0.0 | 13284.7 | 2482416.3 |        | 968.0    | 180870.9 | 14252.7   | 2663287.2  | 5107412.2 |
| MB0478000 | PA IRMÃ DOROTY PA COSME E DAMIÃO | 361.1   | 67483.9   | 0.0 | 0.0 | 2603.9  | 486646.5  |        | 127.8    | 23876.6  | 2731.7    | 510523.1   | 578007.0  |
| MB0480000 |                                  | 1435.1  | 243241.4  | 0.0 | 0.0 | 112.2   | 18302.1   |        |          | 112.2    | 18302.1   | 261543.4   |           |
| MB0481000 | PA SANTA CECILIA                 | 426.3   | 79252.1   | 0.0 | 0.0 | 507.7   | 94653.4   |        |          | 507.7    | 94653.4   | 173905.5   |           |
| MB0483000 | PA CENTRO NOVO II                | 3514.0  | 650308.7  | 0.0 | 0.0 | 100.0   | 18500.8   |        |          | 100.0    | 18500.8   | 668809.5   |           |
| MB0484000 | PA SANTA ELIZA                   | 3344.7  | 556289.3  | 0.0 | 0.0 | 1.4     | 234.8     |        |          | 1.4      | 234.8     | 556524.1   |           |
| MB0485000 | PA MORADA NOVA                   | 9421.4  | 1754459.0 | 0.0 | 0.0 | 629.9   | 117670.8  |        | 4760.9   | 889459.0 | 5390.8    | 1007129.8  | 2761588.8 |
| MB0486000 | PA MORADA NOVA II                | 6006.6  | 1119639.0 | 0.0 | 0.0 | 817.7   | 152744.8  |        | 4622.3   | 863666.6 | 5440.0    | 1016411.4  | 2136050.4 |
| MB0489000 | PA DEUS É PAZ                    | 6921.1  | 1122851.3 | 0.0 | 0.0 | 848.8   | 138055.7  |        |          | 848.8    | 138055.7  | 1260907.1  |           |
| MB0491000 | PA POMBAL                        | 36892.9 | 6161669.1 | 0.0 | 0.0 | 49355.8 | 8373677.3 | 4320.9 | 550158.8 | 53676.7  | 8923836.1 | 15085505.2 | 242.0     |
| MB0492000 | PA FELICIDADE                    | 5003.6  | 934817.2  | 0.0 | 0.0 | 282.1   | 52719.3   |        |          | 282.1    | 52719.3   | 987536.5   |           |

|           |                                                |         |           |     |     |        |           |        |         |        |          |           |           |           |
|-----------|------------------------------------------------|---------|-----------|-----|-----|--------|-----------|--------|---------|--------|----------|-----------|-----------|-----------|
| MB0493000 | PA I DE MAIO                                   | 2380.8  | 444944.3  | 0.0 | 0.0 | 490.0  | 91576.2   |        |         | 490.0  | 91576.2  | 536520.5  |           |           |
| MB0497000 | PA RECANTO DA IARA                             | 218.4   | 10187.0   | 0.0 | 0.0 | 159.0  | 25387.9   | 1393.0 | 24748.9 |        | 1552.0   | 50136.7   | 60323.8   |           |
| MB0499000 | PA ANTONIO NONATO                              | 2338.1  | 435601.1  | 0.0 | 0.0 | 2182.8 | 407765.9  |        |         | 53.1   | 9921.2   | 2235.9    | 417687.1  | 853288.2  |
| MB0500000 | PA UNIÃO DA VITÓRIA                            | 599.7   | 111512.4  | 0.0 | 0.0 | 412.2  | 77012.8   |        |         |        | 412.2    | 77012.8   | 188525.2  |           |
| MB0503000 | PA PROGRESSO                                   | 1361.6  | 225580.0  | 0.0 | 0.0 | 97.1   | 15867.0   |        |         |        | 97.1     | 15867.0   | 241447.0  |           |
| MB0504000 | PA BARRA MANSÁ                                 | 7420.0  | 1386728.4 | 0.0 | 0.0 | 8302.1 | 1551579.5 |        |         | 0.0    | 2.0      | 8302.1    | 1551581.5 | 2938309.9 |
| MB0505000 | PA 26 DE MARÇO                                 | 8222.4  | 1524279.8 | 0.0 | 0.0 | 1959.2 | 365262.6  |        |         |        | 1959.2   | 365262.6  | 1889542.5 |           |
| MB0506000 | PA MAMUI                                       | 1375.4  | 255873.7  | 0.0 | 0.0 | 628.7  | 117371.9  |        |         |        | 628.7    | 117371.9  | 373245.7  |           |
| MB0508000 | PA UNIAO BATENTE                               | 3422.8  | 571221.1  | 0.0 | 0.0 | 507.8  | 82818.3   |        |         |        | 507.8    | 82818.3   | 654039.4  |           |
| MB0509000 | PA PRATA PE BACABAL                            | 1615.6  | 298977.0  | 0.0 | 0.0 | 1172.6 | 217007.9  |        |         |        | 1172.6   | 217007.9  | 515984.9  |           |
| MB0511000 | PA GRANDE                                      | 2214.3  | 410035.0  | 0.0 | 0.0 | 199.4  | 37076.6   |        |         |        | 199.4    | 37076.6   | 447111.6  |           |
| MB0513000 | PA BAGUA                                       | 4823.5  | 847169.8  | 0.0 | 0.0 | 699.0  | 114045.9  |        |         |        | 699.0    | 114045.9  | 961215.7  |           |
| MB0514000 | PA AGUAS CLARAS                                | 0.0     | 0.0       | 0.0 | 0.0 |        |           | 1453.0 | 67154.0 |        | 1453.0   | 67154.0   | 67154.0   |           |
| MB0515000 | PA SANTA MARIANA                               | 1586.4  | 263606.5  | 0.0 | 0.0 | 242.5  | 39590.0   |        |         |        | 242.5    | 39590.0   | 303196.5  |           |
| MB0516000 | PA SANTA PAULA                                 | 2794.7  | 519918.4  | 0.0 | 0.0 | 1836.7 | 343129.3  |        |         | 1126.3 | 210454.0 | 2963.0    | 553583.4  | 1073501.8 |
| MB0517000 | PA SAO SEBASTIAO                               | 1184.5  | 220013.2  | 0.0 | 0.0 | 1232.2 | 230234.9  |        |         | 409.4  | 76488.3  | 1641.6    | 306723.3  | 526736.5  |
| MB0518000 | PA PEDRO ALCANTARA                             | 4625.7  | 762234.5  | 0.0 | 0.0 | 587.6  | 95759.0   |        |         |        | 587.6    | 95759.0   | 857993.5  |           |
| MB0519000 | PA BELAUTO                                     | 16686.7 | 3089354.0 | 0.0 | 0.0 | 8540.0 | 1594842.9 |        |         |        | 8540.0   | 1594842.9 | 4684196.9 |           |
| MB0520000 | PA RAINHA II PA SALVADOR                       | 1946.8  | 361726.2  | 0.0 | 0.0 | 662.9  | 123815.8  |        |         | 0.0    | 4.1      | 662.9     | 123819.9  | 485546.1  |
| MB0520001 | ALLENDE PIRATININGA                            | 2396.4  | 444824.5  | 0.0 | 0.0 | 4448.3 | 829461.9  |        |         | 420.1  | 78333.3  | 4868.4    | 907795.1  | 1352619.6 |
| MB0524000 | PA PIROSCA PA PEDRO LAURINDO DA SILVA          | 4039.4  | 640331.4  | 0.0 | 0.0 | 202.9  | 33062.9   |        |         |        | 202.9    | 33062.9   | 673394.3  |           |
| MB0525000 | PA MIRITIPITANGA PA MANOEL CRESCÊNCIO DE SOUZA | 2086.1  | 388342.0  | 0.0 | 0.0 | 1396.7 | 260819.8  |        |         |        | 1396.7   | 260819.8  | 649161.8  |           |
| PA0006000 | PA COLONIA REUNIDAS                            | 3189.5  | 591355.4  | 0.0 | 0.0 | 175.5  | 32587.1   |        |         | 21.0   | 3906.1   | 196.6     | 36493.2   | 627848.6  |
| PA0016000 | PA CONCREIN                                    | 18322.2 | 3390700.0 | 0.0 | 0.0 | 524.4  | 97045.9   |        |         | 22.4   | 4147.2   | 546.8     | 101193.0  | 3491893.0 |
| PA0017000 |                                                | 4161.0  | 771105.9  | 0.0 | 0.0 | 197.8  | 36822.8   |        |         | 3.6    | 667.4    | 201.4     | 37490.2   | 808596.1  |
| PA0019000 |                                                | 4004.8  | 743147.1  | 0.0 | 0.0 | 67.5   | 12621.2   |        |         | 11.5   | 2154.0   | 79.1      | 14775.3   | 757922.3  |

|           |                               |          |            |     |     |         |           |      |         |            |         |            |            |           |
|-----------|-------------------------------|----------|------------|-----|-----|---------|-----------|------|---------|------------|---------|------------|------------|-----------|
| PA0027000 | PA UNIÃO I                    | 13490.9  | 2496633.3  | 0.0 | 0.0 | 141.3   | 26149.2   |      | 2.9     | 533.8      | 144.2   | 26683.0    | 2523316.3  |           |
| PA0028000 | PA SAO PEDRO                  | 9809.8   | 1815395.5  | 0.0 | 0.0 | 0.7     | 130.9     |      |         |            | 0.7     | 130.9      | 1815526.4  |           |
| PA0030000 | PA BENEDITO ALVES<br>BANDEIRA | 6097.8   | 1128514.0  | 0.0 | 0.0 | 1911.7  | 353788.3  |      | 295.8   | 54742.7    | 2207.6  | 408530.9   | 1537045.0  |           |
| PA0055000 | PA BARCELONA                  | 1619.3   | 299663.1   | 0.0 | 0.0 |         |           |      |         |            | 0.0     | 0.0        | 299663.1   |           |
| PA0063000 | PA<br>PARAGOMINAS/FAIS<br>CÃO | 11693.1  | 2151265.7  | 0.0 | 0.0 | 1117.9  | 207340.5  |      | 145.4   | 26837.2    | 1263.2  | 234177.6   | 2385443.3  |           |
| PA0066000 | PA SANTA MARIA I E<br>II      | 2323.6   | 425016.2   | 0.0 | 0.0 | 2003.3  | 356903.4  | 74.7 | 13688.6 | 50.5       | 8922.2  | 2128.4     | 379514.2   | 804530.4  |
| PA0068000 | PA JOAO BATISTA               | 3193.9   | 591059.7   | 0.0 | 0.0 | 1.1     | 199.9     |      |         |            | 1.1     | 199.9      | 591259.6   |           |
| PA0069000 | PA SURUBJU                    | 3431.4   | 602413.1   | 0.0 | 0.0 | 739.0   | 122241.3  |      | 184.6   | 30515.1    | 923.6   | 152756.4   | 755169.5   |           |
| PA0080000 | PA BOM JESUS                  | 7597.3   | 1405959.3  | 0.0 | 0.0 | 578.0   | 106972.2  |      | 19.7    | 3651.5     | 597.8   | 110623.8   | 1516583.1  |           |
| PA0081000 | PA CIDAPAR 1-<br>PARTE        | 148317.7 | 27469021.3 | 0.0 | 0.0 | 39098.1 | 7269454.2 |      | 69010.2 | 12823592.9 | 3       | 20093047.1 | 47562068.4 | 573.0     |
| PA0082000 | PA CIDAPAR 3-<br>PARTE        | 44584.7  | 8244621.8  | 0.0 | 0.0 | 3083.0  | 569272.7  |      | 5990.2  | 1110176.2  | 9073.2  | 1679448.9  | 9924070.7  | 166.3     |
| PA0085000 | PA ITABOCAL                   | 39337.2  | 7279751.1  | 0.0 | 0.0 | 223.4   | 41349.0   |      | 1668.3  | 308736.7   | 1891.7  | 350085.7   | 7629836.8  |           |
| PA0088000 | PA CIDAPAR 2-<br>PARTE        | 19067.6  | 3530129.2  | 0.0 | 0.0 | 444.9   | 82405.6   |      | 2158.9  | 400365.5   | 2603.8  | 482771.1   | 4012900.3  |           |
| PA0097000 | PA TROPICÁLIA                 | 3098.0   | 574036.7   | 0.0 | 0.0 | 1152.0  | 214314.0  |      | 146.4   | 27227.2    | 1298.4  | 241541.3   | 815577.9   |           |
| PA0105000 | PA MINAS PARÁ                 | 9835.9   | 1820576.8  | 0.0 | 0.0 | 424.2   | 78593.4   |      | 49.0    | 9089.4     | 473.1   | 87682.8    | 1908259.5  |           |
| PA0150000 | PA ARAPUA SIMEIRA             | 58073.9  | 10758768.6 | 0.0 | 0.0 | 2255.4  | 418703.6  |      | 8771.5  | 1630567.4  | 11026.9 | 2049270.9  | 12808039.5 |           |
| PA0154000 | PA CAMAPUÁ                    | 5541.7   | 1026682.8  | 0.0 | 0.0 | 1443.6  | 269004.4  |      | 350.0   | 65249.5    | 1793.6  | 334253.8   | 1360936.6  |           |
| PA0163000 | PA MARAVILHA                  | 7291.1   | 1351470.3  | 0.0 | 0.0 | 1031.1  | 192016.0  | 50.8 | 9462.5  | 60.7       | 11308.4 | 1142.5     | 212786.8   | 1564257.2 |
| PA0164000 | PA FLORESTA<br>GURUPI I       | 32600.7  | 5832186.4  | 0.0 | 0.0 | 6528.7  | 1152360.8 |      | 2965.0  | 520623.8   | 9493.7  | 1672984.7  | 7505171.1  | 0.7       |
| PA0165000 | PA VALE DO<br>BACABA          | 13822.9  | 2558471.4  | 0.0 | 0.0 | 93.1    | 17229.5   |      | 0.0     | 0.5        | 93.1    | 17229.9    | 2575701.3  |           |
| PA0166000 | PA DEL REY                    | 7278.3   | 1348037.0  | 0.0 | 0.0 | 1293.7  | 240379.1  |      | 136.9   | 25456.6    | 1430.6  | 265835.7   | 1613872.7  |           |
| PA0167000 | PA SERRA NEGRA                | 2435.2   | 450849.9   | 0.0 | 0.0 | 80.0    | 14809.2   |      | 8.0     | 1496.9     | 88.0    | 16306.1    | 467156.0   |           |
| PA0168000 | PA CANDIRU                    | 9067.3   | 1677995.6  | 0.0 | 0.0 | 9.4     | 1748.1    |      |         |            | 9.4     | 1748.1     | 1679743.7  |           |
| PA0171000 | PA ÁGUIA                      | 7469.8   | 1389673.4  | 0.0 | 0.0 | 574.4   | 107316.7  |      | 436.7   | 81588.0    | 1011.1  | 188904.7   | 1578578.1  |           |
| PA0179000 | PA PARAGONORTE                | 28414.9  | 5265494.7  | 0.0 | 0.0 | 2621.4  | 487925.3  |      | 1414.5  | 263577.2   | 4036.0  | 751502.6   | 6016997.2  |           |
| PA0180000 | PA RIO JABUTI                 | 15200.5  | 2815879.2  | 0.0 | 0.0 | 669.3   | 123151.8  |      | 21.6    | 3985.2     | 690.9   | 127136.9   | 2943016.2  |           |
| PA0193000 | PA PARANOIA                   | 14626.3  | 2712031.3  | 0.0 | 0.0 | 1672.8  | 311517.1  |      | 1164.6  | 216923.9   | 2837.5  | 528441.1   | 3240472.4  |           |

|           |                                               |         |           |     |     |        |           |        |          |       |          |        |           |           |      |
|-----------|-----------------------------------------------|---------|-----------|-----|-----|--------|-----------|--------|----------|-------|----------|--------|-----------|-----------|------|
| PA0194000 | PA ÁGUA AZUL                                  | 3193.4  | 592095.3  | 0.0 | 0.0 | 97.5   | 18126.3   |        |          | 832.1 | 155080.4 | 929.6  | 173206.7  | 765302.0  |      |
| PA0210000 | PA CALMARIA I                                 | 5139.4  | 958394.0  | 0.0 | 0.0 | 3917.1 | 730465.5  |        |          | 236.0 | 44016.1  | 4153.2 | 774481.7  | 1732875.7 |      |
| PA0211000 | PA CALMARIA II                                | 7248.7  | 1348540.8 | 0.0 | 0.0 | 3764.1 | 701111.9  | 1466.8 | 271683.8 | 395.4 | 73664.9  | 5626.3 | 1046460.7 | 2395001.5 |      |
| PA0212000 | PA OLHO D AGUA I<br>PA LUIZ LOPES<br>SOBRINHO | 5728.5  | 1060792.2 | 0.0 | 0.0 | 1541.2 | 285695.6  | 2352.4 | 435672.1 | 27.7  | 5129.2   | 3921.3 | 726496.9  | 1787289.1 |      |
| PA0224000 |                                               | 3447.2  | 637939.4  | 0.0 | 0.0 | 982.7  | 181851.5  |        |          | 92.1  | 17052.5  | 1074.8 | 198904.0  | 836843.4  |      |
| PA0225000 | PA CRISTAL                                    | 1362.7  | 252174.3  | 0.0 | 0.0 | 22.6   | 4183.9    |        |          |       |          | 22.6   | 4183.9    | 256358.2  |      |
| PA0229000 | PA ENALCO                                     | 10058.1 | 1871099.3 | 0.0 | 0.0 | 1208.7 | 225193.7  |        |          | 7.5   | 1402.3   | 1216.3 | 226595.9  | 2097695.2 | 0.4  |
| PA0230000 | PA IMPERASSU                                  | 1910.1  | 353484.8  | 0.0 | 0.0 | 17.8   | 3295.6    |        |          |       |          | 17.8   | 3295.6    | 356780.4  |      |
| PA0248000 | PA CUPIÚBA                                    | 1350.6  | 249945.8  | 0.0 | 0.0 |        |           |        |          |       |          | 0.0    | 0.0       | 249945.8  |      |
| PA0250000 | PA JOÃO BATISTA II                            | 1825.7  | 333881.7  | 0.0 | 0.0 | 289.7  | 51941.4   |        |          |       |          | 289.7  | 51941.4   | 385823.1  |      |
| PA0251000 | PA CANAÃ                                      | 3805.3  | 704459.5  | 0.0 | 0.0 | 116.0  | 21464.0   |        |          |       |          | 116.0  | 21464.0   | 725923.5  |      |
| PA0253000 | PA TRÊS IRMÃOS                                | 2411.7  | 448779.0  | 0.0 | 0.0 | 1003.5 | 187050.8  |        |          | 57.3  | 10685.5  | 1060.9 | 197736.3  | 646515.2  |      |
| PA0254000 | PA TIMBORANA                                  | 3109.2  | 577486.9  | 0.0 | 0.0 | 133.0  | 24775.1   |        |          |       |          | 133.0  | 24775.1   | 602262.0  |      |
| PA0255000 | PA RIO<br>ACAMPAMENTO<br>PA NOVA<br>CONQUISTA | 5900.8  | 1099819.5 | 0.0 | 0.0 | 578.5  | 108093.0  |        |          |       |          | 578.5  | 108093.0  | 1207912.5 |      |
| PA0256000 |                                               | 1342.5  | 249163.1  | 0.0 | 0.0 | 55.6   | 10372.0   |        |          |       |          | 55.6   | 10372.0   | 259535.2  |      |
| PA0257000 | PA OLHO D ÁGUA II                             | 2292.7  | 427543.7  | 0.0 | 0.0 | 4769.7 | 889449.1  |        |          | 980.7 | 182871.8 | 5750.3 | 1072320.9 | 1499864.6 | 63.5 |
| PA0258000 | PA RIO DAS CRUZES                             | 3375.2  | 630096.6  | 0.0 | 0.0 | 421.2  | 78721.7   |        |          | 107.7 | 20126.8  | 528.9  | 98848.5   | 728945.1  |      |
| PA0259000 | PA ESPERANÇA<br>PCA MÁRTIRES DE<br>ABRIL      | 4238.1  | 784501.0  | 0.0 | 0.0 | 1070.0 | 198081.0  |        |          | 286.2 | 52981.8  | 1356.2 | 251062.8  | 1035563.7 |      |
| PA0261000 |                                               | 283.9   | 49686.9   | 0.0 | 0.0 | 124.4  | 21762.8   |        |          |       |          | 124.4  | 21762.8   | 71449.7   |      |
| PA0267000 | PA PIRAMIDE                                   | 184.2   | 34094.9   | 0.0 | 0.0 | 53.5   | 9902.1    |        |          | 1.9   | 357.4    | 55.4   | 10259.5   | 44354.4   |      |
| PA0268000 | PA BACABAL                                    | 2036.5  | 377729.5  | 0.0 | 0.0 | 254.5  | 47338.0   |        |          | 7.9   | 1466.7   | 262.4  | 48804.7   | 426534.2  |      |
| PA0269000 | PA PROGRESSO<br>PA NOVA SANTA<br>MARIA        | 2811.8  | 523548.9  | 0.0 | 0.0 | 879.4  | 163894.1  |        |          | 36.8  | 6861.2   | 916.2  | 170755.3  | 694304.2  |      |
| PA0270000 |                                               | 736.5   | 136296.4  | 0.0 | 0.0 | 22.2   | 4116.3    |        |          | 144.3 | 26701.0  | 166.5  | 30817.3   | 167113.7  |      |
| PA0271000 | PA TAPERUSSU                                  | 3316.3  | 610656.1  | 0.0 | 0.0 | 793.1  | 145529.5  |        |          | 54.3  | 9906.6   | 847.3  | 155436.1  | 766092.2  |      |
| PA0272000 | PA VALE DO MOJU                               | 12523.4 | 2334791.5 | 0.0 | 0.0 | 7245.4 | 1351089.9 | 243.8  | 45462.8  | 515.9 | 96209.2  | 8005.1 | 1492762.0 | 3827553.5 | 80.3 |
| PA0273000 | PA INÁCIA                                     | 2205.6  | 408166.6  | 0.0 | 0.0 | 314.3  | 58159.8   |        |          | 138.2 | 25572.8  | 452.5  | 83732.6   | 491899.2  |      |
| PA0274000 | PA JARARACA<br>PAE SÃO JOÃO<br>BATISTA        | 1142.1  | 211351.2  | 0.0 | 0.0 | 87.1   | 16110.3   |        |          | 151.5 | 28042.8  | 238.6  | 44153.1   | 255504.2  |      |
| PA0275000 |                                               | 0.0     | 0.0       | 0.0 | 0.0 | 390.8  | 68382.8   |        |          |       |          | 390.8  | 68382.8   | 68382.8   | 41.1 |



|           |                                                                                                                                                                                                 |        |          |     |     |        |           |      |        |         |         |           |           |          |       |
|-----------|-------------------------------------------------------------------------------------------------------------------------------------------------------------------------------------------------|--------|----------|-----|-----|--------|-----------|------|--------|---------|---------|-----------|-----------|----------|-------|
| PA0276000 | P<br>A<br>E<br>N<br>O<br>S<br>S<br>A<br>S<br>E<br>N<br>H<br>O<br>R<br>A<br>D<br>O<br>L<br>I<br>V<br>R<br>A<br>M<br>E<br>N<br>T<br>O<br>P<br>C<br>A<br>E<br>L<br>I<br>Z<br>A<br>B<br>E<br>T<br>E | 0.0    | 0.0      | 0.0 | 0.0 | 180.6  | 31604.4   |      |        | 180.6   | 31604.4 | 31604.4   | 23.2      |          |       |
| PA0278000 | T<br>E<br>I<br>X<br>E<br>I<br>R<br>A                                                                                                                                                            | 27.9   | 4876.1   | 0.0 | 0.0 | 43.8   | 7662.2    |      |        | 43.8    | 7662.2  | 12538.3   |           |          |       |
| PA0286000 | P<br>A<br>M<br>A<br>N<br>D<br>A<br>C<br>A<br>R<br>U                                                                                                                                             | 3856.3 | 716382.6 | 0.0 | 0.0 | 486.4  | 90540.0   |      | 44.9   | 8368.3  | 531.3   | 98908.3   | 815290.9  |          |       |
| PA0287000 | P<br>A<br>D<br>I<br>A<br>M<br>A<br>N<br>T<br>I<br>N<br>A<br>I<br>I                                                                                                                              | 1931.7 | 357937.5 | 0.0 | 0.0 | 324.8  | 60509.3   |      | 4.4    | 811.4   | 329.2   | 61320.8   | 419258.2  |          |       |
| PA0288000 | P<br>A<br>A<br>L<br>T<br>A<br>F<br>L<br>O<br>R<br>E<br>S<br>T<br>A                                                                                                                              | 2413.9 | 449296.0 | 0.0 | 0.0 | 1309.2 | 244101.5  |      | 294.5  | 54914.1 | 1603.7  | 299015.6  | 748311.5  |          |       |
| PA0289000 | P<br>A<br>T<br>E<br>R<br>R<br>A<br>N<br>O<br>V<br>A                                                                                                                                             | 5109.4 | 943284.4 | 0.0 | 0.0 | 611.8  | 113014.2  |      | 14.2   | 2580.3  | 626.0   | 115594.5  | 1058878.9 | 89.3     |       |
| PA0290000 | P<br>A<br>S<br>U<br>Ç<br>U<br>A<br>R<br>A<br>N<br>A<br>P<br>A<br>E<br>I<br>L<br>H<br>A<br>D<br>A<br>S<br>O<br>N<br>Ç<br>A<br>S                                                                  | 3760.1 | 701587.0 | 0.0 | 0.0 | 461.4  | 86238.8   |      |        |         | 461.4   | 86238.8   | 787825.8  |          |       |
| PA0291000 |                                                                                                                                                                                                 | 43.5   | 7605.5   | 0.0 | 0.0 | 7304.7 | 1278315.6 | 22.3 | 3894.1 |         | 7326.9  | 1282209.7 | 1289815.2 | 367.6    |       |
| PA0292000 | P<br>A<br>E<br>J<br>O<br>Ã<br>O<br>P<br>I<br>L<br>A<br>T<br>O<br>S<br>P<br>A<br>E<br>S<br>A<br>N<br>T<br>O                                                                                      | 290.5  | 50839.6  | 0.0 | 0.0 | 3372.0 | 590091.8  |      |        |         | 3372.0  | 590091.8  | 640931.4  | 90.9     |       |
| PA0293000 | A<br>N<br>T<br>O<br>N<br>I<br>O<br>P<br>A<br>E<br>N<br>O<br>S<br>S<br>A<br>S<br>E<br>N<br>H<br>O<br>R<br>A<br>D<br>E                                                                            | 0.0    | 0.0      | 0.0 | 0.0 | 1316.7 | 230414.1  |      |        |         | 1316.7  | 230414.1  | 230414.1  | 13.6     |       |
| PA0294000 | N<br>A<br>Z<br>A<br>R<br>É<br>P<br>A<br>E<br>N<br>O<br>S<br>S<br>A<br>S<br>E<br>N<br>H<br>O<br>R<br>A<br>D<br>O                                                                                 | 18.0   | 3146.9   | 0.0 | 0.0 | 923.9  | 161682.1  |      |        | 30.7    | 5371.7  | 954.6     | 167053.7  | 170200.7 | 25.9  |
| PA0295000 | P<br>E<br>R<br>P<br>E<br>T<br>U<br>O<br>S<br>O<br>C<br>O<br>R<br>R<br>O<br>P<br>A<br>E<br>I<br>L<br>H<br>A<br>S<br>A<br>N<br>T<br>A                                                             | 167.4  | 29302.1  | 0.0 | 0.0 | 2515.1 | 440148.4  |      | 45.6   | 7973.4  | 2560.7  | 448121.9  | 477424.0  | 19.2     |       |
| PA0296000 | R<br>O<br>S<br>A                                                                                                                                                                                | 12.6   | 2207.8   | 0.0 | 0.0 | 353.6  | 61871.4   |      |        |         | 353.6   | 61871.4   | 64079.2   | 18.5     |       |
| PA0298000 | P<br>A<br>E<br>I<br>L<br>H<br>A<br>V<br>I<br>Ç<br>O<br>S<br>A<br>P<br>A<br>E<br>I<br>L<br>H<br>A                                                                                                | 0.0    | 0.0      | 0.0 | 0.0 | 327.0  | 57233.2   |      |        |         | 327.0   | 57233.2   | 57233.2   | 23.0     |       |
| PA0299000 | A<br>R<br>A<br>P<br>I<br>R<br>A<br>N<br>G<br>A                                                                                                                                                  | 142.4  | 24922.9  | 0.0 | 0.0 | 3325.5 | 581959.6  | 7.5  | 1318.9 |         | 3333.0  | 583278.5  | 608201.5  | 148.2    |       |
| PA0300000 | P<br>A<br>E<br>S<br>A<br>N<br>T<br>A<br>M<br>A<br>R<br>I<br>A                                                                                                                                   | 0.0    | 0.0      | 0.0 | 0.0 | 674.8  | 118095.2  |      |        |         | 674.8   | 118095.2  | 118095.2  | 55.4     |       |
| PA0301000 | P<br>A<br>E<br>S<br>A<br>N<br>T<br>O<br>A<br>F<br>O<br>N<br>S<br>O<br>P<br>A<br>E<br>N<br>O<br>S<br>S<br>A                                                                                      | 1051.3 | 183982.5 | 0.0 | 0.0 | 1495.8 | 261757.7  | 13.0 | 2266.8 | 11.6    | 2021.4  | 1520.3    | 266045.8  | 450028.3 | 123.3 |
| PA0302000 | S<br>E<br>N<br>H<br>O<br>R<br>A<br>D<br>A<br>S<br>G<br>R<br>A<br>Ç<br>A<br>S                                                                                                                    | 222.9  | 39006.8  | 0.0 | 0.0 | 1584.0 | 277199.1  |      |        | 47.3    | 8275.0  | 1631.3    | 285474.1  | 324480.9 | 40.7  |
| PA0303000 | P<br>A<br>E<br>S<br>A<br>N<br>T<br>O<br>A<br>N<br>T<br>O<br>N<br>I<br>O<br>I<br>I<br>P<br>A<br>E<br>S<br>Ã<br>O<br>F<br>R<br>A<br>N<br>C<br>I<br>S<br>C<br>O                                    | 209.5  | 36667.9  | 0.0 | 0.0 | 662.7  | 115975.0  | 10.8 | 1888.9 |         | 673.5   | 117863.9  | 154531.8  | 338.6    |       |
| PA0304000 | D<br>E<br>A<br>S<br>S<br>I<br>S                                                                                                                                                                 | 0.0    | 0.0      | 0.0 | 0.0 | 431.5  | 75506.8   | 6.1  | 1070.5 |         | 437.6   | 76577.3   | 76577.3   | 41.5     |       |
| PA0305000 | P<br>A<br>E<br>S<br>Ã<br>O<br>R<br>A<br>I<br>M<br>U<br>N<br>D<br>O<br>P<br>A<br>P<br>A<br>U<br>L<br>O                                                                                           | 551.6  | 96532.2  | 0.0 | 0.0 | 1910.1 | 334269.5  |      |        | 16.7    | 2917.6  | 1926.8    | 337187.2  | 433719.3 | 106.7 |
| PA0306000 | F<br>O<br>N<br>T<br>E<br>L<br>E<br>S                                                                                                                                                            | 297.7  | 52094.8  | 0.0 | 0.0 | 547.1  | 95748.6   |      |        |         | 547.1   | 95748.6   | 147843.4  |          |       |
| PA0307000 | P<br>A<br>A<br>L<br>T<br>O<br>B<br>O<br>N<br>I<br>T<br>O                                                                                                                                        | 2034.9 | 378861.7 | 0.0 | 0.0 | 317.2  | 59269.3   |      |        | 75.4    | 14082.1 | 392.6     | 73351.4   | 452213.0 |       |
| PA0308000 | P<br>A<br>S<br>A<br>N<br>T<br>A<br>P<br>A<br>U<br>L<br>A<br>I<br>P<br>A<br>E<br>I<br>L<br>H<br>A                                                                                                | 352.5  | 65228.4  | 0.0 | 0.0 |        |           |      |        |         | 0.0     | 0.0       | 65228.4   |          |       |
| PA0309000 | M<br>A<br>M<br>A<br>N<br>G<br>A<br>L                                                                                                                                                            | 61.9   | 10833.0  | 0.0 | 0.0 | 2423.2 | 424056.7  |      |        |         | 2423.2  | 424056.7  | 434889.7  | 71.0     |       |

|           |                           |        |           |     |     |         |           |       |          |         |           |         |           |           |        |
|-----------|---------------------------|--------|-----------|-----|-----|---------|-----------|-------|----------|---------|-----------|---------|-----------|-----------|--------|
| PA0310000 | PAE ILHA URUBUOCA         | 0.0    | 0.0       | 0.0 | 0.0 | 311.5   | 54517.4   |       |          |         |           | 311.5   | 54517.4   | 54517.4   | 25.1   |
| PA0311000 | PAE ILHA LONGA            | 0.0    | 0.0       | 0.0 | 0.0 | 158.6   | 27761.0   |       |          |         |           | 158.6   | 27761.0   | 27761.0   | 19.7   |
| PA0312000 | PAE ILHA SUMAUMA          | 198.9  | 34810.1   | 0.0 | 0.0 | 4059.9  | 710490.8  |       |          |         |           | 4059.9  | 710490.8  | 745301.0  | 331.9  |
| PA0313000 | PAE ILHA GRANDE - PACAJAI | 7669.3 | 1421561.9 | 0.0 | 0.0 | 12641.9 | 2353659.8 | 734.3 | 136579.0 | 14194.4 | 2644247.0 | 27570.6 | 5134485.9 | 6556047.8 | 1206.0 |
| PA0314000 | PAE ILHA BUÇU             | 17.9   | 3137.5    | 0.0 | 0.0 | 331.1   | 57948.4   |       |          |         |           | 331.1   | 57948.4   | 61085.9   | 110.6  |
| PA0315000 | PAE ILHA MUCURA           | 0.0    | 0.0       | 0.0 | 0.0 | 393.7   | 68904.7   |       |          |         |           | 393.7   | 68904.7   | 68904.7   | 38.4   |
| PA0316000 | PAE ILHA ARAPARI          | 41.3   | 7227.9    | 0.0 | 0.0 | 2686.8  | 470197.3  | 10.0  | 1758.7   | 27.9    | 4874.1    | 2724.7  | 476830.1  | 484058.0  | 103.1  |
| PA0317000 | PAE ILHA MOCAJUBA         | 81.1   | 14186.2   | 0.0 | 0.0 | 37.7    | 6597.4    |       |          | 17.8    | 3110.6    | 55.5    | 9708.0    | 23894.2   | 23.4   |
| PA0318000 | PA NOVO JAUARA            | 1224.7 | 226641.3  | 0.0 | 0.0 | 206.9   | 38294.1   |       |          |         |           | 206.9   | 38294.1   | 264935.4  | 28.9   |
| PA0319000 | PA ARAXITEUA              | 1172.8 | 216811.8  | 0.0 | 0.0 | 293.6   | 54111.5   |       |          |         |           | 293.6   | 54111.5   | 270923.3  |        |
| PA0320000 | PA FLOR DE MINAS          | 2323.4 | 429969.7  | 0.0 | 0.0 | 276.1   | 51092.2   |       |          | 3.9     | 725.5     | 280.0   | 51817.6   | 481787.3  |        |
| PA0321000 | PAE ILHA SÃO MATEUS       | 26.6   | 4647.5    | 0.0 | 0.0 | 1658.2  | 290183.4  |       |          |         |           | 1658.2  | 290183.4  | 294830.9  | 34.9   |
| PA0322000 | PAE ILHA GRANDE CAMETÁ    | 2.4    | 424.4     | 0.0 | 0.0 | 6691.8  | 1171065.8 |       |          |         |           | 6691.8  | 1171065.8 | 1171490.2 | 712.1  |
| PA0323000 | PAE NOSSA SENHORA DA PAZ  | 847.9  | 148375.7  | 0.0 | 0.0 | 1315.5  | 230218.7  |       |          |         |           | 1315.5  | 230218.7  | 378594.4  | 18.2   |
| PA0324000 | PAE SÃO JOÃO BATISTA II   | 749.0  | 131083.3  | 0.0 | 0.0 | 2430.8  | 425398.6  |       |          |         |           | 2430.8  | 425398.6  | 556481.9  | 56.0   |
| PA0325000 | PAE ILHA UMARITUBA        | 0.0    | 0.0       | 0.0 | 0.0 | 707.7   | 131967.3  |       |          | 0.1     | 12.9      | 707.7   | 131980.2  | 131980.2  | 35.2   |
| PA0326000 | PAE ILHA DO PAULO         | 0.0    | 0.0       | 0.0 | 0.0 | 346.3   | 60610.8   |       |          |         |           | 346.3   | 60610.8   | 60610.8   | 41.5   |
| PA0327000 | PAE ILHA DO TESO          | 0.0    | 0.0       | 0.0 | 0.0 | 1018.7  | 178267.5  |       |          | 1.1     | 192.6     | 1019.8  | 178460.1  | 178460.1  | 32.8   |
| PA0328000 | PAE ILHA RAQUEL           | 12.6   | 2350.0    | 0.0 | 0.0 | 1577.0  | 294088.0  |       |          |         |           | 1577.0  | 294088.0  | 296438.1  | 27.8   |
| PA0329000 | PAE ILHA CAETÉ            | 0.0    | 0.0       | 0.0 | 0.0 | 1133.4  | 211350.2  |       |          |         |           | 1133.4  | 211350.2  | 211350.2  | 8.4    |
| PA0330000 | PAE ILHA CUXIPIARI        | 0.0    | 0.0       | 0.0 | 0.0 | 3498.1  | 612162.6  |       |          |         |           | 3498.1  | 612162.6  | 612162.6  | 176.9  |
| PA0331000 | PAE ILHA JACARÉ XINGU     | 0.0    | 0.0       | 0.0 | 0.0 | 861.4   | 150749.0  | 1.7   | 299.5    |         |           | 863.1   | 151048.5  | 151048.5  | 30.9   |
| PA0332000 | PAE ILHA JAITUBA          | 0.0    | 0.0       | 0.0 | 0.0 | 673.0   | 117767.3  |       |          |         |           | 673.0   | 117767.3  | 117767.3  | 216.9  |
| PA0333000 | PAE ILHA JOROCA           | 4.7    | 819.0     | 0.0 | 0.0 | 1933.7  | 338406.0  |       |          |         |           | 1933.7  | 338406.0  | 339225.0  | 253.4  |
| PA0334000 | PAE ILHA MANOEL RAIMUNDO  | 0.0    | 0.0       | 0.0 | 0.0 | 1066.2  | 186586.6  |       |          |         |           | 1066.2  | 186586.6  | 186586.6  | 74.2   |
| PA0335000 | PAE ILHA DO CARMO         | 0.0    | 0.0       | 0.0 | 0.0 | 75.5    | 13210.1   |       |          |         |           | 75.5    | 13210.1   | 13210.1   | 0.3    |
| PA0337000 | PAE ILHA GAMA             | 0.0    | 0.0       | 0.0 | 0.0 | 89.1    | 15590.5   |       |          |         |           | 89.1    | 15590.5   | 15590.5   | 39.3   |
| PA0338000 | PAE ILHA GUAJARÁ          | 0.0    | 0.0       | 0.0 | 0.0 | 392.6   | 73211.6   |       |          |         |           | 392.6   | 73211.6   | 73211.6   | 19.4   |

|           |                                      |        |          |     |     |        |          |       |         |        |          |         |           |           |       |
|-----------|--------------------------------------|--------|----------|-----|-----|--------|----------|-------|---------|--------|----------|---------|-----------|-----------|-------|
| PA0339000 | PAE ILHA CACOAL                      | 0.0    | 0.0      | 0.0 | 0.0 | 330.8  | 57891.5  |       |         |        |          | 330.8   | 57891.5   | 57891.5   | 98.6  |
| PA0340000 | PAE ILHA<br>JARACUERA                | 0.0    | 0.0      | 0.0 | 0.0 | 572.8  | 100240.9 |       |         |        |          | 572.8   | 100240.9  | 100240.9  | 59.3  |
| PA0341000 | PAE ILHA MAPEUÁ                      | 0.0    | 0.0      | 0.0 | 0.0 | 355.0  | 62121.3  |       |         |        |          | 355.0   | 62121.3   | 62121.3   | 27.8  |
| PA0342000 | PAE ILHA MOIRABA                     | 0.0    | 0.0      | 0.0 | 0.0 | 229.9  | 40235.1  |       |         |        |          | 229.9   | 40235.1   | 40235.1   | 8.0   |
| PA0343000 | PAE ILHA<br>TABATINGA DO<br>CARAPAJÓ | 0.0    | 0.0      | 0.0 | 0.0 | 420.5  | 74404.7  |       |         | 6.8    | 1233.1   | 427.3   | 75637.8   | 75637.8   | 74.3  |
| PA0344000 | PAE ILHA PARURU                      | 0.0    | 0.0      | 0.0 | 0.0 | 3585.1 | 627393.3 |       |         | 139.3  | 24380.2  | 3724.4  | 651773.6  | 651773.6  | 90.6  |
| PA0345000 | PAE ILHA<br>CARIPETUBA               | 1061.5 | 185763.9 | 0.0 | 0.0 | 2584.2 | 452228.3 | 1.1   | 188.9   | 25.3   | 4434.7   | 2610.6  | 456851.9  | 642615.8  | 102.6 |
| PA0346000 | PAE ILHA URUÁ I                      | 62.8   | 10987.1  | 0.0 | 0.0 | 1516.3 | 265354.9 |       |         |        |          | 1516.3  | 265354.9  | 276342.1  | 44.7  |
| PA0347000 | PAE ILHA<br>PIQUIARANA               | 145.1  | 25395.2  | 0.0 | 0.0 | 623.4  | 109093.6 |       |         |        |          | 623.4   | 109093.6  | 134488.8  | 16.6  |
| PA0348000 | PAE ILHA XIPAÍÁ                      | 195.9  | 36172.5  | 0.0 | 0.0 | 997.3  | 182330.4 | 23.9  | 1380.0  | 18.5   | 3415.9   | 1039.7  | 187126.3  | 223298.8  | 24.5  |
| PA0349000 | PAE ILHA GRANDE<br>BELÉM             | 0.0    | 0.0      | 0.0 | 0.0 | 745.7  | 130504.2 | 103.4 | 18094.7 |        |          | 849.1   | 148598.8  | 148598.8  | 34.4  |
| PA0350000 | PAE ILHA JUTUBA                      | 0.0    | 0.0      | 0.0 | 0.0 | 453.2  | 79305.4  |       |         |        |          | 453.2   | 79305.4   | 79305.4   | 36.5  |
| PA0351000 | PAE ILHA<br>MURUTUCU                 | 0.0    | 0.0      | 0.0 | 0.0 | 826.9  | 144711.4 |       |         |        |          | 826.9   | 144711.4  | 144711.4  | 22.2  |
| PA0352000 | PAE ILHA PAQUETÁ                     | 0.0    | 0.0      | 0.0 | 0.0 | 720.6  | 126108.3 |       |         |        |          | 720.6   | 126108.3  | 126108.3  | 45.2  |
| PA0353000 | PAE ILHA SANTANA                     | 1039.3 | 192338.9 | 0.0 | 0.0 | 3442.1 | 636991.7 |       |         | 31.4   | 5802.4   | 3473.4  | 642794.1  | 835133.0  | 148.9 |
| PA0354000 | PAE ILHA<br>JUPATITUBA               | 0.0    | 0.0      | 0.0 | 0.0 | 21.7   | 3794.1   |       |         |        |          | 21.7    | 3794.1    | 3794.1    | 24.8  |
| PA0355000 | PAE ILHA URUÁ                        | 0.0    | 0.0      | 0.0 | 0.0 | 408.4  | 71469.5  |       |         | 24.4   | 4271.7   | 432.8   | 75741.2   | 75741.2   | 91.4  |
| PA0356000 | PAE ILHA<br>SANTARÉM                 | 0.0    | 0.0      | 0.0 | 0.0 | 4113.7 | 719890.3 |       |         | 25.6   | 4481.1   | 4139.3  | 724371.4  | 724371.4  | 95.7  |
| PA0357000 | PAE ILHA<br>CASTANHAL                | 0.0    | 0.0      | 0.0 | 0.0 | 1114.1 | 194962.1 |       |         | 119.0  | 20820.9  | 1233.0  | 215783.0  | 215783.0  | 122.8 |
| PA0358000 | PAE ILHA UNIÃO                       | 0.0    | 0.0      | 0.0 | 0.0 | 614.7  | 107569.4 |       |         |        |          | 614.7   | 107569.4  | 107569.4  | 74.6  |
| PA0359000 | PAE ILHA DAS<br>CINZAS               | 0.0    | 0.0      | 0.0 | 0.0 | 1922.5 | 336440.3 |       |         | 995.7  | 174243.1 | 2918.2  | 510683.4  | 510683.4  | 382.6 |
| PA0360000 | PAE ILHA PALHETA                     | 13.2   | 2314.9   | 0.0 | 0.0 | 373.4  | 65345.8  |       |         |        |          | 373.4   | 65345.8   | 67660.7   | 24.6  |
| PA0361000 | PAE ILHA DAS<br>PRACUBINHAS          | 3.2    | 567.4    | 0.0 | 0.0 | 356.4  | 62378.4  |       |         | 447.7  | 78340.1  | 804.1   | 140718.4  | 141285.9  |       |
| PA0362000 | PAE ILHA<br>CHIQUEIRO                | 0.0    | 0.0      | 0.0 | 0.0 | 2464.2 | 431239.7 | 9.4   | 1637.8  | 5.5    | 963.5    | 2479.1  | 433841.0  | 433841.0  | 113.3 |
| PA0363000 | PAE ILHA<br>CAMPUMPEMA               | 0.0    | 0.0      | 0.0 | 0.0 | 204.2  | 35736.4  |       |         | 0.0    | 1.4      | 204.2   | 35737.8   | 35737.8   | 88.5  |
| PA0364000 | PAE ILHA URUTÁÍ                      | 0.0    | 0.0      | 0.0 | 0.0 | 5239.3 | 916873.6 |       |         | 5292.4 | 926173.4 | 10531.7 | 1843047.0 | 1843047.0 | 780.1 |
| PA0365000 | PAE ILHA<br>MURUMURU                 | 0.0    | 0.0      | 0.0 | 0.0 | 1431.1 | 250449.5 |       |         | 2.7    | 479.8    | 1433.9  | 250929.2  | 250929.2  | 204.4 |

|           |                           |         |           |     |     |        |           |        |          |        |           |         |           |           |       |
|-----------|---------------------------|---------|-----------|-----|-----|--------|-----------|--------|----------|--------|-----------|---------|-----------|-----------|-------|
| PA0366000 | PAE ILHA GOIABAL          | 0.0     | 0.0       | 0.0 | 0.0 | 1087.4 | 190303.0  |        |          | 13.3   | 2328.4    | 1100.8  | 192631.4  | 192631.4  | 68.4  |
| PA0367000 | PAE ILHA BACURI           | 0.0     | 0.0       | 0.0 | 0.0 | 2032.9 | 355755.8  |        |          | 18.1   | 3168.1    | 2051.0  | 358923.9  | 358923.9  | 81.5  |
| PA0368000 | PAE ILHA SANTO AMARO      | 0.0     | 0.0       | 0.0 | 0.0 | 2368.7 | 414523.6  |        |          | 1717.6 | 300573.6  | 4086.3  | 715097.2  | 715097.2  | 302.4 |
| PA0369000 | PAE ILHA PIQUIARANA MIRIM | 56.7    | 9927.8    | 0.0 | 0.0 | 488.5  | 85495.7   |        |          |        |           | 488.5   | 85495.7   | 95423.5   | 28.6  |
| PA0370000 | PA PALHETA                | 6058.4  | 1121163.6 | 0.0 | 0.0 | 142.4  | 26345.8   |        |          | 436.9  | 80847.9   | 579.2   | 107193.7  | 1228357.3 |       |
| PA0371000 | PAE ILHA SACAJÓS GRANDE   | 0.0     | 0.0       | 0.0 | 0.0 | 3222.8 | 563992.9  | 9.2    | 1608.2   |        |           | 3232.0  | 565601.0  | 565601.0  | 240.1 |
| PA0372000 | PAE ILHA PRAIA GRANDE     | 64.8    | 11915.3   | 0.0 | 0.0 | 4351.4 | 773019.7  | 727.2  | 135275.8 |        |           | 5078.7  | 908295.5  | 920210.8  | 300.7 |
| PA0373000 | PAE ILHA MURUJUCÁ MIRI    | 6.4     | 1126.1    | 0.0 | 0.0 | 1925.7 | 339264.3  | 51.1   | 9529.8   | 183.3  | 32079.2   | 2160.1  | 380873.3  | 381999.4  | 101.0 |
| PA0374000 | PAE ILHA ATURIÁ GRANDE    | 0.0     | 0.0       | 0.0 | 0.0 | 405.1  | 70888.0   |        |          |        |           | 405.1   | 70888.0   | 70888.0   | 67.6  |
| PA0375000 | PAE ILHA DAMIÃO           | 0.0     | 0.0       | 0.0 | 0.0 | 3810.6 | 669622.2  | 573.8  | 106906.9 |        |           | 4384.4  | 776529.0  | 776529.0  | 195.1 |
| PA0376000 | PAE ILHA CAÍ GRANDE       | 0.0     | 0.0       | 0.0 | 0.0 | 558.5  | 97736.8   |        |          |        |           | 558.5   | 97736.8   | 97736.8   | 86.0  |
| PA0377000 | PAE ILHA JARIMBU          | 146.7   | 25666.2   | 0.0 | 0.0 | 8201.5 | 1457064.0 |        |          |        |           | 8201.5  | 1457064.0 | 1482730.2 | 251.9 |
| PA0378000 | PAE ILHA PANACAUERA-MIRI  | 147.5   | 25807.7   | 0.0 | 0.0 | 3791.9 | 663591.2  |        |          | 2.4    | 422.4     | 3794.4  | 664013.6  | 689821.3  | 164.3 |
| PA0379000 | PAE ILHA DO CUMBU         | 3.6     | 628.2     | 0.0 | 0.0 | 1362.9 | 238504.0  |        |          | 50.4   | 8821.1    | 1413.3  | 247325.2  | 247953.4  | 79.7  |
| PA0380000 | PAE ILHA PAULISTA         | 1.4     | 253.7     | 0.0 | 0.0 | 1563.2 | 273562.8  |        |          |        |           | 1563.2  | 273562.8  | 273816.6  | 55.1  |
| PA0381000 | PAE ILHA CONCEIÇÃO        | 0.0     | 0.0       | 0.0 | 0.0 | 4711.8 | 824563.8  |        |          |        |           | 4711.8  | 824563.8  | 824563.8  | 67.4  |
| PA0382000 | PAE ILHA MUTIRÃO          | 216.6   | 37905.3   | 0.0 | 0.0 | 1446.2 | 253084.9  |        |          |        |           | 1446.2  | 253084.9  | 290990.2  | 29.6  |
| PA0383000 | PA AREIA BRANCA           | 1253.4  | 232517.8  | 0.0 | 0.0 | 165.7  | 30875.8   |        |          | 5.8    | 1088.2    | 171.5   | 31964.1   | 264481.9  |       |
| PA0384000 | PA LUIZ INÁCIO            | 20590.1 | 3825885.8 | 0.0 | 0.0 | 9740.9 | 1814753.7 |        |          | 4612.1 | 858074.9  | 14353.0 | 2672828.6 | 6498714.4 |       |
| PA0385000 | PAE ILHA COMPRIDA         | 0.0     | 0.0       | 0.0 | 0.0 | 15.4   | 2692.2    |        |          |        |           | 15.4    | 2692.2    | 2692.2    | 17.0  |
| PA0386000 | PAE ILHA MAUBA            | 11.8    | 2059.7    | 0.0 | 0.0 | 807.0  | 141232.1  |        |          | 14.8   | 2590.4    | 821.8   | 143822.5  | 145882.2  | 58.6  |
| PA0388000 | PAE COMPLEXO MARACUJÁ     | 14.7    | 2575.5    | 0.0 | 0.0 | 731.3  | 127969.0  |        |          | 14.0   | 2455.1    | 745.3   | 130424.1  | 132999.6  | 30.0  |
| PA0389000 | PAE ILHA ANUERÁ           | 3.6     | 630.3     | 0.0 | 0.0 | 210.8  | 36881.8   |        |          |        |           | 210.8   | 36881.8   | 37512.1   | 82.7  |
| PA0390000 | PAE ILHA DE MELGAÇO       | 1338.5  | 240629.5  | 0.0 | 0.0 | 5762.4 | 1037996.2 | 1945.6 | 352869.0 | 4677.8 | 844379.4  | 12385.7 | 2235244.6 | 2475874.1 | 33.4  |
| PA0391000 | PAE ILHA MUJIRUM          | 187.2   | 34546.8   | 0.0 | 0.0 | 7105.3 | 1270518.6 |        |          | 7878.7 | 1413722.6 | 14984.0 | 2684241.2 | 2718788.0 | 158.1 |
| PA0393000 | PA NAZARE                 | 2643.6  | 489349.3  | 0.0 | 0.0 | 825.0  | 152806.0  |        |          | 1647.2 | 305140.4  | 2472.1  | 457946.4  | 947295.7  |       |
| PA0394000 | PAE TRÊS IRMÃS            | 0.0     | 0.0       | 0.0 | 0.0 | 517.6  | 90578.2   | 327.9  | 57382.2  | 0.0    | 3.4       | 845.5   | 147963.8  | 147963.8  | 91.8  |

|           |                                                 |        |          |     |     |        |           |      |         |         |           |           |          |          |
|-----------|-------------------------------------------------|--------|----------|-----|-----|--------|-----------|------|---------|---------|-----------|-----------|----------|----------|
| PA0395000 | PAE ILHA COROA NOVA                             | 0.0    | 0.0      | 0.0 | 0.0 | 671.3  | 117478.2  |      |         | 671.3   | 117478.2  | 117478.2  | 81.8     |          |
| PA0396000 | PAE ILHA MARINTEUA                              | 3.3    | 584.6    | 0.0 | 0.0 | 343.3  | 60071.6   | 10.7 | 1874.5  | 354.0   | 61946.1   | 62530.7   | 32.6     |          |
| PA0397000 | PAE ILHA PACUÍ                                  | 0.0    | 0.0      | 0.0 | 0.0 | 760.5  | 133087.0  |      |         | 760.5   | 133087.0  | 133087.0  | 46.8     |          |
| PA0398000 | PAE ILHA ITANDUBA                               | 0.0    | 0.0      | 0.0 | 0.0 | 780.9  | 136657.0  | 74.3 | 13004.2 | 855.2   | 149661.2  | 149661.2  | 46.7     |          |
| PA0399000 | PAE ILHA ITAUNA                                 | 0.0    | 0.0      | 0.0 | 0.0 | 755.3  | 132176.2  |      |         | 755.3   | 132176.2  | 132176.2  | 146.7    |          |
| PA0400000 | PAE ILHA AJARAÍ                                 | 0.0    | 0.0      | 0.0 | 0.0 | 345.3  | 60423.9   |      |         | 345.3   | 60423.9   | 60423.9   | 23.5     |          |
| PA0401000 | PAE ILHA SANTANA DE CAMETÁ                      | 0.0    | 0.0      | 0.0 | 0.0 | 2546.9 | 445704.5  | 7.2  | 1260.2  | 2554.1  | 446964.7  | 446964.7  | 84.0     |          |
| PA0402000 | PA NOVA VIDA                                    | 1998.9 | 372044.2 | 0.0 | 0.0 | 404.3  | 75223.0   |      |         | 1665.4  | 310445.5  | 2069.7    | 385668.5 | 757712.6 |
| PA0403000 | PA GLEBINHA                                     | 709.1  | 131956.8 | 0.0 | 0.0 | 43.3   | 8056.5    |      |         | 1007.8  | 187788.8  | 1051.1    | 195845.3 | 327802.1 |
| PA0404000 | PAE ILHA NOVA PAE ILHA JUPATITUBA DE CURRALINHO | 0.0    | 0.0      | 0.0 | 0.0 | 227.9  | 39880.0   |      |         | 227.9   | 39880.0   | 39880.0   | 18.5     |          |
| PA0405000 | PAE ILHA CANATICU PAE ILHA DO MUTUM             | 666.7  | 119695.2 | 0.0 | 0.0 | 9964.6 | 1798014.8 | 75.3 | 14039.3 | 10039.9 | 1812054.1 | 1931749.3 | 191.5    |          |
| PA0406000 | PAE ILHA DO FURO GRANDE                         | 0.0    | 0.0      | 0.0 | 0.0 | 1061.1 | 197871.5  |      |         | 62.1    | 11587.3   | 1123.2    | 209458.8 | 209458.8 |
| PA0407000 | PAE ILHA DO FURO GRANDE                         | 4.7    | 819.5    | 0.0 | 0.0 | 2749.5 | 483228.1  |      |         | 1517.8  | 267393.3  | 4267.3    | 750621.4 | 751440.9 |
| PA0408000 | PAE ILHA ITABOCA PAE ILHA PINDOBAL GRANDE       | 6.5    | 1135.4   | 0.0 | 0.0 | 1311.4 | 229493.3  |      |         | 0.1     | 14.3      | 1311.5    | 229507.6 | 230643.1 |
| PA0409000 | PAE ILHA ITABOCA PAE ILHA PINDOBAL GRANDE       | 7.9    | 1385.5   | 0.0 | 0.0 | 2224.8 | 389338.8  |      |         |         |           | 2224.8    | 389338.8 | 390724.3 |
| PA0410000 | PA JUTAÍ MIRIM                                  | 42.9   | 7506.5   | 0.0 | 0.0 | 3688.5 | 645488.1  |      |         |         |           | 3688.5    | 645488.1 | 652994.6 |
| PA0411000 | PA JUTAÍ MIRIM                                  | 1734.5 | 320980.8 | 0.0 | 0.0 | 22.7   | 4192.9    |      |         | 435.1   | 80512.5   | 457.7     | 84705.5  | 405686.2 |
| PA0412000 | PAE ILHA COROCA PAE ILHA PAQUETÁ II             | 0.0    | 0.0      | 0.0 | 0.0 | 1852.7 | 345484.8  |      |         |         |           | 1852.7    | 345484.8 | 345484.8 |
| PA0413000 | PAE ILHA BOA VISTA                              | 0.0    | 0.0      | 0.0 | 0.0 | 676.4  | 118375.2  |      |         |         |           | 676.4     | 118375.2 | 118375.2 |
| PA0414000 | PAE ILHA BOA VISTA                              | 13.0   | 2275.9   | 0.0 | 0.0 | 835.8  | 146271.4  |      |         | 75.3    | 13176.7   | 911.1     | 159448.1 | 161724.1 |
| PA0415000 | PAE ILHA CHAVES                                 | 0.0    | 0.0      | 0.0 | 0.0 | 882.3  | 154402.1  |      |         | 0.0     | 0.2       | 882.3     | 154402.3 | 154402.3 |
| PA0416000 | PAE ILHA LARANJA                                | 21.5   | 3763.6   | 0.0 | 0.0 | 1515.4 | 265201.0  |      |         |         |           | 1515.4    | 265201.0 | 268964.5 |
| PA0417000 | PAE ILHA SÃO JOÃO PAE ILHA TUCUPI GRANDE        | 0.0    | 0.0      | 0.0 | 0.0 | 737.6  | 129079.9  |      |         | 48.5    | 8492.0    | 786.1     | 137571.9 | 137571.9 |
| PA0418000 | PAE ILHA SANTO ANTÔNIO III                      | 0.0    | 0.0      | 0.0 | 0.0 | 1429.4 | 250151.0  |      |         |         |           | 1429.4    | 250151.0 | 250151.0 |
| PA0419000 | PAE ILHA SANTO ANTÔNIO III                      | 0.0    | 0.0      | 0.0 | 0.0 | 1277.2 | 223503.1  |      |         |         |           | 1277.2    | 223503.1 | 223503.1 |
| PA0430000 | PA PATAUATEUA                                   | 2408.0 | 445381.9 | 0.0 | 0.0 | 322.8  | 59731.6   |      |         | 26.1    | 4839.3    | 349.0     | 64570.9  | 509952.8 |
| PA0431000 | PA FE EM DEUS                                   | 380.9  | 70493.1  | 0.0 | 0.0 |        |           |      |         | 3.7     | 686.7     | 3.7       | 686.7    | 71179.8  |

|           |                                     |        |           |     |     |         |            |        |          |          |            |          |            |            |        |
|-----------|-------------------------------------|--------|-----------|-----|-----|---------|------------|--------|----------|----------|------------|----------|------------|------------|--------|
| PA0433000 | PA PEDRO SOUZA<br>PAE ILHA SANTA    | 1058.7 | 196282.6  | 0.0 | 0.0 | 68.3    | 12700.2    |        |          | 25.4     | 4713.7     | 93.7     | 17413.8    | 213696.4   |        |
| PA0436000 | MARIA<br>PAE ILHA                   | 0.0    | 0.0       | 0.0 | 0.0 | 1034.8  | 181090.9   |        |          | 93.7     | 16393.7    | 1128.5   | 197484.6   | 197484.6   | 53.4   |
| PA0437000 | MARITUBINHA<br>PAE ILHA             | 0.0    | 0.0       | 0.0 | 0.0 | 4311.5  | 754504.5   |        |          | 0.0      | 0.6        | 4311.5   | 754505.1   | 754505.1   | 63.3   |
| PA0438000 | ATATAZINHO<br>PAE ILHA              | 35.6   | 6237.5    | 0.0 | 0.0 | 1886.3  | 330101.5   |        |          | 26.7     | 4669.5     | 1913.0   | 334771.0   | 341008.5   | 109.0  |
| PA0439000 | CAJUUBINHA<br>PAE ILHA SANTA        | 0.0    | 0.0       | 0.0 | 0.0 | 1992.4  | 348675.5   |        |          |          |            | 1992.4   | 348675.5   | 348675.5   | 98.4   |
| PA0441000 | CATARINA<br>PAE ILHA                | 0.0    | 0.0       | 0.0 | 0.0 | 379.5   | 70769.0    |        |          | 16.0     | 2974.7     | 395.5    | 73743.6    | 73743.6    |        |
| PA0442000 | TRACUATEUA<br>PAE ILHA BELA         | 71.4   | 13317.0   | 0.0 | 0.0 | 826.4   | 154098.7   |        |          |          |            | 826.4    | 154098.7   | 167415.7   | 46.2   |
| PA0443000 | PATRIA<br>PAE ILHA SÃO              | 5.9    | 1096.5    | 0.0 | 0.0 | 389.8   | 72682.6    |        |          | 12.0     | 2236.2     | 401.8    | 74918.7    | 76015.2    | 0.7    |
| PA0444000 | RAIMUNDO                            | 148.9  | 27767.9   | 0.0 | 0.0 | 2784.6  | 519269.5   | 6.5    | 1208.8   | 12.3     | 2284.8     | 2803.3   | 522763.2   | 550531.1   | 13.8   |
| PA0445000 | PAE ILHA SORVA<br>PAE ILHA SÃO JOÃO | 4.8    | 890.6     | 0.0 | 0.0 | 1402.0  | 261441.4   |        |          | 27.8     | 5192.2     | 1429.8   | 266633.6   | 267524.2   |        |
| PA0447000 | I                                   | 164.7  | 30711.2   | 0.0 | 0.0 | 3680.3  | 686295.6   | 145.6  | 27144.6  | 14.6     | 2720.7     | 3840.4   | 716160.9   | 746872.1   | 61.2   |
| PA0448000 | PAE ILHA CALHEIRA                   | 195.3  | 36414.6   | 0.0 | 0.0 | 2156.5  | 402152.3   |        |          |          |            | 2156.5   | 402152.3   | 438566.9   | 21.3   |
| PA0449000 | PAE ILHA MOSSORO<br>PAE ILHA        | 0.0    | 0.0       | 0.0 | 0.0 | 753.6   | 140519.3   | 0.0    | 2.0      |          |            | 753.6    | 140521.2   | 140521.2   | 1.1    |
| PA0450000 | SAMANAJÓS                           | 3.6    | 672.5     | 0.0 | 0.0 | 2566.3  | 478557.4   |        |          |          |            | 2566.3   | 478557.4   | 479229.9   |        |
| PA0451000 | PAE ILHA ARARAS<br>PAE ILHA SAO     | 0.0    | 0.0       | 0.0 | 0.0 | 258.8   | 45290.1    |        |          |          |            | 258.8    | 45290.1    | 45290.1    | 79.8   |
| PA0452000 | PEDRO E BARBOSA<br>PAE ILHA GRANDE  | 7.0    | 1227.4    | 0.0 | 0.0 | 678.8   | 118794.9   |        |          | 2.0      | 354.1      | 680.9    | 119149.0   | 120376.4   | 116.6  |
| PA0453000 | DO LAGUNA<br>PAE ILHA SANTA         | 8468.8 | 1536111.7 | 0.0 | 0.0 | 60091.8 | 11021811.4 | 4368.8 | 342467.1 | 103625.9 | 18967553.7 | 168086.5 | 30331832.2 | 31867943.9 | 731.6  |
| PA0454000 | MARIA I<br>PAE ILHA                 | 0.0    | 0.0       | 0.0 | 0.0 | 766.0   | 134050.9   |        |          | 333.0    | 58273.0    | 1099.0   | 192323.9   | 192323.9   | 38.5   |
| PA0455000 | MACUJUBIM                           | 512.3  | 89901.7   | 0.0 | 0.0 | 4138.8  | 725076.5   |        |          | 7017.5   | 1229226.0  | 11156.3  | 1954302.5  | 2044204.2  | 423.7  |
| PA0456000 | PAE ILHA ATURIÁ<br>PAE ILHA DOS     | 41.4   | 7239.2    | 0.0 | 0.0 | 5642.4  | 987527.0   |        |          | 7520.8   | 1316498.2  | 13163.2  | 2304025.2  | 2311264.4  | 212.7  |
| PA0457000 | MACACOS                             | 8361.8 | 1556079.1 | 0.0 | 0.0 | 41924.2 | 7788115.9  |        |          | 71941.8  | 13381862.1 | 0        | 21169978.0 | 22726057.1 | 3568.8 |
| PA0458000 | PA RIO BUJARU                       | 7183.1 | 1329312.5 | 0.0 | 0.0 | 811.7   | 150214.4   |        |          | 67.5     | 12485.0    | 879.2    | 162699.4   | 1492011.9  |        |
| PA0459000 | PA TARIRATEUA<br>PAE ILHA CARARUÁ-  | 2522.1 | 465829.7  | 0.0 | 0.0 | 603.9   | 111646.9   |        |          | 310.0    | 56990.4    | 913.9    | 168637.3   | 634467.0   |        |
| PA0461000 | GRANDE                              | 18.7   | 3278.2    | 0.0 | 0.0 | 5560.6  | 964292.2   | 388.2  | 46686.6  | 854.0    | 143745.1   | 6802.8   | 1154723.9  | 1158002.1  | 139.7  |
| PA0462000 | PAE LUZ DA VIDA                     | 0.0    | 0.0       | 0.0 | 0.0 | 2801.7  | 490296.4   |        |          | 499.3    | 87382.9    | 3301.0   | 577679.3   | 577679.3   | 290.0  |
| PA0464000 | PAE ILHA JURUPARI                   | 165.9  | 30216.0   | 0.0 | 0.0 | 4175.0  | 755265.0   |        |          | 15.7     | 2769.5     | 4190.7   | 758034.5   | 788250.5   | 5.2    |
| PA0465000 | PAE ILHA TAQUARI                    | 130.4  | 23578.9   | 0.0 | 0.0 | 4966.6  | 872623.8   | 492.1  | 90365.7  | 687.0    | 120292.8   | 6145.7   | 1083282.3  | 1106861.2  | 376.6  |

|           |                                        |        |          |     |     |         |           |        |           |         |           |          |            |        |
|-----------|----------------------------------------|--------|----------|-----|-----|---------|-----------|--------|-----------|---------|-----------|----------|------------|--------|
| PA0466000 | PAE ILHA ITAPERA                       | 319.7  | 58833.2  | 0.0 | 0.0 | 4749.6  | 854207.4  | 563.0  | 104856.7  |         | 5312.6    | 959064.1 | 1017897.2  | 64.3   |
| PA0467000 | PAE ILHA URUÁ II                       | 5.0    | 940.4    | 0.0 | 0.0 | 2758.8  | 514452.7  |        |           |         | 2758.8    | 514452.7 | 515393.0   | 46.2   |
| PA0468000 | PAE ILHA SANTA APOLONIA                | 59.4   | 11080.6  | 0.0 | 0.0 | 1501.6  | 276807.2  | 159.0  | 9859.6    |         | 1660.6    | 286666.8 | 297747.4   | 54.6   |
| PA0469000 | PAE ILHA PANACU                        | 0.0    | 0.0      | 0.0 | 0.0 | 3841.7  | 676300.7  | 1120.3 | 207857.9  |         | 4961.9    | 884158.5 | 884158.5   | 63.7   |
| PA0470000 | PAE ILHA SAPATEIRO                     | 0.0    | 0.0      | 0.0 | 0.0 | 219.4   | 38400.0   |        |           |         | 219.4     | 38400.0  | 38400.0    | 45.1   |
| PA0471000 | PAE SANTA ROSA DO MARACATI             | 52.4   | 9166.6   | 0.0 | 0.0 | 2882.4  | 504423.3  |        |           |         | 2882.4    | 504423.3 | 513589.9   | 63.5   |
| PA0472000 | PAE ILHA SANTA MARIA II                | 0.0    | 0.0      | 0.0 | 0.0 | 836.8   | 146443.2  |        |           |         | 836.8     | 146443.2 | 146443.2   | 58.8   |
| PA0473000 | PAE ILHA SANTA MARIA III               | 0.0    | 0.0      | 0.0 | 0.0 | 68.1    | 11923.9   |        |           |         | 68.1      | 11923.9  | 11923.9    | 17.5   |
| PA0474000 | PAE ILHA MARIANA                       | 0.0    | 0.0      | 0.0 | 0.0 | 222.4   | 38927.1   |        |           |         | 222.4     | 38927.1  | 38927.1    | 38.6   |
| PA0475000 | PAE ILHA NOSSA SENHORA DO LIVRAMENTO I | 50.7   | 9455.3   | 0.0 | 0.0 | 2077.1  | 387330.1  |        |           |         | 2077.1    | 387330.1 | 396785.3   | 0.2    |
| PA0477000 | PAE ILHA ENTRE-ILHAS                   | 0.0    | 0.0      | 0.0 | 0.0 | 22.6    | 3954.7    |        |           |         | 22.6      | 3954.7   | 3954.7     | 14.5   |
| PA0478000 | PAE ILHA JACAREUÁ                      | 6.8    | 1227.2   | 0.0 | 0.0 | 439.0   | 76924.3   |        |           |         | 439.0     | 76924.3  | 78151.5    | 609.2  |
| PA0479000 | PAE ILHA BIRIBATUBA                    | 4.3    | 756.0    | 0.0 | 0.0 | 222.0   | 38851.4   |        |           |         | 222.0     | 38851.4  | 39607.4    | 52.9   |
| PA0480000 | PAE ILHA DO MEIO                       | 4.0    | 693.6    | 0.0 | 0.0 | 11485.3 | 2009931.8 |        |           | 14286.8 | 2500196.8 | 25772.2  | 4510128.6  | 13.2   |
| PA0481000 | PAE ILHA MARACUJÁ I                    | 0.0    | 0.0      | 0.0 | 0.0 | 9729.0  | 1702578.7 |        |           | 11814.4 | 2067519.8 | 21543.4  | 3770098.5  | 24.7   |
| PA0482000 | PAE ILHA RASA                          | 0.0    | 0.0      | 0.0 | 0.0 | 1827.3  | 319781.4  |        |           | 651.6   | 114028.8  | 2478.9   | 433810.2   | 64.6   |
| PA0483000 | PAE ILHA DO TELES                      | 0.0    | 0.0      | 0.0 | 0.0 | 2198.2  | 384689.0  |        |           | 1243.0  | 217517.9  | 3441.2   | 602206.9   | 71.2   |
| PA0484000 | PAE ILHA CALDEIRÃO                     | 0.0    | 0.0      | 0.0 | 0.0 | 2273.7  | 397898.4  | 474.5  | 83037.3   | 5139.1  | 899348.2  | 7887.3   | 1380283.9  | 103.4  |
| PA0485000 | PAE ILHA CONCEIÇÃO I                   | 83.7   | 14642.7  | 0.0 | 0.0 | 8660.3  | 1515559.7 |        |           | 3836.0  | 671304.3  | 12496.4  | 2186864.0  | 4.3    |
| PA0486000 | PAE ILHA SALVADOR                      | 1.7    | 298.4    | 0.0 | 0.0 | 13451.0 | 2353931.6 |        |           | 12221.8 | 2138808.4 | 25672.8  | 4492740.0  | 15.3   |
| PA0487000 | PAE ILHA QUEIMADA                      | 183.1  | 32566.2  | 0.0 | 0.0 | 24246.1 | 4243333.5 | 2000.4 | 3500065.7 | 36895.9 | 6456959.5 | 81142.3  | 14200358.8 | 4141.0 |
| PA0488000 | PAE ILHA DOS CARÁS                     | 0.0    | 0.0      | 0.0 | 0.0 | 6583.0  | 1152033.1 |        |           | 6056.3  | 1059849.5 | 12639.3  | 2211882.6  | 674.1  |
| PA0489000 | PAE ILHA PANEMA                        | 0.8    | 134.1    | 0.0 | 0.0 | 2676.7  | 468414.6  | 1.4    | 252.2     | 4323.6  | 756628.4  | 7001.7   | 1225295.1  | 536.2  |
| PA0490000 | PAE ILHA JURUPARI I                    | 604.3  | 105225.6 | 0.0 | 0.0 | 9194.8  | 1587375.5 | 6364.9 | 657952.8  | 19991.8 | 3488114.0 | 35551.5  | 5733442.3  | 2577.7 |
| PA0491000 | PAE ILHA BAIANO                        | 0.0    | 0.0      | 0.0 | 0.0 | 2060.7  | 360620.6  |        |           | 1529.7  | 267699.5  | 3590.4   | 628320.1   | 237.9  |
| PA0492000 | PAE ILHA TRAMBIOCA                     | 1881.2 | 329213.6 | 0.0 | 0.0 | 5038.6  | 881748.4  | 43.1   | 7535.1    | 99.6    | 17435.6   | 5181.3   | 906719.1   | 382.2  |
| PA0493000 | PA LUIS CARLOS                         | 1275.2 | 235989.8 | 0.0 | 0.0 |         |           |        |           |         | 0.0       | 0.0      | 235989.8   |        |

## PRESTES

|           |                                    |        |           |     |     |         |           |                |          |         |           |         |           |                  |
|-----------|------------------------------------|--------|-----------|-----|-----|---------|-----------|----------------|----------|---------|-----------|---------|-----------|------------------|
| PA0494000 | PA MARIA BONITA<br>PAE ILHA        | 1252.6 | 231801.9  | 0.0 | 0.0 | 39.1    | 7231.0    |                |          | 45.1    | 8353.2    | 84.2    | 15584.2   | 247386.1         |
| PA0495000 | PIRARUAIA                          | 22.2   | 3876.6    | 0.0 | 0.0 | 489.5   | 85665.2   | 9.4            | 1638.3   |         |           | 498.9   | 87303.4   | 91180.1 75.4     |
| PA0496000 | PAE ILHA IOIÁS<br>PAE ILHA DO CABO | 0.0    | 0.0       | 0.0 | 0.0 | 211.7   | 37040.9   |                |          |         |           | 211.7   | 37040.9   | 37040.9 67.8     |
| PA0497000 | DICO                               | 0.0    | 0.0       | 0.0 | 0.0 | 418.9   | 73299.1   |                |          | 117.7   | 20596.4   | 536.5   | 93895.6   | 93895.6          |
| PA0498000 | PAE TIRIRICA                       | 215.2  | 37661.9   | 0.0 | 0.0 | 2413.4  | 422338.8  | 36.0           | 6303.8   |         |           | 2449.4  | 428642.7  | 466304.6 182.1   |
| PA0499000 | PAE ILHA DO BOI                    | 0.0    | 0.0       | 0.0 | 0.0 | 2438.4  | 426713.2  |                |          |         |           | 2438.4  | 426713.2  | 426713.2 132.5   |
| PA0500000 | PAE ILHA JAPIIM<br>SECO            | 0.0    | 0.0       | 0.0 | 0.0 | 2073.9  | 362931.4  |                |          |         |           | 2073.9  | 362931.4  | 362931.4 132.1   |
| PA0501000 | PAE ILHA MURUMURU I                | 80.3   | 14044.9   | 0.0 | 0.0 | 5159.0  | 902827.4  |                |          |         |           | 5159.0  | 902827.4  | 916872.3 98.2    |
| PA0502000 | PAE ILHA DO<br>TANGARAZINHO        | 31.5   | 5509.2    | 0.0 | 0.0 | 1820.8  | 318647.3  |                |          |         |           | 1820.8  | 318647.3  | 324156.6 21.0    |
| PA0503000 | PAE ILHA FURO<br>MUANÁ             | 17.5   | 3061.3    | 0.0 | 0.0 | 2070.4  | 362325.3  |                |          | 91.1    | 15943.1   | 2161.5  | 378268.3  | 381329.6 37.4    |
| PA0504000 | PAE COMPLEXO<br>BATUQUE            | 0.0    | 0.0       | 0.0 | 0.0 | 161.2   | 28206.9   |                |          |         |           | 161.2   | 28206.9   | 28206.9 115.6    |
| PA0505000 | PAE ILHA<br>MIRITIAPINA            | 19.8   | 3467.8    | 0.0 | 0.0 | 5531.2  | 967955.1  |                |          | 12910.6 | 2259357.8 | 18441.8 | 3227313.0 | 3230780.8 376.2  |
| PA0506000 | PAE ILHA ITUQUARA<br>PA ABRIL      | 0.0    | 0.0       | 0.0 | 0.0 | 6822.8  | 1193992.1 |                |          | 21738.1 | 3804174.2 | 28561.0 | 4998166.3 | 4998166.3 375.4  |
| PA0507000 | VERMELHO                           | 6304.1 | 1166556.5 | 0.0 | 0.0 | 478.3   | 88054.2   |                |          | 0.9     | 161.9     | 479.2   | 88216.1   | 1254772.6        |
| PA0508000 | PAE ILHA PRACAXI                   | 439.8  | 76965.9   | 0.0 | 0.0 | 5233.4  | 915958.6  |                |          | 4716.1  | 825482.5  | 9949.5  | 1741441.1 | 1818407.0 1135.9 |
| PA0509000 | PAE ILHA BUIUSSU                   | 0.0    | 0.0       | 0.0 | 0.0 | 8385.0  | 1467374.1 |                |          | 7686.5  | 1345140.3 | 16071.5 | 2812514.5 | 2812514.5 1453.8 |
| PA0510000 | PAE ILHA LIMÃO                     | 347.0  | 60717.7   | 0.0 | 0.0 | 14606.1 | 2556072.7 |                |          | 25210.0 | 4411754.4 | 39816.2 | 6967827.1 | 7028544.8 628.3  |
| PA0511000 | PAE ILHA PEREIRA                   | 21.3   | 3722.8    | 0.0 | 0.0 | 3185.1  | 557387.5  |                |          | 5331.4  | 932994.4  | 8516.5  | 1490381.9 | 1494104.7 603.8  |
| PA0512000 | PAE ILHA SANTO<br>AMARO II         | 533.2  | 93313.5   | 0.0 | 0.0 | 5299.0  | 927330.5  |                |          | 4687.0  | 820229.3  | 9986.1  | 1747559.7 | 1840873.3 553.8  |
| PA0513000 | PAE ILHA JEJUTEUA                  | 1554.0 | 287580.1  | 0.0 | 0.0 | 1066.8  | 197427.8  |                |          | 1528.0  | 282764.2  | 2594.8  | 480192.0  | 767772.1 32.7    |
| PA0514000 | PAE ILHA BOM<br>SAMARITANO         | 601.3  | 111365.4  | 0.0 | 0.0 | 5387.2  | 999595.8  |                |          | 91.5    | 16946.6   | 5478.7  | 1016542.4 | 1127907.8 101.5  |
| PA0515000 | PAE ILHA PRACUUBA-GRANDE           | 542.1  | 99987.8   | 0.0 | 0.0 | 2948.7  | 539425.8  | 74.9           | 13865.2  | 132.4   | 24121.5   | 3156.1  | 577412.6  | 677400.4 40.6    |
| PA0516000 | PAE ILHA CARIÁ-<br>GUAJARÁ         | 1066.7 | 197400.4  | 0.0 | 0.0 | 2724.9  | 504275.7  |                |          | 180.1   | 33332.4   | 2905.0  | 537608.1  | 735008.6 136.6   |
| PA0517000 | PAE ILHA SÃO<br>RAIMUNDO II        | 658.1  | 122025.8  | 0.0 | 0.0 | 5215.7  | 925551.9  | 834.9<br>1924. | 41804.3  | 18.0    | 3349.0    | 6068.6  | 970705.2  | 1092731.0 174.5  |
| PA0518000 | PAE ILHA CENTRAL                   | 7178.8 | 1337273.8 | 0.0 | 0.0 | 21542.4 | 4012792.3 | 7              | 358720.9 | 500.4   | 93270.0   | 23967.4 | 4464783.3 | 5802057.1 402.2  |
| PA0519000 | PAE BAIXO ANAJÁS I                 | 24.1   | 4216.6    | 0.0 | 0.0 | 5450.6  | 953857.8  |                |          | 9064.8  | 1586345.7 | 14515.4 | 2540203.5 | 2544420.1 970.1  |



|           |                                                      |        |          |     |     |         |            |       |         |              |            |              |            |            |        |
|-----------|------------------------------------------------------|--------|----------|-----|-----|---------|------------|-------|---------|--------------|------------|--------------|------------|------------|--------|
| PA0520000 | P AE BAIXO ANAJÁS<br>II                              | 3145.7 | 553088.9 | 0.0 | 0.0 | 34140.2 | 5977713.7  |       |         | 62532.5      | 10948941.3 | 96672.7      | 16926655.1 | 17479744.0 | 1943.9 |
| PA0521000 | PE BORBA GATO                                        | 3518.7 | 654454.0 | 0.0 | 0.0 | 4435.1  | 826961.9   |       |         | 553.2        | 103160.4   | 4988.4       | 930122.3   | 1584576.3  |        |
| PA0522000 | PE PINDORAMA                                         | 2927.2 | 543524.0 | 0.0 | 0.0 | 946.7   | 176276.6   |       |         | 97.6         | 18180.1    | 1044.2       | 194456.8   | 737980.7   |        |
| PA0523000 | PE ITABIRA                                           | 226.4  | 41420.2  | 0.0 | 0.0 | 252.1   | 45065.1    |       |         | 24.6         | 4417.1     | 276.6        | 49482.2    | 90902.4    | 0.0    |
| PA0524000 | PE MOCAJUBA                                          | 496.5  | 90596.1  | 0.0 | 0.0 | 149.1   | 26574.6    |       |         |              |            | 149.1        | 26574.6    | 117170.7   |        |
| PA0525000 | P AE ILHA<br>CHARAPUCU                               | 404.3  | 70754.4  | 0.0 | 0.0 | 66133.2 | 11573307.5 | 49.7  | 8700.0  | 122300.<br>9 | 21402652.3 | 188483.<br>8 | 32984659.8 | 33055414.2 | 7765.2 |
| PA0526000 | P AE ILHA DO PARÁ                                    | 0.0    | 0.0      | 0.0 | 0.0 | 17070.4 | 2987315.8  |       |         | 23658.4      | 4140216.8  | 40728.8      | 7127532.5  | 7127532.5  | 2171.0 |
| PA0527000 | P AE ILHA TERÊ                                       | 0.0    | 0.0      | 0.0 | 0.0 | 4287.9  | 750381.2   |       |         | 62.9         | 11007.3    | 4350.8       | 761388.4   | 761388.4   | 81.8   |
| PA0529000 | P AE ILHA PAQUETÁ<br>III                             | 1.5    | 260.0    | 0.0 | 0.0 | 248.9   | 43557.1    |       |         |              |            | 248.9        | 43557.1    | 43817.1    | 30.7   |
| PA0530000 | P AE ILHA ARARAIM                                    | 0.0    | 0.0      | 0.0 | 0.0 | 674.2   | 117976.5   |       |         |              |            | 674.2        | 117976.5   | 117976.5   | 83.8   |
| PA0531000 | P AE ILHA SARACÁ                                     | 0.0    | 0.0      | 0.0 | 0.0 | 1200.3  | 210051.1   |       |         |              |            | 1200.3       | 210051.1   | 210051.1   | 90.3   |
| PA0532000 | P AE ILHA TATUOCA-<br>JAPIIM                         | 3021.2 | 528717.9 | 0.0 | 0.0 | 18052.7 | 3159221.8  |       |         | 47.0         | 8217.1     | 18099.7      | 3167438.8  | 3696156.7  | 540.9  |
| PA0533000 | PE ITAPEVA                                           | 1046.2 | 191810.6 | 0.0 | 0.0 | 494.8   | 88112.7    | 530.3 | 92842.3 | 220.1        | 40091.5    | 1245.1       | 221046.5   | 412857.1   | 17.0   |
| PA0534000 | P AE ILHA<br>UMARITUBA<br>JUACARA                    | 0.0    | 0.0      | 0.0 | 0.0 | 2229.4  | 390487.9   | 28.3  | 4956.3  |              |            | 2257.7       | 395444.1   | 395444.1   | 68.1   |
| PA0535000 | P AE ILHA ANAJAI                                     | 395.2  | 72742.5  | 0.0 | 0.0 | 921.1   | 163044.5   |       |         |              |            | 921.1        | 163044.5   | 235786.9   | 63.8   |
| PA0536000 | P AE ILHA VITÓRIA                                    | 0.0    | 0.0      | 0.0 | 0.0 | 1359.3  | 237900.8   | 14.0  | 2457.6  | 497.7        | 87102.5    | 1871.1       | 327460.8   | 327460.8   | 129.7  |
| PA0537000 | P AE ILHA ANGAPIJO                                   | 0.0    | 0.0      | 0.0 | 0.0 | 753.6   | 131882.3   | 10.1  | 1764.4  |              |            | 763.7        | 133646.6   | 133646.6   | 95.9   |
| PA0538000 | P AE ILHA<br>URUBUQUARA<br>P AE ILHA<br>CONCEICAO DE | 44.3   | 8201.8   | 0.0 | 0.0 | 2310.8  | 426529.1   |       |         | 398.9        | 73812.8    | 2709.7       | 500341.9   | 508543.7   | 255.5  |
| PA0539000 | MOCAJUBA                                             | 23.1   | 4040.7   | 0.0 | 0.0 | 1266.9  | 221699.0   | 1.5   | 269.7   |              |            | 1268.4       | 221968.6   | 226009.4   | 239.8  |
| PA0540000 | P AE ILHA GRANDE<br>DE VISEU                         | 0.2    | 28.5     | 0.0 | 0.0 | 1140.7  | 199627.3   | 5.0   | 875.6   | 6.0          | 1053.9     | 1151.8       | 201556.8   | 201585.3   | 248.8  |
| PA0541000 | P AE ILHA TAUARE                                     | 6.0    | 1056.1   | 0.0 | 0.0 | 1819.6  | 318432.7   | 26.5  | 4643.8  | 3.5          | 609.9      | 1849.6       | 323686.3   | 324742.5   | 219.1  |
| PA0542000 | P AE ILHA CURUPIRA                                   | 0.0    | 0.0      | 0.0 | 0.0 | 951.9   | 166578.7   |       |         |              |            | 951.9        | 166578.7   | 166578.7   | 12.5   |
| PA0543000 | P AE ILHA TURUÇU                                     | 0.0    | 0.0      | 0.0 | 0.0 | 1804.8  | 315836.9   |       |         |              |            | 1804.8       | 315836.9   | 315836.9   | 142.0  |
| PA0544000 | P AE ILHA MACHADO                                    | 0.0    | 0.0      | 0.0 | 0.0 | 1905.9  | 333525.2   |       |         |              |            | 1905.9       | 333525.2   | 333525.2   | 51.4   |
| PA0555000 | P AE ILHA MACACAA                                    | 11.2   | 1964.8   | 0.0 | 0.0 | 6603.3  | 1155581.7  |       |         | 3.0          | 523.2      | 6606.3       | 1156104.9  | 1158069.8  | 187.2  |
| PA0556000 | P AE ILHA ACAJUI                                     | 13.1   | 2285.4   | 0.0 | 0.0 | 812.8   | 142241.3   |       |         |              |            | 812.8        | 142241.3   | 144526.7   | 58.0   |
| PA0557000 | P AE ILHA CUPIJO<br>MIRIM                            | 0.0    | 0.0      | 0.0 | 0.0 | 1307.7  | 228839.0   |       |         | 564.8        | 98841.1    | 1872.5       | 327680.1   | 327680.1   | 77.2   |

|           |                         |        |           |     |     |         |           |       |         |         |           |         |           |           |       |
|-----------|-------------------------|--------|-----------|-----|-----|---------|-----------|-------|---------|---------|-----------|---------|-----------|-----------|-------|
| PA0559000 | PA SOROROCA             | 583.3  | 107941.7  | 0.0 | 0.0 | 107.5   | 19676.2   | 194.8 | 35285.9 | 26.2    | 4851.5    | 328.5   | 59813.5   | 167755.2  |       |
| PA0560000 | PA CANDEUA              | 372.7  | 68888.5   | 0.0 | 0.0 | 225.6   | 40416.3   | 86.3  | 15122.4 | 7.9     | 1387.1    | 319.9   | 56925.8   | 125814.3  |       |
| PA0561000 | PA MARIAHI              | 2098.4 | 388043.2  | 0.0 | 0.0 | 755.6   | 139190.2  |       |         | 9.9     | 1829.7    | 765.5   | 141019.8  | 529063.0  |       |
| PA0562000 | PA CARLOS<br>LAMARCA    | 940.9  | 174117.5  | 0.0 | 0.0 | 2.1     | 391.7     |       |         | 4.0     | 737.0     | 6.1     | 1128.7    | 175246.2  |       |
| PA0563000 | PA SAO LOURENCO         | 804.6  | 146923.7  | 0.0 | 0.0 | 433.2   | 76736.0   |       |         | 13.6    | 2388.8    | 446.8   | 79124.8   | 226048.5  | 3.7   |
| PA0564000 | PA FORTALEZA            | 1049.2 | 190164.6  | 0.0 | 0.0 | 764.8   | 136239.7  |       |         | 62.4    | 11005.9   | 827.2   | 147245.6  | 337410.3  | 32.0  |
| PA0565000 | PA VALE DO<br>ARIACAU   | 6400.2 | 1184321.5 | 0.0 | 0.0 | 1678.1  | 310710.7  |       |         | 482.2   | 89360.2   | 2160.3  | 400070.9  | 1584392.4 |       |
| PA0567000 | PAE ILHA<br>JAPICHAUA   | 5421.3 | 978797.9  | 0.0 | 0.0 | 12910.9 | 2278818.8 |       |         | 29903.6 | 5286966.0 | 42814.5 | 7565784.8 | 8544582.7 | 663.4 |
| PA0569000 | PAE ILHA SETUBAL        | 0.0    | 0.0       | 0.0 | 0.0 | 170.4   | 31769.5   |       |         |         |           | 170.4   | 31769.5   | 31769.5   | 1.0   |
| PA0570000 | PAE ILHA<br>SOBERANA    | 0.0    | 0.0       | 0.0 | 0.0 | 294.7   | 54955.3   |       |         |         |           | 294.7   | 54955.3   | 54955.3   |       |
| PA0571000 | PAE ILHA<br>MUTUNQUARA  | 0.0    | 0.0       | 0.0 | 0.0 | 10154.9 | 1777105.7 |       |         | 5125.4  | 896950.4  | 15280.3 | 2674056.1 | 2674056.1 | 881.0 |
| PA0572000 | PAE ILHA ARANAI         | 114.9  | 20113.0   | 0.0 | 0.0 | 4900.7  | 857616.4  |       |         | 9568.2  | 1674427.4 | 14468.8 | 2532043.8 | 2552156.9 | 622.3 |
| PA0573000 | PAE ILHA<br>QUANGUERA   | 0.0    | 0.0       | 0.0 | 0.0 | 92.8    | 17304.8   |       |         | 17.1    | 3188.1    | 109.9   | 20492.9   | 20492.9   | 0.5   |
| PA0574000 | PAE ILHA BITUBA         | 0.0    | 0.0       | 0.0 | 0.0 | 112.7   | 21025.5   |       |         |         |           | 112.7   | 21025.5   | 21025.5   | 1.7   |
| PA0576000 | PAE ILHA CAPITEUA       | 0.0    | 0.0       | 0.0 | 0.0 | 101.3   | 17729.9   |       |         |         |           | 101.3   | 17729.9   | 17729.9   | 26.4  |
| PA0580000 | PAE ILHA<br>SOROROCA    | 21.9   | 3832.8    | 0.0 | 0.0 | 459.7   | 80453.8   |       |         | 23.6    | 4136.7    | 483.4   | 84590.5   | 88423.3   | 35.8  |
| PA0582000 | PAE ILHA PURURE         | 3135.8 | 559195.3  | 0.0 | 0.0 | 3648.6  | 640953.8  |       |         | 7851.7  | 1382205.5 | 11500.4 | 2023159.3 | 2582354.7 | 447.5 |
| PA0583000 | PAE ILHA MUTUTI         | 320.0  | 56005.6   | 0.0 | 0.0 | 20720.2 | 3626036.5 |       |         | 27502.7 | 4812965.1 | 48222.9 | 8439001.6 | 8495007.2 | 774.4 |
| PA0585000 | PA PAIXAO               | 2098.0 | 388249.9  | 0.0 | 0.0 | 8.4     | 1548.1    |       |         | 48.1    | 8897.6    | 56.4    | 10445.7   | 398695.6  |       |
| PA0586000 | PA GALILEIA             | 2981.8 | 551813.3  | 0.0 | 0.0 | 30.2    | 5582.5    |       |         | 27.2    | 5030.4    | 57.3    | 10612.9   | 562426.2  |       |
| PA0587000 | PA ALTO ALEGRE          | 1624.5 | 300639.0  | 0.0 | 0.0 | 33.9    | 6271.1    |       |         | 64.1    | 11859.4   | 98.0    | 18130.6   | 318769.6  |       |
| PA0588000 | PA JERICO               | 2887.5 | 534365.4  | 0.0 | 0.0 | 34.1    | 6305.2    |       |         | 38.0    | 7034.6    | 72.1    | 13339.8   | 547705.2  |       |
| PA0589000 | PA MACARANDUBA          | 1250.0 | 229952.5  | 0.0 | 0.0 | 2.1     | 374.5     |       |         | 11.9    | 2088.6    | 14.1    | 2463.1    | 232415.6  |       |
| PA0590000 | PAE ILHA<br>MARAJOZINHO | 18.7   | 3267.8    | 0.0 | 0.0 | 746.2   | 130582.2  |       |         | 667.5   | 116805.9  | 1413.6  | 247388.1  | 250655.9  | 236.8 |
| PA0591000 | PAE ILHA ARARAMA<br>I   | 248.5  | 43484.7   | 0.0 | 0.0 | 1909.1  | 334083.9  |       |         | 6475.9  | 1133282.4 | 8385.0  | 1467366.3 | 1510851.0 | 368.4 |
| PA0592000 | PAE ILHA CAJUUNA        | 105.4  | 18453.5   | 0.0 | 0.0 | 1654.8  | 289597.6  |       |         | 1143.2  | 200067.0  | 2798.1  | 489664.6  | 508118.1  | 308.6 |
| PA0593000 | PAE ILHA JURARA         | 0.0    | 0.0       | 0.0 | 0.0 | 1032.2  | 180634.2  |       |         | 1220.1  | 213513.6  | 2252.3  | 394147.8  | 394147.8  | 168.2 |
| PA0597000 | PAE ILHA QUATI          | 0.0    | 0.0       | 0.0 | 0.0 | 380.1   | 66522.1   |       |         |         |           | 380.1   | 66522.1   | 66522.1   | 19.2  |

|           |                                                                                                                                                    |          |            |     |     |         |            |         |           |           |            |           |            |            |        |
|-----------|----------------------------------------------------------------------------------------------------------------------------------------------------|----------|------------|-----|-----|---------|------------|---------|-----------|-----------|------------|-----------|------------|------------|--------|
| PA0598000 | P<br>A<br>E<br>I<br>L<br>H<br>A<br>P<br>E<br>R<br>I<br>Q<br>U<br>I<br>T<br>Ã<br>O                                                                  | 0.0      | 0.0        | 0.0 | 0.0 | 105.3   | 18433.6    |         |           |           | 105.3      | 18433.6   | 18433.6    | 9.1        |        |
| PA0599000 | P<br>A<br>E<br>I<br>L<br>H<br>A<br>P<br>R<br>O<br>V<br>I<br>D<br>E<br>N<br>C<br>I<br>A                                                             | 0.0      | 0.0        | 0.0 | 0.0 | 491.9   | 86081.2    |         | 14.2      | 2484.3    | 506.1      | 88565.5   | 88565.5    | 12.9       |        |
| PA0650000 | P<br>A<br>E<br>I<br>L<br>H<br>A<br>S<br>A<br>N<br>T<br>A<br>L<br>U<br>Z<br>I<br>A                                                                  | 0.0      | 0.0        | 0.0 | 0.0 | 1986.4  | 347612.5   |         | 138.4     | 24223.4   | 2124.8     | 371835.9  | 371835.9   | 28.4       |        |
| PA0651000 | P<br>A<br>E<br>I<br>L<br>H<br>A<br>B<br>U<br>I<br>U<br>S<br>S<br>U<br>D<br>O<br>A<br>T<br>A<br>T<br>A                                              | 0.0      | 0.0        | 0.0 | 0.0 | 676.0   | 118296.8   |         | 9.7       | 1698.4    | 685.7      | 119995.2  | 119995.2   | 51.2       |        |
| PA0652000 | P<br>A<br>E<br>I<br>L<br>H<br>A<br>C<br>I<br>P<br>O<br>T<br>E<br>U<br>A<br>P<br>A<br>E<br>I<br>L<br>H<br>A<br>B<br>O<br>M                          | 0.0      | 0.0        | 0.0 | 0.0 | 127.8   | 22365.6    |         |           |           | 127.8      | 22365.6   | 22365.6    | 14.6       |        |
| PA0653000 | S<br>U<br>C<br>E<br>S<br>S<br>O<br>P<br>A<br>E<br>I<br>L<br>H<br>A                                                                                 | 7.1      | 1240.8     | 0.0 | 0.0 | 704.8   | 123346.9   |         | 16.0      | 2795.7    | 720.8      | 126142.6  | 127383.3   | 15.8       |        |
| PA0655000 | P<br>A<br>E<br>I<br>L<br>H<br>A<br>C<br>A<br>M<br>A<br>L<br>E<br>O<br>E<br>S                                                                       | 0.0      | 0.0        | 0.0 | 0.0 | 2107.5  | 230860.0   | 1044.9  | 114454.4  | 326.2     | 35728.5    | 3478.6    | 381042.9   | 381042.9   | 332.1  |
| PA0656000 | P<br>A<br>E<br>I<br>L<br>H<br>A<br>P<br>O<br>A<br>M<br>P<br>E                                                                                      | 0.0      | 0.0        | 0.0 | 0.0 |         |            | 382.4   | 41884.4   |           |            | 382.4     | 41884.4    | 41884.4    | 239.3  |
| PA0657000 | P<br>A<br>E<br>I<br>L<br>H<br>A<br>C<br>R<br>A<br>J<br>U<br>R<br>U<br>P<br>A<br>E<br>I<br>L<br>H<br>A<br>I<br>T<br>A<br>B<br>O<br>C<br>A<br>I<br>I | 30.0     | 5587.1     | 0.0 | 0.0 | 206.3   | 38463.2    |         |           |           | 206.3      | 38463.2   | 44050.3    |            |        |
| PA0658000 | P<br>A<br>E<br>I<br>L<br>H<br>A<br>A<br>Z<br>E<br>I<br>T<br>E<br>P<br>A<br>E<br>I<br>L<br>H<br>A<br>S<br>A<br>N<br>T<br>A<br>C<br>R<br>U<br>Z      | 17.5     | 3060.9     | 0.0 | 0.0 | 300.3   | 52550.2    |         |           |           | 300.3      | 52550.2   | 55611.2    | 40.0       |        |
| PA0659000 | P<br>A<br>E<br>I<br>L<br>H<br>A<br>A<br>Z<br>E<br>I<br>T<br>E<br>P<br>A<br>E<br>I<br>L<br>H<br>A<br>S<br>A<br>N<br>T<br>A<br>C<br>R<br>U<br>Z      | 71.0     | 12425.5    | 0.0 | 0.0 | 75.1    | 13145.8    |         |           |           | 75.1       | 13145.8   | 25571.3    | 23.5       |        |
| PA0660000 | P<br>A<br>E<br>I<br>L<br>H<br>A<br>J<br>A<br>C<br>A<br>R<br>E<br>Z<br>I<br>N<br>H<br>O                                                             | 0.0      | 0.0        | 0.0 | 0.0 | 299.7   | 52443.5    |         |           |           | 299.7      | 52443.5   | 52443.5    | 38.2       |        |
| PA0661000 | P<br>A<br>E<br>I<br>L<br>H<br>A<br>A<br>R<br>A<br>J<br>A<br>P<br>A<br>N<br>E<br>M<br>A<br>I<br>I                                                   | 1281.9   | 224335.4   | 0.0 | 0.0 | 8546.8  | 1495685.7  |         | 19626.0   | 3434548.1 | 28172.8    | 4930233.8 | 5154569.2  | 2383.0     |        |
| PA0663000 | P<br>A<br>E<br>I<br>L<br>H<br>A<br>I<br>T<br>A<br>P<br>U<br>P<br>A<br>N<br>A                                                                       | 0.0      | 0.0        | 0.0 | 0.0 | 50.1    | 9338.3     |         | 6.0       | 1126.8    | 56.1       | 10465.1   | 10465.1    | 6.5        |        |
| PA0664000 | P<br>A<br>E<br>I<br>L<br>H<br>A<br>A<br>R<br>A<br>J<br>A<br>P<br>A<br>N<br>E<br>M<br>A<br>I<br>I                                                   | 0.0      | 0.0        | 0.0 | 0.0 | 157.7   | 29414.4    |         |           |           | 157.7      | 29414.4   | 29414.4    |            |        |
| PA0665000 | P<br>A<br>E<br>I<br>L<br>H<br>A<br>A<br>R<br>I<br>C<br>U<br>R<br>A<br>P<br>A<br>E<br>I<br>L<br>H<br>A<br>G<br>R<br>A<br>N<br>D<br>E                | 0.0      | 0.0        | 0.0 | 0.0 | 307.6   | 53825.4    |         |           |           | 307.6      | 53825.4   | 53825.4    | 86.3       |        |
| PA0666000 | D<br>E<br>G<br>U<br>R<br>U<br>P<br>A<br>P<br>A<br>E<br>I<br>L<br>H<br>A<br>S<br>A<br>N<br>T<br>A<br>B<br>A<br>R<br>B<br>A<br>R<br>A                | 586.6    | 102655.9   | 0.0 | 0.0 | 73060.7 | 12785627.9 | 1391.9  | 2435843.5 | 204287.8  | 35750357.3 | 291267.6  | 50971828.7 | 51074484.5 | 4337.5 |
| PA0667000 | P<br>A<br>E<br>I<br>L<br>H<br>A<br>G<br>U<br>R<br>U<br>P<br>A<br>I                                                                                 | 0.0      | 0.0        | 0.0 | 0.0 | 124.8   | 21839.3    |         |           | 805.5     | 140957.2   | 930.3     | 162796.6   | 162796.6   | 115.7  |
| PA0668000 | P<br>A<br>E<br>I<br>L<br>H<br>A<br>D<br>O<br>C<br>O<br>R<br>R<br>E                                                                                 | 0.0      | 0.0        | 0.0 | 0.0 | 3573.2  | 625302.4   |         | 2499.8    | 437456.4  | 6072.9     | 1062758.8 | 1062758.8  | 193.2      |        |
| PA0669000 | P<br>A<br>E<br>I<br>L<br>H<br>A<br>G<br>U<br>A<br>R<br>I<br>B<br>A<br>S                                                                            | 1680.3   | 299493.7   | 0.0 | 0.0 | 5481.3  | 960072.2   |         | 12591.4   | 2206048.8 | 18072.7    | 3166121.0 | 3465614.7  | 1143.0     |        |
| PA0679000 | P<br>A<br>E<br>I<br>L<br>H<br>A<br>N<br>A<br>Z<br>A<br>R<br>E                                                                                      | 1148.1   | 200925.5   | 0.0 | 0.0 | 4765.3  | 833927.3   |         | 7160.7    | 1253128.5 | 11926.0    | 2087055.8 | 2287981.3  | 201.7      |        |
| PA0680000 | P<br>A<br>E<br>I<br>L<br>H<br>A<br>P<br>I<br>C<br>M<br>O<br>N<br>T<br>E<br>A<br>L<br>E<br>G<br>R<br>E<br>P<br>A<br>N<br>O<br>V<br>O                | 267.2    | 46755.5    | 0.0 | 0.0 | 5996.1  | 1049314.9  |         | 5403.0    | 945530.8  | 11399.1    | 1994845.7 | 2041601.2  | 428.8      |        |
| SM0001000 | H<br>O<br>R<br>I<br>Z<br>O<br>N<br>T<br>E                                                                                                          | 214581.3 | 20842326.3 | 0.0 | 0.0 | 75732.5 | 10693291.0 | 6484.05 | 6409526.5 | 61393.7   | 10495120.1 | 201966.6  | 27597937.6 | 48440263.9 | 24.1   |
| SM0004000 | P<br>A<br>I<br>T<br>U<br>Q<br>U<br>I                                                                                                               | 7108.5   | 1232756.2  | 0.0 | 0.0 | 3299.6  | 587831.3   | 3.9     | 727.3     | 610.1     | 110166.6   | 3913.5    | 698725.1   | 1931481.3  |        |
| SM0005000 | P<br>A<br>S<br>U<br>R<br>U<br>B<br>I<br>M                                                                                                          | 5035.3   | 700552.9   | 0.0 | 0.0 | 4579.1  | 772453.2   | 6.8     | 238.5     | 6490.7    | 1174782.0  | 11076.6   | 1947473.7  | 2648026.6  | 1.0    |
| SM0006000 | P<br>A<br>C<br>R<br>I<br>S<br>T<br>A<br>L<br>I<br>N<br>O                                                                                           | 88800.3  | 16547444.0 | 0.0 | 0.0 | 0       | 21292380.5 |         |           | 203.6     | 37994.8    | 6         | 21330375.3 | 37877819.2 |        |
| SM0008000 |                                                                                                                                                    | 4963.8   | 919830.9   | 0.0 | 0.0 | 4010.2  | 745825.1   |         |           | 553.4     | 102906.8   | 4563.6    | 848731.8   | 1768562.8  |        |

|           |                      |         |           |     |     |         |            |       |         |         |            |         |            |            |        |
|-----------|----------------------|---------|-----------|-----|-----|---------|------------|-------|---------|---------|------------|---------|------------|------------|--------|
| SM0009000 | PA ASSURINI          | 26372.0 | 4870693.2 | 0.0 | 0.0 | 10738.5 | 1975501.7  | 546.5 | 95963.0 | 8929.1  | 1638935.3  | 20214.1 | 3710400.0  | 8581093.2  | 3153.9 |
| SM0010000 | PA RIO DO PEIXE      | 8082.9  | 1504085.8 | 0.0 | 0.0 | 14238.7 | 2653451.1  |       |         | 3391.1  | 632348.1   | 17629.8 | 3285799.2  | 4789885.0  |        |
| SM0011000 | PA RIO CUPARI        | 8960.7  | 1596340.6 | 0.0 | 0.0 | 21048.2 | 3826359.8  |       |         | 6714.5  | 1195383.5  | 27762.6 | 5021743.3  | 6618083.8  |        |
| SM0012000 | PA TAPAJÓS           | 6753.5  | 1253295.6 | 0.0 | 0.0 | 10671.4 | 1988261.2  |       |         | 4992.2  | 930768.5   | 15663.7 | 2919029.7  | 4172325.3  |        |
| SM0013000 | PA CAMPO VERDE       | 9540.1  | 1611587.9 | 0.0 | 0.0 | 536.2   | 88529.4    |       |         | 14351.2 | 2357823.2  | 14887.3 | 2446352.7  | 4057940.5  |        |
| SM0014000 | PA NOVA<br>FRONTEIRA | 8272.9  | 1370986.4 | 0.0 | 0.0 | 7896.2  | 1312826.4  |       |         |         |            | 7896.2  | 1312826.4  | 2683812.8  |        |
| SM0016000 | PA MOJU I E II       | 21262.6 | 3946555.3 | 0.0 | 0.0 | 19619.4 | 3653965.1  |       |         | 94005.1 | 17516136.8 | 5       | 21170101.9 | 25116657.3 |        |
| SM0019000 | PA UIRAPURU          | 13875.5 | 2354045.6 | 0.0 | 0.0 | 7817.9  | 1280259.8  |       |         | 273.0   | 44638.0    | 8090.9  | 1324897.8  | 3678943.4  |        |
| SM0020000 | PA TUTUÍ SUL         | 7440.8  | 1389787.9 | 0.0 | 0.0 | 10606.0 | 1982108.3  |       |         | 2274.2  | 425025.7   | 12880.2 | 2407134.0  | 3796921.9  |        |
| SM0021000 | PA GROTAO DA<br>ONCA | 2311.5  | 419758.5  | 0.0 | 0.0 | 431.1   | 74428.8    |       |         | 928.3   | 163750.1   | 1359.4  | 238178.9   | 657937.5   |        |
| SM0022000 | PA RIO TRAIRÃO       | 4293.9  | 796339.5  | 0.0 | 0.0 | 9912.3  | 1845167.9  |       |         | 1836.2  | 341222.4   | 11748.5 | 2186390.3  | 2982729.8  |        |
| SM0023000 | PA CANOÉ             | 5842.7  | 1088212.7 | 0.0 | 0.0 | 3165.6  | 590441.2   |       |         | 1672.4  | 312012.7   | 4838.0  | 902453.9   | 1990666.5  |        |
| SM0024000 | PA ARARAQUARA        | 1637.7  | 304943.0  | 0.0 | 0.0 | 1530.4  | 285352.0   |       |         | 1086.2  | 202542.8   | 2616.6  | 487894.8   | 792837.8   |        |
| SM0025000 | PA CRISTALINO II     | 2674.5  | 496371.7  | 0.0 | 0.0 | 3207.9  | 597536.5   |       |         | 335.8   | 62500.7    | 3543.8  | 660037.2   | 1156408.9  |        |
| SM0026000 | PA PILAO POENTE      | 7355.2  | 1279932.5 | 0.0 | 0.0 | 2300.5  | 393647.2   |       |         | 5014.6  | 850160.5   | 7315.1  | 1243807.7  | 2523740.2  |        |
| SM0027000 | PA SANTA JULIA       | 12016.9 | 2032221.8 | 0.0 | 0.0 | 10571.9 | 1840851.1  | 80.3  | 15002.7 |         |            | 10652.2 | 1855853.8  | 3888075.6  |        |
| SM0028000 | PA BRASIL NOVO       | 5352.4  | 997381.8  | 0.0 | 0.0 | 1764.6  | 329571.0   |       |         |         |            | 1764.6  | 329571.0   | 1326952.8  |        |
| SM0029000 | PA RIO BONITO        | 3822.1  | 710093.3  | 0.0 | 0.0 | 4270.1  | 794692.3   |       |         | 485.0   | 90648.1    | 4755.2  | 885340.4   | 1595433.7  |        |
| SM0030000 | PA BUERU             | 1005.0  | 186622.3  | 0.0 | 0.0 | 934.0   | 173996.2   |       |         | 1048.8  | 195226.2   | 1982.9  | 369222.3   | 555844.6   |        |
| SM0031000 | PA TAPERA VELHA      | 4035.4  | 749318.9  | 0.0 | 0.0 | 3228.2  | 601441.3   |       |         | 5374.7  | 1001362.7  | 8602.9  | 1602803.9  | 2352122.9  |        |
| SM0032000 | PA CORTA CORDA       | 8405.1  | 1562070.9 | 0.0 | 0.0 | 63226.5 | 11788755.2 |       |         | 6527.1  | 1216583.3  | 69753.6 | 13005338.4 | 14567409.3 | 12.2   |
| SM0033000 | PA CRUZEIRÃO         | 11264.3 | 1857206.4 | 0.0 | 0.0 | 22629.4 | 3704731.0  |       |         | 1421.4  | 232792.5   | 24050.7 | 3937523.4  | 5794729.8  |        |
| SM0034000 | PA SOCÓ I            | 13587.1 | 2310786.9 | 0.0 | 0.0 | 3533.0  | 655488.0   | 65.5  | 8812.1  | 5391.3  | 1002476.0  | 8989.8  | 1666776.0  | 3977563.0  | 493.4  |
| SM0035000 | PA PARAÍSO           | 4900.8  | 854747.5  | 0.0 | 0.0 | 25844.1 | 4729111.7  |       |         | 33865.8 | 6219795.7  | 59709.9 | 10948907.4 | 11803655.0 |        |
| SM0036000 | PA BOM JARDIM        | 52770.5 | 9805825.3 | 0.0 | 0.0 | 11700.4 | 2185398.4  |       |         | 28197.9 | 5266963.8  | 39898.2 | 7452362.3  | 17258187.6 |        |
| SM0037000 | PA RIO ARATAU        | 43760.4 | 8139823.5 | 0.0 | 0.0 | 1560.8  | 291364.2   |       |         | 24308.0 | 4541890.1  | 25868.8 | 4833254.3  | 12973077.8 |        |
| SM0038000 | PA JACARÉ            | 2237.9  | 418020.6  | 0.0 | 0.0 | 25099.0 | 4690557.6  |       |         |         |            | 25099.0 | 4690557.6  | 5108578.2  | 4.5    |
| SM0039000 | PA MIRITITUBA        | 10662.4 | 1962406.4 | 0.0 | 0.0 | 14406.5 | 2667962.7  |       |         | 229.3   | 42539.6    | 14635.8 | 2710502.2  | 4672908.6  |        |

|           |                                    |         |           |     |     |         |           |       |          |         |           |         |           |           |
|-----------|------------------------------------|---------|-----------|-----|-----|---------|-----------|-------|----------|---------|-----------|---------|-----------|-----------|
| SM0040000 | PA PILAO POENTE II<br>E III        | 6292.7  | 1091923.1 | 0.0 | 0.0 | 1998.9  | 337245.7  |       |          | 3304.2  | 555361.3  | 5303.1  | 892607.0  | 1984530.0 |
| SM0041000 | PA ALTO PARÁ                       | 1698.8  | 316201.9  | 0.0 | 0.0 | 42350.2 | 7897360.1 |       |          | 986.7   | 184004.9  | 43336.9 | 8081365.0 | 8397566.9 |
| SM0043000 | PA NOVA<br>ESPERANÇA               | 4476.1  | 682757.2  | 0.0 | 0.0 | 19.9    | 3519.1    |       |          | 28.0    | 5079.3    | 47.9    | 8598.4    | 691355.6  |
| SM0044000 | PA PLACAS                          | 11370.5 | 2076151.5 | 0.0 | 0.0 | 16641.2 | 3067683.5 |       |          | 5046.3  | 926111.1  | 21687.6 | 3993794.5 | 6069946.0 |
| SM0045000 | PA RIO DAS PEDRAS                  | 18702.3 | 3252949.2 | 0.0 | 0.0 | 15298.8 | 2708653.1 |       |          | 2953.7  | 512303.2  | 18252.5 | 3220956.2 | 6473905.4 |
| SM0046000 | PA CURUÁ-UNA                       | 3165.8  | 580768.5  | 0.0 | 0.0 | 7986.7  | 1473330.9 |       |          | 6073.0  | 1130619.0 | 14059.7 | 2603949.9 | 3184718.4 |
| SM0047000 | PA AREIA                           | 6321.8  | 1087751.7 | 0.0 | 0.0 | 13341.4 | 2332742.7 |       |          | 324.8   | 60632.0   | 13666.2 | 2393374.7 | 3481126.3 |
| SM0048000 | PA IGARAPE FLORES                  | 12645.9 | 2361065.3 | 0.0 | 0.0 | 9064.8  | 1693608.2 |       |          | 415.5   | 77642.9   | 9480.4  | 1771251.2 | 4132316.5 |
| SM0049000 | PA PENETECAUA                      | 12576.5 | 2347087.5 | 0.0 | 0.0 | 10131.9 | 1892149.8 |       |          | 36.5    | 6819.2    | 10168.4 | 1898969.0 | 4246056.6 |
| SM0050000 | PA ACARAI                          | 1144.2  | 213127.8  | 0.0 | 0.0 | 3826.9  | 714806.3  |       |          | 417.7   | 77983.9   | 4244.5  | 792790.2  | 1005918.0 |
| SM0051000 | PA LARANJAL                        | 8006.5  | 1492946.7 | 0.0 | 0.0 | 4718.4  | 878906.4  |       |          | 0.4     | 80.5      | 4718.9  | 878987.0  | 2371933.7 |
| SM0052000 | PA CAMPOS DE<br>PILAR              | 2867.1  | 378016.5  | 0.0 | 0.0 | 119.6   | 15007.1   | 182.1 | 14428.0  | 473.7   | 49598.9   | 775.3   | 79034.1   | 457050.6  |
| SM0053000 | PA YPIRANGA                        | 8789.6  | 1565317.2 | 0.0 | 0.0 | 22589.6 | 4022488.7 |       |          | 185.9   | 34536.0   | 22775.5 | 4057024.7 | 5622341.9 |
| SM0054000 | PA TRAJAP                          | 720.6   | 130236.6  | 0.0 | 0.0 | 2978.2  | 555015.6  | 1430. |          |         |           |         |           |           |
| SM0055000 | PA CAMPOS DO<br>POPO               | 6490.9  | 769129.1  | 0.0 | 0.0 | 1087.8  | 120313.1  | 0     | 262501.0 | 217.6   | 40650.2   | 4625.8  | 858166.8  | 988403.4  |
| SM0057000 | PA SÃO BENEDITO                    | 4366.1  | 810831.2  | 0.0 | 0.0 | 6184.1  | 1151268.4 |       |          | 499.1   | 59223.9   | 1586.9  | 179537.0  | 948666.1  |
| SM0058000 | PA RESSACA                         | 10696.5 | 1873659.8 | 0.0 | 0.0 | 5721.5  | 1001080.7 |       |          | 51.5    | 9598.7    | 6235.7  | 1160867.1 | 1971698.3 |
| SM0059000 | PA MORRO DAS<br>ARARAS             | 11082.6 | 1880757.4 | 0.0 | 0.0 | 3186.3  | 538160.6  |       |          | 9848.8  | 1718990.9 | 15570.3 | 2720071.5 | 4593731.4 |
| SM0060000 | PA ITAPUAMA                        | 8616.5  | 1610342.8 | 0.0 | 0.0 | 8596.1  | 1606521.2 | 87.6  | 16379.9  | 6270.3  | 1037081.9 | 9456.6  | 1575242.5 | 3455999.9 |
| SM0061000 | PA JURAUÁ                          | 1798.6  | 334926.0  | 0.0 | 0.0 | 1409.3  | 262820.0  |       |          | 1918.5  | 358553.0  | 10602.2 | 1981454.0 | 3591796.9 |
| SM0062000 | PA ARAPARI                         | 3248.0  | 574997.1  | 0.0 | 0.0 | 2569.1  | 436714.7  |       |          | 882.0   | 164472.5  | 2291.3  | 427292.5  | 762218.5  |
| SM0064000 | PA TUTUI NORTE                     | 2528.6  | 455955.6  | 0.0 | 0.0 | 21441.6 | 3974810.0 |       |          | 3082.8  | 514975.6  | 5651.9  | 951690.4  | 1526687.4 |
| SM0065000 | PA ÁREA CUMINÁ E<br>TROMBETAS      | 7508.4  | 1393908.1 | 0.0 | 0.0 | 14437.4 | 2691337.1 | 594.6 | 108000.0 | 1347.6  | 251251.3  | 16379.6 | 3050588.5 | 4444496.6 |
| SM0066000 | PDS IGARAPÉ DO<br>ANTA E CURUÁ UMA | 241.6   | 45058.0   | 0.0 | 0.0 | 2307.2  | 430245.4  |       |          | 8036.7  | 1498680.2 | 10343.9 | 1928925.6 | 1973983.6 |
| SM0067000 | PDS ANAPU I                        | 5461.2  | 955048.3  | 0.0 | 0.0 | 7138.7  | 1263237.5 |       |          | 11413.7 | 1999379.1 | 18552.3 | 3262616.7 | 4217665.0 |
| SM0069000 | PDS ANAPU III                      | 209.6   | 39072.4   | 0.0 | 0.0 | 12702.3 | 2368941.9 |       |          | 11345.0 | 2115911.5 | 24047.3 | 4484853.4 | 4523925.9 |
| SM0070000 | PDS ANAPU IV                       | 597.9   | 111602.2  | 0.0 | 0.0 | 3354.9  | 626801.2  |       |          | 2187.0  | 408565.8  | 5541.8  | 1035367.0 | 1146969.2 |
| SM0073000 | PDS CUPARI                         | 653.0   | 108263.6  | 0.0 | 0.0 | 14083.0 | 2502229.0 |       |          | 15263.1 | 2839522.6 | 29346.1 | 5341751.6 | 5450015.2 |

|           |                                 |          |            |     |     |         |            |       |          |         |            |         |            |            |        |
|-----------|---------------------------------|----------|------------|-----|-----|---------|------------|-------|----------|---------|------------|---------|------------|------------|--------|
| SM0074000 | PDS DIVINÓPOLIS                 | 2384.1   | 443975.1   | 0.0 | 0.0 | 22539.7 | 4144276.0  |       |          | 4562.4  | 845994.4   | 27102.1 | 4990270.3  | 5434245.4  |        |
| SM0075000 | PDS NOVO MUNDO                  | 778.0    | 144448.2   | 0.0 | 0.0 | 17040.3 | 3021546.8  |       |          | 12176.0 | 2181247.2  | 29216.4 | 5202794.0  | 5347242.2  |        |
| SM0099000 | PDS SERRA AZUL                  | 3821.6   | 669420.0   | 0.0 | 0.0 | 27944.5 | 4747584.9  | 4849. |          |         |            |         |            |            |        |
| SM0101000 | PDS ADEMIR<br>FEDERICCE         | 13141.3  | 2452042.7  | 0.0 | 0.0 | 214762. | 40059807.4 | 8     | 790365.7 | 42178.9 | 7477333.4  | 74973.2 | 13015284.0 | 13684703.9 |        |
| SM0104000 | PAE LAGO GRANDE                 | 115260.3 | 17882535.7 | 0.0 | 0.0 | 3       | 9430.      |       |          | 5246.4  | 978356.0   | 8       | 41038163.4 | 43490206.1 | 7.9    |
| SM0105000 | PA MARIPÁ                       | 6209.0   | 477517.1   | 0.0 | 0.0 | 2447.   | 10279921.2 | 3     | 445225.0 | 84265.8 | 15284787.2 | 3       | 26009933.4 | 43892469.1 | 11397. |
| SM0106000 | PA BAIXÃO                       | 6942.0   | 585163.6   | 0.0 | 0.0 | 1671.   | 226643.2   | 0     | 47116.2  | 99.2    | 8166.0     | 4788.7  | 281925.4   | 867089.0   | 336.3  |
| SM0107000 | PA MORIÇOCA                     | 624.3    | 57131.5    | 0.0 | 0.0 |         | 19858.7    |       |          | 11.0    | 849.5      | 261.1   | 20708.1    | 77839.6    |        |
| SM0108000 | PA VAI QUEM QUER                | 1151.4   | 132583.4   | 0.0 | 0.0 |         | 872.2      |       |          | 30.0    | 3279.8     | 902.2   | 116541.0   | 249124.5   |        |
| SM0109000 | PA MIRITI                       | 9679.9   | 1493195.4  | 0.0 | 0.0 |         | 2521.0     |       |          | 463.3   | 64289.0    | 2984.3  | 475852.6   | 1969048.0  |        |
| SM0110000 | PA TERRA PRETA E<br>OLHO D'ÁGUA | 2100.3   | 225591.6   | 0.0 | 0.0 |         | 1324.6     | 6.2   | 263.7    | 39.6    | 3206.5     | 1370.4  | 101276.5   | 326868.0   |        |
| SM0111000 | PA CURUMU                       | 1301.7   | 203294.3   | 0.0 | 0.0 |         | 135.0      | 94.0  | 14323.5  |         |            | 229.0   | 35521.1    | 238815.4   | 129.8  |
| SM0112000 | PA CAMBURÃO I                   | 11954.0  | 1746627.8  | 0.0 | 0.0 |         | 499.7      |       |          | 458.6   | 44403.6    | 958.3   | 94778.8    | 1841406.6  |        |
| SM0113000 | PAE JURUTI VELHO                | 23978.4  | 4447402.4  | 0.0 | 0.0 |         | 35282.5    | 312.3 | 21356.4  | 26168.3 | 4878665.5  | 61763.1 | 11475134.5 | 15922536.9 | 7313.8 |
| SM0114000 | PA URUCURITUBA                  | 5111.3   | 943578.1   | 0.0 | 0.0 |         | 7684.4     |       |          | 2349.1  | 437651.9   | 10033.5 | 1864608.1  | 2808186.2  | 50.0   |
| SM0115000 | PA SANTA CRUZ                   | 3874.5   | 717598.5   | 0.0 | 0.0 |         | 16267.8    |       |          | 1630.4  | 303978.1   | 17898.1 | 3334682.2  | 4052280.7  | 65.7   |
| SM0116000 | PA DANIEL DE<br>CARVALHO        | 5197.6   | 964788.7   | 0.0 | 0.0 |         | 13779.5    |       |          | 371.4   | 69265.5    | 14150.9 | 2634946.2  | 3599734.9  | 730.1  |
| SM0117000 | PA BRASÍLIA LEGAL               | 13738.9  | 2536178.2  | 0.0 | 0.0 |         | 10135.0    |       |          | 563.6   | 104883.8   | 10698.6 | 1976311.3  | 4512489.5  | 1279.0 |
| SM0118000 | PDS BRASÍLIA                    | 7617.1   | 1228482.5  | 0.0 | 0.0 |         | 11671.8    | 555.1 | 85930.6  |         |            | 12226.9 | 1956700.8  | 3185183.3  |        |
| SM0119000 | PA CAMBURÃO II                  | 2391.0   | 392366.8   | 0.0 | 0.0 |         | 526.7      |       |          | 1036.1  | 164851.9   | 1562.8  | 249640.8   | 642007.6   |        |
| SM0120000 | PA PORÃO                        | 2704.7   | 419074.2   | 0.0 | 0.0 |         | 37.4       | 45.9  | 7639.2   | 1.8     | 271.1      | 85.1    | 13606.6    | 432680.7   |        |
| SM0121000 | PAE MISSIONÁRIO<br>RUFINO       | 2157.3   | 286690.3   | 0.0 | 0.0 |         | 219.1      | 302.8 | 4377.8   | 3382.9  | 493485.4   | 3904.8  | 531029.9   | 817720.2   | 2.1    |
| SM0122000 | PAE VALE DO<br>SALGADO          | 12137.9  | 1636097.5  | 0.0 | 0.0 |         | 1216.7     | 751.3 | 14719.8  | 3574.1  | 534490.7   | 5542.2  | 746959.8   | 2383057.3  | 274.8  |
| SM0123000 | PDS MALOCA                      | 11304.5  | 1764420.2  | 0.0 | 0.0 |         | 8612.8     | 175.2 | 3355.7   | 11311.0 | 1822812.1  | 20099.0 | 3228147.9  | 4992568.2  | 153.0  |
| SM0125000 | PDS VALE DO<br>JAMANXIM         | 11829.2  | 1934182.8  | 0.0 | 0.0 |         | 76408.0    |       |          |         |            | 76408.0 | 12932441.2 | 14866624.0 | 584.0  |
| SM0126000 | PDS ÁGUA PRETA                  | 1941.5   | 358996.2   | 0.0 | 0.0 |         | 18426.8    | 14.7  | 2748.8   | 4471.8  | 825525.2   | 22913.3 | 4257816.3  | 4616812.6  |        |
| SM0127000 | PDS CASTANHEIRA                 | 1374.8   | 251140.1   | 0.0 | 0.0 |         | 2640.3     |       |          | 21800.1 | 4050590.8  | 24440.4 | 4537822.1  | 4788962.2  |        |
| SM0128000 | PA RENASCER                     | 3798.2   | 708574.2   | 0.0 | 0.0 |         | 1911.2     |       |          | 2870.2  | 535774.3   | 4781.5  | 892539.7   | 1601113.9  |        |

|           |                                 |         |            |     |     |          |            |        |           |          |            |           |            |            |            |        |
|-----------|---------------------------------|---------|------------|-----|-----|----------|------------|--------|-----------|----------|------------|-----------|------------|------------|------------|--------|
| SM0129000 | PA CUPUZAL                      | 4714.9  | 878525.1   | 0.0 | 0.0 | 288.0    | 53745.4    |        |           | 6299.5   | 1176670.5  | 6587.4    | 1230415.9  | 2108941.0  |            |        |
| SM0130000 | PA TERRA PARA PAZ               | 3702.1  | 690818.4   | 0.0 | 0.0 | 22684.3  | 4232522.9  |        |           | 37776.5  | 7048840.2  | 60460.9   | 11281363.1 | 11972181.5 |            |        |
| SM0131000 | PA JAMARY                       | 15271.5 | 2609756.0  | 0.0 | 0.0 | 11939.9  | 2183668.2  | 178.6  | 4054.8    | 4236.6   | 770091.6   | 16355.1   | 2957814.6  | 5567570.6  | 58.9       |        |
| SM0135000 | PA CRISTO REI                   | 7597.1  | 734290.5   | 0.0 | 0.0 |          |            |        |           |          |            | 0.0       | 0.0        | 734290.5   |            |        |
| SM0136000 | PA REPARTIMENTO                 | 23925.0 | 4433708.1  | 0.0 | 0.0 | 6995.1   | 1301800.5  |        |           | 6596.0   | 1228719.4  | 13591.1   | 2530519.9  | 6964228.0  |            |        |
| SM0137000 | PA MAMURU                       | 13962.7 | 2467199.4  | 0.0 | 0.0 | 2445.0   | 453540.8   | 531.6  | 26126.5   | 5060.2   | 916721.5   | 8036.8    | 1396388.8  | 3863588.1  | 121.0      |        |
| SM0138000 | PA CURUMU II                    | 13477.9 | 2497863.4  | 0.0 | 0.0 | 2778.3   | 516974.0   | 11.5   | 144.5     | 6328.4   | 1174011.9  | 9118.2    | 1691130.4  | 4188993.7  | 505.2      |        |
| SM0139000 | PA CIPOAL                       | 25998.3 | 4624690.6  | 0.0 | 0.0 | 6625.5   | 1155652.1  |        |           | 2238.2   | 378061.7   | 8863.8    | 1533713.8  | 6158404.4  |            |        |
| SM0140000 | PA VALE DO AÇAÍ                 | 14575.1 | 2530520.1  | 0.0 | 0.0 | 283.9    | 51639.0    | 185.4  | 2321.5    | 2991.7   | 537527.0   | 3461.0    | 591487.5   | 3122007.6  | 791.5      |        |
| SM0141000 | PAE EIXO FORTE                  | 8412.5  | 1254015.0  | 0.0 | 0.0 | 4411.7   | 766701.5   | 861.4  | 125547.0  | 3527.4   | 627718.1   | 8800.5    | 1519966.6  | 2773981.6  | 5.2        |        |
| SM0143000 | PA ITAQUERA I                   | 10368.5 | 1619906.8  | 0.0 | 0.0 | 14084.3  | 2514777.3  | 689.9  | 25019.1   | 7402.5   | 1350944.4  | 22176.7   | 3890740.9  | 5510647.7  | 459.8      |        |
| SM0144000 | PDS RENASCER II                 | 302.4   | 56397.4    | 0.0 | 0.0 | 27302.9  | 5091451.0  |        |           | 9781.6   | 1824078.8  | 37084.6   | 6915529.8  | 6971927.1  |            |        |
| SM0145000 | PA CURUÁ                        | 15154.5 | 2639073.3  | 0.0 | 0.0 | 47926.4  | 8532111.9  | 1291   |           | 325079.0 | 12777.6    | 2286276.0 | 73623.1    | 11143467.0 | 13782540.3 | 4935.3 |
| SM0146000 | PDS PARAÍSO                     | 3560.7  | 455786.8   | 0.0 | 0.0 | 94882.3  | 14352247.3 | 2748   | 1681293.9 | 26211.8  | 3866461.2  | 148583.9  | 19900002.4 | 20355789.2 | 840.4      |        |
| SM0147000 | PA VIRA VOLTA                   | 1765.0  | 271968.3   | 0.0 | 0.0 | 1161.9   | 199367.2   | 3079.9 | 275214.9  | 462.2    | 84424.2    | 4704.0    | 559006.3   | 830974.7   | 1184.6     |        |
| SM0148000 | PA ACOMEC                       | 1799.3  | 334772.3   | 0.0 | 0.0 | 5365.2   | 1001714.2  | 3494.4 | 628859.0  | 1308.0   | 244336.5   | 10167.5   | 1874909.8  | 2209682.1  | 2650.2     |        |
| SM0149000 | PDS LIBERDADE                   | 64548.0 | 12037513.7 | 0.0 | 0.0 | 104698.1 | 19561487.7 |        |           | 74516.6  | 13925343.4 | 179214.7  | 33486831.1 | 45524344.8 | 99.9       |        |
| SM0150000 | PDS NELSON DE OLIVEIRA          | 890.6   | 145745.0   | 0.0 | 0.0 | 3643.7   | 594805.2   | 2459.5 |           |          |            | 3643.7    | 594805.2   | 740550.3   | 84.1       |        |
| SM0151000 | PDS TERRA NOSSA                 | 40063.4 | 6858545.0  | 0.0 | 0.0 | 107269.3 | 18895218.7 | 2459.5 | 454222.3  |          |            | 109728.8  | 19349441.0 | 26207986.1 |            |        |
| SM0153000 | PAE REGIÃO DO CUÇARI            | 9708.8  | 1784288.7  | 0.0 | 0.0 | 16373.5  | 3010909.6  | 13.1   | 2424.5    | 2641.3   | 488528.0   | 19028.0   | 3501862.1  | 5286150.7  | 382.8      |        |
| SM0154000 | PDS MÁRIO BRAULE PINTO DA SILVA | 0.0     | 0.0        | 0.0 | 0.0 | 4868.4   | 907851.2   |        |           | 2145.2   | 400038.6   | 7013.6    | 1307889.8  | 1307889.8  |            |        |
| SM0155000 | PDS ESPERANÇA DO TRAIRÃO        | 6100.5  | 1133334.3  | 0.0 | 0.0 | 18497.5  | 3449211.9  |        |           | 197.4    | 36890.4    | 18694.9   | 3486102.4  | 4619436.6  |            |        |
| SM0156000 | PDS NOVA UNIÃO                  | 7818.9  | 1444756.0  | 0.0 | 0.0 | 3662.0   | 673375.6   |        |           | 162.7    | 30107.4    | 3824.7    | 703483.0   | 2148239.0  | 11.5       |        |
| SM0157000 | PA ARIXI                        | 1104.9  | 185218.7   | 0.0 | 0.0 | 4641.5   | 797408.2   |        |           | 9.3      | 1690.9     | 4650.8    | 799099.0   | 984317.7   |            |        |
| SM0162000 | PAE CUÇARU                      | 447.2   | 5598.5     | 0.0 | 0.0 | 340.9    | 4268.1     | 264.2  | 3307.6    | 4.7      | 59.3       | 609.8     | 7635.0     | 13233.5    | 126.8      |        |
| SM0163000 | PAE ILHAS REUNIDAS              | 0.0     | 0.0        | 0.0 | 0.0 |          |            | 598.0  | 7487.0    |          |            | 598.0     | 7487.0     | 7487.0     | 1793.7     |        |
| SM0164000 | PACOVAL/PRACOBAL                | 0.0     | 0.0        | 0.0 | 0.0 |          |            | 1523.2 | 19070.3   |          |            | 1523.2    | 19070.3    | 19070.3    | 800.9      |        |

|           |                            |         |           |     |     |          |            |        |          |          |            |          |            |            |        |
|-----------|----------------------------|---------|-----------|-----|-----|----------|------------|--------|----------|----------|------------|----------|------------|------------|--------|
| SM0165000 | PAE NAZARÉ                 | 1051.7  | 28138.3   | 0.0 | 0.0 | 383.3    | 4799.0     | 3372.7 | 56693.6  | 50.3     | 630.2      | 3806.3   | 62122.7    | 90261.0    | 111.4  |
| SM0166000 | PAE CURRALINHO             | 0.0     | 0.0       | 0.0 | 0.0 |          |            | 1015.6 |          |          |            | 1015.6   | 12714.9    | 12714.9    | 61.0   |
| SM0167000 | PAE IGARAPE DO CUÇARI      | 0.0     | 0.0       | 0.0 | 0.0 | 4.9      | 60.8       | 596.0  | 7462.1   | 3.2      | 40.0       | 604.1    | 7562.9     | 7562.9     | 0.2    |
| SM0168000 | PAE CUIEIRAS               | 0.0     | 0.0       | 0.0 | 0.0 |          |            | 257.6  | 3225.3   |          |            | 257.6    | 3225.3     | 3225.3     | 79.0   |
| SM0169000 | PAE COSTA DO AMAZONAS      | 41.7    | 521.9     | 0.0 | 0.0 | 9.7      | 121.6      | 1196.5 | 14980.2  | 3.5      | 43.5       | 1209.7   | 15145.3    | 15667.2    | 266.1  |
| SM0170000 | PAE ARITAPERA              | 0.0     | 0.0       | 0.0 | 0.0 | 4.5      | 55.8       | 9514.8 | 119125.6 |          |            | 9519.3   | 119181.4   | 119181.4   | 3      |
| SM0171000 | PA ANAPUZINHO              | 8890.6  | 1653500.2 | 0.0 | 0.0 | 3143.2   | 586953.2   |        |          | 6105.6   | 1140304.3  | 9248.8   | 1727257.4  | 3380757.6  |        |
| SM0172000 | PDS SANTA CLARA            | 783.0   | 131561.1  | 0.0 | 0.0 | 23376.2  | 4188208.9  |        |          | 17.9     | 3034.1     | 23394.1  | 4191243.1  | 4322804.2  |        |
| SM0173000 | PAE PIAPÓ                  | 0.0     | 0.0       | 0.0 | 0.0 |          |            | 400.4  | 5013.1   |          |            | 400.4    | 5013.1     | 5013.1     | 24.7   |
| SM0174000 | PAE SÃO DIOGO              | 81.7    | 1023.4    | 0.0 | 0.0 |          |            | 694.5  | 8695.1   |          |            | 694.5    | 8695.1     | 9718.5     | 12.1   |
| SM0175000 | PDS LIBERDADE I            | 15649.6 | 2920392.6 | 0.0 | 0.0 | 238119.5 | 44424275.3 |        |          | 197623.2 | 36868468.4 | 435742.7 | 81292743.7 | 84213136.3 | 8.5    |
| SM0176000 | PAE URUCURITUBA            | 0.0     | 0.0       | 0.0 | 0.0 |          |            | 2873.2 | 35972.8  |          |            | 2873.2   | 35972.8    | 35972.8    | 0      |
| SM0177000 | PDS HORIZONTE NOVO         | 1449.4  | 270288.6  | 0.0 | 0.0 | 10116.3  | 1863101.8  | 9.7    | 1800.8   | 10075.6  | 1808673.8  | 20201.6  | 3673576.5  | 3943865.1  | 453.2  |
| SM0179000 | PAE SALVAÇÃO               | 0.0     | 0.0       | 0.0 | 0.0 |          |            | 1015.7 | 127176.3 |          |            | 1015.7   | 127176.3   | 127176.3   | 7616.2 |
| SM0180000 | PAE ATUMÃ                  | 0.0     | 0.0       | 0.0 | 0.0 | 5.9      | 73.6       | 1354.6 | 169598.7 | 0.1      | 1.1        | 13552.2  | 169673.3   | 169673.3   | 2      |
| SM0181000 | PA MACANÃ I                | 3484.7  | 584402.8  | 0.0 | 0.0 | 1044.6   | 190666.3   |        |          | 21572.9  | 3706099.3  | 22617.5  | 3896765.5  | 4481168.3  |        |
| SM0182000 | PA MACANÃ II               | 2817.2  | 488987.0  | 0.0 | 0.0 | 19422.1  | 3505848.2  |        |          | 9172.5   | 1642629.6  | 28594.6  | 5148477.8  | 5637464.8  |        |
| SM0183000 | PDS ITATA                  | 5732.5  | 952527.3  | 0.0 | 0.0 | 68669.6  | 11282255.7 |        |          | 30882.9  | 5168710.2  | 99552.6  | 16450965.9 | 17403493.3 |        |
| SM0185000 | PAE MADALENA               | 0.0     | 0.0       | 0.0 | 0.0 |          |            | 9907.7 | 124044.1 |          |            | 9907.7   | 124044.1   | 124044.1   | 4968.6 |
| SM0186000 | PAE TAPARÁ                 | 278.1   | 6044.2    | 0.0 | 0.0 | 646.7    | 11404.4    | 6072.8 | 76031.5  | 100.5    | 2481.2     | 6820.0   | 89917.1    | 95961.3    | 3236.5 |
| SM0187000 | PAC ARAIPACUPU             | 17114.7 | 3144973.8 | 0.0 | 0.0 | 12658.7  | 2311618.4  |        |          | 461.1    | 84897.8    | 13119.8  | 2396516.2  | 5541490.0  | 459.2  |
| SM0188000 | PDS NOVA BRASILIA II       | 1286.8  | 238936.6  | 0.0 | 0.0 | 3907.0   | 728556.7   |        |          | 502.4    | 93690.7    | 4409.4   | 822247.5   | 1061184.1  |        |
| SM0189000 | PA NOSSA SENHORA DE FATIMA | 1069.2  | 198299.1  | 0.0 | 0.0 | 3115.2   | 580103.1   |        |          | 56.0     | 10390.8    | 3171.3   | 590493.9   | 788793.0   |        |
| SM0190000 | PA RIO CIGANO              | 794.3   | 146438.7  | 0.0 | 0.0 | 1406.2   | 249673.5   |        |          |          |            | 1406.2   | 249673.5   | 396112.2   |        |
| SM0191000 | PDS ÁGUA AZUL              | 6777.6  | 1190631.3 | 0.0 | 0.0 | 22915.3  | 3809408.7  | 7.2    | 1174.0   |          |            | 22922.5  | 3810582.8  | 5001214.1  | 207.6  |
| SM0192000 | PDS BOA VISTA DO CARACOL   | 3195.0  | 596568.1  | 0.0 | 0.0 | 19540.5  | 3651600.2  |        |          | 18.2     | 3407.3     | 19558.7  | 3655007.5  | 4251575.6  |        |
| SM0193000 | PAC NOVA ALTAMIRA          | 1498.2  | 109288.4  | 0.0 | 0.0 | 283.1    | 7601.3     | 1064.9 | 37044.5  | 48.8     | 1182.5     | 1396.7   | 45828.3    | 155116.7   | 11.5   |



|           |                                    |        |           |     |     |         |           |                |          |         |           |         |           |           |                  |
|-----------|------------------------------------|--------|-----------|-----|-----|---------|-----------|----------------|----------|---------|-----------|---------|-----------|-----------|------------------|
| SM0194000 | PAC CAUÇU B E<br>BALANÇÁ           | 1734.2 | 131495.6  | 0.0 | 0.0 | 652.5   | 27315.4   | 1176.<br>6     | 70612.6  | 52.1    | 4021.4    | 1881.2  | 101949.5  | 233445.0  |                  |
| SM0195000 | PÁE PARANA DE<br>BAIXO             | 0.0    | 0.0       | 0.0 | 0.0 |         |           | 5257.<br>4     | 65822.7  |         |           | 5257.4  | 65822.7   | 65822.7   | 3683.5           |
| SM0196000 | PÁE TRES ILHAS                     | 0.0    | 0.0       | 0.0 | 0.0 |         |           | 7407.<br>2     | 92737.9  |         |           | 7407.2  | 92737.9   | 92737.9   | 4307.5           |
| SM0197000 | PÁE MARIA TEREZA                   | 27.1   | 4593.1    | 0.0 | 0.0 |         |           | 641.3<br>1177  | 8029.6   | 137.9   | 3312.3    | 779.3   | 11342.0   | 15935.1   | 620.7            |
| SM0198000 | PÁE COSTA<br>FRONTEIRA             | 0.0    | 0.0       | 0.0 | 0.0 |         |           | 1.4<br>2535.   | 147377.6 |         |           | 11771.4 | 147377.6  | 147377.6  | 3903.8<br>12059. |
| SM0199000 | PÁE PARU                           | 0.0    | 0.0       | 0.0 | 0.0 |         |           | 0              | 31738.4  |         |           | 2535.0  | 31738.4   | 31738.4   | 3                |
| SM0200000 | PÁE CACOAL<br>GRANDE               | 0.0    | 0.0       | 0.0 | 0.0 |         |           | 9013.<br>1     | 112843.7 |         |           | 9013.1  | 112843.7  | 112843.7  | 613.3            |
| SM0201000 | PÁE SAO PEDRO                      | 0.0    | 0.0       | 0.0 | 0.0 |         |           | 3764.<br>4     | 48087.1  |         |           | 3764.4  | 48087.1   | 48087.1   | 5604.5           |
| SM0203000 | PÁE PAITUNA                        | 108.4  | 1356.8    | 0.0 | 0.0 | 43.1    | 539.8     | 575.2          | 7202.0   |         |           | 618.4   | 7741.8    | 9098.6    | 1828.4           |
| SM0204000 | PÁE REGIAO DOS<br>LAGOS            | 512.1  | 27407.7   | 0.0 | 0.0 | 210.3   | 7511.9    | 275.6<br>1641. | 3450.4   | 0.1     | 1.6       | 486.0   | 10964.0   | 38371.7   | 107.6            |
| SM0205000 | PÁE ACARA-AÇU                      | 0.0    | 0.0       | 0.0 | 0.0 |         |           | 5              | 20551.7  |         |           | 1641.5  | 20551.7   | 20551.7   | 731.1            |
| SM0206000 | PAC BELA TERRA I                   | 6114.5 | 1133838.3 | 0.0 | 0.0 | 2930.7  | 544921.9  |                |          | 1810.2  | 337080.5  | 4740.9  | 882002.4  | 2015840.7 |                  |
| SM0207000 | PAC BELA TERRA II                  | 8301.3 | 1540965.9 | 0.0 | 0.0 | 1275.3  | 237142.0  |                |          | 1417.0  | 263899.6  | 2692.3  | 501041.6  | 2042007.6 |                  |
| SM0208000 | PDS ARTHUR                         | 1945.6 | 362238.1  | 0.0 | 0.0 | 506.2   | 94361.2   |                |          | 20257.8 | 3777613.7 | 20764.0 | 3871974.9 | 4234213.0 |                  |
| SM0209000 | PDS AVELINO                        | 1278.8 | 238284.3  | 0.0 | 0.0 | 955.5   | 178184.1  |                |          | 19427.5 | 3622777.5 | 20383.0 | 3800961.6 | 4039246.0 |                  |
| SM0210000 | RIBEIRO<br>PÁE PARANA DONA<br>ROSA | 0.0    | 0.0       | 0.0 | 0.0 |         |           | 1875<br>1.9    | 234773.4 |         |           | 18751.9 | 234773.4  | 234773.4  | 3380.5           |
| SM0211000 | PÁE SANTA RITA                     | 0.0    | 0.0       | 0.0 | 0.0 |         |           | 4717.<br>0     | 59057.1  |         |           | 4717.0  | 59057.1   | 59057.1   | 7248.2           |
| SM0212000 | PÁE VALHA-ME<br>DEUS               | 0.0    | 0.0       | 0.0 | 0.0 |         |           | 1900.<br>0     | 23788.1  |         |           | 1900.0  | 23788.1   | 23788.1   | 1579.6<br>14408. |
| SM0213000 | PÁE SALÉ                           | 1013.3 | 24955.1   | 0.0 | 0.0 | 39.8    | 725.0     | 1131<br>1.0    | 177982.5 | 310.6   | 5775.5    | 11661.3 | 184483.0  | 209438.1  | 2                |
| SM0214000 | PÁE BALAIO                         | 342.3  | 61307.0   | 0.0 | 0.0 | 36.8    | 6840.8    | 6868.<br>9     | 116222.9 | 3.6     | 669.8     | 6909.3  | 123733.6  | 185040.6  | 5959.5           |
| SM0215000 | PDS MÃE<br>MENININHA               | 3823.4 | 623392.5  | 0.0 | 0.0 | 15004.3 | 2445467.1 | 21.2           | 3460.2   |         |           | 15025.6 | 2448927.3 | 3072319.8 |                  |
| SM0216000 | PDS ESPERANÇÁ                      | 2020.4 | 329267.5  | 0.0 | 0.0 | 15989.5 | 2605820.7 |                |          |         |           | 15989.5 | 2605820.7 | 2935088.2 |                  |
| SM0217000 | PA ESPERANÇÁ                       | 8065.8 | 1324421.4 | 0.0 | 0.0 | 6408.6  | 1047127.0 | 451.3          | 74226.2  |         |           | 6859.8  | 1121353.2 | 2445774.5 | 26.8             |
| SM0218000 | PAC ANANIZAL                       | 1026.7 | 190287.5  | 0.0 | 0.0 | 301.2   | 56125.1   |                |          | 1120.6  | 208780.8  | 1421.7  | 264905.9  | 455193.3  |                  |
| SM0219000 | PAC ITAPECURU                      | 1848.4 | 323930.9  | 0.0 | 0.0 | 624.7   | 116133.9  |                |          | 2248.7  | 414864.1  | 2873.4  | 530998.0  | 854928.9  | 35.7             |
| SM0220000 | PAC IRIPIXI                        | 1379.3 | 255636.1  | 0.0 | 0.0 | 58.1    | 10794.8   |                |          | 995.5   | 185378.6  | 1053.6  | 196173.4  | 451809.5  | 2.5              |
| SM0221000 | PAC MONTE MURIA                    | 2086.6 | 387742.6  | 0.0 | 0.0 | 1210.3  | 225519.6  |                |          | 1555.7  | 289962.1  | 2766.0  | 515481.7  | 903224.3  |                  |

|           |                                                                |         |           |     |     |         |            |        |          |          |           |           |            |            |
|-----------|----------------------------------------------------------------|---------|-----------|-----|-----|---------|------------|--------|----------|----------|-----------|-----------|------------|------------|
| SM0222000 | PAE ARAMANAÍ                                                   | 1885.1  | 349569.3  | 0.0 | 0.0 | 1347.0  | 250574.7   |        | 99.9     | 18596.2  | 1446.8    | 269170.9  | 618740.3   | 0.0        |
| SM0223000 | PAE PINDOBAL                                                   | 1639.6  | 303651.5  | 0.0 | 0.0 | 3862.9  | 718620.4   |        | 2544.9   | 473953.0 | 6407.8    | 1192573.4 | 1496224.9  | 55.1       |
| SM0224000 | PAE NHAMUNDA                                                   | 2.5     | 383.9     | 0.0 | 0.0 |         |            | 5683.3 |          |          |           |           |            |            |
| SM0225000 | PAE CACHOERY                                                   | 6.5     | 1145.1    | 0.0 | 0.0 |         |            | 3      | 75345.4  |          | 5683.3    | 75345.4   | 75729.3    | 6207.4     |
| SM0226000 | PAE ITUQUI                                                     | 2993.2  | 37504.5   | 0.0 | 0.0 | 1200.3  | 15211.3    | 1034   | 129495.1 | 86.5     | 1083.6    | 10429.6   | 130578.6   | 26271.0    |
| SM0227000 | PAE CHICANTÃ<br>PAE NOSSA<br>SENHORA DO<br>PERPÉTUO<br>SOCORRO | 70.9    | 10862.5   | 0.0 | 0.0 | 44.4    | 8264.2     | 2324.2 | 33202.4  | 133.4    | 1669.6    | 3657.9    | 50083.3    | 14334.7    |
| SM0228000 | PAE ANEMA                                                      | 0.0     | 0.0       | 0.0 | 0.0 | 0.0     | 0.4        | 6883.8 | 380316.7 | 81.0     | 14321.2   | 7009.2    | 402902.2   | 413764.7   |
| SM0229000 | PAE ANEMA                                                      | 0.0     | 0.0       | 0.0 | 0.0 |         |            | 3297.6 | 41286.2  | 0.0      | 0.1       | 3297.7    | 41286.8    | 1944.3     |
| SM0230000 | PAE JACARECAPÁ                                                 | 945.5   | 121517.6  | 0.0 | 0.0 | 239.5   | 22889.3    | 2471.4 | 30941.3  |          |           | 2471.4    | 30941.3    | 50.5       |
| SM0231000 | PAE JAQUARÁ                                                    | 1533.6  | 221440.0  | 0.0 | 0.0 | 281.5   | 40267.4    | 4      | 30941.3  |          |           | 2471.4    | 30941.3    | 50.5       |
| SM0232000 | PAE ALDEIA                                                     | 2329.8  | 318226.3  | 0.0 | 0.0 | 312.5   | 33456.4    | 345.7  | 4328.1   |          | 658.2     | 37784.5   | 356010.8   | 1096.3     |
| SM0233000 | PAC BOM SOSSEGO<br>PA PARAISO DO<br>NORTE                      | 28038.1 | 4947118.8 | 0.0 | 0.0 | 27292.4 | 5053528.1  |        |          | 31529.3  | 5834179.6 | 58821.8   | 10887707.6 | 15834826.4 |
| SM0234000 | PAC SÃO SEBASTIÃO<br>DO TUTUÍ                                  | 15382.8 | 2869782.7 | 0.0 | 0.0 | 91034.2 | 16986489.6 |        |          | 6552.7   | 1222359.1 | 97586.9   | 18208848.7 | 21078631.4 |
| SM0235000 | PAC NOVA UNIÃO                                                 | 1762.9  | 327425.1  | 0.0 | 0.0 | 33999.3 | 6328857.2  |        |          | 4065.0   | 758173.2  | 38064.3   | 7087030.4  | 7414455.5  |
| SM0236000 | PDS OURO BRANCO<br>PAC OURO BRANCO<br>I                        | 3796.9  | 705320.7  | 0.0 | 0.0 | 25455.3 | 4745930.1  |        |          | 2350.1   | 438024.9  | 27805.4   | 5183955.0  | 5889275.8  |
| SM0237000 | PDS OURO BRANCO<br>PAC OURO BRANCO<br>II                       | 5973.5  | 1114460.8 | 0.0 | 0.0 | 43927.5 | 8195611.8  |        |          | 4675.6   | 872189.6  | 48603.1   | 9067801.3  | 10182262.1 |
| SM0238000 | PDS LARANJAL                                                   | 3955.0  | 737724.0  | 0.0 | 0.0 | 35641.3 | 6647933.4  |        |          | 211.2    | 39384.4   | 35852.5   | 6687317.8  | 7425041.9  |
| SM0239000 | PDS PIMENTAL                                                   | 2534.2  | 473360.7  | 0.0 | 0.0 | 33436.9 | 6240984.4  |        |          | 1022.0   | 190720.3  | 34459.0   | 6431704.6  | 6905065.4  |
| SM0241000 | PDS IRMÃ DOROTY                                                | 2369.7  | 442185.4  | 0.0 | 0.0 | 31678.5 | 5913000.3  |        |          |          |           | 31678.5   | 5913000.3  | 6355185.7  |
| SM0242000 | PEAEX ARUA<br>PEAEX VISTA<br>ALEGRE                            | 1555.7  | 263116.2  | 0.0 | 0.0 | 4650.0  | 773520.4   |        |          | 21.7     | 3600.8    | 4671.7    | 777121.2   | 1040237.3  |
| SM0243000 | PEAEX ARUA<br>PEAEX VISTA<br>ALEGRE                            | 2568.7  | 479007.9  | 0.0 | 0.0 | 25308.6 | 4719544.6  |        |          | 2630.4   | 490519.5  | 27939.0   | 5210064.1  | 5689072.0  |
| SM0244000 | PAE CURUÁ II                                                   | 1645.9  | 305072.7  | 0.0 | 0.0 | 15501.0 | 2888410.8  |        |          | 6907.5   | 1285353.3 | 22408.5   | 4173764.1  | 4478836.8  |
| SM0245000 | PAE CURUÁ II                                                   | 856.2   | 158575.2  | 0.0 | 0.0 | 4574.2  | 850562.2   |        |          | 290.5    | 54054.0   | 4864.6    | 904616.2   | 1063191.4  |
| SM0246000 | PEAEX MAJARI<br>PEAEX<br>CURUMUCURI                            | 5857.6  | 1065977.0 | 0.0 | 0.0 | 31081.0 | 5688160.7  | 203.3  | 27497.1  | 7384.8   | 1345105.4 | 38669.0   | 7060763.2  | 8126740.2  |
| SM0247000 | PEAEX MAJARI<br>PEAEX<br>CURUMUCURI                            | 1867.2  | 283528.3  | 0.0 | 0.0 | 17608.8 | 2993558.5  | 4231.8 | 34226.5  | 18699.8  | 2816074.3 | 36933.7   | 5843859.3  | 6127387.6  |
| SM0248000 | PEAEX MAJARI<br>PEAEX<br>CURUMUCURI                            | 43265.8 | 6659041.6 | 0.0 | 0.0 | 34304.9 | 6346381.3  | 8      | 298527.2 | 39110.9  | 7186358.1 | 77647.6   | 13831266.5 | 20490308.1 |

|                 |                                          |           |             |     |     |                    |                         |               |                      |                |             |                    |              |              |                |
|-----------------|------------------------------------------|-----------|-------------|-----|-----|--------------------|-------------------------|---------------|----------------------|----------------|-------------|--------------------|--------------|--------------|----------------|
| SM0255000       | PEAS<br>REPARTIMENTO<br>PEAEX MARIAZINHA | 227.6     | 42297.1     | 0.0 | 0.0 | 2305.2             | 429040.4                |               |                      | 841.2          | 156703.2    | 3146.4             | 585743.7     | 628040.8     |                |
| SM0256000       | ARACATI<br>PEAEX PRUDENTE                | 410.6     | 76530.1     | 0.0 | 0.0 | 8355.2             | 1557671.6               |               |                      | 1556.1         | 290041.1    | 9911.3             | 1847712.7    | 1924242.8    |                |
| SM0259000       | MONTE SINAI<br>PAE MONTANHA E            | 922.2     | 171631.4    | 0.0 | 0.0 | 1436.9             | 267809.5                |               |                      | 1927.4         | 359349.2    | 3364.3             | 627158.7     | 798790.1     | 46.4           |
| SM0260000       | MANGABAL                                 | 643.7     | 119658.8    | 0.0 | 0.0 | 53120.4<br>4671760 | 9907400.7<br>835805342. | 308.1<br>4794 | 57573.5<br>31990533. | 54.4<br>245889 | 9990.4      | 53482.8<br>7610050 | 9974964.6    | 10094623.4   | 346.5<br>31642 |
|                 | Total in Pará                            | 5467122.2 | 954645936.1 | 0.0 | 0.0 | .3                 | 7                       | 00.3          | 6                    | 0.0            | 441743939.6 | .6                 | 1309539815.9 | 2264185752.0 | 4.7            |
| <b>RONDÔNIA</b> |                                          |           | 0.0         | 0.0 | 0.0 |                    |                         |               |                      |                |             | 0.0                | 0.0          | 0.0          |                |
| RO0006000       | PIC OURO PRETO<br>PIC Pe.ADOLPHO         | 398342.7  | 66820256.7  | 0.0 | 0.0 | 38432.5            | 6392530.3               | 1552.<br>6    | 279164.3             | 10.1           | 1645.7      | 39995.2            | 6673340.3    | 73493597.1   | 925.6          |
| RO0007000       | ROHL<br>PAD MARECHAL                     | 302424.8  | 51161883.2  | 0.0 | 0.0 | 18006.9<br>124498. | 2960665.6               | 5268.<br>0    | 959666.9             | 261.4          | 46674.5     | 23536.3<br>130991. | 3967006.9    | 55128890.1   | 1480.6         |
| RO0008000       | DUTRA                                    | 346470.6  | 58576238.1  | 0.0 | 0.0 | 6                  | 20857354.3              | 6493.<br>0    | 1104329.6            |                |             | 6                  | 21961683.9   | 80537922.0   | 848.0          |
| RO0009000       | PIC SIDNEY GIRÃO                         | 53694.8   | 8947233.1   | 0.0 | 0.0 | 12787.8            | 2092368.6               |               |                      |                |             |                    | 12787.8      | 2092368.6    | 11039601.7     |
| RO0010000       | PIC GY PARANÁ<br>PIC PAULO ASSIS         | 402320.5  | 61925654.8  | 0.0 | 0.0 | 48308.3            | 7175562.3               | 2440<br>4.5   | 3315038.4            |                |             |                    | 72712.8      | 10490600.7   | 72416255.5     |
| RO0011000       | RIBEIRO                                  | 260198.0  | 38833243.6  | 0.0 | 0.0 | 39504.5            | 5862607.0               | 0.7<br>5458.  | 103.2                |                |             |                    | 39505.2      | 5862710.3    | 44695953.9     |
| RO0012000       | PAD BURAREIRO                            | 210322.1  | 36322984.0  | 0.0 | 0.0 | 78552.3            | 13583182.8              | 7             | 997270.2             | 10.4           | 1693.1      | 84021.4            | 14582146.1   | 50905130.1   |                |
| RO0013000       | PA URUPÁ                                 | 39435.5   | 6501995.3   | 0.0 | 0.0 | 1313.3             | 212539.2                | 189.3         | 30830.1              | 9.0            | 1471.8      | 1511.7             | 244841.1     | 6746836.5    | 490.7          |
| RO0014000       | PA MACHADINHO                            | 116195.4  | 19326077.4  | 0.0 | 0.0 | 96006.5            | 16000189.9              | 537.4         | 95040.9              |                |             |                    | 96543.9      | 16095230.8   | 35421308.2     |
| RO0015000       | PA BOM PRINCÍPIO                         | 67465.6   | 11382682.8  | 0.0 | 0.0 | 14606.6            | 2487676.4               | 157.5         | 27473.3              | 1777.6         | 307553.5    | 16541.7            | 2822703.2    | 14205386.0   | 159.5          |
| RO0016000       | PA CUJUBIM                               | 29614.4   | 4957091.6   | 0.0 | 0.0 | 12342.2            | 2060124.0               |               |                      |                |             |                    | 12342.2      | 2060124.0    | 7017215.6      |
| RO0017000       | PA SÃO FELIPE<br>PA VITÓRIA DA           | 16934.5   | 2837253.3   | 0.0 | 0.0 | 816.0              | 135786.0                |               |                      |                |             |                    | 816.0        | 135786.0     | 2973039.2      |
| RO0018000       | UNIÃO                                    | 18027.4   | 2762032.2   | 0.0 | 0.0 | 3281.7             | 486317.7                |               |                      |                |             |                    | 3281.7       | 486317.7     | 3248349.8      |
| RO0019000       | PA VALE DO JAMARI                        | 31169.8   | 5258479.4   | 0.0 | 0.0 | 19569.2            | 3266169.9               |               |                      |                |             |                    | 19569.2      | 3266169.9    | 8524649.3      |
| RO0020000       | PA DJARU UARU<br>PA RIO PRETO DO         | 22939.3   | 3560294.8   | 0.0 | 0.0 | 4323.0             | 474582.4                | 1374.<br>1    | 128429.4             |                |             |                    | 5697.1       | 603011.8     | 4163306.6      |
| RO0021000       | CANDEIAS                                 | 20683.2   | 3469886.5   | 0.0 | 0.0 | 13050.5            | 2204252.7               |               |                      |                |             |                    | 13050.5      | 2204252.7    | 5674139.2      |
| RO0022000       | PA ZEFERINO                              | 7232.2    | 1147024.4   | 0.0 | 0.0 | 321.6              | 52176.2                 |               |                      |                |             |                    | 321.6        | 52176.2      | 1199200.6      |
| RO0023000       | PA PYRINEOS<br>PA TANCREDO               | 4342.7    | 726760.3    | 0.0 | 0.0 | 188.3              | 31089.0                 |               |                      |                |             |                    | 188.3        | 31089.0      | 757849.3       |
| RO0024000       | NEVES                                    | 28284.0   | 4699979.9   | 0.0 | 0.0 | 375.0              | 61854.8                 |               |                      |                |             |                    | 375.0        | 61854.8      | 4761834.6      |
| RO0025000       | PA ITAPIREMA                             | 5892.7    | 989073.9    | 0.0 | 0.0 | 146.8              | 24636.4                 |               |                      |                |             |                    | 146.8        | 24636.4      | 1013710.3      |
| RO0026000       | PA JATUARANA                             | 31940.8   | 5266211.1   | 0.0 | 0.0 | 9214.2             | 1505342.2               |               |                      |                |             |                    | 9214.2       | 1505342.2    | 6771553.3      |

|           |                                |         |           |     |     |         |           |            |          |      |         |           |           |           |
|-----------|--------------------------------|---------|-----------|-----|-----|---------|-----------|------------|----------|------|---------|-----------|-----------|-----------|
| RO0027000 | PA MARCOS FREIRE<br>PA VERDE   | 7474.5  | 1217417.5 | 0.0 | 0.0 | 322.7   | 51890.0   | 2853.<br>9 | 450468.1 |      | 3176.6  | 502358.1  | 1719775.6 |           |
| RO0028000 | PA VERDE<br>SERINGAL           | 8210.0  | 1233876.5 | 0.0 | 0.0 | 3006.4  | 442310.1  | 3170.<br>6 | 417750.0 |      | 6177.0  | 860060.1  | 2093936.6 |           |
| RO0029000 | PA BURITI                      | 23372.4 | 3875716.8 | 0.0 | 0.0 | 2224.4  | 366291.9  |            |          |      | 2224.4  | 366291.9  | 4242008.7 |           |
| RO0030000 | PA TARUMÃ<br>PA NOVA           | 2939.8  | 485928.6  | 0.0 | 0.0 | 189.7   | 30936.6   |            |          |      | 189.7   | 30936.6   | 516865.2  | 47.6      |
| RO0031000 | CONQUISTA<br>PA RIBEIRÃO       | 16362.0 | 2388382.9 | 0.0 | 0.0 | 3453.6  | 444389.1  | 1054.<br>2 | 108149.1 |      | 4507.8  | 552538.3  | 2940921.2 |           |
| RO0032000 | PA RIBEIRÃO<br>GRANDE          | 5732.5  | 902057.5  | 0.0 | 0.0 | 929.7   | 150110.0  | 751.5      | 117557.6 |      | 1681.1  | 267667.6  | 1169725.1 |           |
| RO0033000 | PA CACHOEIRA                   | 8319.8  | 1423042.5 | 0.0 | 0.0 | 782.2   | 133725.5  |            |          |      | 782.2   | 133725.5  | 1556768.0 |           |
| RO0034000 | PA EMBURANA                    | 2290.6  | 382690.4  | 0.0 | 0.0 | 293.3   | 48216.3   | 281.7      | 46372.3  |      | 575.0   | 94588.6   | 477279.0  |           |
| RO0035000 | PA VÁRZEA ALEGRE               | 6838.4  | 1034724.9 | 0.0 | 0.0 | 1035.1  | 157532.1  |            |          |      | 1035.1  | 157532.1  | 1192257.0 |           |
| RO0036000 | PA NOVA FLORESTA               | 1798.6  | 325065.5  | 0.0 | 0.0 | 2448.3  | 441978.2  | 169.3      | 31560.7  |      | 2617.6  | 473539.0  | 798604.5  |           |
| RO0037000 | PA COLINA VERDE                | 24076.8 | 4333008.5 | 0.0 | 0.0 | 2980.2  | 541898.7  | 1046.<br>5 | 192707.2 | 12.6 | 2341.9  | 4039.3    | 736947.8  | 5069956.3 |
| RO0038000 | PA MASSANGANA                  | 18630.6 | 3345833.3 | 0.0 | 0.0 | 6670.2  | 1201303.7 | 5048.<br>8 | 909392.9 |      | 11719.0 | 2110696.6 | 5456529.8 |           |
| RO0042000 | PA ADRIANA                     | 1748.1  | 263353.3  | 0.0 | 0.0 | 189.5   | 28548.3   |            |          |      | 189.5   | 28548.3   | 291901.5  |           |
| RO0043000 | PA RIO ALTO                    | 35655.7 | 6118784.4 | 0.0 | 0.0 | 8092.1  | 1379829.3 | 10.8       | 1942.2   |      | 8102.9  | 1381771.5 | 7500555.9 |           |
| RO0044000 | PA PIRAJUI                     | 88.4    | 13592.3   | 0.0 | 0.0 | 23.9    | 3739.6    | 1379.<br>5 | 216438.1 |      | 1403.4  | 220177.7  | 233770.0  |           |
| RO0045000 | PA CANAÃ                       | 2511.0  | 421238.2  | 0.0 | 0.0 | 549.3   | 91521.7   |            |          |      | 549.3   | 91521.7   | 512759.9  | 11.2      |
| RO0046000 | PA ELI MOREIRA                 | 2511.5  | 383497.0  | 0.0 | 0.0 | 41.3    | 6293.7    |            |          |      | 41.3    | 6293.7    | 389790.7  |           |
| RO0047000 | PA CUJUBIM II                  | 1852.1  | 321660.2  | 0.0 | 0.0 | 960.3   | 168353.9  |            |          |      | 960.3   | 168353.9  | 490014.2  |           |
| RO0048000 | PA SÃO FRANCISCO<br>PA AMÉRICO | 3433.2  | 565825.8  | 0.0 | 0.0 | 4437.7  | 730066.9  |            |          |      | 4437.7  | 730066.9  | 1295892.7 |           |
| RO0049000 | VENTURA<br>PA SANTA            | 2417.2  | 398589.9  | 0.0 | 0.0 | 412.0   | 67851.3   |            |          |      | 412.0   | 67851.3   | 466441.3  | 4.2       |
| RO0050000 | CÁTARINA                       | 2355.8  | 386157.6  | 0.0 | 0.0 | 132.6   | 21608.4   |            |          |      | 132.6   | 21608.4   | 407766.0  |           |
| RO0051000 | PA RIO BRANCO                  | 4345.4  | 708194.3  | 0.0 | 0.0 | 382.3   | 62308.9   |            |          |      | 382.3   | 62308.9   | 770503.2  |           |
| RO0052000 | PA SANTA CRUZ                  | 34105.6 | 5893624.3 | 0.0 | 0.0 | 20548.4 | 3609053.5 | 522.2      | 92579.7  |      | 21070.6 | 3701633.2 | 9595257.6 |           |
| RO0053000 | PA SANTA MARIA                 | 6718.2  | 1129261.6 | 0.0 | 0.0 | 3957.0  | 675591.2  |            |          |      | 3957.0  | 675591.2  | 1804852.8 |           |
| RO0054000 | PA TABAJARA                    | 10178.2 | 1708923.6 | 0.0 | 0.0 | 3856.2  | 646847.3  |            |          |      | 3856.2  | 646847.3  | 2355770.9 |           |
| RO0055000 | PA PEDRA REDONDA               | 9447.8  | 1545551.1 | 0.0 | 0.0 | 2771.0  | 455640.0  |            |          |      | 2771.0  | 455640.0  | 2001191.0 | 1.1       |
| RO0056000 | PA GUARAJUS                    | 3523.7  | 525180.7  | 0.0 | 0.0 | 666.4   | 94759.6   |            |          |      | 666.4   | 94759.6   | 619940.3  |           |
| RO0057000 | PA UNIÃO                       | 18935.2 | 3129691.7 | 0.0 | 0.0 | 7229.0  | 1180800.4 |            |          |      | 7229.0  | 1180800.4 | 4310492.1 |           |

|           |                                     |         |           |     |     |         |           |       |          |      |         |           |            |          |
|-----------|-------------------------------------|---------|-----------|-----|-----|---------|-----------|-------|----------|------|---------|-----------|------------|----------|
| RO0058000 | PA LAJES                            | 38867.7 | 6541987.8 | 0.0 | 0.0 | 23590.4 | 4012800.9 | 2.2   | 352.2    |      | 23592.6 | 4013153.1 | 10555140.9 |          |
| RO0059000 | PA LAGOA NOVA                       | 2647.3  | 436013.0  | 0.0 | 0.0 | 121.0   | 19756.0   |       |          |      | 121.0   | 19756.0   | 455769.0   |          |
| RO0061000 | PA PALMARES<br>PA SANTA<br>CATARINA | 8212.8  | 1354051.3 | 0.0 | 0.0 | 1349.6  | 220774.1  | 187.1 | 30498.7  |      | 1536.7  | 251272.8  | 1605324.2  |          |
| RO0062000 | EXPANSÃO I                          | 672.6   | 110132.4  | 0.0 | 0.0 | 27.6    | 4490.4    |       |          |      | 27.6    | 4490.4    | 114622.8   |          |
| RO0063000 | PA SANTA MARIA II                   | 19341.7 | 3355349.3 | 0.0 | 0.0 | 18856.2 | 3272668.6 |       |          |      | 18856.2 | 3272668.6 | 6628017.9  | 73.2     |
| RO0064000 | PA ZUMBI                            | 1803.6  | 315131.3  | 0.0 | 0.0 | 170.3   | 30724.0   |       |          |      | 170.3   | 30724.0   | 345855.4   |          |
| RO0065000 | PA CHICO MENDES                     | 1553.5  | 253534.5  | 0.0 | 0.0 | 229.1   | 37360.0   | 342.7 | 55853.3  |      | 571.8   | 93213.3   | 346747.8   | 43.1     |
| RO0066000 | PA PRIMAVERA<br>PA MARGARIDA        | 5574.3  | 909614.9  | 0.0 | 0.0 | 454.5   | 74231.2   |       |          |      | 454.5   | 74231.2   | 983846.0   |          |
| RO0067000 | ALVES                               | 7393.6  | 1218888.1 | 0.0 | 0.0 | 4292.2  | 699992.0  | 213.7 | 35318.0  |      | 4505.9  | 735310.0  | 1954198.1  |          |
| RO0068000 | PA CHICO MENDES II                  | 1441.3  | 236074.8  | 0.0 | 0.0 | 209.4   | 34145.0   | 330.7 | 53982.4  |      | 540.1   | 88127.4   | 324202.2   | 14.6     |
| RO0069000 | PA 14 DE AGOSTO<br>PA MARIA JOSÉ    | 453.8   | 74828.9   | 0.0 | 0.0 | 24.3    | 4067.3    |       |          | 14.2 | 2387.2  | 38.6      | 6454.5     | 81283.4  |
| RO0070000 | RIQUE                               | 3293.6  | 555091.0  | 0.0 | 0.0 | 216.7   | 36835.0   |       |          | 5.6  | 918.8   | 222.4     | 37753.8    | 592844.8 |
| RO0071000 | PA PROZOLINA                        | 1346.3  | 249659.9  | 0.0 | 0.0 | 33.6    | 6200.0    |       |          |      | 33.6    | 6200.0    | 255860.0   |          |
| RO0072000 | PA MENEZES FILHO<br>PA MANOEL SOUZA | 26149.6 | 4453667.9 | 0.0 | 0.0 | 6478.3  | 1112364.7 | 101.2 | 18887.2  |      | 6579.5  | 1131251.9 | 5584919.8  |          |
| RO0073000 | CARDOSO<br>PA OZIEL DOS             | 797.7   | 129884.6  | 0.0 | 0.0 | 196.0   | 31962.4   |       |          |      | 196.0   | 31962.4   | 161847.0   |          |
| RO0074000 | CARAJAS                             | 1023.5  | 166417.7  | 0.0 | 0.0 | 766.8   | 124964.6  |       |          |      | 766.8   | 124964.6  | 291382.3   | 3.2      |
| RO0075000 | PA PALMA ARRUDA                     | 14450.1 | 2382018.6 | 0.0 | 0.0 | 6031.6  | 998034.8  |       |          |      | 6031.6  | 998034.8  | 3380053.5  | 34.7     |
| RO0076000 | PA JOSÉ CARLOS                      | 1188.6  | 193716.2  | 0.0 | 0.0 | 409.2   | 66687.6   |       |          |      | 409.2   | 66687.6   | 260403.8   |          |
| RO0077000 | PA CONCEIÇÃO                        | 6170.0  | 1076601.7 | 0.0 | 0.0 | 489.1   | 85402.5   |       |          |      | 489.1   | 85402.5   | 1162004.2  |          |
| RO0078000 | PA RENASCER<br>PA AGOSTINHO         | 7426.4  | 1308654.8 | 0.0 | 0.0 | 7998.7  | 1409097.9 |       |          |      | 7998.7  | 1409097.9 | 2717752.7  |          |
| RO0079000 | BECKER<br>PA CHICO MENDES           | 8967.1  | 1554135.3 | 0.0 | 0.0 | 4555.2  | 794379.0  |       |          |      | 4555.2  | 794379.0  | 2348514.4  |          |
| RO0080000 | III<br>PA PEDRA DO                  | 2476.5  | 398300.2  | 0.0 | 0.0 | 230.4   | 37529.9   | 273.0 | 44485.8  |      | 503.3   | 82015.7   | 480315.9   |          |
| RO0081000 | ABISMO                              | 10705.8 | 1760651.7 | 0.0 | 0.0 | 1904.4  | 311821.4  |       |          |      | 1904.4  | 311821.4  | 2072473.1  |          |
| RO0082000 | PA LAGOA AZUL                       | 6956.4  | 1139941.2 | 0.0 | 0.0 | 1370.8  | 224410.5  |       |          |      | 1370.8  | 224410.5  | 1364351.6  |          |
| RO0083000 | PA CEARA                            | 3059.2  | 463023.5  | 0.0 | 0.0 | 388.3   | 59250.8   | 663.3 | 100560.4 |      | 1051.7  | 159811.2  | 622834.7   |          |
| RO0086000 | PA SÃO DOMINGOS                     | 15006.5 | 2448122.1 | 0.0 | 0.0 | 4005.7  | 652866.0  |       |          |      | 4005.7  | 652866.0  | 3100988.1  |          |
| RO0087000 | PA SÃO PEDRO                        | 7918.4  | 1297577.2 | 0.0 | 0.0 | 1147.4  | 187166.0  |       |          |      | 1147.4  | 187166.0  | 1484743.2  |          |

|           |                         |         |           |     |     |         |           |        |          |         |           |           |          |           |
|-----------|-------------------------|---------|-----------|-----|-----|---------|-----------|--------|----------|---------|-----------|-----------|----------|-----------|
| RO0088000 | PA REVIVER              | 12670.9 | 2109157.9 | 0.0 | 0.0 | 1801.8  | 298596.4  |        |          | 1801.8  | 298596.4  | 2407754.3 |          |           |
| RO0094000 | PA JOSÉODON             | 6710.7  | 1120148.6 | 0.0 | 0.0 | 2216.2  | 366163.3  | 1101.3 | 191941.2 | 3317.5  | 558104.5  | 1678253.1 |          |           |
| RO0095000 | PA ZENON                | 7895.9  | 1458974.6 | 0.0 | 0.0 | 3863.0  | 720556.7  |        |          | 3863.0  | 720556.7  | 2179531.3 |          |           |
| RO0096000 | PA FILADELFIA           | 1247.1  | 209894.7  | 0.0 | 0.0 | 752.1   | 126686.6  | 604.7  | 63526.1  | 1356.8  | 190212.7  | 400107.3  |          |           |
| RO0097000 | PA SANTA VITORIA        | 428.4   | 68665.9   | 0.0 | 0.0 | 58.1    | 9213.3    |        |          | 58.1    | 9213.3    | 77879.2   |          |           |
| RO0098000 | PA AGUINEL DIVINO       | 4805.3  | 819102.7  | 0.0 | 0.0 | 1439.0  | 251823.7  |        |          | 1439.0  | 251823.7  | 1070926.4 |          |           |
| RO0099000 | PA RIO MADEIRA          | 2196.6  | 379540.5  | 0.0 | 0.0 | 5569.5  | 974724.0  | 296.4  | 15202.6  | 5865.9  | 989926.6  | 1369467.1 | 81.3     |           |
| RO0100000 | PA ALIANÇA              | 14555.5 | 2345055.5 | 0.0 | 0.0 | 8370.5  | 1435042.1 | 110.2  | 18827.7  | 8480.7  | 1453869.7 | 3798925.3 | 2.0      |           |
| RO0101000 | PA CACHOEIRA DE SAMUEL  | 1169.3  | 193698.5  | 0.0 | 0.0 | 497.8   | 81911.6   |        |          | 497.8   | 81911.6   | 275610.1  |          |           |
| RO0102000 | PA CEDRO JEQUITIBÁ      | 4990.0  | 824655.2  | 0.0 | 0.0 | 1231.4  | 201792.8  |        |          | 1231.4  | 201792.8  | 1026448.0 |          |           |
| RO0103000 | PA ANTONIO PEREIRA NERI | 1739.4  | 284019.2  | 0.0 | 0.0 | 323.4   | 52740.0   |        |          | 323.4   | 52740.0   | 336759.2  | 165.4    |           |
| RO0104000 | PA AMIGOS DO CAMPO      | 5357.0  | 879687.8  | 0.0 | 0.0 | 2160.7  | 352837.4  |        |          | 2160.7  | 352837.4  | 1232525.2 |          |           |
| RO0106000 | PA RONCAUTO             | 1272.3  | 215562.0  | 0.0 | 0.0 | 210.5   | 36324.9   |        |          | 210.5   | 36324.9   | 251886.9  |          |           |
| RO0107000 | PA ASA DO AVIÃO         | 2334.0  | 388798.0  | 0.0 | 0.0 | 194.6   | 31826.3   |        |          | 194.6   | 31826.3   | 420624.2  |          |           |
| RO0108000 | PA RIO CONSUELO         | 2605.4  | 449240.7  | 0.0 | 0.0 | 938.6   | 165073.4  |        |          | 938.6   | 165073.4  | 614314.1  |          |           |
| RO0109000 | PA SANTA HELENA         | 11025.5 | 1826195.0 | 0.0 | 0.0 | 1022.2  | 167431.3  |        |          | 1022.2  | 167431.3  | 1993626.3 |          |           |
| RO0110000 | PA MARIA MENDES         | 1350.5  | 220681.6  | 0.0 | 0.0 | 365.5   | 59591.4   |        |          | 365.5   | 59591.4   | 280273.0  |          |           |
| RO0111000 | PA NELSON ALVES         | 827.6   | 137097.1  | 0.0 | 0.0 | 110.0   | 18013.1   |        |          | 110.0   | 18013.1   | 155110.2  |          |           |
| RO0112000 | PA JANDAIRA             | 766.5   | 126314.2  | 0.0 | 0.0 | 251.2   | 41026.7   |        |          | 251.2   | 41026.7   | 167340.9  |          |           |
| RO0113000 | PA JOANA D ARC I        | 8809.7  | 1498985.6 | 0.0 | 0.0 | 13157.1 | 2233168.7 | 7.2    | 580.4    | 13164.3 | 2233749.1 | 3732734.7 | 0.0      |           |
| RO0114000 | PA JOANA D ARC II       | 3587.1  | 619985.3  | 0.0 | 0.0 | 11128.2 | 1911855.7 | 20.9   | 1613.0   | 11149.1 | 1913468.7 | 2533454.0 | 0.0      |           |
| RO0115000 | PA JOANA D ARC III      | 5001.3  | 835307.9  | 0.0 | 0.0 | 19156.2 | 3235383.6 | 11.2   | 1967.3   | 19167.4 | 3237350.9 | 4072658.9 | 1.4      |           |
| RO0116000 | PA FRANCISCO JOAO       | 9605.0  | 1579787.9 | 0.0 | 0.0 | 3930.3  | 640967.5  |        |          | 3930.3  | 640967.5  | 2220755.4 |          |           |
| RO0117000 | PA FLORIANO MAGNO       | 11311.7 | 1861020.2 | 0.0 | 0.0 | 4941.8  | 806092.6  |        |          | 174.3   | 28407.3   | 5116.1    | 834500.0 | 2695520.2 |
| RO0118000 | PA ESMOSINA PINHO       | 8586.7  | 1432535.0 | 0.0 | 0.0 | 2883.8  | 479608.8  |        |          | 48.9    | 7973.6    | 2932.8    | 487582.4 | 1920117.4 |
| RO0119000 | PA IVO INACIO           | 7381.1  | 1212076.1 | 0.0 | 0.0 | 5263.1  | 859054.3  |        |          | 5263.1  | 859054.3  | 2071130.5 |          |           |
| RO0120000 | PA NOVA VIDA            | 7109.7  | 1167130.5 | 0.0 | 0.0 | 1474.6  | 240388.9  |        |          | 1474.6  | 240388.9  | 1407519.5 |          |           |
| RO0121000 | PA SÃO JOSÉ DO BURITIS  | 8212.1  | 1356040.5 | 0.0 | 0.0 | 916.6   | 150006.4  |        |          | 916.6   | 150006.4  | 1506046.8 |          |           |

|           |                                     |         |           |     |     |        |           |            |          |        |           |           |           |      |
|-----------|-------------------------------------|---------|-----------|-----|-----|--------|-----------|------------|----------|--------|-----------|-----------|-----------|------|
| RO0122000 | PA SÃO PAULO                        | 4025.0  | 657582.5  | 0.0 | 0.0 | 778.3  | 126846.9  |            |          | 778.3  | 126846.9  | 784429.5  |           |      |
| RO0123000 | PA NILSON CAMPOS                    | 6930.7  | 1138123.6 | 0.0 | 0.0 | 5588.3 | 912573.2  |            |          | 5588.3 | 912573.2  | 2050696.8 |           |      |
| RO0125000 | PA ORIENTE<br>PA EDMILSON           | 7548.7  | 1281262.5 | 0.0 | 0.0 | 2114.1 | 366716.1  |            |          | 2114.1 | 366716.1  | 1647978.5 |           |      |
| RO0126000 | PASTOR                              | 86.8    | 16123.6   | 0.0 | 0.0 | 329.1  | 61428.3   |            |          | 329.1  | 61428.3   | 77551.9   |           |      |
| RO0127000 | PA PADRE EZEQUIEL<br>PA PARAISO DAS | 3406.8  | 567757.1  | 0.0 | 0.0 | 2566.6 | 418505.0  | 62.7       | 8731.5   | 2629.3 | 427236.5  | 994993.6  |           |      |
| RO0129000 | ACÁCIAS                             | 505.7   | 88985.5   | 0.0 | 0.0 | 77.2   | 13607.3   |            |          | 77.2   | 13607.3   | 102592.8  |           |      |
| RO0130000 | PDS CERNAMBI                        | 7343.9  | 1199024.4 | 0.0 | 0.0 | 7477.1 | 1218949.7 |            |          | 7477.1 | 1218949.7 | 2417974.2 | 16.2      |      |
| RO0131000 | PA JATOBÁ<br>PCA NOVO               | 4872.0  | 795141.0  | 0.0 | 0.0 | 1881.0 | 306601.4  |            |          | 1881.0 | 306601.4  | 1101742.4 |           |      |
| RO0132000 | ALVORECER                           | 695.6   | 116186.3  | 0.0 | 0.0 | 29.4   | 4797.6    |            |          | 29.4   | 4797.6    | 120983.9  |           |      |
| RO0133000 | PA BOM PRINCÍPIO II                 | 2365.1  | 395448.0  | 0.0 | 0.0 | 51.0   | 8419.6    |            |          | 51.0   | 8419.6    | 403867.6  |           |      |
| RO0134000 | PA BELA VISTA                       | 1191.4  | 191560.4  | 0.0 | 0.0 | 556.4  | 90468.5   |            |          | 556.4  | 90468.5   | 282028.9  | 0.8       |      |
| RO0135000 | PA SERRA GRANDE<br>PA SÃO FRANCISCO | 5304.9  | 923425.2  | 0.0 | 0.0 | 2116.7 | 371051.6  | 67.2       | 11757.7  | 2183.8 | 382809.3  | 1306234.5 |           |      |
| RO0136000 | DO GUAPORÉ<br>PA MARTIM             | 4193.3  | 685195.1  | 0.0 | 0.0 | 125.4  | 22046.5   |            |          | 125.4  | 22046.5   | 707241.6  |           |      |
| RO0139000 | PESCADOR                            | 14177.9 | 2106373.0 | 0.0 | 0.0 | 1266.1 | 161781.7  | 2753.<br>1 | 420530.0 | 0.1    | 8.9       | 4019.2    | 2688693.6 | 25.8 |
| RO0140000 | PA GOGÓ DA ONÇA                     | 19459.6 | 3265606.2 | 0.0 | 0.0 | 4516.5 | 757103.3  |            |          | 4516.5 | 757103.3  | 4022709.5 |           |      |
| RO0141000 | PA CAUTARINHO<br>PA SAGRADA         | 12397.4 | 2087488.6 | 0.0 | 0.0 | 3960.5 | 672955.1  |            |          | 3960.5 | 672955.1  | 2760443.6 |           |      |
| RO0142000 | FAMÍLIA<br>PDS NAZARÉ E BOA         | 4079.2  | 708510.5  | 0.0 | 0.0 | 988.1  | 173984.9  |            |          | 988.1  | 173984.9  | 882495.3  |           |      |
| RO0143000 | VITÓRIA<br>PA IGARAPÉ DAS           | 789.2   | 137012.5  | 0.0 | 0.0 | 2725.1 | 477012.7  |            |          | 2725.1 | 477012.7  | 614025.3  | 158.1     |      |
| RO0146000 | ARARAS<br>PA MARECHAL               | 7456.4  | 1215928.1 | 0.0 | 0.0 | 7987.8 | 1302050.9 |            |          | 7987.8 | 1302050.9 | 2517978.9 |           |      |
| RO0147000 | RONDON                              | 5801.2  | 946641.3  | 0.0 | 0.0 | 5669.2 | 923967.1  |            |          | 5669.2 | 923967.1  | 1870608.4 |           |      |
| RO0148000 | PA IGARAPÉ AZUL                     | 5864.6  | 955758.1  | 0.0 | 0.0 | 4747.3 | 773667.0  |            |          | 4747.3 | 773667.0  | 1729425.1 |           |      |
| RO0149000 | PA ROSANA LECY                      | 1379.5  | 224824.2  | 0.0 | 0.0 | 1624.5 | 264737.2  |            |          | 1624.5 | 264737.2  | 489561.4  |           |      |
| RO0150000 | PA PAU BRASIL<br>PA IGARAPE         | 8673.3  | 1419466.7 | 0.0 | 0.0 | 6208.7 | 1011967.4 |            |          | 6208.7 | 1011967.4 | 2431434.2 |           |      |
| RO0151000 | TAQUARA                             | 10858.6 | 1775697.2 | 0.0 | 0.0 | 8716.0 | 1420962.6 |            |          |        |           | 3204169.9 |           |      |
| RO0152000 | PA PAU DARCO                        | 9771.5  | 1594766.3 | 0.0 | 0.0 | 7968.6 | 1299074.3 |            |          | 7968.6 | 1299074.3 | 2893840.6 |           |      |
| RO0153000 | PA RIBEIRÃO                         | 6591.1  | 1075552.3 | 0.0 | 0.0 | 6309.4 | 1028318.8 |            |          | 6309.4 | 1028318.8 | 2103871.1 |           |      |
| RO0156000 | PDS PORTO SEGURO                    | 482.5   | 78967.0   | 0.0 | 0.0 | 981.2  | 160375.1  |            |          | 981.2  | 160375.1  | 239342.1  | 27.7      |      |
| RO0157000 | PA MIGRANTES                        | 1648.7  | 272830.0  | 0.0 | 0.0 | 368.7  | 60721.4   |            |          | 6.3    | 1027.1    | 334578.5  |           |      |

|           |                                                      |         |           |     |     |              |            |             |           |              |            |            |        |
|-----------|------------------------------------------------------|---------|-----------|-----|-----|--------------|------------|-------------|-----------|--------------|------------|------------|--------|
| RO0158000 | PA ALTAMIRA                                          | 7389.6  | 1219693.1 | 0.0 | 0.0 | 2542.2       | 416156.8   |             |           | 2542.2       | 416156.8   | 1635849.9  |        |
| RO0159000 | PA SANTA ELISA                                       | 5992.9  | 1019151.6 | 0.0 | 0.0 | 846.8        | 141782.7   | 241.1       | 43293.5   | 1087.8       | 185076.1   | 1204227.7  |        |
| RO0161000 | PA PAULO FREIRE                                      | 1288.1  | 206217.3  | 0.0 | 0.0 | 577.3        | 93851.9    |             |           | 577.3        | 93851.9    | 300069.2   |        |
| RO0162000 | PA ANTONIO<br>CONSELHEIRO                            | 511.9   | 83426.4   | 0.0 | 0.0 | 445.6        | 72613.0    |             |           | 445.6        | 72613.0    | 156039.4   |        |
| RO0163000 | PAF JEQUITIBÁ<br>PDS ROLIM DE<br>MOURA DO<br>GUAPORÉ | 18871.6 | 3203063.7 | 0.0 | 0.0 | 118313.<br>9 | 20095972.4 |             |           | 118313.<br>9 | 20095972.4 | 23299036.1 | 0.0    |
| RO0164000 |                                                      | 825.9   | 127112.0  | 0.0 | 0.0 | 1003.7       | 169120.1   | 699.5       | 53677.1   | 1703.3       | 222797.2   | 349909.2   | 31.3   |
| RO0165000 | PA BOA ESPERANÇA                                     | 283.8   | 23881.7   | 0.0 | 0.0 | 32.8         | 1631.6     | 174.6       | 5963.5    | 207.4        | 7595.1     | 31476.8    |        |
| RO0166000 | PA RIO SÃO PEDRO                                     | 1261.0  | 188569.4  | 0.0 | 0.0 | 646.8        | 92281.8    | 83.5        | 2136.6    | 730.3        | 94418.4    | 282987.8   |        |
| RO0167000 | PA LAMARQUINHA<br>PDS DOM XAVIER                     | 405.4   | 66205.9   | 0.0 | 0.0 | 86.2         | 14059.8    |             |           | 86.2         | 14059.8    | 80265.7    |        |
| RO0168000 | REY<br>PA NOVO                                       | 213.4   | 37085.6   | 0.0 | 0.0 | 3300.0       | 572437.5   | 2302<br>5.8 | 3975318.8 | 26325.8      | 4547756.3  | 4584841.9  | 3663.9 |
| RO0170000 | PROGRESSO                                            | 404.0   | 66626.9   | 0.0 | 0.0 | 50.2         | 8183.3     |             |           | 50.2         | 8183.3     | 74810.2    |        |
| RO0171000 | PA LAMARCA                                           | 798.9   | 130204.8  | 0.0 | 0.0 | 218.3        | 35582.1    |             |           | 218.3        | 35582.1    | 165786.9   |        |
| RO0172000 | PA FLOR DO<br>AMAZONAS 1                             | 4023.1  | 708805.8  | 0.0 | 0.0 | 6770.9       | 1193326.0  |             |           | 6770.9       | 1193326.0  | 1902131.8  |        |
| RO0173000 | PA FLOR DO<br>AMAZONAS 2                             | 1628.6  | 286910.1  | 0.0 | 0.0 | 3535.8       | 623190.9   |             |           | 3535.8       | 623190.9   | 910101.0   |        |
| RO0174000 | PA FLOR DO<br>AMAZONAS 3                             | 2682.3  | 472681.9  | 0.0 | 0.0 | 4418.1       | 778739.2   |             |           | 4418.1       | 778739.2   | 1251421.2  |        |
| RO0175000 | PA NORTE SUL                                         | 3674.1  | 601546.6  | 0.0 | 0.0 | 1391.4       | 227110.5   |             |           | 1391.4       | 227110.5   | 828657.2   |        |
| RO0176000 | PA NORTE SUL I                                       | 833.5   | 135919.3  | 0.0 | 0.0 | 495.4        | 80734.0    |             |           | 495.4        | 80734.0    | 216653.3   |        |
| RO0177000 | PA PORTO<br>MURTINHO                                 | 1360.4  | 235674.4  | 0.0 | 0.0 | 353.6        | 62144.7    |             |           | 353.6        | 62144.7    | 297819.1   |        |
| RO0178000 | PA FLOR DO<br>AMAZONAS 4                             | 2245.9  | 394775.8  | 0.0 | 0.0 | 3573.9       | 629791.5   |             |           | 3573.9       | 629791.5   | 1024567.4  |        |
| RO0179000 | PA CAMPO NOVO<br>PA RABO DO                          | 526.7   | 86629.3   | 0.0 | 0.0 | 116.1        | 19030.5    |             |           | 116.1        | 19030.5    | 105659.8   |        |
| RO0180000 | TAMANDUÁ                                             | 3180.7  | 525155.0  | 0.0 | 0.0 | 803.7        | 131592.8   |             |           | 803.7        | 131592.8   | 656747.8   |        |
| RO0181000 | PA 13 DE OUTUBRO                                     | 446.1   | 73090.7   | 0.0 | 0.0 | 70.7         | 11536.6    |             |           | 70.7         | 11536.6    | 84627.2    |        |
| RO0182000 | PA UNIÃO I                                           | 1713.9  | 262081.3  | 0.0 | 0.0 | 249.9        | 38238.1    |             |           | 249.9        | 38238.1    | 300319.4   |        |
| RO0183000 | PA CALADINHO                                         | 585.9   | 86915.9   | 0.0 | 0.0 | 222.1        | 30603.5    |             |           | 222.1        | 30603.5    | 117519.5   | 53.0   |
| RO0188000 | PA SANTA BÁRBARA<br>PA VALE                          | 279.3   | 46000.8   | 0.0 | 0.0 | 0.9          | 143.4      |             |           | 0.9          | 143.4      | 46144.2    |        |
| RO0195000 | ENCANTADO                                            | 1474.6  | 246807.1  | 0.0 | 0.0 | 1513.4       | 246685.0   |             |           | 1513.4       | 246685.0   | 493492.2   |        |
| RO0216000 | PA MARANATA                                          | 3805.7  | 574336.1  | 0.0 | 0.0 | 1774.3       | 271623.4   |             |           | 1774.3       | 271623.4   | 845959.5   |        |



|                   |                            |           |             |     |     |           |             |        |            |         |           |           |             |             |         |
|-------------------|----------------------------|-----------|-------------|-----|-----|-----------|-------------|--------|------------|---------|-----------|-----------|-------------|-------------|---------|
| RO0217000         | PA ZÉ BENTÃO               | 3393.4    | 511331.5    | 0.0 | 0.0 | 2250.7    | 344513.6    |        |            |         | 2250.7    | 344513.6  | 855845.1    |             |         |
| RO0219000         | PA SANTA IZABEL            | 175.2     | 30879.8     | 0.0 | 0.0 | 75.7      | 13341.2     |        |            |         | 75.7      | 13341.2   | 44221.0     |             |         |
| RO0221000         | PA RIO AZUL                | 2000.3    | 350988.4    | 0.0 | 0.0 | 498.8     | 87839.9     |        |            |         | 498.8     | 87839.9   | 438828.3    |             |         |
| RO0222000         | PA RIO AZUL II             | 1852.9    | 326588.2    | 0.0 | 0.0 | 523.7     | 92315.2     |        |            |         | 523.7     | 92315.2   | 418903.4    |             |         |
| RO0227000         | PA BELO HORIZONTE          | 4814.9    | 796749.1    | 0.0 | 0.0 | 13259.3   | 2207161.8   |        |            |         | 13259.3   | 2207161.8 | 3003910.9   |             |         |
| RO0228000         | PA MACACO PRETO            | 877.8     | 152193.4    | 0.0 | 0.0 | 661.1     | 115623.3    | 60.4   | 10144.0    |         | 721.5     | 125767.2  | 277960.6    |             |         |
| RO0231000         | PA DOIS DE JULHO           | 1551.0    | 254317.0    | 0.0 | 0.0 | 2002.6    | 326561.7    |        |            |         | 2002.6    | 326561.7  | 580878.7    |             |         |
| RO0232000         | PA ALBERICO CARVALHO       | 1159.2    | 174630.8    | 0.0 | 0.0 |           |             |        |            |         | 0.0       | 0.0       | 174630.8    |             |         |
| RO0233000         | PA MARANATA II             | 860.8     | 129905.1    | 0.0 | 0.0 | 1.0       | 150.4       |        |            |         | 1.0       | 150.4     | 130055.5    |             |         |
| RO0234000         | PA ALZIRA AUGUSTO MONTEIRO | 1425.8    | 214790.3    | 0.0 | 0.0 |           |             |        |            |         | 0.0       | 0.0       | 214790.3    |             |         |
| Total in Rondônia |                            | 3280973.5 | 539907815.5 | 0.0 | 0.0 | 1054360.8 | 175314649.3 | 9315.8 | 14687413.2 | 2376.6  | 409613.5  | 1149896.1 | 190411676.0 | 730319491.5 | 11069.5 |
| <b>RORAIMA</b>    |                            |           | 0.0         | 0.0 | 0.0 |           |             |        |            |         |           | 0.0       | 0.0         | 0.0         |         |
| RR0003000         | PAD ANAUÁ                  | 86711.2   | 16107010.1  | 0.0 | 0.0 | 112108.8  | 20931216.9  | 438.0  | 81854.4    | 20623.9 | 3828552.7 | 7         | 24841624.1  | 40948634.2  |         |
| RR0006000         | PA JATAPU                  | 71766.0   | 13355431.7  | 0.0 | 0.0 | 65524.9   | 12242184.8  |        |            | 17336.5 | 3239295.9 | 82861.4   | 15481480.8  | 28836912.4  |         |
| RR0007000         | PA PAREDÃO                 | 14521.0   | 2215238.2   | 0.0 | 0.0 | 58242.4   | 9019979.3   | 186.5  | 28555.6    | 3683.1  | 588775.1  | 62111.9   | 9637309.9   | 11852548.2  |         |
| RR0008000         | PA EQUADOR                 | 1122.1    | 209599.6    | 0.0 | 0.0 | 9469.7    | 1769781.4   |        |            |         |           | 9469.7    | 1769781.4   | 1979380.9   |         |
| RR0009000         | PA TEPEQUÉM                | 4227.9    | 704470.2    | 0.0 | 0.0 | 25074.8   | 4340464.0   | 1898.2 | 348080.1   | 5664.4  | 948707.2  | 32637.4   | 5637251.4   | 6341721.5   | 12.3    |
| RR0010000         | PA JUNDIÁ                  | 1600.1    | 297522.5    | 0.0 | 0.0 | 336.9     | 62823.7     | 1056.0 | 191617.9   | 10228.9 | 1901556.0 | 11621.8   | 2155997.6   | 2453520.2   | 79.6    |
| RR0011000         | PA LADEIRÃO                | 1329.0    | 247618.7    | 0.0 | 0.0 | 16763.1   | 3131373.4   | 365.6  | 68328.3    | 26.1    | 4868.9    | 17154.7   | 3204570.6   | 3452189.4   |         |
| RR0013000         | PA INTEGRAÇÃO              | 10802.7   | 2014935.4   | 0.0 | 0.0 | 16088.9   | 3006626.0   |        |            | 170.5   | 31856.5   | 16259.4   | 3038482.4   | 5053417.8   |         |
| RR0014000         | PA RR-170                  | 10620.6   | 1978442.9   | 0.0 | 0.0 | 16782.2   | 3136192.7   | 8472.1 | 1582409.7  | 5020.1  | 938178.0  | 30274.3   | 5656780.5   | 7635223.4   |         |
| RR0015000         | PA ITA                     | 2381.3    | 442795.6    | 0.0 | 0.0 | 4381.2    | 818689.2    | 318.4  | 59503.8    | 3129.3  | 584623.3  | 7828.9    | 1462816.3   | 1905611.9   |         |
| RR0016000         | PA JAPÃO                   | 7518.7    | 1324255.9   | 0.0 | 0.0 | 5892.3    | 984059.9    | 264.9  | 49509.9    | 7287.9  | 1311336.2 | 13445.2   | 2344906.1   | 3669162.0   |         |
| RR0017000         | PA NOVO PARAISO            | 503.7     | 94127.9     | 0.0 | 0.0 | 1852.3    | 346176.2    | 5773.8 | 1079064.2  | 1729.0  | 323130.1  | 9355.1    | 1748370.5   | 1842498.4   |         |
| RR0018000         | PA CUJUBIM                 | 3157.4    | 530866.9    | 0.0 | 0.0 | 4151.4    | 771409.8    | 539.6  | 52451.9    | 6341.5  | 1180835.0 | 11032.5   | 2004696.7   | 2535563.6   |         |
| RR0020000         | PA VILA NOVA               | 5096.4    | 816981.8    | 0.0 | 0.0 | 10149.9   | 1644608.5   | 57.1   | 9304.4     | 6.2     | 1014.8    | 10213.2   | 1654927.7   | 2471909.5   |         |
| RR0021000         | PA SERRA DOURADA           | 6662.0    | 1242769.1   | 0.0 | 0.0 | 12038.1   | 2247855.6   | 8.6    | 1610.4     | 6284.5  | 1172330.3 | 18331.1   | 3421796.3   | 4664565.4   |         |

|           |                     |         |           |     |     |         |            |       |           |         |           |         |            |            |       |
|-----------|---------------------|---------|-----------|-----|-----|---------|------------|-------|-----------|---------|-----------|---------|------------|------------|-------|
| RR0022000 | PA QUITAUAUÍ        | 6950.1  | 1059265.1 | 0.0 | 0.0 | 7027.5  | 1078669.5  |       |           | 3041.5  | 464047.3  | 10069.0 | 1542716.8  | 2601982.0  |       |
| RR0023000 | PA SÃO JOSE         | 1783.1  | 304472.0  | 0.0 | 0.0 | 323.7   | 53742.4    |       |           | 2204.8  | 364044.9  | 2528.5  | 417787.3   | 722259.3   |       |
| RR0024000 | PA SAMAUMA          | 19388.3 | 3107716.5 | 0.0 | 0.0 | 29457.2 | 4759696.3  | 624.0 | 44113.6   | 136.4   | 22233.3   | 30217.7 | 4826043.2  | 7933759.6  | 13.5  |
| RR0025000 | PA TABOCA           | 5551.4  | 1037395.0 | 0.0 | 0.0 | 7996.4  | 1494440.2  | 18.4  | 2135.7    | 7463.4  | 1394838.2 | 15478.2 | 2891414.1  | 3928809.0  |       |
| RR0026000 | PA MARANHÃO         | 6878.4  | 1090291.1 | 0.0 | 0.0 | 7130.3  | 1157051.6  | 21.8  | 3913.3    | 5043.1  | 792161.8  | 12195.2 | 1953126.7  | 3043417.7  |       |
| RR0027000 | PA ESPERANÇA        | 1484.6  | 277394.4  | 0.0 | 0.0 | 2062.6  | 385469.7   |       |           | 370.8   | 69286.3   | 2433.4  | 454756.0   | 732150.3   |       |
| RR0028000 | PA RIO DIAS         | 1707.7  | 319154.7  | 0.0 | 0.0 | 3625.9  | 676686.5   | 7.8   | 296.4     | 3960.4  | 734333.0  | 7594.1  | 1411315.9  | 1730470.6  |       |
| RR0029000 | PA UNIÃO            | 4527.2  | 846009.3  | 0.0 | 0.0 | 9194.6  | 1718308.1  | 6.5   | 1209.8    | 4155.1  | 776541.3  | 13356.2 | 2496059.2  | 3342068.5  |       |
| RR0030000 | PA BOM SUCESSO      | 7212.5  | 1344153.8 | 0.0 | 0.0 | 11414.1 | 2132847.2  |       |           | 695.2   | 129924.7  | 12109.4 | 2262771.9  | 3606925.7  |       |
| RR0031000 | PA CAXIAS           | 9802.6  | 1825844.6 | 0.0 | 0.0 | 14012.4 | 2618368.6  |       |           | 11095.6 | 2073478.7 | 25107.9 | 4691847.3  | 6517692.0  |       |
| RR0032000 | PA SÃO LUIZÃO       | 5087.0  | 949672.1  | 0.0 | 0.0 | 5035.1  | 940985.7   |       |           | 2782.6  | 520039.6  | 7817.7  | 1461025.4  | 2410697.5  |       |
| RR0033000 | PA MASSARANDUBA     | 10491.0 | 1759216.8 | 0.0 | 0.0 | 20910.7 | 3476508.9  | 642.7 | 119662.6  | 4375.3  | 787339.7  | 25928.7 | 4383511.3  | 6142728.1  |       |
| RR0034000 | PA VILENA           | 1599.6  | 298945.4  | 0.0 | 0.0 | 2471.6  | 461919.5   | 827.5 | 154651.1  | 4546.0  | 849604.3  | 7845.1  | 1466174.9  | 1765120.3  |       |
| RR0035000 | PA BOM JESUS        | 1759.5  | 286187.6  | 0.0 | 0.0 | 11815.9 | 1866264.6  | 3     | 356146.5  | 1729.0  | 268524.6  | 15860.3 | 2490935.7  | 2777123.3  | 5.6   |
| RR0036000 | PA AMAJARI          | 1061.7  | 162545.1  | 0.0 | 0.0 | 14194.3 | 2179275.5  | 2230. | 341742.2  | 693.3   | 106537.9  | 17117.8 | 2627555.6  | 2790100.8  | 355.9 |
| RR0037000 | PA NOVA<br>AMAZONIA | 0.0     | 0.0       | 0.0 | 0.0 | 51.4    | 6013.1     | 3521  | 948434.9  | 1.1     | 123.3     | 35269.4 | 954571.4   | 954571.4   | 177.7 |
| RR0038000 | PA JACAMIM          | 288.9   | 50402.2   | 0.0 | 0.0 | 587.4   | 109202.8   |       |           | 1666.3  | 309034.1  | 2253.7  | 418236.9   | 468639.1   |       |
| RR0039000 | PA TATAJUBA         | 2011.1  | 375860.9  | 0.0 | 0.0 | 13064.1 | 2441544.8  |       |           | 7709.3  | 1440791.5 | 20773.4 | 3882336.3  | 4258197.1  |       |
| RR0040000 | PA AJARANI          | 7382.2  | 1241455.8 | 0.0 | 0.0 | 82059.7 | 14160027.6 | 91.1  | 15771.1   | 34871.8 | 5917482.7 | 117022. | 20093281.4 | 21334737.2 |       |
| RR0041000 | PA PAU RAINHA       | 671.3   | 125455.1  | 0.0 | 0.0 | 10690.7 | 1997980.5  | 6564. |           |         |           |         |            |            |       |
| RR0042000 | PA CUIUBA           | 761.4   | 142295.3  | 0.0 | 0.0 | 7259.1  | 1356658.4  | 5     | 1226833.6 | 468.2   | 87494.5   | 17723.3 | 3312308.6  | 3437763.7  |       |
| RR0043000 | PA CASTANHEIRA      | 353.4   | 66055.4   | 0.0 | 0.0 | 5479.8  | 1024125.4  | 400.9 | 74925.9   | 5224.5  | 976414.0  | 12884.6 | 2407998.3  | 2550293.7  |       |
| RR0044000 | PA ANGELIN          | 361.6   | 67580.7   | 0.0 | 0.0 | 1249.6  | 233528.9   | 1511. | 9947.2    | 3939.8  | 736311.3  | 5242.6  | 979787.3   | 1047368.1  |       |
| RR0045000 | PA SERINGUEIRA      | 1327.9  | 248173.3  | 0.0 | 0.0 | 10167.1 | 1900137.1  | 0     | 182187.7  | 623.5   | 116519.8  | 11765.4 | 2198844.6  | 2447017.9  |       |
| RR0046000 | PA JATOBA           | 1689.2  | 315694.1  | 0.0 | 0.0 | 11954.5 | 2234180.0  |       |           | 5936.4  | 1109457.4 | 17890.9 | 3343637.4  | 3659331.5  |       |
| RR0049000 | PA RENASCER         | 80.3    | 9280.2    | 0.0 | 0.0 | 221.5   | 27381.4    | 2097. |           |         |           |         |            |            |       |
| RR0051000 | PA PAU- BRASIL      | 68.7    | 12841.8   | 0.0 | 0.0 | 20721.9 | 3872708.8  | 3     | 737985.4  | 4349.9  | 812960.5  | 29020.6 | 5423654.7  | 5436496.5  |       |
| RR0052000 | PA TERRA NOVA       | 1265.5  | 234983.5  | 0.0 | 0.0 | 2023.9  | 376734.8   | 3948. |           |         |           |         |            |            |       |
|           |                     |         |           |     |     |         |            | 8     |           | 145.8   | 26849.1   | 2169.7  | 403583.9   | 638567.5   |       |

|                  |                    |          |            |        |          |          |             |        |           |          |            |          |             |             |
|------------------|--------------------|----------|------------|--------|----------|----------|-------------|--------|-----------|----------|------------|----------|-------------|-------------|
| RR0053000        | PA SERRA TALHADA   | 697.8    | 130414.3   | 0.0    | 0.0      | 1215.4   | 227136.9    |        |           | 1335.7   | 249634.9   | 2551.1   | 476771.8    | 607186.1    |
| RR0054000        | PA ARCO-ÍRIS       | 348.5    | 59861.0    | 0.0    | 0.0      | 8518.9   | 1556489.4   | 1310.  |           |          |            |          |             |             |
| RR0055000        | PA TALISMÃ         | 133.1    | 23901.9    | 0.0    | 0.0      | 1661.1   | 310214.8    | 0      | 244803.3  | 5736.8   | 1063262.9  | 15565.7  | 2864555.6   | 2924416.7   |
| RR0056000        | PA NOVA FLORESTA   | 649.3    | 114155.7   | 0.0    | 0.0      | 6766.2   | 1206331.4   | 421.7  | 78807.8   | 513.2    | 95909.3    | 2595.9   | 484931.8    | 508833.7    |
| RR0073000        | PA ALTO ARRAIA     | 85.8     | 7777.8     | 0.0    | 0.0      | 555.3    | 70250.9     | 183.4  | 18819.6   | 382.5    | 42987.2    | 2062.1   | 132057.7    | 139835.5    |
|                  | Total in Roraima   | 331480.7 | 59476518.9 | 0.0    | 0.0      | 689776.5 | 122564323.0 | 1124.4 | 8453659.9 | 218400.8 | 39423692.0 | 988148.3 | 170441674.9 | 229918193.8 |
| <b>TOCANTINS</b> |                    |          | 0.0        | 0.0    | 0.0      |          |             |        |           |          |            | 0.0      | 0.0         | 0.0         |
| TO0004000        | PA AMARRIO         | 0.0      | 0.0        | 1403.3 | 46295.4  |          |             | 967.5  | 31916.3   |          |            | 967.5    | 31916.3     | 78211.7     |
| TO0005000        | PA SÃO JOÃO        | 0.0      | 0.0        | 1308.4 | 51844.2  |          |             | 2775.7 |           |          |            | 2775.7   | 132332.4    | 184176.5    |
| TO0006000        | PA CACHOEIRA       | 0.0      | 0.0        | 3376.8 | 111400.7 |          |             | 1399.7 | 46174.8   |          |            | 1399.7   | 46174.8     | 157575.5    |
| TO0007000        | PA CAMARÃO         | 1027.6   | 153940.7   | 212.7  | 31862.0  | 224.4    | 33616.3     | 89.3   | 13383.6   |          |            | 313.7    | 46999.9     | 232802.6    |
| TO0008000        | PA MONTES ALTOS    | 353.8    | 46827.7    | 29.4   | 4407.2   | 113.7    | 17033.0     |        |           |          |            | 113.7    | 17033.0     | 68268.0     |
| TO0009000        | PA ALEGRE          | 1650.7   | 269009.2   | 0.0    | 0.0      | 8.3      | 1346.1      |        |           |          |            | 8.3      | 1346.1      | 270355.3    |
| TO0010000        | PA SÃO PEDRO       | 0.0      | 0.0        | 3739.1 | 123353.1 |          |             | 1808.5 | 59663.6   |          |            | 1808.5   | 59663.6     | 183016.8    |
| TO0011000        | PA GROTAO          | 1685.9   | 173686.9   | 13.5   | 2025.3   | 31.0     | 4641.9      |        |           |          |            | 31.0     | 4641.9      | 180354.2    |
| TO0012000        | PA BARROCA         | 503.9    | 16624.7    | 620.5  | 20470.2  | 217.6    | 7180.0      | 1327.2 | 43784.0   |          |            | 1544.8   | 50964.0     | 88058.9     |
| TO0013000        | PA SÃO SALVADOR    | 0.0      | 0.0        | 843.0  | 40573.1  |          |             | 874.4  | 45530.3   |          |            | 874.4    | 45530.3     | 86103.4     |
| TO0014000        | PA SERRA TAQUARUÇU | 0.0      | 0.0        | 421.4  | 15090.8  |          |             | 1574.4 | 53953.9   |          |            | 1574.4   | 53953.9     | 69044.6     |
| TO0015000        | PA LAGOÃO          | 0.0      | 0.0        | 7518.8 | 422664.0 | 0.0      | 0.6         | 3930.2 | 244230.7  |          |            | 3930.2   | 244231.3    | 666895.3    |
| TO0016000        | PA JUARINA         | 26961.6  | 4519599.5  | 0.0    | 0.0      | 382.8    | 66750.5     | 3428.5 | 561743.6  |          |            | 3811.3   | 628494.1    | 5148093.6   |
| TO0017000        | PA PONTAL          | 590.4    | 86054.5    | 37.7   | 5646.7   | 218.2    | 32670.1     |        |           |          |            | 218.2    | 32670.1     | 124371.4    |
| TO0018000        | PA TOBASA          | 1629.7   | 304578.6   | 0.0    | 0.0      | 85.3     | 15940.6     | 194.5  | 36323.3   |          |            | 279.8    | 52264.0     | 356842.6    |
| TO0019000        | PA SANTO ANTÔNIO   | 0.0      | 0.0        | 2534.6 | 83617.8  |          |             | 909.2  | 29993.7   |          |            | 909.2    | 29993.7     | 113611.5    |
| TO0020000        | PA BAIÃO           | 0.0      | 0.0        | 1345.4 | 48234.4  |          |             | 4567.3 | 180612.5  |          |            | 4567.3   | 180612.5    | 228846.9    |
| TO0021000        | PA SÃO JORGE       | 1871.1   | 234757.4   | 43.0   | 5285.4   | 84.2     | 12615.1     |        |           |          |            | 84.2     | 12615.1     | 252657.8    |
| TO0022000        | PA PRAIA NORTE     | 2942.5   | 441222.9   | 714.6  | 107058.4 | 507.5    | 76021.9     | 363.6  | 54476.3   |          |            | 871.1    | 130498.1    | 678779.5    |
| TO0023000        | PA SANTA CRUZ II   | 9985.9   | 1866112.2  | 0.0    | 0.0      | 242.7    | 45362.1     | 314.7  | 58816.3   |          |            | 557.4    | 104178.4    | 1970290.6   |

|           |                       |        |           |         |          |       |          |        |          |          |        |          |           |       |
|-----------|-----------------------|--------|-----------|---------|----------|-------|----------|--------|----------|----------|--------|----------|-----------|-------|
| TO0024000 | PA CAMARÃO II         | 3067.4 | 459531.3  | 173.8   | 26033.3  | 837.7 | 125494.4 | 112.0  | 16779.7  |          | 949.7  | 142274.0 | 627838.6  |       |
| TO0025000 | PA TRÊCHO SECO        | 844.2  | 154615.0  | 0.0     | 0.0      |       |          |        |          |          | 0.0    | 0.0      | 154615.0  |       |
| TO0026000 | PA JUARI              | 4755.4 | 736209.6  | 0.0     | 0.0      | 47.9  | 7825.8   |        |          |          | 47.9   | 7825.8   | 744035.5  |       |
| TO0027000 | PA ESPERANTINA        | 1031.8 | 192839.7  | 0.0     | 0.0      | 17.2  | 3222.6   | 558.9  | 104462.1 |          | 576.2  | 107684.7 | 300524.4  |       |
| TO0028000 | PA JENIPAPO           | 1271.6 | 212570.9  | 0.0     | 0.0      |       |          |        |          |          | 0.0    | 0.0      | 212570.9  |       |
| TO0029000 | PA ARAGUAIALA         | 164.5  | 30752.7   | 0.0     | 0.0      | 26.0  | 4855.9   | 7      | 2035.7   | 380458.3 | 2061.7 | 385314.1 | 416066.9  | 15.2  |
| TO0031000 | PA BANDEIRANTES       | 847.6  | 112988.6  | 0.0     | 0.0      |       |          |        |          |          | 0.0    | 0.0      | 112988.6  |       |
| TO0032000 | PA PENHA              | 0.0    | 0.0       | 18415.5 | 644947.1 |       |          |        |          |          | 1263.4 | 529668.7 | 1174615.8 | 10.7  |
| TO0034000 | PA REVOLUÇÃO          | 0.0    | 0.0       | 900.1   | 30398.7  |       |          |        |          |          | 1607.7 | 53969.2  | 84367.9   |       |
| TO0035000 | PA BOA ESPERANÇA      | 1799.4 | 336291.1  | 0.0     | 0.0      | 140.7 | 26303.9  | 509.2  | 94643.2  |          | 650.0  | 120947.1 | 457238.2  | 19.6  |
| TO0036000 | PA LAGO PRETO         | 383.8  | 71724.1   | 0.0     | 0.0      |       |          |        |          |          | 2072.6 | 387355.8 | 459079.9  | 52.3  |
| TO0037000 | PA OURO VERDE         | 5476.4 | 1022370.6 | 0.0     | 0.0      | 255.2 | 47687.3  |        |          |          | 255.2  | 47687.3  | 1070057.9 |       |
| TO0038000 | PA BANDEIRANTE        | 0.0    | 0.0       | 852.9   | 65877.1  |       |          |        |          |          | 192.5  | 14872.5  | 80749.6   |       |
| TO0039000 | PA DOIS RIACHOS       | 4915.2 | 825219.0  | 0.0     | 0.0      | 78.7  | 13220.3  |        |          |          | 78.7   | 13220.3  | 838439.3  | 4.5   |
| TO0040000 | PA ALMECEGAS          | 0.0    | 0.0       | 1257.7  | 45467.7  |       |          |        |          |          | 609.0  | 33454.1  | 78921.8   | 182.7 |
| TO0041000 | PA RIO PRETO          | 4173.0 | 428312.2  | 0.0     | 0.0      | 867.9 | 70411.6  | 4851.2 | 377962.5 |          | 5719.2 | 448374.1 | 876686.3  |       |
| TO0042000 | PA MULATOS            | 2413.7 | 451097.0  | 0.0     | 0.0      | 125.7 | 23499.8  |        |          |          | 125.7  | 23499.8  | 474596.8  |       |
| TO0043000 | PA AREIAS             | 0.0    | 0.0       | 734.5   | 24230.2  |       |          |        |          |          | 1981.4 | 65365.4  | 89595.7   |       |
| TO0044000 | PA CABECEIRA DO PRATA | 0.0    | 0.0       | 182.1   | 6007.5   |       |          |        |          |          | 1.2    | 40.9     | 6048.4    |       |
| TO0045000 | PA CAIAPOZINHO        | 0.0    | 0.0       | 436.2   | 15666.6  |       |          |        |          |          | 1645.7 | 67484.0  | 83150.6   |       |
| TO0046000 | PA MURICIZAL          | 5364.9 | 900184.9  | 0.0     | 0.0      | 110.5 | 18454.9  |        |          |          | 110.5  | 18454.9  | 918639.9  |       |
| TO0047000 | PA ANDORINHA          | 3564.7 | 583643.0  | 0.0     | 0.0      | 169.8 | 28463.1  |        |          |          | 169.8  | 28463.1  | 612106.0  |       |
| TO0048000 | PA CAJUEIRO           | 976.7  | 159169.7  | 76.9    | 12531.6  | 126.6 | 20624.2  | 860.2  | 140188.8 |          | 986.8  | 160813.0 | 332514.3  |       |
| TO0049000 | PA CUPIM              | 0.0    | 0.0       | 1133.8  | 165563.2 | 0.5   | 75.3     | 4212.7 | 594755.3 |          | 4213.2 | 594830.6 | 760393.8  |       |
| TO0050000 | PA MATA BONITA I      | 194.2  | 29116.1   | 0.0     | 0.0      |       |          |        |          |          | 0.0    | 0.0      | 29116.1   | 1.6   |
| TO0052000 | PA SURUBIM            | 0.0    | 0.0       | 351.5   | 11597.0  |       |          |        |          |          | 1349.8 | 44529.2  | 56126.2   |       |
| TO0054000 | PA UNIÃO              | 0.0    | 0.0       | 418.0   | 5338.4   |       |          |        |          |          | 1233.3 | 20166.6  | 25505.0   |       |
| TO0055000 | PA EXTREMA            | 2319.2 | 377963.6  | 0.0     | 0.0      | 241.0 | 39283.0  |        |          |          | 241.0  | 39283.0  | 417246.5  |       |

|           |                        |        |           |        |          |        |          |             |          |      |         |           |           |           |
|-----------|------------------------|--------|-----------|--------|----------|--------|----------|-------------|----------|------|---------|-----------|-----------|-----------|
| TO0056000 | PA BICO DO<br>PAPAGAIO | 228.3  | 42664.0   | 0.0    | 0.0      |        |          | 688.1       | 122749.5 |      | 688.1   | 122749.5  | 165413.5  | 24.6      |
| TO0058000 | PA TOCANTINS           | 0.0    | 0.0       | 0.0    | 0.0      |        |          | 1162.<br>9  | 215116.1 |      | 1162.9  | 215116.1  | 215116.1  | 40.1      |
| TO0068000 | PA ÁGUA LIMPA          | 734.7  | 136149.3  | 0.0    | 0.0      | 43.9   | 8213.1   |             |          |      | 43.9    | 8213.1    | 144362.4  |           |
| TO0069000 | PA CAPELINHA           | 0.0    | 0.0       | 1409.3 | 46494.4  |        |          | 273.6       | 9027.4   |      | 273.6   | 9027.4    | 55521.7   |           |
| TO0070000 | PA NOVA VIDA           | 477.8  | 77560.3   | 0.0    | 0.0      | 1.0    | 155.4    |             |          |      | 1.0     | 155.4     | 77715.7   |           |
| TO0071000 | PA RETIRO              | 0.0    | 0.0       | 401.6  | 11807.5  |        |          | 788.2       | 30274.2  |      | 788.2   | 30274.2   | 42081.7   | 307.2     |
| TO0072000 | PA RONCA               | 2760.8 | 449928.4  | 38.4   | 6260.0   | 603.0  | 98265.2  | 114.2       | 18606.5  |      | 717.1   | 116871.7  | 573060.1  |           |
| TO0073000 | PA SÃO JORGE II        | 752.7  | 84822.6   | 13.7   | 2057.1   | 99.7   | 14940.7  |             |          |      | 99.7    | 14940.7   | 101820.4  |           |
| TO0074000 | PA JACUBINHA           | 0.0    | 0.0       | 639.5  | 53302.9  |        |          | 5679.<br>8  | 346324.0 |      | 5679.8  | 346324.0  | 399626.9  |           |
| TO0076000 | PA SUDAN               | 4131.9 | 675636.7  | 0.0    | 0.0      | 0.1    | 4.7      | 1394.<br>9  | 108384.7 |      | 1395.0  | 108389.4  | 784026.1  |           |
| TO0077000 | PA FILADÉLFIA          | 3197.3 | 536786.4  | 0.0    | 0.0      |        |          |             |          |      | 0.0     | 0.0       | 536786.4  |           |
| TO0078000 | PA TAMBORIL            | 1154.9 | 188209.0  | 112.2  | 18287.9  | 34.0   | 5543.2   | 2703.<br>2  | 440545.7 |      | 2737.2  | 446088.9  | 652585.8  |           |
| TO0079000 | PA RIACHINHO           | 2958.6 | 482165.6  | 0.0    | 0.0      | 108.6  | 17703.6  | 9.7         | 1582.1   |      | 118.3   | 19285.7   | 501451.3  |           |
| TO0080000 | PA COLORADO            | 2486.9 | 405282.9  | 0.0    | 0.0      | 90.7   | 14787.5  |             |          |      | 90.7    | 14787.5   | 420070.4  |           |
| TO0081000 | PA CASA DO MORRO       | 1749.1 | 285049.0  | 0.0    | 0.0      | 191.4  | 31188.1  |             |          |      | 191.4   | 31188.1   | 316237.1  |           |
| TO0083000 | PA REIS                | 4215.9 | 632530.8  | 206.2  | 30904.3  | 653.0  | 97908.2  | 705.4       | 108946.3 |      | 1358.4  | 206854.5  | 870289.5  |           |
| TO0084000 | PA PORTELA             | 450.5  | 84187.2   | 0.0    | 0.0      | 65.7   | 12276.6  | 590.1       | 108896.4 |      | 655.8   | 121173.0  | 205360.2  | 0.2       |
| TO0085000 | PA RIO PRATA           | 0.0    | 0.0       | 2124.5 | 70086.3  |        |          | 527.2       | 17393.4  |      | 527.2   | 17393.4   | 87479.7   |           |
| TO0086000 | PA ARAGUAMINAS         | 299.0  | 9865.4    | 503.8  | 16620.9  | 28.3   | 934.1    | 1555.<br>4  | 51314.1  |      | 1583.8  | 52248.2   | 78734.6   |           |
| TO0087000 | PA LOROTY              | 3092.9 | 422332.0  | 6431.1 | 386072.8 | 3986.6 | 558872.4 | 2582<br>1.2 | 787890.8 |      | 29807.7 | 1346763.2 | 2155168.1 | 291.7     |
| TO0088000 | PA SÃO PAULO           | 0.0    | 0.0       | 2180.9 | 351075.8 |        |          | 2607.<br>4  | 418658.9 |      | 2607.4  | 418658.9  | 769734.7  |           |
| TO0089000 | PA SÃO JOSÉ            | 3102.9 | 579309.2  | 0.0    | 0.0      |        |          |             |          |      | 0.0     | 0.0       | 579309.2  |           |
| TO0090000 | PA SÃO FRANCISCO       | 1196.4 | 179231.2  | 81.0   | 12127.4  | 522.0  | 78194.3  |             |          |      | 522.0   | 78194.3   | 269552.9  |           |
| TO0091000 | PA VENTURA             | 7152.6 | 1162755.5 | 39.0   | 5982.2   | 499.7  | 79598.0  |             |          | 30.2 | 4029.7  | 529.9     | 83627.7   | 1252365.4 |
| TO0092000 | PA UNIÃO II            | 0.0    | 0.0       | 595.2  | 19630.5  |        |          | 689.3       | 22739.1  |      | 689.3   | 22739.1   | 42369.5   |           |
| TO0093000 | PA SANTA MARTA         | 2288.9 | 373016.1  | 0.0    | 0.0      | 281.7  | 45908.4  |             |          |      | 281.7   | 45908.4   | 418924.5  |           |
| TO0094000 | PA MANTIQUEIRA         | 1473.5 | 240130.4  | 0.0    | 0.0      | 443.5  | 72282.4  |             |          |      | 443.5   | 72282.4   | 312412.8  |           |
| TO0095000 | PA BAVIERA             | 3126.9 | 515646.6  | 0.0    | 0.0      | 1471.8 | 240295.8 |             |          |      | 1471.8  | 240295.8  | 755942.4  |           |

|           |                            |        |          |        |          |        |          |        |          |      |         |          |           |          |
|-----------|----------------------------|--------|----------|--------|----------|--------|----------|--------|----------|------|---------|----------|-----------|----------|
| TO0096000 | PA NOSSA SENHORA APARECIDA | 2099.9 | 325443.5 | 0.0    | 0.0      | 135.3  | 22282.1  |        |          |      | 135.3   | 22282.1  | 347725.7  |          |
| TO0097000 | PA ATANASIO                | 2504.7 | 400060.5 | 0.0    | 0.0      | 368.1  | 59868.0  |        |          |      | 368.1   | 59868.0  | 459928.6  | 22.6     |
| TO0098000 | PA MARCOS FREIRE           | 2485.8 | 398299.0 | 0.0    | 0.0      | 200.3  | 32471.4  |        |          |      | 200.3   | 32471.4  | 430770.4  |          |
| TO0099000 | PA PADRE JOSIMO            | 1523.6 | 248301.6 | 0.0    | 0.0      | 86.4   | 14073.3  | 2.6    | 426.9    |      | 89.0    | 14500.2  | 262801.8  |          |
| TO0100000 | PA DONA EUNICE             | 2242.2 | 365087.6 | 0.0    | 0.0      | 192.7  | 31350.0  |        |          |      | 192.7   | 31350.0  | 396437.6  | 0.0      |
| TO0101000 | PA GAMELEIRA               | 0.0    | 0.0      | 5514.5 | 103426.0 | 0.0    | 0.6      | 4511.4 | 89452.3  |      | 4511.4  | 89452.9  | 192879.0  |          |
| TO0102000 | PA BARONESA                | 0.0    | 0.0      | 375.7  | 12392.8  |        |          | 1223.7 | 40371.1  |      | 1223.7  | 40371.1  | 52764.0   |          |
| TO0103000 | PA VERA CRUZ               | 2033.4 | 215515.6 | 0.0    | 0.0      | 207.7  | 16986.5  |        |          |      | 207.7   | 16986.5  | 232502.2  |          |
| TO0104000 | PA AGUA BRANCA             | 2076.5 | 97569.2  | 3275.9 | 109515.4 | 96.3   | 3177.4   | 2511.0 | 846503.2 |      | 25206.4 | 849680.6 | 1056765.2 |          |
| TO0105000 | PA SANTA HELENA            | 525.9  | 98288.0  | 0.0    | 0.0      | 23.9   | 4465.1   |        |          |      | 23.9    | 4465.1   | 102753.1  | 1.1      |
| TO0106000 | PA CARACOL                 | 1369.5 | 196977.6 | 4736.6 | 145255.3 | 2174.8 | 309438.2 | 8738.4 | 246900.9 |      | 10913.2 | 556339.1 | 898572.0  | 43.3     |
| TO0107000 | PA PALMEIRAS               | 1066.6 | 118153.4 | 670.0  | 40484.6  | 170.0  | 23763.0  | 125.1  | 9373.2   |      | 295.1   | 33136.3  | 191774.2  |          |
| TO0108000 | PA ÁGUA FRIA               | 0.0    | 0.0      | 434.5  | 14334.2  |        |          | 785.5  | 27091.4  |      | 785.5   | 27091.4  | 41425.6   |          |
| TO0109000 | PA GROTA DO LAGE           | 1994.1 | 322103.9 | 0.0    | 0.0      | 43.8   | 7349.9   | 877.2  | 93805.4  | 15.0 | 2513.4  | 935.9    | 103668.6  | 425772.5 |
| TO0110000 | PA SÃO MIGUEL              | 0.0    | 0.0      | 314.4  | 5592.9   |        |          | 2104.2 | 39195.2  |      | 2104.2  | 39195.2  | 44788.0   |          |
| TO0111000 | PA MUTIRÃO                 | 1628.4 | 282749.6 | 0.0    | 0.0      |        |          |        |          |      | 0.0     | 0.0      | 282749.6  |          |
| TO0112000 | PA TRANSARAGUAIA           | 836.5  | 136330.0 | 232.4  | 37876.3  | 26.2   | 4267.0   | 722.9  | 117817.8 |      | 749.1   | 122084.7 | 296290.9  |          |
| TO0113000 | PA PROFESSORA DJANIRA      | 1409.5 | 229712.8 | 0.0    | 0.0      |        |          |        |          |      | 0.0     | 0.0      | 229712.8  |          |
| TO0114000 | PA SANTA CLARA             | 161.8  | 11281.9  | 2082.2 | 84714.8  | 357.2  | 32854.7  | 9717.4 | 400721.4 |      | 10074.6 | 433576.1 | 529572.8  | 26.3     |
| TO0115000 | PA SÃO LUIZ                | 0.0    | 0.0      | 2901.2 | 96906.1  |        |          | 922.8  | 36975.3  |      | 922.8   | 36975.3  | 133881.4  |          |
| TO0116000 | PA BOA SORTE               | 1088.7 | 193671.8 | 265.3  | 43233.0  |        |          | 55.1   | 9091.6   |      | 55.1    | 9091.6   | 245996.4  |          |
| TO0117000 | PA RANCHO ALEGRE           | 1085.6 | 162637.9 | 8.6    | 1399.3   | 232.2  | 34857.3  | 300.7  | 47224.7  |      | 532.9   | 82082.0  | 246119.2  |          |
| TO0118000 | PA VINICIUS                | 1066.7 | 111149.8 | 265.0  | 41809.2  | 104.4  | 12729.3  | 1749.9 | 279744.5 |      | 1854.2  | 292473.8 | 445432.8  |          |
| TO0120000 | PA FIRMEZA                 | 0.0    | 0.0      | 364.8  | 12128.2  |        |          | 779.0  | 27260.0  |      | 779.0   | 27260.0  | 39388.1   |          |
| TO0124000 | PA DOIS CORAÇÕES           | 2817.5 | 468443.1 | 0.0    | 0.0      | 281.7  | 46138.5  |        |          |      | 281.7   | 46138.5  | 514581.6  |          |
| TO0125000 | PA PIRARUCU                | 0.0    | 0.0      | 3910.9 | 132003.5 |        |          | 2513.5 | 87128.6  |      | 2513.5  | 87128.6  | 219132.1  |          |
| TO0126000 | PA TRÊS PODERES            | 0.0    | 0.0      | 1684.7 | 41992.6  |        |          | 430.7  | 29508.3  |      | 430.7   | 29508.3  | 71500.9   | 63.0     |
| TO0127000 | PA MARINGA                 | 3079.2 | 511315.6 | 12.2   | 1984.2   | 176.1  | 28698.6  |        |          |      | 176.1   | 28698.6  | 541998.5  |          |

|           |                      |         |           |        |         |        |          |        |          |        |          |           |       |
|-----------|----------------------|---------|-----------|--------|---------|--------|----------|--------|----------|--------|----------|-----------|-------|
| TO0128000 | PA TRÊS IRMÃOS       | 4373.9  | 712193.1  | 24.1   | 3928.0  | 290.7  | 47371.9  |        |          | 290.7  | 47371.9  | 763493.0  |       |
| TO0129000 | PA SÃO SILVESTRE     | 2445.9  | 382036.5  | 12.5   | 2017.5  | 45.2   | 7369.5   |        |          | 45.2   | 7369.5   | 391423.5  |       |
| TO0130000 | PA SANTA JULIANA     | 2548.3  | 398362.4  | 57.2   | 8757.0  | 414.3  | 62183.8  | 9.3    | 1520.0   | 423.6  | 63703.8  | 470823.2  |       |
| TO0131000 | PA CANAÃ             | 1121.2  | 208189.2  | 0.0    | 0.0     |        |          |        |          | 0.0    | 0.0      | 208189.2  |       |
| TO0132000 | PA PETRÔNIO          | 621.0   | 101199.1  | 0.0    | 0.0     |        |          |        |          | 0.0    | 0.0      | 101199.1  |       |
| TO0133000 | PA NAJÁ              | 678.6   | 106793.3  | 2.9    | 455.0   | 2.0    | 309.5    |        |          | 2.0    | 309.5    | 107557.8  |       |
| TO0134000 | PA FAVEIRA           | 0.0     | 0.0       | 244.8  | 18688.5 |        |          | 976.7  | 68944.9  | 976.7  | 68944.9  | 87633.4   | 35.6  |
| TO0135000 | PA REAL              | 1029.8  | 94548.4   | 0.0    | 0.0     | 12.7   | 1397.4   |        |          | 12.7   | 1397.4   | 95945.8   |       |
| TO0136000 | PA ESTRELA DALVA     | 0.0     | 0.0       | 774.7  | 25116.6 |        |          | 1176.0 | 45439.4  | 1176.0 | 45439.4  | 70556.0   |       |
| TO0138000 | PA PERICATU          | 0.0     | 0.0       | 3244.9 | 92167.5 |        |          | 3503.3 | 109209.4 | 3503.3 | 109209.4 | 201376.9  |       |
| TO0139000 | PA BARRANCO DO MUNDO | 0.0     | 0.0       | 915.4  | 49670.2 |        |          | 3918.0 | 146875.5 | 3918.0 | 146875.5 | 196545.7  | 0.1   |
| TO0140000 | PA TRÊS LAGOAS       | 0.0     | 0.0       | 1302.4 | 44581.7 |        |          | 603.0  | 41756.6  | 603.0  | 41756.6  | 86338.3   |       |
| TO0141000 | PA PRIMOGÊNITO       | 0.0     | 0.0       | 1423.1 | 54761.8 |        |          | 1830.3 | 96027.3  | 1830.3 | 96027.3  | 150789.0  |       |
| TO0142000 | PA TARUMÃ            | 94.1    | 11047.2   | 3657.8 | 80003.1 | 816.9  | 84691.9  | 3722.4 | 106799.0 | 4539.3 | 191491.0 | 282541.2  |       |
| TO0143000 | PA REUNIDAS          | 14136.3 | 2322286.2 | 0.0    | 0.0     | 2231.5 | 363779.8 | 108.2  | 17630.9  | 2339.6 | 381410.6 | 2703696.9 | 0.4   |
| TO0144000 | PA PROVIDÊNCIA       | 11731.5 | 1907833.2 | 0.0    | 0.0     | 206.8  | 34253.3  |        |          | 206.8  | 34253.3  | 1942086.5 |       |
| TO0146000 | PA COCAL             | 1547.5  | 230878.3  | 5.1    | 767.5   | 116.0  | 17382.1  | 205.5  | 30785.9  | 321.5  | 48168.1  | 279813.8  |       |
| TO0147000 | PA SANTA LUZIA       | 0.0     | 0.0       | 712.8  | 55945.6 |        |          | 879.2  | 112185.7 | 879.2  | 112185.7 | 168131.3  |       |
| TO0148000 | PA PEDRA BRANCA      | 555.7   | 90367.6   | 89.5   | 14571.9 | 1542.5 | 251363.9 | 1214.8 | 188371.6 | 2757.3 | 439735.5 | 544675.0  |       |
| TO0149000 | PA ARAGUAIA          | 0.0     | 0.0       | 1121.0 | 44719.0 | 562.2  | 76663.0  | 803.1  | 36093.4  | 1365.3 | 112756.4 | 157475.4  | 119.5 |
| TO0150000 | PA VITORIA RÉGIA     | 4455.6  | 726124.1  | 0.0    | 0.0     | 1993.0 | 324801.3 | 1585.3 | 258354.8 | 3578.3 | 583156.0 | 1309280.1 | 20.8  |
| TO0151000 | PA ALEGRIA           | 0.0     | 0.0       | 35.1   | 601.9   |        |          | 74.1   | 1272.2   | 74.1   | 1272.2   | 1874.1    |       |
| TO0152000 | PA COSTA RICA        | 2447.5  | 398873.0  | 19.9   | 3239.8  | 1416.6 | 230869.6 | 2724.5 | 444012.2 | 4141.1 | 674881.8 | 1076994.7 |       |
| TO0153000 | PA TOLEDO II         | 1.6     | 221.3     | 607.6  | 21303.8 | 320.3  | 43326.1  | 899.9  | 41834.9  | 1220.2 | 85161.0  | 106686.0  | 20.8  |
| TO0154000 | PA MUIRAQUITAN       | 45.8    | 4260.0    | 1920.3 | 18153.3 | 501.3  | 68216.4  | 2573.6 | 26597.1  | 3074.9 | 94813.6  | 117226.8  |       |
| TO0155000 | PA CONSOLAÇÃO        | 0.0     | 0.0       | 1266.9 | 42515.4 |        |          | 784.5  | 35890.1  | 784.5  | 35890.1  | 78405.5   |       |
| TO0156000 | PA CALIFÓRNIA        | 985.0   | 93313.6   | 246.7  | 23352.3 | 1418.0 | 200428.2 | 263.2  | 9342.1   | 1681.2 | 209770.3 | 326436.2  |       |
| TO0157000 | PA RECANTO           | 1653.0  | 122603.6  | 0.0    | 0.0     | 434.3  | 31856.4  |        |          | 434.3  | 31856.4  | 154460.0  |       |

|           |                    |        |          |        |          |        |          |          |           |         |           |           |         |          |
|-----------|--------------------|--------|----------|--------|----------|--------|----------|----------|-----------|---------|-----------|-----------|---------|----------|
| TO0158000 | PA CAÇADOR         | 1816.8 | 145144.3 | 0.0    | 0.0      | 1209.7 | 93547.4  |          |           | 1209.7  | 93547.4   | 238691.7  |         |          |
| TO0159000 | PA LIMEIRA         | 2940.0 | 390602.7 | 0.0    | 0.0      | 455.6  | 45640.0  |          |           | 455.6   | 45640.0   | 436242.7  | 2.6     |          |
| TO0160000 | PA I DE JANEIRO    | 0.0    | 0.0      | 1217.7 | 66552.1  |        |          | 2893.1   | 167794.0  | 2893.1  | 167794.0  | 234346.1  |         |          |
| TO0162000 | PA NOVA ESTRELA    | 623.5  | 115862.1 | 0.0    | 0.0      |        |          | 1283.1   | 232607.3  | 1283.1  | 232607.3  | 348469.4  | 1.3     |          |
| TO0163000 | PA BURITIS         | 1988.1 | 319867.4 | 7.7    | 1159.6   | 187.9  | 28160.9  |          |           | 187.9   | 28160.9   | 349188.0  |         |          |
| TO0164000 | PA BOA SORTE II    | 884.6  | 125510.0 | 39.5   | 5925.7   | 24.7   | 3702.4   |          |           | 24.7    | 3702.4    | 135138.2  |         |          |
| TO0165000 | PA SANTA BARBARA   | 983.6  | 145132.1 | 14.9   | 2237.7   | 72.2   | 10822.6  |          |           | 72.2    | 10822.6   | 158192.4  |         |          |
| TO0166000 | PA PINGO D ÁGUA    | 1600.1 | 298827.5 | 0.0    | 0.0      |        |          | 1494.3   | 275227.5  | 1494.3  | 275227.5  | 574055.1  | 15.2    |          |
| TO0167000 | PA SÃO ROQUE       | 2118.8 | 344875.9 | 0.0    | 0.0      | 3.3    | 539.2    |          |           | 3.3     | 539.2     | 345415.1  |         |          |
| TO0168000 | PA ÁGUA FRIA II    | 0.0    | 0.0      | 2626.1 | 89170.5  |        |          | 2999.0   | 126194.7  | 2999.0  | 126194.7  | 215365.2  |         |          |
| TO0171000 | PA SÃO LUCAS       | 859.3  | 135954.8 | 18.5   | 2950.9   | 46.9   | 7055.2   |          |           | 46.9    | 7055.2    | 145960.9  |         |          |
| TO0172000 | PA ALTO BONITO     | 334.8  | 62350.6  | 0.0    | 0.0      |        |          |          |           | 0.0     | 0.0       | 62350.6   |         |          |
| TO0173000 | PA PIRACEMA        | 4519.0 | 661378.0 | 331.3  | 46359.7  | 3827.6 | 541613.0 | 1318.9   | 103225.4  | 5146.5  | 644838.3  | 1352576.0 |         |          |
| TO0174000 | PA TOLEDO I        | 0.0    | 0.0      | 1115.6 | 36803.5  |        |          | 89.6     | 2954.3    | 89.6    | 2954.3    | 39757.8   |         |          |
| TO0175000 | PA MANCHETE        | 214.9  | 22180.6  | 8689.4 | 157431.4 | 1863.9 | 222033.7 | 1357.5.9 | 370280.1  | 15439.8 | 592313.7  | 771925.7  | 241.8   |          |
| TO0176000 | PA TALISMÃ         | 0.0    | 0.0      | 2496.4 | 82354.7  |        |          | 1622.8   | 53537.5   | 1622.8  | 53537.5   | 135892.2  |         |          |
| TO0177000 | PA LAGOA DA ONÇA   | 314.6  | 23448.6  | 9288.9 | 483333.7 | 27.9   | 3172.6   | 7711.7   | 365690.6  | 7739.6  | 368863.2  | 875645.5  |         |          |
| TO0178000 | PA DALILA          | 4144.6 | 676624.2 | 0.0    | 0.0      | 387.2  | 63112.6  |          |           | 387.2   | 63112.6   | 739736.8  |         |          |
| TO0179000 | PA REMANSO         | 0.0    | 0.0      | 249.3  | 6284.6   |        |          | 1922.7   | 61172.7   | 1922.7  | 61172.7   | 67457.2   | 18.7    |          |
| TO0180000 | PA RECREIO         | 0.0    | 0.0      | 676.7  | 97944.3  |        |          | 681.1    | 69567.6   | 681.1   | 69567.6   | 167511.9  |         |          |
| TO0181000 | PA INHUMA          | 3349.1 | 545915.2 | 0.0    | 0.0      | 428.1  | 69775.0  |          |           | 32.6    | 5307.5    | 460.7     | 75082.6 | 620997.8 |
| TO0182000 | PA BANANAL         | 0.0    | 0.0      | 1230.9 | 40606.1  |        |          | 1001.6   | 33044.4   | 1001.6  | 33044.4   | 73650.5   | 2.0     |          |
| TO0183000 | PA RESTINGA        | 51.4   | 9611.7   | 0.0    | 0.0      | 0.0    | 4.1      | 283.9    | 53062.0   | 283.9   | 53066.1   | 62677.8   |         |          |
| TO0184000 | PA VITORIA         | 2440.7 | 397397.4 | 0.0    | 0.0      | 78.0   | 12709.1  |          |           | 78.0    | 12709.1   | 410106.4  |         |          |
| TO0185000 | PA SOLEDADE        | 802.2  | 115985.7 | 482.3  | 32239.4  | 159.9  | 25898.0  | 873.3    | 40804.0   | 1033.2  | 66702.0   | 214927.2  |         |          |
| TO0186000 | PA AMIGOS DA TERRA | 0.0    | 0.0      | 1502.8 | 243731.5 |        |          | 7306.5   | 1175891.7 | 7306.5  | 1175891.7 | 1419623.2 |         |          |
| TO0187000 | PA BARRA BONITA    | 2477.8 | 209449.0 | 43.3   | 3582.0   | 210.9  | 16288.3  |          |           | 64.0    | 4940.4    | 274.8     | 21228.7 | 234259.7 |
| TO0188000 | PA PROGRESSO       | 8016.1 | 766661.2 | 0.0    | 0.0      | 73.2   | 11890.3  |          |           | 73.2    | 11890.3   | 778551.5  |         |          |



|           |                                |        |          |        |          |       |         |        |          |         |          |           |      |
|-----------|--------------------------------|--------|----------|--------|----------|-------|---------|--------|----------|---------|----------|-----------|------|
| TO0189000 | PA CRISTAL                     | 0.0    | 0.0      | 1057.1 | 34873.0  |       |         | 2762.1 | 93557.1  | 2762.1  | 93557.1  | 128430.1  | 23.4 |
| TO0190000 | PA CRISTO REI                  | 959.9  | 161571.1 | 0.0    | 0.0      | 47.1  | 8172.1  | 47.1   | 8172.1   | 47.1    | 8172.1   | 169743.2  |      |
| TO0191000 | PA SANTA FÉ<br>PA SÃO JOÃO     | 888.6  | 69260.6  | 0.0    | 0.0      | 3.7   | 289.5   | 3.7    | 289.5    | 3.7     | 289.5    | 69550.1   |      |
| TO0192000 | BATISTA                        | 1219.9 | 81942.1  | 0.0    | 0.0      | 150.4 | 5179.1  | 150.4  | 5179.1   | 150.4   | 5179.1   | 87121.2   |      |
| TO0193000 | PA FLORESTA                    | 0.0    | 0.0      | 941.2  | 47673.9  |       |         | 2015.9 | 84841.5  | 2015.9  | 84841.5  | 132515.4  |      |
| TO0194000 | PA ENTRE RIOS                  | 0.0    | 0.0      | 921.1  | 35036.4  |       |         | 2233.7 | 82344.9  | 2233.7  | 82344.9  | 117381.3  |      |
| TO0195000 | PA CAPIVARA                    | 0.0    | 0.0      | 860.8  | 23789.9  |       |         | 875.1  | 27883.8  | 875.1   | 27883.8  | 51673.8   |      |
| TO0196000 | PA BREJINHO                    | 0.0    | 0.0      | 1426.7 | 47066.8  |       |         | 1253.0 | 41337.1  | 1253.0  | 41337.1  | 88403.9   |      |
| TO0197000 | PA ITIMIRIM                    | 0.0    | 0.0      | 1238.0 | 40842.0  |       |         | 1153.9 | 38067.6  | 1153.9  | 38067.6  | 78909.6   |      |
| TO0198000 | PA COIMBRA                     | 0.0    | 0.0      | 4147.2 | 144357.6 |       |         | 1068.7 | 35862.3  | 1068.7  | 35862.3  | 180219.9  |      |
| TO0199000 | PA SANTA TEREZA                | 0.0    | 0.0      | 546.4  | 18026.5  |       |         | 1220.0 | 40247.1  | 1220.0  | 40247.1  | 58273.6   |      |
| TO0200000 | PA TALISMÃ II                  | 0.0    | 0.0      | 1445.3 | 47680.7  |       |         | 1165.7 | 38457.0  | 1165.7  | 38457.0  | 86137.7   | 4.5  |
| TO0201000 | PA CONQUISTA                   | 2205.3 | 190029.1 | 0.0    | 0.0      | 9.0   | 725.2   | 9.0    | 725.2    | 9.0     | 725.2    | 190754.3  |      |
| TO0202000 | PA PÉ DO MORRO<br>PA SÃO JUDAS | 0.0    | 0.0      | 462.1  | 5249.7   |       |         | 1088.9 | 23808.0  | 1088.9  | 23808.0  | 29057.7   |      |
| TO0203000 | TADEU                          | 1730.0 | 219589.2 | 5615.2 | 216249.9 | 749.0 | 94604.1 | 1679.6 | 777815.3 | 17545.3 | 872419.4 | 1308258.5 | 1.6  |
| TO0204000 | PA CORREGO FUNDO               | 0.0    | 0.0      | 824.5  | 27199.0  |       |         | 1327.0 | 43776.5  | 1327.0  | 43776.5  | 70975.5   |      |
| TO0205000 | PA NOVO PLANO                  | 0.0    | 0.0      | 85.8   | 1993.5   |       |         | 1173.9 | 32041.1  | 1173.9  | 32041.1  | 34034.5   |      |
| TO0206000 | PA PALMEIRINHA                 | 0.0    | 0.0      | 837.4  | 34450.5  |       |         | 237.7  | 17297.1  | 237.7   | 17297.1  | 51747.5   |      |
| TO0207000 | PA PAU D ARCO                  | 0.0    | 0.0      | 1228.9 | 41927.7  |       |         | 426.4  | 14839.5  | 426.4   | 14839.5  | 56767.3   |      |
| TO0208000 | PA PROGRESSO II                | 0.0    | 0.0      | 394.9  | 13127.5  |       |         | 890.5  | 32646.3  | 890.5   | 32646.3  | 45773.8   |      |
| TO0209000 | PA BELENZINHO                  | 363.5  | 19670.1  | 1623.3 | 16666.2  | 50.1  | 6880.9  | 563.4  | 5668.2   | 613.6   | 12549.1  | 48885.4   |      |
| TO0210000 | PA LONTRA                      | 451.8  | 30505.5  | 18.3   | 172.6    | 65.2  | 8462.0  | 1070.0 | 11725.1  | 1135.2  | 20187.1  | 50865.2   |      |
| TO0211000 | PA MATA AZUL                   | 4489.2 | 639816.3 | 25.3   | 3911.3   | 377.2 | 56061.4 |        |          | 377.2   | 56061.4  | 699789.0  |      |
| TO0212000 | PA SÃO SEBASTIÃO               | 2190.4 | 361187.0 | 0.0    | 0.0      | 70.1  | 11430.3 |        |          | 70.1    | 11430.3  | 372617.4  |      |
| TO0213000 | PA SETECENTOS                  | 604.5  | 43354.4  | 317.4  | 3128.5   | 243.8 | 31365.7 | 2517.6 | 27104.2  | 2761.3  | 58469.9  | 104952.8  |      |
| TO0214000 | PA BABAÇU                      | 777.2  | 117368.5 | 5.7    | 847.9    | 234.4 | 35115.7 |        |          | 234.4   | 35115.7  | 153332.1  |      |
| TO0215000 | PA CHOBÓ                       | 0.0    | 0.0      | 303.9  | 10025.1  |       |         | 2693.6 | 88860.6  | 2693.6  | 88860.6  | 98885.7   |      |

|           |                               |        |          |        |          |        |          |        |          |         |          |          |       |
|-----------|-------------------------------|--------|----------|--------|----------|--------|----------|--------|----------|---------|----------|----------|-------|
| TO0216000 | PA CARAIBINHA                 | 587.4  | 87995.3  | 15.5   | 2322.7   | 54.5   | 8157.5   | 601.6  | 90119.7  | 656.0   | 98277.2  | 188595.2 |       |
| TO0266000 | PA BANDEIRANTE II             | 617.9  | 100701.6 | 3.8    | 619.5    |        |          |        |          | 0.0     | 0.0      | 101321.1 |       |
| TO0267000 | PA SOSSEGO                    | 468.2  | 87443.7  | 0.0    | 0.0      |        |          |        |          | 0.0     | 0.0      | 87443.7  |       |
| TO0268000 | PA ITACOLOMI                  | 1019.8 | 78770.9  | 0.0    | 0.0      |        |          |        |          | 0.0     | 0.0      | 78770.9  |       |
| TO0269000 | PA MAMÉDIO                    | 277.6  | 10154.5  | 5.2    | 250.0    | 2.0    | 273.1    |        |          | 2.0     | 273.1    | 10677.6  |       |
| TO0270000 | PA SÃO JOÃO II                | 566.5  | 84870.8  | 35.8   | 5368.1   | 21.8   | 3259.6   | 832.3  | 124683.2 | 854.0   | 127942.8 | 218181.7 |       |
| TO0271000 | PA FORMOSA                    | 0.0    | 0.0      | 253.1  | 31581.1  |        |          | 4539.9 | 398061.3 | 4539.9  | 398061.3 | 429642.3 | 13.2  |
| TO0272000 | PA RETIRO II                  | 0.0    | 0.0      | 19.4   | 1495.6   |        |          | 1051.8 | 80436.0  | 1051.8  | 80436.0  | 81931.7  |       |
| TO0273000 | PA TABULEIRO                  | 0.0    | 0.0      | 42.7   | 3301.8   |        |          | 502.2  | 38792.3  | 502.2   | 38792.3  | 42094.1  |       |
| TO0274000 | PA BELA VISTA                 | 0.0    | 0.0      | 447.0  | 63348.4  |        |          | 861.7  | 122453.9 | 861.7   | 122453.9 | 185802.3 |       |
| TO0275000 | PA PACIÊNCIA                  | 0.0    | 0.0      | 224.1  | 6583.0   |        |          | 2310.3 | 69569.2  | 2310.3  | 69569.2  | 76152.2  | 1.4   |
| TO0276000 | PA CACHOEIRINHA               | 654.3  | 62244.9  | 0.0    | 0.0      | 4.2    | 539.2    | 3.5    | 33.0     | 7.7     | 572.2    | 62817.2  |       |
| TO0277000 | PA SENHOR DO BONFIM           | 0.0    | 0.0      | 75.6   | 712.4    | 39.3   | 5114.5   | 1560.3 | 29562.5  | 1599.6  | 34677.0  | 35389.3  |       |
| TO0278000 | PA PONTÃO                     | 298.5  | 55789.7  | 0.0    | 0.0      |        |          |        |          | 0.0     | 0.0      | 55789.7  |       |
| TO0279000 | PA BASTI—O VELHO              | 24.0   | 4481.2   | 0.0    | 0.0      |        |          | 406.6  | 75976.4  | 406.6   | 75976.4  | 80457.6  |       |
| TO0280000 | PA REMANSINHO                 | 0.0    | 0.0      | 1376.5 | 26758.3  |        |          | 1538.9 | 311921.5 | 15389.4 | 311921.5 | 338679.8 | 81.8  |
| TO0281000 | PA ARLINDO                    | 0.0    | 0.0      | 1615.6 | 53299.5  |        |          | 1116.3 | 36827.9  | 1116.3  | 36827.9  | 90127.4  |       |
| TO0282000 | PA REMANSÃO                   | 0.0    | 0.0      | 201.5  | 6648.5   |        |          | 3049.9 | 100616.7 | 3049.9  | 100616.7 | 107265.2 |       |
| TO0284000 | PA SÃO GABRIEL                | 3449.0 | 566403.1 | 0.0    | 0.0      | 1031.9 | 168663.0 |        |          | 1031.9  | 168663.0 | 735066.2 |       |
| TO0286000 | PA BREJÃO                     | 0.0    | 0.0      | 4.8    | 158.5    |        |          | 652.6  | 43431.5  | 652.6   | 43431.5  | 43589.9  |       |
| TO0287000 | PA VALE DA SERRA DA CONCEIÇÃO | 161.6  | 25718.1  | 16.0   | 2613.7   | 20.5   | 3219.6   | 1515.9 | 246782.0 | 1536.3  | 250001.5 | 278333.4 |       |
| TO0288000 | PA TAPIRASSU                  | 0.0    | 0.0      | 735.5  | 24765.2  |        |          | 991.5  | 38673.3  | 991.5   | 38673.3  | 63438.4  |       |
| TO0289000 | PA PIABA                      | 0.0    | 0.0      | 493.8  | 16290.2  |        |          | 791.5  | 26112.5  | 791.5   | 26112.5  | 42402.7  |       |
| TO0290000 | PA SERTÃOZINHO                | 0.0    | 0.0      | 463.9  | 15303.9  |        |          | 651.0  | 21477.0  | 651.0   | 21477.0  | 36780.9  |       |
| TO0291000 | PA DESTILARIA                 | 0.0    | 0.0      | 1219.4 | 185153.5 |        |          | 684.4  | 96672.2  | 684.4   | 96672.2  | 281825.7 |       |
| TO0292000 | PA JURANDI BELIZÁRIO          | 0.0    | 0.0      | 0.0    | 0.0      |        |          | 2089.8 | 366162.1 | 2089.8  | 366162.1 | 366162.1 | 104.0 |
| TO0293000 | PA SÃO BENTO                  | 173.6  | 27507.6  | 377.3  | 60401.6  | 27.7   | 4231.9   | 2213.2 | 360293.8 | 2240.9  | 364525.7 | 452434.8 |       |
| TO0294000 | PA VOLTA DO RIO               | 0.0    | 0.0      | 1762.6 | 59866.7  |        |          | 4101.1 | 140811.9 | 4101.1  | 140811.9 | 200678.6 | 1.9   |

|           |                              |        |          |        |         |       |          |        |          |        |          |          |      |
|-----------|------------------------------|--------|----------|--------|---------|-------|----------|--------|----------|--------|----------|----------|------|
| TO0295000 | PA DUAS CABECEIRAS           | 0.0    | 0.0      | 252.0  | 19464.7 |       |          | 965.7  | 74590.6  | 965.7  | 74590.6  | 94055.3  |      |
| TO0296000 | PA TURRÃO                    | 0.0    | 0.0      | 489.5  | 37812.2 |       |          | 188.4  | 14548.9  | 188.4  | 14548.9  | 52361.1  |      |
| TO0297000 | PA TUCUMIRIM                 | 2954.1 | 400203.2 | 0.0    | 0.0     | 479.3 | 40426.6  | 792.9  | 117128.6 | 1272.3 | 157555.2 | 557758.5 |      |
| TO0298000 | PA ARRAIAS                   | 1232.5 | 190556.4 | 0.0    | 0.0     | 154.4 | 24713.4  |        |          | 154.4  | 24713.4  | 215269.8 |      |
| TO0299000 | PA CHAPADA VERMELHA          | 0.0    | 0.0      | 456.1  | 16277.6 |       |          | 2014.0 |          |        |          |          |      |
| TO0300000 | PA PAULO FREIRE I e II       | 0.0    | 0.0      | 1308.0 | 41746.4 | 2.3   | 73.8     | 3327.0 |          | 2014.0 | 80171.6  | 96449.2  |      |
| TO0301000 | PA OZIEL ALVES PEREIRA       | 1362.5 | 198218.0 | 2.7    | 424.9   | 309.7 | 46391.1  | 90.1   | 13942.9  | 399.8  | 60334.1  | 258976.9 |      |
| TO0302000 | PA ESTRELA                   | 603.4  | 98338.1  | 52.9   | 8625.1  | 559.9 | 91240.5  | 159.6  | 26009.5  | 719.5  | 117250.0 | 224213.2 |      |
| TO0303000 | PA VARGEM GRANDE             | 1924.9 | 63503.6  | 147.8  | 4875.3  | 110.1 | 3632.7   | 61.4   | 2026.7   | 171.6  | 5659.5   | 74038.4  |      |
| TO0304000 | PA ZÉ PEREIRA                | 0.0    | 0.0      | 894.5  | 28490.5 |       |          | 1352.4 | 41080.5  | 1352.4 | 41080.5  | 69571.0  | 0.7  |
| TO0305000 | PA COBERTÃO                  | 0.0    | 0.0      | 1179.5 | 38911.1 |       |          | 1596.8 | 52677.7  | 1596.8 | 52677.7  | 91588.8  |      |
| TO0306000 | PA VITÓRIA I                 | 0.0    | 0.0      | 756.5  | 24957.6 |       |          | 1258.2 | 42291.9  | 1258.2 | 42291.9  | 67249.5  |      |
| TO0307000 | PA VALE VERDE                | 0.0    | 0.0      | 851.6  | 86250.0 |       |          | 902.9  | 73418.9  | 902.9  | 73418.9  | 159669.0 |      |
| TO0308000 | PA 2 DE JANEIRO              | 0.0    | 0.0      | 535.5  | 87266.7 |       |          | 1400.8 | 228179.3 | 1400.8 | 228179.3 | 315446.0 |      |
| TO0309000 | PA ALTO ALEGRE               | 185.9  | 23999.8  | 78.0   | 891.6   | 448.7 | 61350.5  | 1251.7 | 37520.7  | 1700.3 | 98871.2  | 123762.6 | 14.8 |
| TO0310000 | PA BURITIRANA                | 698.9  | 102521.7 | 81.5   | 11862.6 | 999.3 | 144726.9 | 6.9    | 950.8    | 1006.2 | 145677.7 | 260062.0 | 1.1  |
| TO0312000 | PA SANTO ANTONIO BOM SOSSEGO | 0.0    | 0.0      | 37.3   | 1035.6  |       |          | 1399.6 | 43892.8  | 1399.6 | 43892.8  | 44928.4  |      |
| TO0313000 | PA SÃO JOSÉ BELA VISTA       | 0.0    | 0.0      | 7.1    | 129.4   |       |          | 1752.6 | 53788.1  | 1752.6 | 53788.1  | 53917.5  |      |
| TO0314000 | PA BARRA DO RIO ARRAIAS      | 0.0    | 0.0      | 249.8  | 19296.0 |       |          | 326.3  | 25207.2  | 326.3  | 25207.2  | 44503.3  |      |
| TO0315000 | PA SANTA CLARA II            | 0.0    | 0.0      | 13.4   | 440.4   |       |          | 441.8  | 17622.5  | 441.8  | 17622.5  | 18063.0  |      |
| TO0316000 | PA POÇO AZUL                 | 0.0    | 0.0      | 1183.1 | 39032.1 |       |          | 421.5  | 13906.9  | 421.5  | 13906.9  | 52939.0  |      |
| TO0317000 | PA FORTALEZA                 | 334.4  | 54500.1  | 0.0    | 0.0     |       |          |        |          | 0.0    | 0.0      | 54500.1  |      |
| TO0319000 | PA ALEGRIA II                | 0.0    | 0.0      | 71.3   | 1527.8  |       |          | 1833.1 | 35022.4  | 1833.1 | 35022.4  | 36550.3  |      |
| TO0320000 | PA PIEDADE                   | 0.0    | 0.0      | 420.1  | 13393.8 |       |          | 848.5  | 39485.4  | 848.5  | 39485.4  | 52879.2  |      |
| TO0321000 | PA TAUARI                    | 0.0    | 0.0      | 883.0  | 29255.6 |       |          | 2528.7 | 83571.9  | 2528.7 | 83571.9  | 112827.5 |      |
| TO0322000 | PA IPÊ AMARELO               | 13.0   | 2114.8   | 255.7  | 41679.6 | 0.1   | 16.0     | 1092.1 | 177972.7 | 1092.2 | 177988.7 | 221783.1 |      |
| TO0323000 | PA COCAL II                  | 0.0    | 0.0      | 722.2  | 6803.5  |       |          | 1343.0 | 12651.5  | 1343.0 | 12651.5  | 19455.0  |      |

|           |                               |        |          |        |          |        |          |                |          |        |          |           |       |
|-----------|-------------------------------|--------|----------|--------|----------|--------|----------|----------------|----------|--------|----------|-----------|-------|
| TO0324000 | PA SOLIDÁRIO                  | 1264.6 | 205948.5 | 8.2    | 1331.1   | 22.1   | 3597.3   |                |          | 22.1   | 3597.3   | 210876.9  |       |
| TO0325000 | PA SANTA RITA                 | 0.0    | 0.0      | 431.2  | 14223.8  |        |          | 514.2          | 16439.0  | 514.2  | 16439.0  | 30662.7   |       |
| TO0326000 | PA PADRE JOSIMO I<br>E II     | 0.0    | 0.0      | 1884.2 | 62160.6  |        |          | 6262.<br>0     | 205770.6 | 6262.0 | 205770.6 | 267931.1  |       |
| TO0327000 | PA MARÍLIA                    | 2612.3 | 259712.2 | 0.0    | 0.0      | 76.2   | 6538.8   | 156.9          | 3866.4   | 233.1  | 10405.2  | 270117.4  |       |
| TO0328000 | PA ORLÂNDIA                   | 726.8  | 81116.8  | 0.0    | 0.0      | 32.0   | 2614.8   |                |          | 32.0   | 2614.8   | 83731.6   |       |
| TO0329000 | PA UNIVERSO                   | 0.0    | 0.0      | 181.3  | 5981.5   |        |          | 1022.<br>5     | 33730.8  | 1022.5 | 33730.8  | 39712.3   |       |
| TO0330000 | PA 20 MIL                     | 984.6  | 160444.0 | 0.0    | 0.0      |        |          |                |          | 0.0    | 0.0      | 160444.0  |       |
| TO0332000 | PA BARRA MANSA                | 375.3  | 24726.8  | 334.8  | 3262.3   | 815.5  | 60758.5  | 4863.<br>0     | 69231.9  | 5678.5 | 129990.4 | 157979.5  |       |
| TO0333000 | PA SÃO JOSÉ I                 | 0.0    | 0.0      | 1929.0 | 68654.4  |        |          | 6447.<br>0     | 306985.0 | 6447.0 | 306985.0 | 375639.4  | 6.6   |
| TO0334000 | PA PIRARUCU I                 | 0.0    | 0.0      | 747.3  | 24652.7  |        |          | 1160.<br>7     | 38290.9  | 1160.7 | 38290.9  | 62943.6   |       |
| TO0335000 | PA I    DE MAIO               | 636.4  | 69058.5  | 660.1  | 28900.7  | 1995.4 | 288683.8 | 876.2          | 43770.0  | 2871.6 | 332453.8 | 430412.9  | 135.3 |
| TO0336000 | PA PADRE EXPEDITO             | 508.7  | 21959.2  | 175.1  | 5867.4   | 286.1  | 9570.6   | 290.6          | 9587.1   | 576.7  | 19157.6  | 46984.2   |       |
| TO0337000 | PA CHE GUEVARA                | 15.6   | 512.0    | 605.8  | 16607.9  |        |          | 775.5          | 24638.7  | 775.5  | 24638.7  | 41758.7   |       |
| TO0338000 | PA BACURI                     | 548.4  | 80742.3  | 41.9   | 6269.9   | 773.6  | 115884.5 |                |          | 773.6  | 115884.5 | 202896.7  |       |
| TO0339000 | PA MORRO DAS<br>NEVES         | 0.0    | 0.0      | 205.0  | 7338.4   |        |          | 645.1          | 27179.0  | 645.1  | 27179.0  | 34517.4   |       |
| TO0352000 | PA RENASCER                   | 0.0    | 0.0      | 1539.4 | 50786.3  |        |          | 646.0          | 21310.4  | 646.0  | 21310.4  | 72096.6   |       |
| TO0353000 | PA CHAVE DE OURO              | 366.8  | 59776.6  | 28.2   | 4597.5   | 44.1   | 7194.3   |                |          | 44.1   | 7194.3   | 71568.3   |       |
| TO0354000 | PA SANTA JULIA                | 0.0    | 0.0      | 392.4  | 15738.5  |        |          | 1397.<br>3     | 65888.1  | 1397.3 | 65888.1  | 81626.6   |       |
| TO0355000 | PA GROTA DE<br>PEDRA          | 18.5   | 2536.4   | 517.1  | 15995.9  | 114.5  | 15648.2  | 1655.<br>9     | 59752.2  | 1770.4 | 75400.4  | 93932.7   |       |
| TO0358000 | PA MATÃO                      | 0.0    | 0.0      | 166.0  | 5476.5   |        |          | 1120.<br>6     | 36969.1  | 1120.6 | 36969.1  | 42445.6   |       |
| TO0359000 | PA CAMPO DA<br>MISSA          | 355.2  | 27443.0  | 101.7  | 7854.1   | 138.0  | 10658.1  | 597.2<br>6707. | 46125.4  | 735.1  | 56783.5  | 92080.6   | 1.8   |
| TO0370000 | PA ARAGUAIA I                 | 5922.4 | 797767.7 | 9894.0 | 523050.4 | 1659.8 | 235891.9 | 0<br>2603.     | 267503.3 | 8366.8 | 503395.2 | 1824213.3 |       |
| TO0371000 | PA SANTA RITA II              | 0.0    | 0.0      | 626.4  | 5900.6   |        |          | 0<br>2966.     | 24519.9  | 2603.0 | 24519.9  | 30420.5   |       |
| TO0372000 | PA LAGO DA<br>UMBAÚBA         | 5.4    | 944.0    | 0.0    | 0.0      |        |          | 3<br>5300.     | 526422.4 | 2966.3 | 526422.4 | 527366.5  | 84.7  |
| TO0373000 | PA PRINCIPADO DO<br>CARMO     | 0.0    | 0.0      | 653.8  | 31271.3  |        |          | 4              | 406411.1 | 5300.4 | 406411.1 | 437682.4  |       |
| TO0374000 | PA TABOCA                     | 0.0    | 0.0      | 318.4  | 11737.3  |        |          | 382.3          | 25159.6  | 382.3  | 25159.6  | 36896.9   |       |
| TO0375000 | PA NOSSA SENHORA<br>DE FÁTIMA | 0.0    | 0.0      | 134.9  | 4450.7   |        |          | 868.5          | 28650.7  | 868.5  | 28650.7  | 33101.4   |       |



|           |                               |        |          |        |         |       |          |        |          |        |          |           |
|-----------|-------------------------------|--------|----------|--------|---------|-------|----------|--------|----------|--------|----------|-----------|
| TO0410000 | PA TERRA VERMELHA             | 0.0    | 0.0      | 275.9  | 12266.8 |       |          | 1898.2 | 144672.7 | 1898.2 | 144672.7 | 156939.5  |
| TO0411000 | PA SÃO BENTO I                | 0.0    | 0.0      | 398.1  | 21142.8 |       |          | 1895.6 | 136152.0 | 1895.6 | 136152.0 | 157294.7  |
| TO0412000 | PA PINDORAMA I                | 0.0    | 0.0      | 95.6   | 7325.9  |       |          | 2159.8 | 165273.0 | 2159.8 | 165273.0 | 172598.9  |
| TO0413000 | PA PALMARES                   | 1913.8 | 316472.6 | 0.0    | 0.0     |       |          | 0.0    |          | 0.0    | 0.0      | 316472.6  |
| TO0414000 | PA VALE DO BARREIRAS          | 222.7  | 2097.9   | 22.7   | 213.8   | 4.0   | 239.0    | 1032.8 | 9729.3   | 1036.9 | 9968.3   | 12280.1   |
| TO0415000 | PA MÁRTIRES DA TERRA          | 1925.3 | 313758.9 | 81.2   | 13233.1 | 884.2 | 144105.4 |        |          | 884.2  | 144105.4 | 471097.5  |
| TO0416000 | PA MATIÉS                     | 0.0    | 0.0      | 54.9   | 2615.0  |       |          | 648.4  | 45297.3  | 648.4  | 45297.3  | 47912.3   |
| TO0417000 | PA VEREDÃO                    | 0.0    | 0.0      | 372.0  | 12302.7 |       |          | 1286.2 | 47096.1  | 1286.2 | 47096.1  | 59398.9   |
| TO0418000 | PA MATA AZUL I                | 4213.7 | 675354.3 | 0.0    | 0.0     | 47.1  | 7681.4   |        |          | 47.1   | 7681.4   | 683035.7  |
| TO0419000 | PA NOSSA SENHORA DA CONCEIÇÃO | 0.0    | 0.0      | 287.4  | 9479.8  |       |          | 898.2  | 29630.1  | 898.2  | 29630.1  | 39109.9   |
| TO0420000 | PA CARAJÁS                    | 0.0    | 0.0      | 217.6  | 7180.0  |       |          | 968.9  | 31964.8  | 968.9  | 31964.8  | 39144.8   |
| TO0421000 | PA PRATINHA                   | 0.0    | 0.0      | 0.0    | 0.0     |       |          | 227.5  | 7505.5   | 227.5  | 7505.5   | 7505.5    |
| TO0423000 | PA PONTAL DAS ESTRELAS        | 0.0    | 0.0      | 28.7   | 972.1   | 0.0   | 1.8      | 1750.5 | 63982.4  | 1750.5 | 63984.2  | 64956.3   |
| TO0424000 | PA PONTAL DAS ESTRELAS I      | 0.0    | 0.0      | 725.3  | 23927.4 |       |          | 650.2  | 21448.9  | 650.2  | 21448.9  | 45376.3   |
| TO0425000 | PA CORUJA                     | 30.8   | 5012.4   | 0.0    | 0.0     |       |          | 602.8  | 59265.0  | 602.8  | 59265.0  | 64277.4   |
| TO0426000 | PA NOVA VIDA I                | 0.0    | 0.0      | 159.2  | 4900.8  |       |          | 344.5  | 9850.1   | 344.5  | 9850.1   | 14751.0   |
| TO0427000 | PA MANGUEIRA                  | 0.0    | 0.0      | 145.4  | 4796.8  |       |          | 3199.7 | 105557.4 | 3199.7 | 105557.4 | 110354.2  |
| TO0429000 | PA MAJU                       | 836.1  | 136266.3 | 66.4   | 10820.8 | 61.2  | 9979.0   | 143.1  | 23324.8  | 204.4  | 33303.7  | 180390.9  |
| TO0430000 | PA NOVA UNIÃO                 | 2540.7 | 472653.9 | 0.0    | 0.0     | 377.5 | 70479.4  |        |          | 377.5  | 70479.4  | 543133.4  |
| TO0431000 | PA DA MATA                    | 0.0    | 0.0      | 1212.2 | 39991.0 | 264.3 | 20025.4  | 3059.1 | 78448.3  | 3323.4 | 98473.6  | 138464.6  |
| TO0432000 | PA SITIO PA BREJO DO CAMPO    | 0.0    | 0.0      | 17.9   | 581.5   |       |          | 2614.1 | 93547.7  | 2614.1 | 93547.7  | 94129.3   |
| TO0433000 | PA PONTAL DAS ESTRELAS V      | 0.0    | 0.0      | 8.0    | 168.9   |       |          | 1128.9 | 32396.9  | 1128.9 | 32396.9  | 32565.8   |
| TO0434000 | PA CANOA DE ASSIS             | 5643.8 | 919765.0 | 0.0    | 0.0     | 953.2 | 155343.6 |        |          | 953.2  | 155343.6 | 1075108.6 |
| TO0435000 | PA SÃO FRANCISCO DE ASSIS     | 0.0    | 0.0      | 340.9  | 11247.5 |       |          | 2197.3 | 72490.4  | 2197.3 | 72490.4  | 83737.9   |
| TO0436000 | PA VIRGÍNIA                   | 0.0    | 0.0      | 759.4  | 25053.1 |       |          | 952.1  | 31410.4  | 952.1  | 31410.4  | 56463.5   |
| TO0437000 | PA VITÓRIA III                | 0.0    | 0.0      | 0.0    | 0.0     |       |          | 1307.1 | 29683.4  | 1307.1 | 29683.4  | 29683.4   |

|           |                       |          |            |          |           |         |           |        |            |       |          |          |            |            |        |
|-----------|-----------------------|----------|------------|----------|-----------|---------|-----------|--------|------------|-------|----------|----------|------------|------------|--------|
| TO0439000 | PA BARONESA I         | 0.0      | 0.0        | 184.9    | 6091.6    |         |           | 3144.9 | 103638.4   |       | 3144.9   | 103638.4 | 109730.0   |            |        |
| TO0440000 | PA PEQUIZEIRO         | 0.0      | 0.0        | 24.9     | 234.5     |         |           | 977.9  | 9211.4     |       | 977.9    | 9211.4   | 9445.8     |            |        |
| TO0441000 | PA MUTAMBA            | 1021.3   | 170620.0   | 0.0      | 0.0       |         |           |        |            |       | 0.0      | 0.0      | 170620.0   | 12.5       |        |
| TO0442000 | PA 25 DE MARÇO        | 0.0      | 0.0        | 705.7    | 23280.4   |         |           | 838.8  | 27672.6    |       | 838.8    | 27672.6  | 50953.0    |            |        |
| TO0443000 | PA TERRA<br>PROMETIDA | 0.0      | 0.0        | 560.1    | 19877.2   |         |           | 930.9  | 51513.2    |       | 930.9    | 51513.2  | 71390.4    | 0.4        |        |
| TO0444000 | PA SANTA MARIA I      | 235.2    | 35316.4    | 5.6      | 836.5     | 105.7   | 15834.8   |        |            |       | 105.7    | 15834.8  | 51987.7    |            |        |
| TO0445000 | PA FORTALEZA I        | 0.0      | 0.0        | 1156.2   | 38142.9   |         |           | 2338.5 | 77148.4    |       | 2338.5   | 77148.4  | 115291.3   | 214.6      |        |
| TO0446000 | PA SANTA TEREZA II    | 0.0      | 0.0        | 1217.2   | 41162.8   |         |           | 2147.5 | 92363.3    |       | 2147.5   | 92363.3  | 133526.1   |            |        |
| TO0447000 | PA SANTA LUZIA I      | 685.5    | 102692.4   | 10.8     | 1615.9    | 134.9   | 20216.8   | 260.2  | 38974.3    |       | 395.1    | 59191.1  | 163499.3   |            |        |
| TO0448000 | PA LUAR DO<br>SERTAO  | 1342.7   | 222040.2   | 9.6      | 1592.7    | 580.9   | 97216.5   | 7.3    | 1211.8     |       | 588.1    | 98428.3  | 322061.2   |            |        |
| TO0449000 | PA PROVÍNCIA          | 2894.9   | 413136.9   | 0.0      | 0.0       | 709.3   | 115294.4  |        |            |       | 709.3    | 115294.4 | 528431.3   |            |        |
| TO0451000 | PA MANOEL ALVES       | 2870.6   | 262162.2   | 249.0    | 19231.4   | 7.9     | 1169.5    |        |            |       | 7.9      | 1169.5   | 282563.0   |            |        |
| TO0452000 | PA VALE DO<br>PARAISO | 480.6    | 74806.8    | 111.8    | 15011.3   | 221.2   | 35047.7   | 304.5  | 28600.1    |       | 525.7    | 63647.8  | 153465.9   |            |        |
| TO0453000 | PA BARRA DO<br>LONTRA | 868.8    | 129680.7   | 0.0      | 0.0       | 505.7   | 58560.6   |        |            |       | 505.7    | 58560.6  | 188241.3   |            |        |
|           |                       |          |            | 234610.5 |           |         |           | 4960.8 | 26716601.8 |       | 561148.7 |          |            |            |        |
|           | Total in Tocantins    | 344534.1 | 52030079.9 | 5        | 9969701.4 | 64946.7 | 9092853.1 | 45.8   |            | 156.2 | 18963.6  | 7        | 35828418.5 | 97828199.7 | 2565.5 |

**Table S6** Estimates of area of forest and of clearing (km<sup>2</sup> and %) through the year of official creation of each settlement and in the period after creation (from one year after creation to 2005 and from 2006 or one year after creation to 2013) in 950 settlements created between 2000 and 2008

| Year of creation | Settlement project code | Settlement project             | Total area of forest (km <sup>2</sup> ) | Total area cleared through the year of creation (km <sup>2</sup> ) |      | Remaining forest in the year of settlement creation |      | From one year after creation to 2005 |      |                 | Remaining forest in 2005 |                 | From 2006 to 2013 or from one year after creation to 2013 |                 |                    | Remaining forest in 2013 |                      |                 |   |
|------------------|-------------------------|--------------------------------|-----------------------------------------|--------------------------------------------------------------------|------|-----------------------------------------------------|------|--------------------------------------|------|-----------------|--------------------------|-----------------|-----------------------------------------------------------|-----------------|--------------------|--------------------------|----------------------|-----------------|---|
|                  |                         |                                |                                         | km <sup>2</sup>                                                    | %    | km <sup>2</sup>                                     | %    | km <sup>2</sup>                      | %    | km <sup>2</sup> | %                        | %               | km <sup>2</sup>                                           | %               | Total area cleared |                          | Annual mean clearing | km <sup>2</sup> | % |
|                  |                         |                                |                                         |                                                                    |      |                                                     |      |                                      |      |                 |                          |                 |                                                           |                 | km <sup>2</sup>    | %                        |                      |                 |   |
|                  |                         |                                |                                         | km <sup>2</sup>                                                    | %    | km <sup>2</sup>                                     | %    | km <sup>2</sup>                      | %    | km <sup>2</sup> | %                        | km <sup>2</sup> | %                                                         | km <sup>2</sup> | %                  | km <sup>2</sup>          | %                    | km <sup>2</sup> | % |
| 2000             | AM0039000               | PDS MORENA                     | 484.40                                  | 0.68                                                               | 0%   | 483.71                                              | 100% | 1.65                                 | 0%   | 0%              | 482.06                   | 100%            | 0.84                                                      | 0%              | 0%                 | 481.22                   | 99%                  |                 |   |
| 2000             | AM0040000               | PA ENGENHO                     | 22.62                                   | 0.24                                                               | 1%   | 22.38                                               | 99%  | 1.17                                 | 5%   | 1%              | 21.22                    | 94%             | 2.77                                                      | 13%             | 2%                 | 18.44                    | 82%                  |                 |   |
| 2000             | AM0041000               | PA CAVIANA                     | 52.32                                   | 3.93                                                               | 8%   | 48.40                                               | 92%  | 2.16                                 | 4%   | 1%              | 46.23                    | 88%             | 2.22                                                      | 5%              | 1%                 | 44.01                    | 84%                  |                 |   |
| 2000             | AP0028000               | PA PEDRA BRANCA                | 294.44                                  | 13.65                                                              | 5%   | 280.79                                              | 95%  | 16.56                                | 6%   | 1%              | 264.23                   | 90%             | 4.19                                                      | 2%              | 0%                 | 260.04                   | 88%                  |                 |   |
| 2000             | AP0029000               | PA CORRE ÁGUA                  | 58.18                                   | 13.10                                                              | 23%  | 45.08                                               | 77%  | 3.43                                 | 8%   | 2%              | 41.64                    | 72%             | 3.85                                                      | 9%              | 1%                 | 37.80                    | 65%                  |                 |   |
| 2000             | MA0502000               | PA CHICO MENDES/<br>BANANEIRAS | 56.24                                   | 26.04                                                              | 46%  | 30.20                                               | 54%  | 12.73                                | 42%  | 8%              | 17.47                    | 31%             | 9.02                                                      | 52%             | 6%                 | 8.45                     | 15%                  |                 |   |
| 2000             | MA0508000               | PA CASA BRANCA                 | 20.47                                   | 1.13                                                               | 6%   | 19.34                                               | 94%  | 7.40                                 | 38%  | 8%              | 11.94                    | 58%             | 3.11                                                      | 26%             | 3%                 | 8.83                     | 43%                  |                 |   |
| 2000             | MA0510000               | PA VENEZA                      | 3.81                                    | 1.41                                                               | 37%  | 2.39                                                | 63%  | 1.27                                 | 53%  | 11%             | 1.12                     | 29%             | 0.07                                                      | 6%              | 1%                 | 1.05                     | 28%                  |                 |   |
| 2000             | MA0511000               | PA SANTA ISABEL                | 26.42                                   | 7.02                                                               | 27%  | 19.40                                               | 73%  | 9.16                                 | 47%  | 9%              | 10.24                    | 39%             | 5.47                                                      | 53%             | 7%                 | 4.77                     | 18%                  |                 |   |
| 2000             | MA0521000               | PA TINGIDOR                    | 50.51                                   | 0.00                                                               | 0%   | 50.51                                               | 100% | 0.54                                 | 1%   | 0%              | 49.98                    | 99%             | 6.04                                                      | 12%             | 2%                 | 43.94                    | 87%                  |                 |   |
| 2000             | MA0523000               | PA LAGO DA<br>CARNAÚBA         | 92.50                                   | 92.50                                                              | 100% | 0.00                                                | 0%   | 0.00                                 |      |                 | 0.00                     | 0%              | 0.00                                                      |                 | 0%                 | 0.00                     | 0%                   |                 |   |
| 2000             | MA0526000               | PA ROSELI<br>NUNES/BANANEIRAS  | 63.09                                   | 17.79                                                              | 28%  | 45.30                                               | 72%  | 14.59                                | 32%  | 6%              | 30.72                    | 49%             | 11.22                                                     | 37%             | 5%                 | 19.50                    | 31%                  |                 |   |
| 2000             | MA0538000               | PE VERA CRUZ I                 | 104.35                                  | 23.16                                                              | 22%  | 81.20                                               | 78%  | 18.75                                | 23%  | 5%              | 62.45                    | 60%             | 7.54                                                      | 12%             | 2%                 | 54.91                    | 53%                  |                 |   |
| 2000             | MA0540000               | PA CIPOAL                      | 241.13                                  | 0.00                                                               | 0%   | 241.13                                              | 100% | 194.64                               | 81%  | 16%             | 46.49                    | 19%             | 7.13                                                      | 15%             | 2%                 | 39.36                    | 16%                  |                 |   |
| 2000             | MA0541000               | PA JAGUARIBE                   | 19.39                                   | 0.00                                                               | 0%   | 19.39                                               | 100% | 19.39                                | 100% | 20%             | 0.00                     | 0%              | 0.00                                                      |                 | 0%                 | 0.00                     | 0%                   |                 |   |



|      |           |                                     |        |            |     |        |      |       |     |     |        |     |       |     |    |       |     |
|------|-----------|-------------------------------------|--------|------------|-----|--------|------|-------|-----|-----|--------|-----|-------|-----|----|-------|-----|
| 2000 | MA0542000 | PE MANAUS                           | 31.38  | 22.42      | 71% | 8.97   | 29%  | 4.95  | 55% | 11% | 4.02   | 13% | 1.39  | 35% | 4% | 2.63  | 8%  |
| 2000 | MB0268000 | PA CHICO MENDES I                   | 21.39  | 4.91       | 23% | 16.49  | 77%  | 0.87  | 5%  | 1%  | 15.62  | 73% | 2.92  | 19% | 2% | 12.69 | 59% |
| 2000 | MB0276000 | PA SANTA EUDOXIA                    | 30.14  | 25.19      | 84% | 4.95   | 16%  | 3.66  | 74% | 15% | 1.29   | 4%  | 0.56  | 43% | 5% | 0.73  | 2%  |
| 2000 | MB0278000 | PA MARINGÁ                          | 41.62  | 20.94      | 50% | 20.68  | 50%  | 13.35 | 65% | 13% | 7.33   | 18% | 3.45  | 47% | 6% | 3.88  | 9%  |
| 2000 | MB0284000 | PA RANCHARIA                        | 31.27  | 8.64       | 28% | 22.63  | 72%  | 3.09  | 14% | 3%  | 19.54  | 63% | 5.66  | 29% | 4% | 13.88 | 44% |
| 2000 | MB0286000 | PA VISTA ALEGRE                     | 20.99  | 2.95       | 14% | 18.04  | 86%  | 7.95  | 44% | 9%  | 10.09  | 48% | 4.10  | 41% | 5% | 5.99  | 29% |
| 2000 | MB0287000 | PA ACAPU                            | 10.21  | 3.71       | 36% | 6.50   | 64%  | 5.84  | 90% | 18% | 0.66   | 6%  | 0.14  | 22% | 3% | 0.52  | 5%  |
| 2000 | MB0288000 | PA VALE DA SERRA                    | 21.60  | 18.38      | 85% | 3.22   | 15%  | 1.88  | 58% | 12% | 1.34   | 6%  | 0.25  | 19% | 2% | 1.09  | 5%  |
| 2000 | MB0289000 | PA UNIAO DA<br>VITORIA              | 41.60  | 34.11      | 82% | 7.50   | 18%  | 3.56  | 47% | 9%  | 3.94   | 9%  | 0.41  | 11% | 1% | 3.53  | 8%  |
| 2000 | MB0290000 | PA JERONIMO NUNES<br>LACERDA        | 37.57  | 33.74      | 90% | 3.84   | 10%  | 2.39  | 62% | 12% | 1.45   | 4%  | 0.39  | 27% | 3% | 1.06  | 3%  |
| 2000 | MB0291000 | PA MARIA DE<br>LOURDES<br>RODRIGUES | 41.85  | 40.68      | 97% | 1.17   | 3%   | 0.78  | 67% | 13% | 0.39   | 1%  | 0.09  | 23% | 3% | 0.30  | 1%  |
| 2000 | MB0293000 | PA RIO PARA                         | 54.24  | 2.05       | 4%  | 52.19  | 96%  | 15.81 | 30% | 6%  | 36.37  | 67% | 14.68 | 40% | 5% | 21.69 | 40% |
| 2000 | MB0294000 | PA RIO CINZA                        | 56.16  | 10.84      | 19% | 45.32  | 81%  | 15.21 | 34% | 7%  | 30.11  | 54% | 17.08 | 57% | 7% | 13.02 | 23% |
| 2000 | MB0295000 | PA RIO NEGRO                        | 43.89  | 4.04       | 9%  | 39.85  | 91%  | 13.92 | 35% | 7%  | 25.93  | 59% | 12.00 | 46% | 6% | 13.93 | 32% |
| 2000 | MB0296000 | PA ARAPARI                          | 142.25 | 17.75      | 12% | 124.50 | 88%  | 32.32 | 26% | 5%  | 92.18  | 65% | 44.02 | 48% | 6% | 48.16 | 34% |
| 2000 | MB0297000 | PA EMÍDIO BATISTA<br>DE MOURA       | 117.36 | 111.5<br>6 | 95% | 5.80   | 5%   | 2.91  | 50% | 10% | 2.89   | 2%  | 0.19  | 7%  | 1% | 2.69  | 2%  |
| 2000 | MB0298000 | PA 21 DE ABRIL                      | 17.75  | 13.06      | 74% | 4.69   | 26%  | 3.88  | 83% | 17% | 0.81   | 5%  | 0.11  | 14% | 2% | 0.70  | 4%  |
| 2000 | MB0299000 | PA VALENTIM SERRA                   | 22.88  | 14.91      | 65% | 7.97   | 35%  | 1.65  | 21% | 4%  | 6.32   | 28% | 3.31  | 52% | 7% | 3.01  | 13% |
| 2000 | MT0240000 | PA SANTA CLARA                      | 183.72 | 35.87      | 20% | 147.85 | 80%  | 38.63 | 26% | 5%  | 109.22 | 59% | 22.35 | 20% | 3% | 86.88 | 47% |
| 2000 | MT0253000 | PA ESCONDIDO                        | 44.70  | 0.00       | 0%  | 44.70  | 100% | 2.53  | 6%  | 1%  | 42.17  | 94% | 13.32 | 32% | 4% | 28.84 | 65% |
| 2000 | MT0275000 | PA SÃO SATURNINO                    | 28.92  | 7.84       | 27% | 21.08  | 73%  | 18.33 | 87% | 17% | 2.76   | 10% | 1.26  | 46% | 6% | 1.50  | 5%  |
| 2000 | MT0295000 | PA UNIÃO FLOR DA                    | 8.21   | 7.98       | 97% | 0.23   | 3%   | 0.14  | 62% | 12% | 0.09   | 1%  | 0.00  | 0%  | 0% | 0.09  | 1%  |

| SERRA |           |                         |        |        |     |        |      |        |     |     |        |      |       |     |    |        |      |
|-------|-----------|-------------------------|--------|--------|-----|--------|------|--------|-----|-----|--------|------|-------|-----|----|--------|------|
| 2000  | MT0329000 | PA LAGOA RICA           | 20.98  | 11.90  | 57% | 9.08   | 43%  | 3.92   | 43% | 9%  | 5.16   | 25%  | 1.05  | 20% | 3% | 4.11   | 20%  |
| 2000  | MT0346000 | PA MONTE VERDE          | 31.05  | 12.90  | 42% | 18.14  | 58%  | 11.02  | 61% | 12% | 7.12   | 23%  | 2.99  | 42% | 5% | 4.13   | 13%  |
| 2000  | MT0349000 | PA SÃO VICENTE          | 233.90 | 79.48  | 34% | 154.42 | 66%  | 75.73  | 49% | 10% | 78.69  | 34%  | 32.27 | 41% | 5% | 46.42  | 20%  |
| 2000  | MT0356000 | PA CACHIMBO II          | 494.47 | 209.06 | 42% | 285.41 | 58%  | 146.66 | 51% | 10% | 138.75 | 28%  | 44.67 | 32% | 4% | 94.07  | 19%  |
| 2000  | MT0366000 | PA VALE DA ESPERANÇA    | 19.76  | 11.69  | 59% | 8.07   | 41%  | 2.51   | 31% | 6%  | 5.56   | 28%  | 0.47  | 9%  | 1% | 5.09   | 26%  |
| 2000  | MT0443000 | PE JOÃO PONCE DE ARRUDA | 1.09   | 0.00   | 0%  | 1.09   | 100% | 0.00   | 0%  | 0%  | 1.09   | 100% | 0.00  | 0%  | 0% | 1.09   | 100% |
| 2000  | MT0444000 | PA FLORESTAN FERNANDES  | 43.57  | 40.29  | 92% | 3.28   | 8%   | 0.25   | 8%  | 2%  | 3.03   | 7%   | 0.22  | 7%  | 1% | 2.81   | 6%   |
| 2000  | PA0250000 | PA JOÃO BATISTA II      | 21.15  | 16.36  | 77% | 4.79   | 23%  | 1.87   | 39% | 8%  | 2.92   | 14%  | 0.02  | 1%  | 0% | 2.90   | 14%  |
| 2000  | RO0110000 | PA MARIA MENDES         | 17.16  | 2.59   | 15% | 14.57  | 85%  | 6.88   | 47% | 9%  | 7.69   | 45%  | 4.03  | 52% | 7% | 3.65   | 21%  |
| 2000  | RO0111000 | PA NELSON ALVES         | 9.38   | 7.38   | 79% | 1.99   | 21%  | 0.33   | 17% | 3%  | 1.66   | 18%  | 0.56  | 34% | 4% | 1.10   | 12%  |
| 2000  | RO0112000 | PA JANDAIRA             | 10.18  | 3.48   | 34% | 6.70   | 66%  | 2.41   | 36% | 7%  | 4.29   | 42%  | 1.78  | 41% | 5% | 2.51   | 25%  |
| 2000  | RO0113000 | PA JOANA D ARC I        | 219.67 | 31.65  | 14% | 188.02 | 86%  | 26.98  | 14% | 3%  | 161.04 | 73%  | 29.47 | 18% | 2% | 131.57 | 60%  |
| 2000  | RO0114000 | PA JOANA D ARC II       | 147.15 | 9.06   | 6%  | 138.09 | 94%  | 13.85  | 10% | 2%  | 124.24 | 84%  | 12.96 | 10% | 1% | 111.28 | 76%  |
| 2000  | RO0115000 | PA JOANA D ARC III      | 241.57 | 4.14   | 2%  | 237.43 | 98%  | 22.09  | 9%  | 2%  | 215.34 | 89%  | 23.78 | 11% | 1% | 191.56 | 79%  |
| 2000  | RO0116000 | PA FRANCISCO JOAO       | 135.35 | 50.68  | 37% | 84.68  | 63%  | 37.16  | 44% | 9%  | 47.52  | 35%  | 8.21  | 17% | 2% | 39.30  | 29%  |
| 2000  | RO0117000 | PA FLORIANO MAGNO       | 164.28 | 43.16  | 26% | 121.11 | 74%  | 56.49  | 47% | 9%  | 64.62  | 39%  | 13.46 | 21% | 3% | 51.16  | 31%  |
| 2000  | RO0118000 | PA ESMOSINA PINHO       | 115.19 | 42.90  | 37% | 72.29  | 63%  | 27.53  | 38% | 8%  | 44.76  | 39%  | 15.44 | 34% | 4% | 29.33  | 25%  |
| 2000  | RO0119000 | PA IVO INACIO           | 126.44 | 37.63  | 30% | 88.81  | 70%  | 31.35  | 35% | 7%  | 57.46  | 45%  | 4.83  | 8%  | 1% | 52.63  | 42%  |
| 2000  | RO0120000 | PA NOVA VIDA            | 85.84  | 42.89  | 50% | 42.96  | 50%  | 24.45  | 57% | 11% | 18.51  | 22%  | 3.77  | 20% | 3% | 14.75  | 17%  |
| 2000  | RO0121000 | PA SÃO JOSÉ DO BURITIS  | 91.29  | 55.96  | 61% | 35.32  | 39%  | 21.60  | 61% | 12% | 13.73  | 15%  | 4.56  | 33% | 4% | 9.17   | 10%  |

|      |           |                                 |        |       |      |        |      |       |     |     |        |     |       |     |    |        |     |
|------|-----------|---------------------------------|--------|-------|------|--------|------|-------|-----|-----|--------|-----|-------|-----|----|--------|-----|
| 2000 | RO0122000 | PA SÃO PAULO                    | 48.03  | 12.59 | 26%  | 35.44  | 74%  | 21.21 | 60% | 12% | 14.23  | 30% | 6.45  | 45% | 6% | 7.78   | 16% |
| 2000 | RO0123000 | PA NILSON CAMPOS                | 125.19 | 31.38 | 25%  | 93.81  | 75%  | 21.79 | 23% | 5%  | 72.02  | 58% | 16.14 | 22% | 3% | 55.88  | 45% |
| 2000 | RO0125000 | PA ORIENTE                      | 96.63  | 43.40 | 45%  | 53.23  | 55%  | 26.50 | 50% | 10% | 26.73  | 28% | 5.59  | 21% | 3% | 21.14  | 22% |
| 2000 | TO0201000 | PA CONQUISTA                    | 22.14  | 18.97 | 86%  | 3.17   | 14%  | 3.08  | 97% | 19% | 0.09   | 0%  | 0.00  | 0%  | 0% | 0.09   | 0%  |
| 2000 | TO0212000 | PA SÃO SEBASTIÃO                | 22.60  | 16.90 | 75%  | 5.71   | 25%  | 4.16  | 73% | 15% | 1.55   | 7%  | 0.85  | 55% | 7% | 0.70   | 3%  |
| 2000 | TO0267000 | PA SOSSEGO                      | 4.68   | 4.68  | 100% | 0.00   | 0%   | 0.00  |     |     | 0.00   | 0%  | 0.00  |     |    | 0.00   | 0%  |
| 2001 | AC0068000 | PDS SÃO SALVADOR                | 508.97 | 21.51 | 4%   | 487.46 | 96%  | 7.26  | 1%  | 0%  | 480.20 | 94% | 3.44  | 1%  | 0% | 476.77 | 94% |
| 2001 | AC0070000 | PA TUPÁ                         | 61.90  | 25.31 | 41%  | 36.59  | 59%  | 2.60  | 7%  | 2%  | 33.99  | 55% | 4.10  | 12% | 2% | 29.90  | 48% |
| 2001 | AC0071000 | PAE EQUADOR                     | 78.71  | 7.40  | 9%   | 71.32  | 91%  | 2.75  | 4%  | 1%  | 68.57  | 87% | 1.08  | 2%  | 0% | 67.49  | 86% |
| 2001 | AC0072000 | PAE CRUZEIRO DO VALE            | 779.68 | 6.59  | 1%   | 773.10 | 99%  | 4.20  | 1%  | 0%  | 768.90 | 99% | 7.88  | 1%  | 0% | 761.01 | 98% |
| 2001 | AC0074000 | PA NARCISO ASSUNÇÃO             | 49.44  | 1.58  | 3%   | 47.86  | 97%  | 1.10  | 2%  | 1%  | 46.75  | 95% | 3.86  | 8%  | 1% | 42.89  | 87% |
| 2001 | AC0075000 | PA PEDRO FIRMINO                | 63.93  | 1.54  | 2%   | 62.40  | 98%  | 2.38  | 4%  | 1%  | 60.01  | 94% | 4.22  | 7%  | 1% | 55.80  | 87% |
| 2001 | AC0076000 | PA ZAQUEU MACHADO               | 37.58  | 33.07 | 88%  | 4.52   | 12%  | 1.56  | 35% | 9%  | 2.96   | 8%  | 0.19  | 7%  | 1% | 2.76   | 7%  |
| 2001 | AC0077000 | PE POLO AGROF. DOM MOACIR       | 3.21   | 2.85  | 89%  | 0.36   | 11%  | 0.01  | 2%  | 0%  | 0.35   | 11% | 0.00  | 0%  | 0% | 0.35   | 11% |
| 2001 | AC0078000 | PA PORFIRIO PONCIANO            | 17.59  | 0.05  | 0%   | 17.54  | 100% | 0.04  | 0%  | 0%  | 17.50  | 99% | 0.02  | 0%  | 0% | 17.48  | 99% |
| 2001 | AC0079000 | PE POLO AGROFLORESTAL BRASILÉIA | 5.39   | 3.49  | 65%  | 1.90   | 35%  | 0.50  | 26% | 7%  | 1.40   | 26% | 0.19  | 14% | 2% | 1.20   | 22% |
| 2001 | AC0081000 | PE POLO AGROF. WILSON PINHEIRO  | 3.01   | 1.62  | 54%  | 1.39   | 46%  | 0.88  | 64% | 16% | 0.51   | 17% | 0.01  | 2%  | 0% | 0.50   | 16% |
| 2001 | AC0083000 | PE POLO AGROF. MÂNCIO LIMA      | 3.76   | 1.94  | 52%  | 1.82   | 48%  | 0.13  | 7%  | 2%  | 1.70   | 45% | 0.19  | 11% | 1% | 1.51   | 40% |

|      |           |                                   |       |       |      |       |     |      |     |     |       |     |       |     |    |       |     |
|------|-----------|-----------------------------------|-------|-------|------|-------|-----|------|-----|-----|-------|-----|-------|-----|----|-------|-----|
| 2001 | AC0084000 | PE POLO AGROF.<br>CRUZEIRO DO SUL | 3.20  | 1.63  | 51%  | 1.57  | 49% | 0.06 | 4%  | 1%  | 1.51  | 47% | 0.13  | 8%  | 1% | 1.38  | 43% |
| 2001 | AC0089000 | PE POLO LEITEIRO<br>DE PORTO ACRE | 2.05  | 1.86  | 90%  | 0.20  | 10% | 0.11 | 57% | 14% | 0.09  | 4%  | 0.01  | 15% | 2% | 0.07  | 4%  |
| 2001 | AC0090000 | PE POLO AGROF.<br>EPITACIOLÂNDIA  | 1.30  | 0.47  | 36%  | 0.83  | 64% | 0.14 | 17% | 4%  | 0.69  | 53% | 0.00  | 0%  | 0% | 0.69  | 53% |
| 2001 | AM0042000 | PAE MATUPIRI                      | 82.21 | 2.47  | 3%   | 79.74 | 97% | 0.15 | 0%  | 0%  | 79.58 | 97% | 0.57  | 1%  | 0% | 79.02 | 96% |
| 2001 | MA0546000 | PA QUADRA BOA<br>VIDA             | 3.17  | 2.62  | 83%  | 0.55  | 17% | 0.01 | 1%  | 0%  | 0.54  | 17% | 0.35  | 64% | 8% | 0.20  | 6%  |
| 2001 | MA0553000 | PCA VASSORAL                      | 1.14  | 1.14  | 100% | 0.00  | 0%  | 0.00 |     |     | 0.00  | 0%  | 0.00  |     | 0% | 0.00  | 0%  |
| 2001 | MA0555000 | PA XIXANDÁ                        | 21.13 | 15.62 | 74%  | 5.51  | 26% | 1.35 | 24% | 6%  | 4.16  | 20% | 2.54  | 61% | 8% | 1.62  | 8%  |
| 2001 | MA0566000 | PA NOVO<br>HORIZONTE II           | 2.42  | 2.42  | 100% | 0.00  | 0%  | 0.00 |     |     | 0.00  | 0%  | 0.00  |     | 0% | 0.00  | 0%  |
| 2001 | MA0580000 | PA PADRE JOSIMO I                 | 12.07 | 12.07 | 100% | 0.00  | 0%  | 0.00 |     |     | 0.00  | 0%  | 0.00  |     | 0% | 0.00  | 0%  |
| 2001 | MA0581000 | PA BOA ESPERANÇA<br>III           | 45.50 | 21.19 | 47%  | 24.31 | 53% | 7.07 | 29% | 7%  | 17.24 | 38% | 7.45  | 43% | 5% | 9.79  | 22% |
| 2001 | MA0583000 | PA COCALINHO                      | 7.19  | 7.19  | 100% | 0.00  | 0%  | 0.00 |     |     | 0.00  | 0%  | 0.00  |     | 0% | 0.00  | 0%  |
| 2001 | MA0584000 | PA QUIXABA                        | 4.98  | 4.98  | 100% | 0.00  | 0%  | 0.00 |     |     | 0.00  | 0%  | 0.00  |     | 0% | 0.00  | 0%  |
| 2001 | MA0592000 | PA ALVORADA IV                    | 34.44 | 34.24 | 99%  | 0.20  | 1%  | 0.17 | 85% | 21% | 0.03  | 0%  | 0.01  | 27% | 3% | 0.02  | 0%  |
| 2001 | MB0292000 | PA LARANJEIRAS                    | 72.92 | 29.29 | 40%  | 43.63 | 60% | 8.00 | 18% | 5%  | 35.63 | 49% | 17.89 | 50% | 6% | 17.74 | 24% |
| 2001 | MB0306000 | PA BEIRA RIO                      | 18.71 | 1.26  | 7%   | 17.45 | 93% | 4.63 | 27% | 7%  | 12.82 | 69% | 7.18  | 56% | 7% | 5.64  | 30% |
| 2001 | MB0307000 | PA BURGO                          | 35.94 | 25.07 | 70%  | 10.87 | 30% | 3.96 | 36% | 9%  | 6.92  | 19% | 2.40  | 35% | 4% | 4.52  | 13% |
| 2001 | MB0308000 | PA CARIMÃ                         | 20.80 | 7.95  | 38%  | 12.85 | 62% | 2.61 | 20% | 5%  | 10.24 | 49% | 3.99  | 39% | 5% | 6.25  | 30% |
| 2001 | MB0309000 | PA BELO MIRAR                     | 34.92 | 26.83 | 77%  | 8.09  | 23% | 4.88 | 60% | 15% | 3.20  | 9%  | 1.26  | 39% | 5% | 1.94  | 6%  |
| 2001 | MB0310000 | PA NOSSA SENHORA<br>DAS GRAÇAS    | 35.65 | 29.35 | 82%  | 6.30  | 18% | 3.20 | 51% | 13% | 3.10  | 9%  | 1.40  | 45% | 6% | 1.70  | 5%  |
| 2001 | MB0311000 | PA BOCA DO LAGO                   | 33.72 | 18.00 | 53%  | 15.72 | 47% | 7.93 | 50% | 13% | 7.80  | 23% | 3.13  | 40% | 5% | 4.66  | 14% |

|      |           |                                |        |       |     |        |      |       |     |     |        |     |       |     |    |       |     |
|------|-----------|--------------------------------|--------|-------|-----|--------|------|-------|-----|-----|--------|-----|-------|-----|----|-------|-----|
| 2001 | MB0313000 | PA BORRACHEIRA                 | 25.68  | 7.61  | 30% | 18.06  | 70%  | 6.52  | 36% | 9%  | 11.54  | 45% | 7.30  | 63% | 8% | 4.24  | 17% |
| 2001 | MB0314000 | PA ARICA                       | 16.54  | 15.15 | 92% | 1.39   | 8%   | 1.38  | 99% | 25% | 0.01   | 0%  | 0.00  | 0%  | 0% | 0.01  | 0%  |
| 2001 | MB0315000 | PA MINEIRO PRETO               | 99.45  | 2.23  | 2%  | 97.23  | 98%  | 24.34 | 25% | 6%  | 72.89  | 73% | 40.12 | 55% | 7% | 32.77 | 33% |
| 2001 | MB0316000 | PA ALTO PACAJÁ                 | 134.60 | 9.13  | 7%  | 125.47 | 93%  | 20.71 | 17% | 4%  | 104.75 | 78% | 64.45 | 62% | 8% | 40.30 | 30% |
| 2001 | MB0317000 | PA BOCA LARGA                  | 69.66  | 3.65  | 5%  | 66.01  | 95%  | 14.64 | 22% | 6%  | 51.37  | 74% | 30.65 | 60% | 7% | 20.73 | 30% |
| 2001 | MB0318000 | PA JACARÉ-AÇÚ                  | 115.25 | 0.54  | 0%  | 114.72 | 100% | 14.59 | 13% | 3%  | 100.13 | 87% | 46.51 | 46% | 6% | 53.62 | 47% |
| 2001 | MB0319000 | PA JOSÉ CIRILO GOMES           | 101.80 | 8.32  | 8%  | 93.48  | 92%  | 18.86 | 20% | 5%  | 74.62  | 73% | 44.20 | 59% | 7% | 30.43 | 30% |
| 2001 | MB0320000 | PA RIO PRETO                   | 59.22  | 3.92  | 7%  | 55.31  | 93%  | 10.54 | 19% | 5%  | 44.77  | 76% | 23.64 | 53% | 7% | 21.13 | 36% |
| 2001 | MB0321000 | PA CASCALHO                    | 26.69  | 5.12  | 19% | 21.57  | 81%  | 3.25  | 15% | 4%  | 18.33  | 69% | 7.04  | 38% | 5% | 11.28 | 42% |
| 2001 | MB0322000 | PA NOVA VIDA                   | 29.89  | 6.19  | 21% | 23.69  | 79%  | 3.58  | 15% | 4%  | 20.11  | 67% | 9.35  | 46% | 6% | 10.77 | 36% |
| 2001 | MB0323000 | PA CASTANHAL RATO II           | 14.73  | 11.05 | 75% | 3.68   | 25%  | 1.41  | 38% | 10% | 2.27   | 15% | 1.12  | 49% | 6% | 1.15  | 8%  |
| 2001 | MB0324000 | PA SANTA MARIA                 | 21.58  | 1.53  | 7%  | 20.06  | 93%  | 2.18  | 11% | 3%  | 17.87  | 83% | 8.87  | 50% | 6% | 9.00  | 42% |
| 2001 | MB0325000 | PA SANTA LIDUINA               | 19.10  | 2.78  | 15% | 16.32  | 85%  | 2.17  | 13% | 3%  | 14.16  | 74% | 6.19  | 44% | 5% | 7.97  | 42% |
| 2001 | MB0326000 | PA IOLANDA                     | 34.38  | 9.30  | 27% | 25.08  | 73%  | 2.40  | 10% | 2%  | 22.68  | 66% | 12.16 | 54% | 7% | 10.52 | 31% |
| 2001 | MB0327000 | PA SÃO JOSE                    | 45.02  | 40.03 | 89% | 4.99   | 11%  | 2.05  | 41% | 10% | 2.94   | 7%  | 0.58  | 20% | 2% | 2.35  | 5%  |
| 2001 | MB0328000 | PA PAU FERRADO                 | 29.50  | 24.12 | 82% | 5.38   | 18%  | 3.61  | 67% | 17% | 1.77   | 6%  | 0.58  | 33% | 4% | 1.19  | 4%  |
| 2001 | MB0329000 | PA BEIJA FLOR II               | 11.66  | 0.80  | 7%  | 10.86  | 93%  | 0.78  | 7%  | 2%  | 10.07  | 86% | 4.77  | 47% | 6% | 5.30  | 45% |
| 2001 | MB0330000 | PA AMAPÁ I                     | 33.63  | 9.55  | 28% | 24.09  | 72%  | 2.97  | 12% | 3%  | 21.12  | 63% | 6.85  | 32% | 4% | 14.27 | 42% |
| 2001 | MB0331000 | PA ALTO AMAZONAS               | 24.11  | 1.53  | 6%  | 22.58  | 94%  | 2.43  | 11% | 3%  | 20.16  | 84% | 9.25  | 46% | 6% | 10.90 | 45% |
| 2001 | MB0332000 | PA BARRAGEIRA                  | 29.74  | 3.95  | 13% | 25.79  | 87%  | 3.23  | 13% | 3%  | 22.56  | 76% | 5.46  | 24% | 3% | 17.10 | 58% |
| 2001 | MB0333000 | PA CACHOEIRINHA                | 12.53  | 1.02  | 8%  | 11.51  | 92%  | 2.65  | 23% | 6%  | 8.86   | 71% | 4.78  | 54% | 7% | 4.07  | 33% |
| 2001 | MB0334000 | PA AMAPA II                    | 25.18  | 8.17  | 32% | 17.00  | 68%  | 1.77  | 10% | 3%  | 15.23  | 61% | 3.62  | 24% | 3% | 11.62 | 46% |
| 2001 | MB0335000 | PA SÃO GERALDO DO REPARTIMENTO | 20.97  | 0.73  | 3%  | 20.24  | 97%  | 1.94  | 10% | 2%  | 18.30  | 87% | 8.77  | 48% | 6% | 9.53  | 45% |
| 2001 | MB0336000 | PA NOVO MUNDO DO               | 12.41  | 7.48  | 60% | 4.93   | 40%  | 0.58  | 12% | 3%  | 4.35   | 35% | 1.79  | 41% | 5% | 2.55  | 21% |

| ITUPIRANGA |           |                              |        |       |      |        |      |       |     |     |        |     |       |     |     |        |     |
|------------|-----------|------------------------------|--------|-------|------|--------|------|-------|-----|-----|--------|-----|-------|-----|-----|--------|-----|
| 2001       | MB0337000 | PA BOA ESPERANÇA DO ARAGUAIA | 27.13  | 23.30 | 86%  | 3.83   | 14%  | 2.20  | 57% | 14% | 1.63   | 6%  | 0.42  | 26% | 3%  | 1.21   | 4%  |
| 2001       | MB0338000 | PA UNIÃO                     | 29.27  | 11.23 | 38%  | 18.04  | 62%  | 2.76  | 15% | 4%  | 15.28  | 52% | 4.88  | 32% | 4%  | 10.40  | 36% |
| 2001       | MB0339000 | PA JERUZALÉM                 | 26.12  | 15.71 | 60%  | 10.41  | 40%  | 0.80  | 8%  | 2%  | 9.60   | 37% | 2.47  | 26% | 3%  | 7.13   | 27% |
| 2001       | MB0340000 | PA SANTA TEREZINHA           | 24.56  | 10.67 | 43%  | 13.89  | 57%  | 9.95  | 72% | 18% | 3.94   | 16% | 2.12  | 54% | 7%  | 1.82   | 7%  |
| 2001       | MB0341000 | PA SAMAUMA                   | 15.51  | 9.80  | 63%  | 5.70   | 37%  | 1.74  | 30% | 8%  | 3.97   | 26% | 2.53  | 64% | 8%  | 1.44   | 9%  |
| 2001       | MB0342000 | PA MARRECAS DO ARAGUAIA      | 34.65  | 25.15 | 73%  | 9.49   | 27%  | 3.54  | 37% | 9%  | 5.95   | 17% | 1.50  | 25% | 3%  | 4.45   | 13% |
| 2001       | MB0343000 | PA CUXIÚ                     | 4.96   | 1.00  | 20%  | 3.96   | 80%  | 0.41  | 10% | 3%  | 3.55   | 72% | 1.34  | 38% | 5%  | 2.21   | 45% |
| 2001       | MB0344000 | PA JOSE PINHEIRO LIMA        | 39.89  | 8.36  | 21%  | 31.53  | 79%  | 4.96  | 16% | 4%  | 26.58  | 67% | 17.37 | 65% | 8%  | 9.21   | 23% |
| 2001       | MB0345000 | PA JURUNA                    | 122.11 | 21.01 | 17%  | 101.10 | 83%  | 6.71  | 7%  | 2%  | 94.39  | 77% | 32.04 | 34% | 4%  | 62.35  | 51% |
| 2001       | MB0346000 | PA PALMARES SUL              | 156.06 | 95.93 | 61%  | 60.13  | 39%  | 14.10 | 23% | 6%  | 46.03  | 29% | 16.77 | 36% | 5%  | 29.26  | 19% |
| 2001       | MT0278000 | PA ROSELI NUNES              | 95.21  | 40.85 | 43%  | 54.36  | 57%  | 23.84 | 44% | 11% | 30.52  | 32% | 14.34 | 47% | 6%  | 16.18  | 17% |
| 2001       | MT0331000 | PA SANTO ANTONIO DO BELEZA   | 124.45 | 15.66 | 13%  | 108.80 | 87%  | 54.70 | 50% | 13% | 54.09  | 43% | 29.64 | 55% | 7%  | 24.45  | 20% |
| 2001       | MT0457000 | PA POUSO ALEGRE              | 22.10  | 4.40  | 20%  | 17.70  | 80%  | 3.44  | 19% | 5%  | 14.26  | 65% | 5.29  | 37% | 5%  | 8.97   | 41% |
| 2001       | MT0458000 | PA SANTO EXPEDITO            | 11.35  | 11.34 | 100% | 0.01   | 0%   | 0.00  | 0%  | 0%  | 0.01   | 0%  | 0.00  | 0%  | 0%  | 0.01   | 0%  |
| 2001       | MT0486000 | PE VIDA NOVA                 | 139.28 | 0.05  | 0%   | 139.23 | 100% | 11.68 | 8%  | 2%  | 127.55 | 92% | 21.34 | 17% | 2%  | 106.20 | 76% |
| 2001       | MT0491000 | PA GUAPORÉ                   | 87.80  | 25.03 | 29%  | 62.77  | 71%  | 22.90 | 36% | 9%  | 39.87  | 45% | 8.84  | 22% | 3%  | 31.03  | 35% |
| 2001       | MT0494000 | PA BARRA NORTE               | 36.59  | 8.14  | 22%  | 28.45  | 78%  | 15.80 | 56% | 14% | 12.65  | 35% | 5.13  | 41% | 5%  | 7.52   | 21% |
| 2001       | PA0251000 | PA CANAÃ                     | 39.21  | 35.32 | 90%  | 3.89   | 10%  | 1.65  | 42% | 11% | 2.24   | 6%  | 1.08  | 48% | 6%  | 1.16   | 3%  |
| 2001       | PA0253000 | PA TRÊS IRMÃOS               | 34.73  | 7.18  | 21%  | 27.54  | 79%  | 11.26 | 41% | 10% | 16.29  | 47% | 5.68  | 35% | 4%  | 10.61  | 31% |
| 2001       | PA0254000 | PA TIMBORANA                 | 32.42  | 22.12 | 68%  | 10.30  | 32%  | 4.24  | 41% | 10% | 6.06   | 19% | 4.73  | 78% | 10% | 1.33   | 4%  |
| 2001       | PA0261000 | PCA MÁRTIRES DE              | 4.08   | 2.67  | 65%  | 1.41   | 35%  | 0.15  | 11% | 3%  | 1.26   | 31% | 0.01  | 1%  | 0%  | 1.24   | 30% |

| ABRIL |           |                                 |        |       |      |        |      |       |     |     |        |      |       |     |    |        |      |
|-------|-----------|---------------------------------|--------|-------|------|--------|------|-------|-----|-----|--------|------|-------|-----|----|--------|------|
| 2001  | RO0126000 | PA EDMILSON PASTOR              | 4.16   | 0.72  | 17%  | 3.44   | 83%  | 0.15  | 4%  | 1%  | 3.29   | 79%  | 0.00  | 0%  | 0% | 3.29   | 79%  |
| 2001  | RO0127000 | PA PADRE EZEQUIEL               | 59.73  | 28.12 | 47%  | 31.61  | 53%  | 4.92  | 16% | 4%  | 26.69  | 45%  | 1.02  | 4%  | 0% | 25.67  | 43%  |
| 2001  | RO0129000 | PA PARAISO DAS ACÁCIAS          | 5.83   | 1.53  | 26%  | 4.30   | 74%  | 3.36  | 78% | 20% | 0.94   | 16%  | 0.17  | 18% | 2% | 0.77   | 13%  |
| 2001  | RO0131000 | PA JATOBÁ                       | 67.53  | 15.20 | 23%  | 52.33  | 77%  | 22.39 | 43% | 11% | 29.94  | 44%  | 11.13 | 37% | 5% | 18.81  | 28%  |
| 2001  | RO0132000 | PCA NOVO ALVORECER              | 7.25   | 6.66  | 92%  | 0.59   | 8%   | 0.20  | 34% | 9%  | 0.39   | 5%   | 0.09  | 24% | 3% | 0.29   | 4%   |
| 2001  | RO0133000 | PA BOM PRINCÍPIO II             | 24.16  | 22.05 | 91%  | 2.12   | 9%   | 1.22  | 58% | 14% | 0.89   | 4%   | 0.38  | 43% | 5% | 0.51   | 2%   |
| 2001  | RO0134000 | PA BELA VISTA                   | 17.48  | 8.82  | 50%  | 8.66   | 50%  | 2.88  | 33% | 8%  | 5.78   | 33%  | 0.21  | 4%  | 0% | 5.56   | 32%  |
| 2001  | RO0135000 | PA SERRA GRANDE                 | 74.22  | 10.87 | 15%  | 63.34  | 85%  | 23.44 | 37% | 9%  | 39.91  | 54%  | 18.74 | 47% | 6% | 21.17  | 29%  |
| 2001  | RO0136000 | PA SÃO FRANCISCO DO GUAPORÉ     | 43.19  | 33.91 | 79%  | 9.28   | 21%  | 5.16  | 56% | 14% | 4.13   | 10%  | 2.87  | 70% | 9% | 1.25   | 3%   |
| 2001  | RO0149000 | PA ROSANA LECY                  | 30.04  | 0.06  | 0%   | 29.98  | 100% | 6.65  | 22% | 6%  | 23.33  | 78%  | 7.08  | 30% | 4% | 16.24  | 54%  |
| 2001  | RR0037000 | PA NOVA AMAZONIA                | 0.52   | 0.00  | 0%   | 0.52   | 100% | 0.00  | 0%  | 0%  | 0.52   | 100% | 0.00  | 0%  | 0% | 0.52   | 100% |
| 2001  | SM0065000 | PA ÁREA CUMINÁ E TROMBETAS      | 232.93 | 50.80 | 22%  | 182.13 | 78%  | 8.54  | 5%  | 1%  | 173.59 | 75%  | 15.74 | 9%  | 1% | 157.85 | 68%  |
| 2001  | SM0066000 | PDS IGARAPÉ DO ANTA E CURUÁ UMA | 105.85 | 0.17  | 0%   | 105.69 | 100% | 0.66  | 1%  | 0%  | 105.03 | 99%  | 1.59  | 2%  | 0% | 103.44 | 98%  |
| 2001  | TO0268000 | PA ITACOLOMI                    | 10.20  | 10.20 | 100% | 0.00   | 0%   | 0.00  |     |     | 0.00   | 0%   | 0.00  |     | 0% | 0.00   | 0%   |
| 2001  | TO0276000 | PA CACHOEIRINHA                 | 6.58   | 6.54  | 99%  | 0.04   | 1%   | 0.00  | 0%  | 0%  | 0.04   | 1%   | 0.00  | 0%  | 0% | 0.04   | 1%   |
| 2001  | TO0278000 | PA PONTÃO                       | 2.99   | 2.99  | 100% | 0.00   | 0%   | 0.00  |     |     | 0.00   | 0%   | 0.00  |     | 0% | 0.00   | 0%   |
| 2001  | TO0279000 | PA BASTÃO VELHO                 | 0.24   | 0.24  | 100% | 0.00   | 0%   | 0.00  |     |     | 0.00   | 0%   | 0.00  |     | 0% | 0.00   | 0%   |
| 2001  | TO0284000 | PA SÃO GABRIEL                  | 44.81  | 12.19 | 27%  | 32.62  | 73%  | 15.35 | 47% | 12% | 17.27  | 39%  | 6.95  | 40% | 5% | 10.32  | 23%  |
| 2002  | AC0082000 | PE POLO AGROF.                  | 2.59   | 1.77  | 69%  | 0.81   | 31%  | 0.04  | 5%  | 2%  | 0.78   | 30%  | 0.23  | 30% | 4% | 0.54   | 21%  |

| RODRIGUES ALVES |           |                             |        |       |      |        |      |       |     |     |        |      |       |     |    |        |     |
|-----------------|-----------|-----------------------------|--------|-------|------|--------|------|-------|-----|-----|--------|------|-------|-----|----|--------|-----|
| 2002            | AC0085000 | PE POLO AGROF.<br>XAPURI I  | 3.65   | 1.33  | 36%  | 2.32   | 64%  | 0.48  | 21% | 7%  | 1.84   | 50%  | 0.32  | 17% | 2% | 1.52   | 42% |
| 2002            | AC0086000 | PE POLO AGROF.<br>XAPURI II | 2.31   | 2.02  | 87%  | 0.29   | 13%  | 0.00  | 0%  | 0%  | 0.29   | 13%  | 0.00  | 0%  | 0% | 0.29   | 13% |
| 2002            | AC0091000 | PA BERLIM RECREIO           | 244.51 | 81.09 | 33%  | 163.42 | 67%  | 14.12 | 9%  | 3%  | 149.29 | 61%  | 25.11 | 17% | 2% | 124.18 | 51% |
| 2002            | AC0092000 | PA JOAQUIM DE<br>MATOS      | 52.24  | 7.88  | 15%  | 44.36  | 85%  | 11.49 | 26% | 9%  | 32.87  | 63%  | 7.45  | 23% | 3% | 25.41  | 49% |
| 2002            | AM0045000 | PA PIABA                    | 33.96  | 2.52  | 7%   | 31.43  | 93%  | 2.50  | 8%  | 3%  | 28.93  | 85%  | 2.10  | 7%  | 1% | 26.84  | 79% |
| 2002            | AM0048000 | PA BÓIA                     | 63.06  | 3.93  | 6%   | 59.13  | 94%  | 1.54  | 3%  | 1%  | 57.59  | 91%  | 0.95  | 2%  | 0% | 56.64  | 90% |
| 2002            | AP0035000 | PA IGARAPÉ<br>GRANDE        | 11.74  | 0.00  | 0%   | 11.74  | 100% | 0.00  | 0%  | 0%  | 11.74  | 100% | 1.85  | 16% | 2% | 9.90   | 84% |
| 2002            | MA0593000 | PE MARACUJÁ                 | 3.45   | 0.36  | 10%  | 3.09   | 90%  | 0.03  | 1%  | 0%  | 3.06   | 89%  | 1.69  | 55% | 7% | 1.37   | 40% |
| 2002            | MA0600000 | PE LARANJAL                 | 9.62   | 9.62  | 100% | 0.00   | 0%   | 0.00  |     |     | 0.00   | 0%   | 0.00  |     | 0% | 0.00   | 0%  |
| 2002            | MA0602000 | PE PROMISSÃO                | 1.80   | 1.80  | 100% | 0.00   | 0%   | 0.00  |     |     | 0.00   | 0%   | 0.00  |     | 0% | 0.00   | 0%  |
| 2002            | MA0603000 | PE RIO GRANDE               | 3.51   | 0.48  | 14%  | 3.03   | 86%  | 1.18  | 39% | 13% | 1.84   | 53%  | 1.07  | 58% | 7% | 0.78   | 22% |
| 2002            | MA0604000 | PA CANAÃ                    | 8.37   | 8.37  | 100% | 0.00   | 0%   | 0.00  |     |     | 0.00   | 0%   | 0.00  |     | 0% | 0.00   | 0%  |
| 2002            | MA0605000 | PA BOA VISTA II             | 5.95   | 5.95  | 100% | 0.00   | 0%   | 0.00  |     |     | 0.00   | 0%   | 0.00  |     | 0% | 0.00   | 0%  |
| 2002            | MA0606000 | PA EL BETEL                 | 3.11   | 3.11  | 100% | 0.00   | 0%   | 0.00  |     |     | 0.00   | 0%   | 0.00  |     | 0% | 0.00   | 0%  |
| 2002            | MA0607000 | PA CRUZEIRO DO<br>SUL       | 11.13  | 6.50  | 58%  | 4.63   | 42%  | 0.49  | 11% | 4%  | 4.14   | 37%  | 3.01  | 73% | 9% | 1.13   | 10% |
| 2002            | MA0609000 | PA SUCESSO                  | 4.21   | 4.21  | 100% | 0.00   | 0%   | 0.00  |     |     | 0.00   | 0%   | 0.00  |     | 0% | 0.00   | 0%  |
| 2002            | MA0610000 | PA IPIRANGA                 | 2.02   | 2.02  | 100% | 0.00   | 0%   | 0.00  |     |     | 0.00   | 0%   | 0.00  |     | 0% | 0.00   | 0%  |
| 2002            | MA0611000 | PA MONTE LÍRIO              | 6.92   | 6.92  | 100% | 0.00   | 0%   | 0.00  |     |     | 0.00   | 0%   | 0.00  |     | 0% | 0.00   | 0%  |
| 2002            | MA0612000 | PA TAMANDARÉ                | 4.63   | 4.63  | 100% | 0.00   | 0%   | 0.00  |     |     | 0.00   | 0%   | 0.00  |     | 0% | 0.00   | 0%  |
| 2002            | MA0614000 | PA FÉ EM DEUS               | 5.84   | 5.84  | 100% | 0.00   | 0%   | 0.00  |     |     | 0.00   | 0%   | 0.00  |     | 0% | 0.00   | 0%  |
| 2002            | MA0615000 | PA BOA ESPERANÇA            | 8.97   | 8.97  | 100% | 0.00   | 0%   | 0.00  |     |     | 0.00   | 0%   | 0.00  |     | 0% | 0.00   | 0%  |



| I    |           |                           |         |        |      |        |     |       |     |     |        |     |       |     |    |        |     |
|------|-----------|---------------------------|---------|--------|------|--------|-----|-------|-----|-----|--------|-----|-------|-----|----|--------|-----|
| 2002 | MA0618000 | PA VALE DO IPÊ            | 3.78    | 3.23   | 85%  | 0.55   | 15% | 0.24  | 44% | 15% | 0.31   | 8%  | 0.08  | 26% | 3% | 0.23   | 6%  |
| 2002 | MA0619000 | PA ALTO BOA VISTA         | 21.06   | 9.33   | 44%  | 11.73  | 56% | 2.39  | 20% | 7%  | 9.34   | 44% | 4.81  | 51% | 6% | 4.54   | 22% |
| 2002 | MA0635000 | PA 6 DE MARÇO             | 3.14    | 3.14   | 100% | 0.00   | 0%  | 0.00  |     |     | 0.00   | 0%  | 0.00  |     | 0% | 0.00   | 0%  |
| 2002 | MA0640000 | PA REFUGIO                | 27.61   | 21.99  | 80%  | 5.62   | 20% | 0.08  | 1%  | 0%  | 5.54   | 20% | 1.17  | 21% | 3% | 4.37   | 16% |
| 2002 | MA0646000 | PA ÁGUA FRIA DO<br>ITINGA | 74.41   | 36.09  | 48%  | 38.32  | 52% | 14.28 | 37% | 12% | 24.05  | 32% | 12.54 | 52% | 7% | 11.50  | 15% |
| 2002 | MA0647000 | PA AGRÍCOLA 2002          | 25.04   | 24.66  | 98%  | 0.38   | 2%  | 0.04  | 11% | 4%  | 0.34   | 1%  | 0.00  | 0%  | 0% | 0.34   | 1%  |
| 2002 | MA0648000 | PA PIMENTA                | 2.82    | 2.82   | 100% | 0.00   | 0%  | 0.00  |     |     | 0.00   | 0%  | 0.00  |     | 0% | 0.00   | 0%  |
| 2002 | MA0649000 | PA QUADRA<br>DIAMANTE     | 1.02    | 1.02   | 100% | 0.00   | 0%  | 0.00  |     |     | 0.00   | 0%  | 0.00  |     | 0% | 0.00   | 0%  |
| 2002 | MA0650000 | PA BELÉM                  | 5.91    | 5.91   | 100% | 0.00   | 0%  | 0.00  |     |     | 0.00   | 0%  | 0.00  |     | 0% | 0.00   | 0%  |
| 2002 | MA0651000 | PA CUTIA/BAIÚNA           | 54.88   | 54.88  | 100% | 0.00   | 0%  | 0.00  |     |     | 0.00   | 0%  | 0.00  |     | 0% | 0.00   | 0%  |
| 2002 | MA0655000 | PA BURITIATÁ              | 8.73    | 8.25   | 94%  | 0.48   | 6%  | 0.05  | 11% | 4%  | 0.43   | 5%  | 0.28  | 65% | 8% | 0.15   | 2%  |
| 2002 | MA0668000 | PA EL SHADAY              | 9.88    | 8.68   | 88%  | 1.20   | 12% | 0.10  | 8%  | 3%  | 1.11   | 11% | 0.00  | 0%  | 0% | 1.11   | 11% |
| 2002 | MB0347000 | PA ALCOBAÇA               | 1029.17 | 679.06 | 66%  | 350.12 | 34% | 89.87 | 26% | 9%  | 260.25 | 25% | 75.48 | 29% | 4% | 184.77 | 18% |
| 2002 | MB0351000 | PA IGARAPE DO<br>RATO     | 21.89   | 16.71  | 76%  | 5.18   | 24% | 1.83  | 35% | 12% | 3.36   | 15% | 1.14  | 34% | 4% | 2.22   | 10% |
| 2002 | MB0352000 | PA ARAÇATUBA<br>CARAJÁS   | 14.16   | 11.97  | 85%  | 2.19   | 15% | 0.89  | 41% | 14% | 1.30   | 9%  | 0.69  | 53% | 7% | 0.61   | 4%  |
| 2002 | MB0353000 | PA 4 DE JUNHO             | 11.94   | 5.49   | 46%  | 6.45   | 54% | 3.11  | 48% | 16% | 3.34   | 28% | 1.76  | 53% | 7% | 1.58   | 13% |
| 2002 | MB0354000 | PA JARDIM                 | 22.30   | 12.48  | 56%  | 9.82   | 44% | 2.22  | 23% | 8%  | 7.60   | 34% | 3.08  | 41% | 5% | 4.51   | 20% |
| 2002 | MB0355000 | PA FÊNIX                  | 14.54   | 12.51  | 86%  | 2.03   | 14% | 1.71  | 84% | 28% | 0.32   | 2%  | 0.09  | 30% | 4% | 0.22   | 2%  |
| 2002 | MB0356000 | PA JOSÉ DUTRA DA<br>COSTA | 29.27   | 15.69  | 54%  | 13.57  | 46% | 4.95  | 36% | 12% | 8.62   | 29% | 6.31  | 73% | 9% | 2.32   | 8%  |
| 2002 | MB0358000 | PA NOSSA SENHORA          | 34.05   | 21.48  | 63%  | 12.57  | 37% | 5.07  | 40% | 13% | 7.50   | 22% | 5.10  | 68% | 8% | 2.40   | 7%  |

|      |           |                             |        |            |     |        |      |       |     |     |       |      |       |     |     |       |     |
|------|-----------|-----------------------------|--------|------------|-----|--------|------|-------|-----|-----|-------|------|-------|-----|-----|-------|-----|
|      |           | APARECIDA                   |        |            |     |        |      |       |     |     |       |      |       |     |     |       |     |
| 2002 | MB0359000 | PA NOVA VITORIA             | 59.66  | 37.27      | 62% | 22.39  | 38%  | 5.62  | 25% | 8%  | 16.78 | 28%  | 12.05 | 72% | 9%  | 4.73  | 8%  |
| 2002 | MB0360000 | PA UNIDOS PARA<br>VENCER    | 21.18  | 7.49       | 35% | 13.69  | 65%  | 5.14  | 38% | 13% | 8.55  | 40%  | 5.45  | 64% | 8%  | 3.10  | 15% |
| 2002 | MB0361000 | PA PIQUIÁ                   | 44.87  | 39.90      | 89% | 4.97   | 11%  | 1.66  | 33% | 11% | 3.30  | 7%   | 0.60  | 18% | 2%  | 2.70  | 6%  |
| 2002 | MB0363000 | PA PIRASSUNUNGA             | 4.85   | 1.53       | 32% | 3.32   | 68%  | 0.46  | 14% | 5%  | 2.86  | 59%  | 0.98  | 34% | 4%  | 1.88  | 39% |
| 2002 | MT0604000 | PE RP                       | 62.48  | 40.15      | 64% | 22.32  | 36%  | 9.37  | 42% | 14% | 12.95 | 21%  | 3.48  | 27% | 3%  | 9.48  | 15% |
| 2002 | MT0608000 | PA GAVIÃO                   | 11.00  | 8.26       | 75% | 2.74   | 25%  | 0.85  | 31% | 10% | 1.89  | 17%  | 1.58  | 84% | 10% | 0.31  | 3%  |
| 2002 | MT0609000 | PA CECILIA<br>ANTUNES       | 11.58  | 10.47      | 90% | 1.10   | 10%  | 0.08  | 7%  | 2%  | 1.02  | 9%   | 0.00  | 0%  | 0%  | 1.02  | 9%  |
|      |           | PA TEODOMIRO                |        |            |     |        |      |       |     |     |       |      |       |     |     |       |     |
| 2002 | MT0615000 | FERREIRA DOS<br>SANTOS      | 114.11 | 91.00      | 80% | 23.11  | 20%  | 1.77  | 8%  | 3%  | 21.34 | 19%  | 1.92  | 9%  | 1%  | 19.43 | 17% |
| 2002 | MT0627000 | PA BOM SUCESSO              | 0.12   | 0.00       | 0%  | 0.12   | 100% | 0.00  | 0%  | 0%  | 0.12  | 100% | 0.01  | 10% | 1%  | 0.11  | 90% |
| 2002 | MT0628000 | PA RENASCER                 | 165.37 | 111.3<br>7 | 67% | 54.00  | 33%  | 9.39  | 17% | 6%  | 44.61 | 27%  | 4.20  | 9%  | 1%  | 40.41 | 24% |
| 2002 | PA0256000 | PA NOVA<br>CONQUISTA        | 13.98  | 12.78      | 91% | 1.20   | 9%   | 0.64  | 54% | 18% | 0.56  | 4%   | 0.00  | 0%  | 0%  | 0.56  | 4%  |
| 2002 | PA0257000 | PA OLHO D ÁGUA II           | 80.43  | 15.27      | 19% | 65.16  | 81%  | 0.42  | 1%  | 0%  | 64.74 | 80%  | 7.24  | 11% | 1%  | 57.50 | 71% |
| 2002 | RO0139000 | PA MARTIM<br>PESCADOR       | 154.44 | 114.2<br>6 | 74% | 40.18  | 26%  | 19.30 | 48% | 16% | 20.88 | 14%  | 8.22  | 39% | 5%  | 12.66 | 8%  |
| 2002 | RO0140000 | PA GOGÓ DA ONÇA             | 239.76 | 99.30      | 41% | 140.46 | 59%  | 50.48 | 36% | 12% | 89.98 | 38%  | 44.81 | 50% | 6%  | 45.17 | 19% |
| 2002 | RO0141000 | PA CAUTARINHO               | 163.58 | 73.56      | 45% | 90.02  | 55%  | 27.45 | 30% | 10% | 62.57 | 38%  | 22.96 | 37% | 5%  | 39.61 | 24% |
| 2002 | RO0142000 | PA SAGRADA<br>FAMÍLIA       | 50.67  | 22.74      | 45% | 27.93  | 55%  | 10.30 | 37% | 12% | 17.63 | 35%  | 7.75  | 44% | 5%  | 9.88  | 19% |
| 2002 | RO0143000 | PDS NAZARÉ E BOA<br>VITÓRIA | 35.14  | 7.30       | 21% | 27.84  | 79%  | 0.04  | 0%  | 0%  | 27.80 | 79%  | 0.54  | 2%  | 0%  | 27.25 | 78% |

|      |           |                                |        |       |      |        |     |       |     |     |        |     |       |     |    |       |     |
|------|-----------|--------------------------------|--------|-------|------|--------|-----|-------|-----|-----|--------|-----|-------|-----|----|-------|-----|
| 2002 | RO0146000 | PA IGARAPÉ DAS<br>ARARAS       | 154.44 | 15.06 | 10%  | 139.38 | 90% | 38.66 | 28% | 9%  | 100.72 | 65% | 20.84 | 21% | 3% | 79.88 | 52% |
| 2002 | RO0147000 | PA MARECHAL<br>RONDON          | 114.70 | 18.08 | 16%  | 96.63  | 84% | 29.81 | 31% | 10% | 66.81  | 58% | 10.12 | 15% | 2% | 56.69 | 49% |
| 2002 | RO0148000 | PA IGARAPÉ AZUL                | 106.12 | 10.54 | 10%  | 95.58  | 90% | 25.05 | 26% | 9%  | 70.53  | 66% | 23.06 | 33% | 4% | 47.47 | 45% |
| 2002 | RO0150000 | PA PAU BRASIL                  | 148.82 | 33.57 | 23%  | 115.25 | 77% | 38.23 | 33% | 11% | 77.02  | 52% | 14.93 | 19% | 2% | 62.09 | 42% |
| 2002 | RO0151000 | PA IGARAPE<br>TAQUARA          | 196.21 | 43.94 | 22%  | 152.26 | 78% | 37.18 | 24% | 8%  | 115.08 | 59% | 27.46 | 24% | 3% | 87.62 | 45% |
| 2002 | RO0152000 | PA PAU DARCO                   | 177.40 | 22.20 | 13%  | 155.20 | 87% | 50.05 | 32% | 11% | 105.15 | 59% | 25.47 | 24% | 3% | 79.69 | 45% |
| 2002 | RO0153000 | PA RIBEIRÃO                    | 129.01 | 17.20 | 13%  | 111.81 | 87% | 31.02 | 28% | 9%  | 80.79  | 63% | 17.69 | 22% | 3% | 63.09 | 49% |
| 2002 | RR0038000 | PA JACAMIM                     | 25.43  | 1.18  | 5%   | 24.24  | 95% | 0.00  | 0%  | 0%  | 24.24  | 95% | 1.71  | 7%  | 1% | 22.54 | 89% |
| 2002 | TO0297000 | PA TUCUMIRIM                   | 34.33  | 23.99 | 70%  | 10.34  | 30% | 3.66  | 35% | 12% | 6.69   | 19% | 1.90  | 28% | 4% | 4.79  | 14% |
| 2002 | TO0298000 | PA ARRAIAS                     | 13.87  | 11.55 | 83%  | 2.32   | 17% | 0.35  | 15% | 5%  | 1.97   | 14% | 0.43  | 22% | 3% | 1.54  | 11% |
| 2003 | AC0093000 | PCA CASULO<br>GERALDO MESQUITA | 2.23   | 2.16  | 97%  | 0.07   | 3%  | 0.00  | 0%  | 0%  | 0.07   | 3%  | 0.00  | 1%  | 0% | 0.07  | 3%  |
| 2003 | MA0608000 | PA 1° DE JUNHO                 | 2.87   | 2.86  | 100% | 0.00   | 0%  | 0.00  | 0%  | 0%  | 0.00   | 0%  | 0.00  | 0%  | 0% | 0.00  | 0%  |
| 2003 | MA0666000 | PA DEUS É FIEL                 | 13.36  | 10.95 | 82%  | 2.41   | 18% | 0.10  | 4%  | 2%  | 2.31   | 17% | 0.14  | 6%  | 1% | 2.17  | 16% |
| 2003 | MA0685000 | PA QUADRA SÃO<br>JOÃO BATISTA  | 1.89   | 1.89  | 100% | 0.00   | 0%  | 0.00  |     |     | 0.00   | 0%  | 0.00  |     | 0% | 0.00  | 0%  |
| 2003 | MA0686000 | PA QUADRA SÃO<br>RAIMUNDO      | 2.04   | 2.04  | 100% | 0.00   | 0%  | 0.00  |     |     | 0.00   | 0%  | 0.00  |     | 0% | 0.00  | 0%  |
| 2003 | MA0700000 | PA PASSO LIVRE                 | 56.53  | 9.37  | 17%  | 47.16  | 83% | 6.92  | 15% | 7%  | 40.24  | 71% | 7.25  | 18% | 2% | 32.99 | 58% |
| 2003 | MA0688000 | PE LARANJEIRAS /<br>MURTURA    | 1.20   | 0.97  | 81%  | 0.23   | 19% | 0.00  | 0%  | 0%  | 0.23   | 19% | 0.04  | 16% | 2% | 0.19  | 16% |
| 2003 | MA0725000 | PA FELIZ SÃO<br>FRANCISCO      | 2.58   | 2.58  | 100% | 0.00   | 0%  | 0.00  |     |     | 0.00   | 0%  | 0.00  |     | 0% | 0.00  | 0%  |
| 2003 | MA0727000 | PA SÃO VICENTE                 | 2.20   | 2.20  | 100% | 0.00   | 0%  | 0.00  |     |     | 0.00   | 0%  | 0.00  |     | 0% | 0.00  | 0%  |

|      |           |                             |       |       |      |       |     |      |     |     |       |     |       |     |    |       |     |
|------|-----------|-----------------------------|-------|-------|------|-------|-----|------|-----|-----|-------|-----|-------|-----|----|-------|-----|
| 2003 | MA0729000 | PA BEBE ÁGUA                | 2.39  | 2.39  | 100% | 0.00  | 0%  | 0.00 |     |     | 0.00  | 0%  | 0.00  |     | 0% | 0.00  | 0%  |
| 2003 | MA0730000 | PA TRÊS PALMEIRAS           | 2.06  | 2.01  | 98%  | 0.04  | 2%  | 0.00 | 0%  | 0%  | 0.04  | 2%  | 0.00  | 0%  | 0% | 0.04  | 2%  |
| 2003 | MB0364000 | PA POUSO ALEGRE             | 11.34 | 4.24  | 37%  | 7.10  | 63% | 0.25 | 4%  | 2%  | 6.85  | 60% | 3.86  | 56% | 7% | 2.99  | 26% |
| 2003 | MB0365000 | PA SANTA RITA               | 9.51  | 7.64  | 80%  | 1.87  | 20% | 0.26 | 14% | 7%  | 1.61  | 17% | 0.98  | 61% | 8% | 0.64  | 7%  |
| 2003 | MB0366000 | PA POUSO BONITO             | 14.17 | 5.69  | 40%  | 8.49  | 60% | 0.99 | 12% | 6%  | 7.50  | 53% | 2.06  | 28% | 3% | 5.44  | 38% |
| 2003 | MB0367000 | PA BOA SORTE II             | 9.03  | 4.68  | 52%  | 4.35  | 48% | 0.59 | 14% | 7%  | 3.76  | 42% | 0.45  | 12% | 1% | 3.31  | 37% |
| 2003 | MB0368000 | PA SANTA MARTA              | 12.16 | 6.64  | 55%  | 5.52  | 45% | 0.21 | 4%  | 2%  | 5.31  | 44% | 2.14  | 40% | 5% | 3.17  | 26% |
| 2003 | MB0369000 | PA 8 DE MARÇO               | 15.23 | 4.62  | 30%  | 10.61 | 70% | 0.14 | 1%  | 1%  | 10.48 | 69% | 0.64  | 6%  | 1% | 9.84  | 65% |
| 2003 | MB0370000 | PA NOSSA SENHORA<br>DA GUIA | 22.46 | 11.69 | 52%  | 10.78 | 48% | 1.13 | 10% | 5%  | 9.65  | 43% | 5.76  | 60% | 7% | 3.89  | 17% |
| 2003 | MB0371000 | PA VALE DO<br>ARATAU        | 20.09 | 7.19  | 36%  | 12.90 | 64% | 1.70 | 13% | 7%  | 11.20 | 56% | 4.62  | 41% | 5% | 6.58  | 33% |
| 2003 | MB0372000 | PA NOVA UNIÃO               | 13.97 | 3.97  | 28%  | 10.00 | 72% | 0.90 | 9%  | 5%  | 9.10  | 65% | 2.51  | 28% | 3% | 6.59  | 47% |
| 2003 | MB0373000 | PA COCALÂNDIA II            | 16.47 | 3.82  | 23%  | 12.65 | 77% | 1.03 | 8%  | 4%  | 11.62 | 71% | 6.06  | 52% | 7% | 5.56  | 34% |
| 2003 | MB0374000 | PA PARAUNA                  | 19.79 | 2.40  | 12%  | 17.39 | 88% | 0.94 | 5%  | 3%  | 16.45 | 83% | 4.58  | 28% | 3% | 11.86 | 60% |
| 2003 | MB0375000 | PA REUNIDAS                 | 43.13 | 7.55  | 18%  | 35.58 | 82% | 2.43 | 7%  | 3%  | 33.15 | 77% | 14.88 | 45% | 6% | 18.27 | 42% |
| 2003 | MB0376000 | PA PALMEIRA<br>JUSSARA      | 9.62  | 6.60  | 69%  | 3.02  | 31% | 1.06 | 35% | 18% | 1.96  | 20% | 0.79  | 40% | 5% | 1.17  | 12% |
| 2003 | MB0377000 | PA CONSPTEL                 | 10.49 | 3.96  | 38%  | 6.54  | 62% | 3.42 | 52% | 26% | 3.12  | 30% | 0.70  | 23% | 3% | 2.42  | 23% |
| 2003 | MB0378000 | PA JOÃO LANARI DO<br>VAL    | 46.66 | 36.82 | 79%  | 9.84  | 21% | 1.75 | 18% | 9%  | 8.09  | 17% | 1.29  | 16% | 2% | 6.80  | 15% |
| 2003 | MB0379000 | PA CABANOS                  | 29.10 | 26.61 | 91%  | 2.49  | 9%  | 0.18 | 7%  | 4%  | 2.30  | 8%  | 0.55  | 24% | 3% | 1.76  | 6%  |
| 2003 | MB0380000 | PA BELO VALE                | 12.96 | 8.66  | 67%  | 4.30  | 33% | 2.13 | 50% | 25% | 2.17  | 17% | 0.59  | 27% | 3% | 1.57  | 12% |
| 2003 | MB0381000 | PA CASTANHAL<br>ALMESCÃO    | 46.06 | 24.88 | 54%  | 21.17 | 46% | 6.74 | 32% | 16% | 14.44 | 31% | 7.44  | 52% | 6% | 7.00  | 15% |
| 2003 | MB0384000 | PA MATA AZUL II             | 20.98 | 14.06 | 67%  | 6.93  | 33% | 4.14 | 60% | 30% | 2.79  | 13% | 1.46  | 52% | 7% | 1.33  | 6%  |
| 2003 | MB0385000 | PA IRMÃ DULCE               | 43.58 | 37.72 | 87%  | 5.86  | 13% | 2.68 | 46% | 23% | 3.18  | 7%  | 1.42  | 45% | 6% | 1.76  | 4%  |

|      |           |                                |        |       |      |        |      |       |     |     |        |      |       |     |    |       |     |
|------|-----------|--------------------------------|--------|-------|------|--------|------|-------|-----|-----|--------|------|-------|-----|----|-------|-----|
| 2003 | MB0387000 | PA AQUARIUS<br>CRUZEIRO DO SUL | 40.61  | 13.36 | 33%  | 27.25  | 67%  | 3.28  | 12% | 6%  | 23.97  | 59%  | 10.57 | 44% | 6% | 13.41 | 33% |
| 2003 | MB0388000 | PA BELO HORIZONTE<br>II        | 23.84  | 17.77 | 75%  | 6.08   | 25%  | 0.29  | 5%  | 2%  | 5.79   | 24%  | 0.49  | 9%  | 1% | 5.30  | 22% |
| 2003 | MB0389000 | PA PEDRA DE<br>AMOLAR          | 7.55   | 5.48  | 73%  | 2.07   | 27%  | 0.76  | 37% | 18% | 1.31   | 17%  | 0.79  | 61% | 8% | 0.52  | 7%  |
| 2003 | MB0390000 | PA ZUMBI DOS<br>PALMARES       | 37.77  | 11.25 | 30%  | 26.51  | 70%  | 1.77  | 7%  | 3%  | 24.75  | 66%  | 7.38  | 30% | 4% | 17.37 | 46% |
| 2003 | MB0391000 | PA SOL NASCENTE                | 12.14  | 8.97  | 74%  | 3.17   | 26%  | 1.64  | 52% | 26% | 1.53   | 13%  | 1.13  | 74% | 9% | 0.39  | 3%  |
| 2003 | MB0392000 | PA GABRIEL<br>PIMENTA          | 31.61  | 24.24 | 77%  | 7.37   | 23%  | 0.31  | 4%  | 2%  | 7.06   | 22%  | 1.07  | 15% | 2% | 5.99  | 19% |
| 2003 | MB0394000 | PA JOÃO VAZ                    | 26.48  | 24.72 | 93%  | 1.77   | 7%   | 0.12  | 7%  | 3%  | 1.64   | 6%   | 0.26  | 16% | 2% | 1.38  | 5%  |
| 2003 | MB0395000 | PA LIBERDADE                   | 56.08  | 37.26 | 66%  | 18.83  | 34%  | 6.50  | 35% | 17% | 12.33  | 22%  | 4.64  | 38% | 5% | 7.69  | 14% |
| 2003 | MB0396000 | PA BOM JESUS                   | 15.22  | 11.35 | 75%  | 3.88   | 25%  | 2.04  | 53% | 26% | 1.84   | 12%  | 1.07  | 58% | 7% | 0.77  | 5%  |
| 2003 | MB0397000 | PA SANTA LUCIA                 | 12.52  | 8.80  | 70%  | 3.72   | 30%  | 1.58  | 43% | 21% | 2.13   | 17%  | 1.34  | 63% | 8% | 0.79  | 6%  |
| 2003 | MB0398000 | PA ESTRELA DALVA               | 27.48  | 7.40  | 27%  | 20.08  | 73%  | 0.24  | 1%  | 1%  | 19.84  | 72%  | 7.25  | 37% | 5% | 12.59 | 46% |
| 2003 | MT0640000 | PA BELMONTE                    | 12.76  | 12.76 | 100% | 0.00   | 0%   | 0.00  |     |     | 0.00   | 0%   | 0.00  |     | 0% | 0.00  | 0%  |
| 2003 | MT0641000 | PA VALE DO ARINOS              | 205.22 | 52.11 | 25%  | 153.11 | 75%  | 29.22 | 19% | 10% | 123.89 | 60%  | 58.83 | 47% | 6% | 65.06 | 32% |
| 2003 | MT0668000 | PA KATIRA                      | 0.83   | 0.00  | 0%   | 0.83   | 100% | 0.00  | 0%  | 0%  | 0.83   | 100% | 0.02  | 3%  | 0% | 0.80  | 97% |
| 2003 | PA0258000 | PA RIO DAS CRUZES              | 39.04  | 16.17 | 41%  | 22.87  | 59%  | 8.71  | 38% | 19% | 14.16  | 36%  | 8.87  | 63% | 8% | 5.29  | 14% |
| 2003 | PA0259000 | PA ESPERANÇA                   | 55.94  | 31.90 | 57%  | 24.05  | 43%  | 5.92  | 25% | 12% | 18.13  | 32%  | 4.57  | 25% | 3% | 13.56 | 24% |
| 2003 | PA0267000 | PA PIRAMIDE                    | 2.40   | 1.10  | 46%  | 1.30   | 54%  | 0.59  | 45% | 23% | 0.71   | 30%  | 0.15  | 22% | 3% | 0.55  | 23% |
| 2003 | PA0268000 | PA BACABAL                     | 22.99  | 14.83 | 65%  | 8.15   | 35%  | 3.33  | 41% | 20% | 4.83   | 21%  | 2.20  | 46% | 6% | 2.62  | 11% |
| 2003 | PA0269000 | PA PROGRESSO                   | 37.28  | 15.51 | 42%  | 21.77  | 58%  | 5.30  | 24% | 12% | 16.47  | 44%  | 7.31  | 44% | 6% | 9.16  | 25% |
| 2003 | PA0270000 | PA NOVA SANTA<br>MARIA         | 9.03   | 5.73  | 63%  | 3.30   | 37%  | 1.54  | 47% | 23% | 1.76   | 20%  | 0.10  | 6%  | 1% | 1.67  | 18% |
| 2003 | PA0271000 | PA TAPERUSSU                   | 41.64  | 28.25 | 68%  | 13.39  | 32%  | 2.91  | 22% | 11% | 10.48  | 25%  | 2.01  | 19% | 2% | 8.47  | 20% |

|      |           |                             |         |       |      |          |      |       |     |     |          |      |       |     |    |          |      |
|------|-----------|-----------------------------|---------|-------|------|----------|------|-------|-----|-----|----------|------|-------|-----|----|----------|------|
| 2003 | PA0272000 | PA VALE DO MOJU             | 202.85  | 53.79 | 27%  | 149.05   | 73%  | 13.27 | 9%  | 4%  | 135.78   | 67%  | 58.17 | 43% | 5% | 77.61    | 38%  |
| 2003 | RR0039000 | PA TATAJUBA                 | 227.85  | 2.60  | 1%   | 225.24   | 99%  | 1.84  | 1%  | 0%  | 223.41   | 98%  | 15.67 | 7%  | 1% | 207.73   | 91%  |
| 2003 | RR0040000 | PA AJARANI                  | 1243.14 | 11.51 | 1%   | 1,231.63 | 99%  | 2.58  | 0%  | 0%  | 1,229.05 | 99%  | 59.73 | 5%  | 1% | 1,169.31 | 94%  |
| 2003 | AM0049000 | PAE FLORA<br>AGRÍCOLA       | 28.09   | 17.12 | 61%  | 10.97    | 39%  | 0.13  | 1%  | 1%  | 10.84    | 39%  | 1.05  | 10% | 1% | 9.79     | 35%  |
| 2003 | RO0130000 | PDS CERNAMBI                | 148.21  | 4.55  | 3%   | 143.66   | 97%  | 27.56 | 19% | 10% | 116.10   | 78%  | 41.33 | 36% | 4% | 74.77    | 50%  |
| 2003 | RO0156000 | PDS PORTO SEGURO<br>PE POLO | 14.64   | 2.08  | 14%  | 12.56    | 86%  | 1.68  | 13% | 7%  | 10.88    | 74%  | 1.06  | 10% | 1% | 9.81     | 67%  |
| 2004 | AC0088000 | AGROFLORESTAL<br>FEIJÓ      | 2.34    | 2.34  | 100% | 0.00     | 0%   | 0.00  |     |     | 0.00     | 0%   | 0.00  |     | 0% | 0.00     | 0%   |
| 2004 | AC0099000 | PAF PROVIDÊNCIA<br>CAPITAL  | 323.06  | 19.66 | 6%   | 303.40   | 94%  | 1.79  | 1%  | 1%  | 301.62   | 93%  | 16.26 | 5%  | 1% | 285.36   | 88%  |
| 2004 | AC0101000 | PA ITAMARATY                | 88.06   | 38.93 | 44%  | 49.13    | 56%  | 3.85  | 8%  | 8%  | 45.28    | 51%  | 9.99  | 22% | 3% | 35.29    | 40%  |
| 2004 | AC0102000 | PAF HAVAI                   | 296.82  | 0.91  | 0%   | 295.91   | 100% | 0.00  | 0%  | 0%  | 295.91   | 100% | 0.11  | 0%  | 0% | 295.79   | 100% |
| 2004 | AC0103000 | PDS JAMIL<br>JEREISSATI     | 448.02  | 27.71 | 6%   | 420.31   | 94%  | 1.26  | 0%  | 0%  | 419.05   | 94%  | 13.17 | 3%  | 0% | 405.88   | 91%  |
| 2004 | AC0104000 | PA PORTO LUIZ II            | 19.74   | 1.09  | 6%   | 18.64    | 94%  | 0.02  | 0%  | 0%  | 18.62    | 94%  | 1.08  | 6%  | 1% | 17.54    | 89%  |
| 2004 | AC0105000 | PDS PORTO LUIZ I            | 99.06   | 7.57  | 8%   | 91.50    | 92%  | 2.86  | 3%  | 3%  | 88.63    | 89%  | 16.62 | 19% | 2% | 72.01    | 73%  |
| 2004 | AC0106000 | PA FORTALEZA                | 10.01   | 2.45  | 24%  | 7.56     | 76%  | 0.49  | 7%  | 7%  | 7.06     | 71%  | 2.06  | 29% | 4% | 5.01     | 50%  |
| 2004 | AC0107000 | PA PARAGUASSU               | 37.82   | 29.15 | 77%  | 8.67     | 23%  | 1.79  | 21% | 21% | 6.88     | 18%  | 1.44  | 21% | 3% | 5.44     | 14%  |
| 2004 | AC0108000 | PA UIRAPURU                 | 19.14   | 4.22  | 22%  | 14.92    | 78%  | 0.68  | 5%  | 5%  | 14.24    | 74%  | 3.99  | 28% | 4% | 10.24    | 54%  |
| 2004 | AM0050000 | PAE BOTOS                   | 983.50  | 7.37  | 1%   | 976.13   | 99%  | 0.00  | 0%  | 0%  | 976.13   | 99%  | 0.33  | 0%  | 0% | 975.80   | 99%  |
| 2004 | AM0051000 | PAE JENIPAPOS               | 385.68  | 13.51 | 4%   | 372.17   | 96%  | 0.32  | 0%  | 0%  | 371.85   | 96%  | 0.57  | 0%  | 0% | 371.28   | 96%  |
| 2004 | AM0054000 | PAE CASTANHO                | 855.81  | 21.34 | 2%   | 834.47   | 98%  | 0.06  | 0%  | 0%  | 834.41   | 97%  | 0.99  | 0%  | 0% | 833.43   | 97%  |
| 2004 | AM0056000 | PAE CANAÃ                   | 1268.68 | 2.52  | 0%   | 1,266.16 | 100% | 0.94  | 0%  | 0%  | 1,265.23 | 100% | 4.09  | 0%  | 0% | 1,261.13 | 99%  |
| 2004 | AM0057000 | PAE ABACAXIS                | 6771.72 | 22.99 | 0%   | 6,748.73 | 100% | 0.48  | 0%  | 0%  | 6,748.25 | 100% | 1.73  | 0%  | 0% | 6,746.53 | 100% |
| 2004 | AM0058000 | PAE CURUPIRA                | 1439.02 | 164.7 | 11%  | 1,274.30 | 89%  | 0.86  | 0%  | 0%  | 1,273.44 | 88%  | 21.64 | 2%  | 0% | 1,251.80 | 87%  |

|      |           |                                              |        |        |      |       |      |      |     |     |       |     |      |     |    |       |     |
|------|-----------|----------------------------------------------|--------|--------|------|-------|------|------|-----|-----|-------|-----|------|-----|----|-------|-----|
|      |           |                                              |        | 2      |      |       |      |      |     |     |       |     |      |     |    |       |     |
| 2004 | MA0842000 | PA SÃO FRANCISCO I                           | 26.76  | 6.22   | 23%  | 20.54 | 77%  | 0.82 | 4%  | 4%  | 19.71 | 74% | 4.49 | 23% | 3% | 15.22 | 57% |
| 2004 | MA0859000 | PA SÃO JOÃO DO ROSÁRIO                       | 36.77  | 0.14   | 0%   | 36.63 | 100% | 0.38 | 1%  | 1%  | 36.25 | 99% | 6.21 | 17% | 2% | 30.04 | 82% |
| 2004 | MA0860000 | PA PRESIDENTE LULA                           | 25.72  | 11.01  | 43%  | 14.71 | 57%  | 1.79 | 12% | 12% | 12.92 | 50% | 5.03 | 39% | 5% | 7.89  | 31% |
| 2004 | MA0864000 | PA CAMPO VERDE / COLONE                      | 3.01   | 3.01   | 100% | 0.00  | 0%   | 0.00 |     |     | 0.00  | 0%  | 0.00 |     | 0% | 0.00  | 0%  |
| 2004 | MA0865000 | PA NOVA CANAÃ / COLONE                       | 2.18   | 2.18   | 100% | 0.00  | 0%   | 0.00 |     |     | 0.00  | 0%  | 0.00 |     | 0% | 0.00  | 0%  |
| 2004 | MA0866000 | PA SANTO ANTONIO III                         | 2.55   | 2.55   | 100% | 0.00  | 0%   | 0.00 |     |     | 0.00  | 0%  | 0.00 |     | 0% | 0.00  | 0%  |
| 2004 | MA0869000 | PA ALTO TURI III                             | 231.76 | 229.26 | 99%  | 2.49  | 1%   | 0.71 | 28% | 28% | 1.79  | 1%  | 0.48 | 27% | 3% | 1.30  | 1%  |
| 2004 | MA0870000 | PA ALTO TURI II                              | 198.33 | 196.49 | 99%  | 1.84  | 1%   | 0.73 | 40% | 40% | 1.11  | 1%  | 0.22 | 20% | 2% | 0.89  | 0%  |
| 2004 | MA0871000 | PA CENTRO DO ELIAS / BREJO DO LUCAS / COLONE | 93.62  | 92.40  | 99%  | 1.22  | 1%   | 0.34 | 27% | 27% | 0.89  | 1%  | 0.00 | 0%  | 0% | 0.89  | 1%  |
| 2004 | MA0872000 | PA QUADRA ÁGUA AZUL / COLONE                 | 51.77  | 40.66  | 79%  | 11.10 | 21%  | 0.06 | 1%  | 1%  | 11.04 | 21% | 4.41 | 40% | 5% | 6.63  | 13% |
| 2004 | MA0873000 | PA QUADRA 21 DE ABRIL / COLONE               | 59.57  | 58.27  | 98%  | 1.30  | 2%   | 0.00 | 0%  | 0%  | 1.30  | 2%  | 0.25 | 20% | 2% | 1.04  | 2%  |
| 2004 | MA0874000 | PA UNIÃO/SANTO ANTONIO / COLONE              | 67.65  | 61.42  | 91%  | 6.23  | 9%   | 0.00 | 0%  | 0%  | 6.23  | 9%  | 4.31 | 69% | 9% | 1.93  | 3%  |
| 2004 | MA0876000 | PA FORTAL/COLONE                             | 2.70   | 2.70   | 100% | 0.00  | 0%   | 0.00 |     |     | 0.00  | 0%  | 0.00 |     | 0% | 0.00  | 0%  |
| 2004 | MA0877000 | PA TERRA                                     | 7.38   | 7.38   | 100% | 0.00  | 0%   | 0.00 |     |     | 0.00  | 0%  | 0.00 |     | 0% | 0.00  | 0%  |

|      |           |                                        |       |       |      |      |     |      |    |    |      |     |      |     |      |      |     |
|------|-----------|----------------------------------------|-------|-------|------|------|-----|------|----|----|------|-----|------|-----|------|------|-----|
|      |           | PROMETIDA /<br>COLONE                  |       |       |      |      |     |      |    |    |      |     |      |     |      |      |     |
| 2004 | MA0878000 | PA SÃO LUIS /<br>COLONE                | 1.48  | 1.48  | 100% | 0.00 | 0%  | 0.00 |    |    | 0.00 | 0%  | 0.00 | 0%  | 0.00 | 0%   |     |
|      |           | PA CENTRO DO<br>PEDRO / BOM JESUS      |       |       |      |      |     |      |    |    |      |     |      |     |      |      |     |
| 2004 | MA0879000 | DA MATA/COLONE                         | 41.40 | 41.40 | 100% | 0.00 | 0%  | 0.00 |    |    | 0.00 | 0%  | 0.00 | 0%  | 0.00 | 0%   |     |
|      |           | PA VILA<br>ESPERANÇA/COLONE            |       |       |      |      |     |      |    |    |      |     |      |     |      |      |     |
| 2004 | MA0880000 |                                        | 0.95  | 0.95  | 100% | 0.00 | 0%  | 0.00 |    |    | 0.00 | 0%  | 0.00 | 0%  | 0.00 | 0%   |     |
|      |           | PA QUADRA BETEL /<br>COLONE            |       |       |      |      |     |      |    |    |      |     |      |     |      |      |     |
| 2004 | MA0881000 |                                        | 36.31 | 35.82 | 99%  | 0.50 | 1%  | 0.00 | 0% | 0% | 0.50 | 1%  | 0.32 | 65% | 8%   | 0.18 | 0%  |
|      |           | PA QUADRA<br>CANAÃ/COLONE              |       |       |      |      |     |      |    |    |      |     |      |     |      |      |     |
| 2004 | MA0882000 |                                        | 27.04 | 27.04 | 100% | 0.00 | 0%  | 0.00 |    |    | 0.00 | 0%  | 0.00 | 0%  | 0.00 | 0%   |     |
|      |           | PA QUADRA<br>JERICÓ/COLONE             |       |       |      |      |     |      |    |    |      |     |      |     |      |      |     |
| 2004 | MA0883000 |                                        | 30.68 | 30.68 | 100% | 0.00 | 0%  | 0.00 |    |    | 0.00 | 0%  | 0.00 | 0%  | 0.00 | 0%   |     |
|      |           | PA QUADRA BELÉM /<br>COLONE            |       |       |      |      |     |      |    |    |      |     |      |     |      |      |     |
| 2004 | MA0884000 |                                        | 26.67 | 26.67 | 100% | 0.00 | 0%  | 0.00 |    |    | 0.00 | 0%  | 0.00 | 0%  | 0.00 | 0%   |     |
|      |           | PA SANTA CLARA /<br>COLONE             |       |       |      |      |     |      |    |    |      |     |      |     |      |      |     |
| 2004 | MA0885000 |                                        | 2.10  | 2.10  | 100% | 0.00 | 0%  | 0.00 |    |    | 0.00 | 0%  | 0.00 | 0%  | 0.00 | 0%   |     |
|      |           | PA ALTO ALEGRE /<br>COLONE             |       |       |      |      |     |      |    |    |      |     |      |     |      |      |     |
| 2004 | MA0886000 |                                        | 5.76  | 5.76  | 100% | 0.00 | 0%  | 0.00 |    |    | 0.00 | 0%  | 0.00 | 0%  | 0.00 | 0%   |     |
|      |           | PA QUADRA BOA<br>ESPERANÇA /<br>COLONE |       |       |      |      |     |      |    |    |      |     |      |     |      |      |     |
| 2004 | MA0887000 |                                        | 36.28 | 36.28 | 100% | 0.00 | 0%  | 0.00 |    |    | 0.00 | 0%  | 0.00 | 0%  | 0.00 | 0%   |     |
|      |           | PA QUADRA SÃO<br>FRANCISCO /<br>COLONE |       |       |      |      |     |      |    |    |      |     |      |     |      |      |     |
| 2004 | MA0888000 |                                        | 34.16 | 24.27 | 71%  | 9.89 | 29% | 0.13 | 1% | 1% | 9.76 | 29% | 4.05 | 41% | 5%   | 5.71 | 17% |



|      |           |                                               |        |        |      |       |     |      |     |     |       |     |      |      |     |       |     |
|------|-----------|-----------------------------------------------|--------|--------|------|-------|-----|------|-----|-----|-------|-----|------|------|-----|-------|-----|
| 2004 | MA0889000 | PA QUADRA BRASIL / COLONE                     | 40.74  | 40.74  | 100% | 0.01  | 0%  | 0.00 | 0%  | 0%  | 0.01  | 0%  | 0.00 | 0%   | 0%  | 0.01  | 0%  |
| 2004 | MA0890000 | PA QUADRA PEDRO ALVARES CABRAL / COLONE       | 32.13  | 28.64  | 89%  | 3.49  | 11% | 0.11 | 3%  | 3%  | 3.38  | 11% | 0.96 | 28%  | 4%  | 2.42  | 8%  |
| 2004 | MA0891000 | PA QUADRA DUQUE DE CAXIAS / COLONE            | 49.63  | 49.59  | 100% | 0.04  | 0%  | 0.00 | 0%  | 0%  | 0.04  | 0%  | 0.04 | 100% | 12% | 0.00  | 0%  |
| 2004 | MA0892000 | PA REDENÇÃO / BELÉM / COLONE                  | 86.28  | 66.15  | 77%  | 20.13 | 23% | 2.74 | 14% | 14% | 17.39 | 20% | 6.68 | 38%  | 5%  | 10.71 | 12% |
| 2004 | MA0893000 | PA QUADRA JERUSALÉM / COLONE                  | 32.78  | 32.78  | 100% | 0.00  | 0%  | 0.00 |     |     | 0.00  | 0%  | 0.00 |      | 0%  | 0.00  | 0%  |
| 2004 | MA0894000 | PA SÃO FRANCISCO / COLONE                     | 1.79   | 1.63   | 91%  | 0.16  | 9%  | 0.00 | 0%  | 0%  | 0.16  | 9%  | 0.15 | 94%  | 12% | 0.01  | 1%  |
| 2004 | MA0896000 | PA MORADA NOVA/CENTRO DOS PINHEIROS / COLONE  | 46.32  | 46.32  | 100% | 0.00  | 0%  | 0.00 |     |     | 0.00  | 0%  | 0.00 |      | 0%  | 0.00  | 0%  |
| 2004 | MA0897000 | PA PEDREIRA II / INGAZAL / COLONE             | 12.72  | 12.72  | 100% | 0.00  | 0%  | 0.00 |     |     | 0.00  | 0%  | 0.00 |      | 0%  | 0.00  | 0%  |
| 2004 | MA0898000 | PA CENTRO DOS MARTINS / AGRICOLÂNDIA / COLONE | 124.39 | 122.42 | 98%  | 1.97  | 2%  | 0.37 | 19% | 19% | 1.60  | 1%  | 0.30 | 19%  | 2%  | 1.30  | 1%  |
| 2004 | MA0901000 | PA QUADRA NOVA / 13 DE JUNHO / COLONE         | 31.33  | 31.33  | 100% | 0.00  | 0%  | 0.00 |     |     | 0.00  | 0%  | 0.00 |      | 0%  | 0.00  | 0%  |
| 2004 | MA0902000 | PA QUADRA                                     | 62.62  | 62.62  | 100% | 0.00  | 0%  | 0.00 |     |     | 0.00  | 0%  | 0.00 |      | 0%  | 0.00  | 0%  |

|      |           |                                                                       |        |            |      |       |     |       |     |     |       |     |       |     |    |       |     |
|------|-----------|-----------------------------------------------------------------------|--------|------------|------|-------|-----|-------|-----|-----|-------|-----|-------|-----|----|-------|-----|
|      |           | BENEDITO MENDES /<br>QUADRA<br>FORTALEZA /<br>COLONE<br>PA QUADRA SÃO |        |            |      |       |     |       |     |     |       |     |       |     |    |       |     |
| 2004 | MA0906000 | RAIMUNDO III /<br>COLONE                                              | 181.56 | 101.8<br>5 | 56%  | 79.71 | 44% | 20.50 | 26% | 26% | 59.21 | 33% | 17.34 | 29% | 4% | 41.87 | 23% |
| 2004 | MA0909000 | PA QUADRA SABIÁ /<br>COLONE                                           | 53.36  | 45.90      | 86%  | 7.47  | 14% | 0.00  | 0%  | 0%  | 7.47  | 14% | 3.76  | 50% | 6% | 3.71  | 7%  |
| 2004 | MA0911000 | PA ITAMATARÉ /<br>COLONE                                              | 231.92 | 159.1<br>5 | 69%  | 72.77 | 31% | 9.47  | 13% | 13% | 63.30 | 27% | 16.83 | 27% | 3% | 46.47 | 20% |
| 2004 | MA0912000 | PA PINDORAMA /<br>ARARIBÓIA /<br>COLONE                               | 305.65 | 267.4<br>7 | 88%  | 38.19 | 12% | 3.73  | 10% | 10% | 34.46 | 11% | 18.34 | 53% | 7% | 16.12 | 5%  |
| 2004 | MA0913000 | PA 15 DE JUNHO /<br>IGARAPÉ AREIA /<br>SÃO JOSE II /<br>COLONE        | 76.40  | 75.41      | 99%  | 0.99  | 1%  | 0.06  | 7%  | 7%  | 0.93  | 1%  | 0.30  | 33% | 4% | 0.62  | 1%  |
| 2004 | MA0914000 | PA FÉ EM DEUS /<br>COLONIAL / COLONE                                  | 150.30 | 150.3<br>0 | 100% | 0.00  | 0%  | 0.00  |     |     | 0.00  | 0%  | 0.00  |     | 0% | 0.00  | 0%  |
| 2004 | MA0915000 | PA JACI / COLONE                                                      | 67.08  | 65.08      | 97%  | 2.00  | 3%  | 0.15  | 7%  | 7%  | 1.85  | 3%  | 0.66  | 35% | 4% | 1.19  | 2%  |
| 2004 | MA0916000 | PA SÃO JOÃO / 16 DE<br>OUTUBRO / COLONE                               | 41.47  | 41.47      | 100% | 0.00  | 0%  | 0.00  |     |     | 0.00  | 0%  | 0.00  |     | 0% | 0.00  | 0%  |
| 2004 | MA0917000 | PA NOVA VIDA /<br>SERPETIARA /<br>COLONE                              | 49.62  | 45.53      | 92%  | 4.08  | 8%  | 0.00  | 0%  | 0%  | 4.08  | 8%  | 0.20  | 5%  | 1% | 3.89  | 8%  |
| 2004 | MA0918000 | PA QUADRA                                                             | 50.11  | 44.20      | 88%  | 5.91  | 12% | 0.00  | 0%  | 0%  | 5.91  | 12% | 3.12  | 53% | 7% | 2.79  | 6%  |

| CASTELO BRANCO /<br>COLONE |           |                          |        |       |     |       |     |       |     |     |       |     |       |     |     |       |     |
|----------------------------|-----------|--------------------------|--------|-------|-----|-------|-----|-------|-----|-----|-------|-----|-------|-----|-----|-------|-----|
| 2004                       | MB0218000 | PA VALE DO<br>MUCURA     | 108.04 | 80.99 | 75% | 27.06 | 25% | 10.60 | 39% | 39% | 16.45 | 15% | 7.41  | 45% | 6%  | 9.04  | 8%  |
| 2004                       | MB0401000 | PA GROTÃO DO<br>SEVERINO | 7.63   | 6.81  | 89% | 0.82  | 11% | 0.30  | 37% | 37% | 0.52  | 7%  | 0.35  | 68% | 9%  | 0.16  | 2%  |
| 2004                       | MB0402000 | PA TALISMÃ               | 9.87   | 2.73  | 28% | 7.13  | 72% | 0.00  | 0%  | 0%  | 7.13  | 72% | 3.96  | 55% | 7%  | 3.18  | 32% |
| 2004                       | MB0404000 | PA CANUDOS               | 27.42  | 21.41 | 78% | 6.00  | 22% | 0.50  | 8%  | 8%  | 5.50  | 20% | 3.76  | 68% | 9%  | 1.75  | 6%  |
| 2004                       | MB0405000 | PA TARUMÃ                | 44.05  | 37.16 | 84% | 6.89  | 16% | 0.00  | 0%  | 0%  | 6.89  | 16% | 3.08  | 45% | 6%  | 3.81  | 9%  |
| 2004                       | MB0406000 | PA ESPERANÇA             | 22.64  | 13.44 | 59% | 9.20  | 41% | 0.59  | 6%  | 6%  | 8.61  | 38% | 6.25  | 73% | 9%  | 2.35  | 10% |
| 2004                       | MB0407000 | PA LIMEIRA               | 13.43  | 9.79  | 73% | 3.64  | 27% | 0.00  | 0%  | 0%  | 3.64  | 27% | 2.27  | 62% | 8%  | 1.38  | 10% |
| 2004                       | MB0408000 | PA ANTARES               | 70.32  | 39.15 | 56% | 31.18 | 44% | 1.67  | 5%  | 5%  | 29.51 | 42% | 14.96 | 51% | 6%  | 14.55 | 21% |
| 2004                       | MB0409000 | PA PARAGOMINAS           | 16.00  | 15.32 | 96% | 0.69  | 4%  | 0.09  | 13% | 13% | 0.60  | 4%  | 0.13  | 22% | 3%  | 0.47  | 3%  |
| 2004                       | MB0411000 | PA CARUMBÉ               | 28.52  | 21.35 | 75% | 7.17  | 25% | 2.67  | 37% | 37% | 4.50  | 16% | 3.14  | 70% | 9%  | 1.36  | 5%  |
| 2004                       | MB0412000 | PA UNIÃO DO<br>ANGICO    | 28.03  | 13.80 | 49% | 14.23 | 51% | 2.85  | 20% | 20% | 11.38 | 41% | 9.55  | 84% | 10% | 1.83  | 7%  |
| 2004                       | MB0413000 | PA MUTUÃ                 | 35.99  | 21.37 | 59% | 14.63 | 41% | 5.72  | 39% | 39% | 8.91  | 25% | 5.59  | 63% | 8%  | 3.31  | 9%  |
| 2004                       | MB0417000 | PA RAINHA DA PAZ         | 39.23  | 25.79 | 66% | 13.44 | 34% | 0.72  | 5%  | 5%  | 12.71 | 32% | 3.60  | 28% | 4%  | 9.11  | 23% |
| 2004                       | MB0418000 | PA GAVIÃO                | 104.74 | 65.81 | 63% | 38.94 | 37% | 5.27  | 14% | 14% | 33.66 | 32% | 9.52  | 28% | 4%  | 24.14 | 23% |
| 2004                       | MB0419000 | PA MANTENHA              | 11.71  | 8.70  | 74% | 3.01  | 26% | 0.69  | 23% | 23% | 2.32  | 20% | 1.30  | 56% | 7%  | 1.02  | 9%  |
| 2004                       | MB0420000 | PA CACHOEIRA<br>PRETA II | 71.25  | 40.49 | 57% | 30.76 | 43% | 0.00  | 0%  | 0%  | 30.76 | 43% | 13.01 | 42% | 5%  | 17.75 | 25% |
| 2004                       | MT0719000 | PA FLOR DA MATA          | 4.30   | 0.17  | 4%  | 4.13  | 96% | 0.04  | 1%  | 1%  | 4.09  | 95% | 0.56  | 14% | 2%  | 3.53  | 82% |
| 2004                       | PA0255000 | PA RIO<br>ACAMPAMENTO    | 64.79  | 46.79 | 72% | 18.01 | 28% | 3.33  | 19% | 19% | 14.67 | 23% | 8.89  | 61% | 8%  | 5.78  | 9%  |
| 2004                       | PA0273000 | PA INÁCIA                | 26.58  | 16.21 | 61% | 10.37 | 39% | 0.00  | 0%  | 0%  | 10.37 | 39% | 5.85  | 56% | 7%  | 4.52  | 17% |
| 2004                       | PA0274000 | PA JARARACA              | 13.81  | 8.13  | 59% | 5.67  | 41% | 0.00  | 0%  | 0%  | 5.67  | 41% | 3.29  | 58% | 7%  | 2.39  | 17% |

|      |           |                           |        |       |      |        |      |      |     |     |        |      |       |     |    |        |      |
|------|-----------|---------------------------|--------|-------|------|--------|------|------|-----|-----|--------|------|-------|-----|----|--------|------|
| 2004 | PA0275000 | PAE SÃO JOÃO<br>BATISTA   | 3.91   | 0.00  | 0%   | 3.91   | 100% | 0.00 | 0%  | 0%  | 3.91   | 100% | 0.00  | 0%  | 0% | 3.91   | 100% |
|      |           | PAE NOSSA                 |        |       |      |        |      |      |     |     |        |      |       |     |    |        |      |
| 2004 | PA0276000 | SENHORA DO<br>LIVRAMENTO  | 1.81   | 0.00  | 0%   | 1.81   | 100% | 0.00 | 0%  | 0%  | 1.81   | 100% | 0.00  | 0%  | 0% | 1.81   | 100% |
| 2004 | PA0278000 | PCA ELIZABETE<br>TEIXEIRA | 0.72   | 0.28  | 39%  | 0.44   | 61%  | 0.00 | 0%  | 0%  | 0.44   | 61%  | 0.00  | 0%  | 0% | 0.44   | 61%  |
| 2004 | RO0157000 | PA MIGRANTES              | 20.24  | 15.90 | 79%  | 4.34   | 21%  | 0.32 | 7%  | 7%  | 4.02   | 20%  | 0.27  | 7%  | 1% | 3.75   | 19%  |
| 2004 | RO0158000 | PA ALTAMIRA               | 99.32  | 58.04 | 58%  | 41.28  | 42%  | 6.03 | 15% | 15% | 35.25  | 35%  | 9.82  | 28% | 3% | 25.42  | 26%  |
| 2004 | RO0159000 | PA SANTA ELISA            | 68.40  | 49.24 | 72%  | 19.16  | 28%  | 2.07 | 11% | 11% | 17.09  | 25%  | 8.62  | 50% | 6% | 8.47   | 12%  |
| 2004 | SM0067000 | PDS ANAPU I               | 240.14 | 19.40 | 8%   | 220.73 | 92%  | 6.48 | 3%  | 3%  | 214.25 | 89%  | 28.73 | 13% | 2% | 185.52 | 77%  |
| 2004 | SM0069000 | PDS ANAPU III             | 242.57 | 1.98  | 1%   | 240.59 | 99%  | 0.11 | 0%  | 0%  | 240.47 | 99%  | 0.00  | 0%  | 0% | 240.47 | 99%  |
| 2004 | SM0070000 | PDS ANAPU IV              | 61.40  | 1.77  | 3%   | 59.63  | 97%  | 0.20 | 0%  | 0%  | 59.43  | 97%  | 4.01  | 7%  | 1% | 55.42  | 90%  |
| 2004 | SM0073000 | PDS CUPARI                | 299.99 | 0.58  | 0%   | 299.41 | 100% | 0.00 | 0%  | 0%  | 299.41 | 100% | 5.95  | 2%  | 0% | 293.46 | 98%  |
| 2004 | SM0074000 | PDS DIVINÓPOLIS           | 294.86 | 5.15  | 2%   | 289.72 | 98%  | 0.18 | 0%  | 0%  | 289.54 | 98%  | 18.52 | 6%  | 1% | 271.02 | 92%  |
| 2004 | SM0075000 | PDS NOVO MUNDO            | 299.94 | 4.42  | 1%   | 295.53 | 99%  | 0.10 | 0%  | 0%  | 295.42 | 98%  | 3.26  | 1%  | 0% | 292.16 | 97%  |
| 2004 | TO0317000 | PA FORTALEZA              | 3.34   | 3.34  | 100% | 0.00   | 0%   | 0.00 |     |     | 0.00   | 0%   | 0.00  |     | 0% | 0.00   | 0%   |
| 2005 | AC0100000 | PA ARCO-IRIS              | 14.04  | 4.24  | 30%  | 9.79   | 70%  |      |     |     | 9.79   | 70%  | 2.20  | 22% | 3% | 7.60   | 54%  |
| 2005 | AC0109000 | PA JOÃO ADEMIR            | 2.58   | 0.42  | 16%  | 2.15   | 84%  |      |     |     | 2.15   | 84%  | 0.45  | 21% | 3% | 1.71   | 66%  |
| 2005 | AC0110000 | PA CASTELO                | 4.76   | 4.15  | 87%  | 0.62   | 13%  |      |     |     | 0.62   | 13%  | 0.14  | 23% | 3% | 0.47   | 10%  |
| 2005 | AC0116000 | PA PETROLINA              | 32.24  | 25.11 | 78%  | 7.13   | 22%  |      |     |     | 7.13   | 22%  | 0.95  | 13% | 2% | 6.18   | 19%  |
| 2005 | AC0118000 | PA JOÃO BATISTA           | 39.24  | 9.89  | 25%  | 29.35  | 75%  |      |     |     | 29.35  | 75%  | 4.88  | 17% | 2% | 24.47  | 62%  |
| 2005 | AC0121000 | PA ALBERTO<br>SANTIAGO    | 21.69  | 11.10 | 51%  | 10.59  | 49%  |      |     |     | 10.59  | 49%  | 1.56  | 15% | 2% | 9.04   | 42%  |
| 2005 | AC0117000 | PAF VALENCIA              | 213.18 | 14.92 | 7%   | 198.26 | 93%  |      |     |     | 198.26 | 93%  | 9.17  | 5%  | 1% | 189.10 | 89%  |
| 2005 | AM0061000 | PA ESPIGÃO DO<br>ARARA    | 48.21  | 5.71  | 12%  | 42.50  | 88%  |      |     |     | 42.50  | 88%  | 2.56  | 6%  | 1% | 39.94  | 83%  |

|      |           |                                                 |        |            |      |       |     |       |     |      |     |    |       |     |
|------|-----------|-------------------------------------------------|--------|------------|------|-------|-----|-------|-----|------|-----|----|-------|-----|
| 2005 | AM0062000 | PA MANAQUIRI I -<br>GLEBA 06                    | 39.97  | 5.94       | 15%  | 34.04 | 85% | 34.04 | 85% | 0.82 | 2%  | 0% | 33.21 | 83% |
| 2005 | AM0063000 | PA MANAQUIRI II -<br>GLEBA 07                   | 67.86  | 10.15      | 15%  | 57.71 | 85% | 57.71 | 85% | 0.58 | 1%  | 0% | 57.12 | 84% |
| 2005 | AP0038000 | PA FERREIRINHA                                  | 54.58  | 7.95       | 15%  | 46.63 | 85% | 46.63 | 85% | 1.24 | 3%  | 0% | 45.40 | 83% |
| 2005 | MA0747000 | PA RAIMUNDO<br>PANELADA/SIMASA                  | 69.95  | 44.93      | 64%  | 25.02 | 36% | 25.02 | 36% | 8.52 | 34% | 4% | 16.50 | 24% |
| 2005 | AC0124000 | PAF RECANTO                                     | 90.08  | 1.10       | 1%   | 88.98 | 99% | 88.98 | 99% | 2.04 | 2%  | 0% | 86.93 | 97% |
| 2005 | MA0748000 | PA SÃO JOÃO I                                   | 8.15   | 7.19       | 88%  | 0.96  | 12% | 0.96  | 12% | 0.52 | 54% | 7% | 0.44  | 5%  |
| 2005 | MA0836000 | PA DEUS PROTEJA                                 | 22.71  | 13.37      | 59%  | 9.33  | 41% | 9.33  | 41% | 2.82 | 30% | 4% | 6.52  | 29% |
| 2005 | MA0921000 | PA SANTA TEREZA /<br>COLONE                     | 1.53   | 1.39       | 90%  | 0.15  | 10% | 0.15  | 10% | 0.00 | 1%  | 0% | 0.15  | 10% |
| 2005 | MA0924000 | PA SÃO JUDAS<br>TADEU                           | 7.27   | 7.27       | 100% | 0.01  | 0%  | 0.01  | 0%  | 0.00 | 0%  | 0% | 0.01  | 0%  |
| 2005 | MA0925000 | PA CONCEIÇÃO I                                  | 8.48   | 8.48       | 100% | 0.00  | 0%  | 0.00  | 0%  | 0.00 | 0%  | 0% | 0.00  | 0%  |
| 2005 | MA0926000 | PA SÃO PEDRO /<br>COLONE                        | 3.81   | 3.81       | 100% | 0.00  | 0%  | 0.00  | 0%  | 0.00 | 0%  | 0% | 0.00  | 0%  |
| 2005 | MA0927000 | PA 22 DE SETEMBRO /<br>SANTA TEREZA /<br>COLONE | 265.51 | 265.2<br>4 | 100% | 0.27  | 0%  | 0.27  | 0%  | 0.10 | 38% | 5% | 0.16  | 0%  |
| 2005 | MA0928000 | PA CAFÉ DA MATA /<br>COLONE                     | 29.55  | 29.55      | 100% | 0.00  | 0%  | 0.00  | 0%  | 0.00 | 0%  | 0% | 0.00  | 0%  |
| 2005 | MA0929000 | PA MATA AZUL /<br>COLONE                        | 24.24  | 13.11      | 54%  | 11.14 | 46% | 11.14 | 46% | 4.83 | 43% | 5% | 6.31  | 26% |
| 2005 | MA0931000 | PA GRACILÂNDIA /<br>CIDELÂNDIA /<br>COLONE      | 153.84 | 151.8<br>1 | 99%  | 2.02  | 1%  | 2.02  | 1%  | 0.11 | 6%  | 1% | 1.91  | 1%  |

|      |           |                                    |        |        |      |       |     |       |     |       |      |     |       |     |
|------|-----------|------------------------------------|--------|--------|------|-------|-----|-------|-----|-------|------|-----|-------|-----|
| 2005 | MA0932000 | PA NADIR / SÃO VICENTE / COLONE    | 295.47 | 206.68 | 70%  | 88.79 | 30% | 88.79 | 30% | 25.30 | 28%  | 4%  | 63.49 | 21% |
| 2005 | MA0933000 | PA SÃO FRANCISCO II / COLONE       | 1.48   | 1.48   | 100% | 0.00  | 0%  | 0.00  | 0%  | 0.00  |      | 0%  | 0.00  | 0%  |
| 2005 | MA0934000 | PA FELIZ UNIÃO / COLONE            | 3.24   | 3.24   | 100% | 0.00  | 0%  | 0.00  | 0%  | 0.00  |      | 0%  | 0.00  | 0%  |
| 2005 | MA0935000 | PA NOSSA VITÓRIA / COLONE          | 2.41   | 2.41   | 100% | 0.00  | 0%  | 0.00  | 0%  | 0.00  |      | 0%  | 0.00  | 0%  |
| 2005 | MA0939000 | PA LEELAU /CAJUEIRO/COLONE         | 10.87  | 10.87  | 100% | 0.00  | 0%  | 0.00  | 0%  | 0.00  | 0%   | 0%  | 0.00  | 0%  |
| 2005 | MA0940000 | PA ABAIXADINHO / COLONE            | 16.93  | 10.10  | 60%  | 6.83  | 40% | 6.83  | 40% | 2.35  | 34%  | 4%  | 4.47  | 26% |
| 2005 | MA0941000 | PA UBINZAL / COLONE                | 155.03 | 152.27 | 98%  | 2.76  | 2%  | 2.76  | 2%  | 1.06  | 39%  | 5%  | 1.70  | 1%  |
| 2005 | MA0944000 | PA TATAJUBA / 10 DE ABRIL / COLONE | 41.30  | 41.13  | 100% | 0.17  | 0%  | 0.17  | 0%  | 0.15  | 87%  | 11% | 0.02  | 0%  |
| 2005 | MA0946000 | PA MARACAÇUMÉ / RICOA              | 15.90  | 15.86  | 100% | 0.05  | 0%  | 0.05  | 0%  | 0.05  | 100% | 13% | 0.00  | 0%  |
| 2005 | MA0947000 | PA JUSSARAL DO ANTONIO ROXO        | 8.09   | 8.09   | 100% | 0.00  | 0%  | 0.00  | 0%  | 0.00  |      | 0%  | 0.00  | 0%  |
| 2005 | MA0820000 | PE BOA VISTA III                   | 48.03  | 43.79  | 91%  | 4.25  | 9%  | 4.25  | 9%  | 0.00  | 0%   | 0%  | 4.25  | 9%  |
| 2005 | MA0821000 | PE ENCRUSO                         | 41.94  | 0.42   | 1%   | 41.52 | 99% | 41.52 | 99% | 3.24  | 8%   | 1%  | 38.28 | 91% |
| 2005 | MA0948000 | PA CUBA                            | 7.41   | 2.84   | 38%  | 4.57  | 62% | 4.57  | 62% | 0.82  | 18%  | 2%  | 3.75  | 51% |
| 2005 | MA0969000 | PA FLECHAL                         | 171.84 | 132.92 | 77%  | 38.92 | 23% | 38.92 | 23% | 13.20 | 34%  | 4%  | 25.72 | 15% |
| 2005 | MA0973000 | PA VILA NOVA                       | 19.99  | 1.81   | 9%   | 18.18 | 91% | 18.18 | 91% | 3.16  | 17%  | 2%  | 15.02 | 75% |
| 2005 | MA0974000 | PA NÚCLEO A - I /                  | 96.45  | 96.45  | 100% | 0.00  | 0%  | 0.00  | 0%  | 0.00  |      | 0%  | 0.00  | 0%  |

|      |           |                            |       |       |      |       |      |       |      |       |     |     |       |     |
|------|-----------|----------------------------|-------|-------|------|-------|------|-------|------|-------|-----|-----|-------|-----|
|      |           | COLONE                     |       |       |      |       |      |       |      |       |     |     |       |     |
| 2005 | MA0975000 | PA BOQUEIRÃO I /<br>COLONE | 3.77  | 3.50  | 93%  | 0.26  | 7%   | 0.26  | 7%   | 0.20  | 77% | 10% | 0.06  | 2%  |
|      |           | PA QUADRA                  |       |       |      |       |      |       |      |       |     |     |       |     |
| 2005 | MA0976000 | PIMENTEIRA /<br>COLONE     | 15.48 | 15.48 | 100% | 0.00  | 0%   | 0.00  | 0%   | 0.00  |     | 0%  | 0.00  | 0%  |
|      |           | PA QUADRA 10 DE            |       |       |      |       |      |       |      |       |     |     |       |     |
| 2005 | MA0977000 | JANEIRO / COLONE           | 12.61 | 12.61 | 100% | 0.00  | 0%   | 0.00  | 0%   | 0.00  |     | 0%  | 0.00  | 0%  |
|      |           | PA QUADRA NOVA             |       |       |      |       |      |       |      |       |     |     |       |     |
| 2005 | MA0978000 | PIMENTEIRA /<br>COLONE     | 12.50 | 12.50 | 100% | 0.00  | 0%   | 0.00  | 0%   | 0.00  |     | 0%  | 0.00  | 0%  |
| 2005 | MA0979000 | PA DIBOM I                 | 31.07 | 30.87 | 99%  | 0.19  | 1%   | 0.19  | 1%   | 0.08  | 41% | 5%  | 0.11  | 0%  |
| 2005 | MA0980000 | PA DIBOM II                | 16.02 | 15.50 | 97%  | 0.52  | 3%   | 0.52  | 3%   | 0.12  | 23% | 3%  | 0.40  | 2%  |
| 2005 | MA0981000 | PA BOM JESUS III           | 20.66 | 0.00  | 0%   | 20.66 | 100% | 20.66 | 100% | 3.59  | 17% | 2%  | 17.06 | 83% |
| 2005 | MA0982000 | PA BOCA DA MATA I          | 24.02 | 16.89 | 70%  | 7.12  | 30%  | 7.12  | 30%  | 3.76  | 53% | 7%  | 3.37  | 14% |
|      |           | PA PADRE JOSIMO            |       |       |      |       |      |       |      |       |     |     |       |     |
| 2005 | MB0422000 | TAVARES II                 | 10.20 | 5.56  | 55%  | 4.64  | 45%  | 4.64  | 45%  | 2.89  | 62% | 8%  | 1.75  | 17% |
|      |           | PA REINO                   |       |       |      |       |      |       |      |       |     |     |       |     |
| 2005 | MB0423000 | ENCANTADO                  | 23.27 | 6.30  | 27%  | 16.97 | 73%  | 16.97 | 73%  | 5.76  | 34% | 4%  | 11.21 | 48% |
|      |           | PA DOMINGOS                |       |       |      |       |      |       |      |       |     |     |       |     |
| 2005 | MB0424000 | OLIVEIRA BEZERRA           | 68.26 | 38.18 | 56%  | 30.08 | 44%  | 30.08 | 44%  | 11.12 | 37% | 5%  | 18.96 | 28% |
|      |           | PA SÃO SEBASTIÃO           |       |       |      |       |      |       |      |       |     |     |       |     |
| 2005 | MB0425000 | DO CRISTALINO              | 47.84 | 24.25 | 51%  | 23.59 | 49%  | 23.59 | 49%  | 7.75  | 33% | 4%  | 15.84 | 33% |
| 2005 | MB0426000 | PA SÃO PEDRO II            | 55.07 | 10.67 | 19%  | 44.40 | 81%  | 44.40 | 81%  | 21.30 | 48% | 6%  | 23.09 | 42% |
| 2005 | MB0427000 | PA PIONEIRA                | 20.36 | 8.49  | 42%  | 11.87 | 58%  | 11.87 | 58%  | 4.13  | 35% | 4%  | 7.74  | 38% |
|      |           | PA RIBEIRÃO DAS            |       |       |      |       |      |       |      |       |     |     |       |     |
| 2005 | MB0428000 | PEDRAS                     | 20.17 | 9.74  | 48%  | 10.42 | 52%  | 10.42 | 52%  | 3.43  | 33% | 4%  | 7.00  | 35% |

|      |           |                          |        |       |      |        |     |        |     |       |     |    |       |     |
|------|-----------|--------------------------|--------|-------|------|--------|-----|--------|-----|-------|-----|----|-------|-----|
| 2005 | MB0430000 | PA ARIZONA               | 133.09 | 97.22 | 73%  | 35.87  | 27% | 35.87  | 27% | 12.86 | 36% | 4% | 23.01 | 17% |
| 2005 | MB0432000 | PA PANORAMA              | 35.82  | 34.09 | 95%  | 1.73   | 5%  | 1.73   | 5%  | 0.43  | 25% | 3% | 1.30  | 4%  |
| 2005 | MB0433000 | PA CRISTO VIVE           | 66.77  | 29.34 | 44%  | 37.42  | 56% | 37.42  | 56% | 11.97 | 32% | 4% | 25.45 | 38% |
| 2005 | MB0434000 | PA SERRA GRANDE          | 58.98  | 27.41 | 46%  | 31.58  | 54% | 31.58  | 54% | 10.91 | 35% | 4% | 20.67 | 35% |
| 2005 | MB0435000 | PA NOVA<br>INDEPENDÊNCIA | 60.61  | 16.89 | 28%  | 43.71  | 72% | 43.71  | 72% | 12.66 | 29% | 4% | 31.06 | 51% |
| 2005 | MB0436000 | PA ITAMARATY             | 76.11  | 36.63 | 48%  | 39.48  | 52% | 39.48  | 52% | 20.37 | 52% | 6% | 19.10 | 25% |
| 2005 | MB0437000 | PA ÁGUA BOA              | 7.04   | 7.04  | 100% | 0.00   | 0%  | 0.00   | 0%  | 0.00  |     | 0% | 0.00  | 0%  |
| 2005 | MB0438000 | PA SUMAUMA II            | 50.74  | 13.15 | 26%  | 37.58  | 74% | 37.58  | 74% | 19.62 | 52% | 7% | 17.96 | 35% |
| 2005 | MB0439000 | PA CAMPOS VERDES         | 1.67   | 0.69  | 42%  | 0.98   | 58% | 0.98   | 58% | 0.00  | 0%  | 0% | 0.98  | 58% |
| 2005 | MB0440000 | PA BOM FUTURO            | 29.37  | 1.65  | 6%   | 27.72  | 94% | 27.72  | 94% | 6.39  | 23% | 3% | 21.33 | 73% |
| 2005 | MB0441000 | PA SUNIL                 | 23.58  | 4.11  | 17%  | 19.46  | 83% | 19.46  | 83% | 9.18  | 47% | 6% | 10.28 | 44% |
| 2005 | MB0442000 | PA JORDÃO                | 30.30  | 4.63  | 15%  | 25.67  | 85% | 25.67  | 85% | 11.23 | 44% | 5% | 14.44 | 48% |
| 2005 | MA0994000 | PE TATAJUBAL             | 3.84   | 3.58  | 93%  | 0.26   | 7%  | 0.26   | 7%  | 0.16  | 62% | 8% | 0.10  | 3%  |
| 2005 | MB0443000 | PA CARAJÁS               | 50.98  | 2.85  | 6%   | 48.13  | 94% | 48.13  | 94% | 20.10 | 42% | 5% | 28.03 | 55% |
| 2005 | MB0444000 | PA VIDA NOVA             | 30.53  | 8.05  | 26%  | 22.48  | 74% | 22.48  | 74% | 11.57 | 51% | 6% | 10.91 | 36% |
| 2005 | MB0445000 | PA BARRACA DO<br>MEIO    | 43.78  | 19.21 | 44%  | 24.56  | 56% | 24.56  | 56% | 9.36  | 38% | 5% | 15.20 | 35% |
| 2005 | MB0446000 | PA UXI                   | 79.54  | 34.84 | 44%  | 44.70  | 56% | 44.70  | 56% | 18.44 | 41% | 5% | 26.26 | 33% |
| 2005 | MB0448000 | PA PEDRA BRANCA          | 186.51 | 95.66 | 51%  | 90.85  | 49% | 90.85  | 49% | 39.23 | 43% | 5% | 51.62 | 28% |
| 2005 | MB0450000 | PA RIO BANDEIRA          | 111.48 | 8.72  | 8%   | 102.76 | 92% | 102.76 | 92% | 11.54 | 11% | 1% | 91.21 | 82% |
| 2005 | MB0451000 | PA SANTIAGO              | 37.19  | 0.87  | 2%   | 36.32  | 98% | 36.32  | 98% | 15.53 | 43% | 5% | 20.79 | 56% |
| 2005 | MB0452000 | PA NOVA<br>DESCOBERTA    | 32.54  | 31.61 | 97%  | 0.94   | 3%  | 0.94   | 3%  | 0.00  | 0%  | 0% | 0.94  | 3%  |
| 2005 | MB0453000 | PA LIMPEZA               | 37.74  | 36.84 | 98%  | 0.90   | 2%  | 0.90   | 2%  | 0.06  | 7%  | 1% | 0.83  | 2%  |
| 2005 | MB0454000 | PA MAL ARRUMADO          | 9.90   | 9.35  | 94%  | 0.55   | 6%  | 0.55   | 6%  | 0.15  | 26% | 3% | 0.41  | 4%  |
| 2005 | MB0455000 | PA JOSÉ INOCÊNCIO        | 2.14   | 0.65  | 31%  | 1.48   | 69% | 1.48   | 69% | 0.00  | 0%  | 0% | 1.48  | 69% |



| NERES |           |                                |        |       |      |        |     |        |     |       |      |     |        |     |
|-------|-----------|--------------------------------|--------|-------|------|--------|-----|--------|-----|-------|------|-----|--------|-----|
| 2005  | MB0456000 | PA ÁGUA BRANCA                 | 32.33  | 6.11  | 19%  | 26.23  | 81% | 26.23  | 81% | 17.18 | 65%  | 8%  | 9.05   | 28% |
| 2005  | MB0458000 | PA COLÔNIA<br>PODEROSA         | 70.63  | 36.99 | 52%  | 33.64  | 48% | 33.64  | 48% | 17.37 | 52%  | 6%  | 16.27  | 23% |
| 2005  | MB0459000 | PA OESTE                       | 58.21  | 33.67 | 58%  | 24.54  | 42% | 24.54  | 42% | 10.03 | 41%  | 5%  | 14.51  | 25% |
| 2005  | MB0460000 | PA RIO CURURUÍ                 | 314.12 | 36.55 | 12%  | 277.57 | 88% | 277.57 | 88% | 22.10 | 8%   | 1%  | 255.47 | 81% |
| 2005  | MB0461000 | PA PETRONÍLIO<br>ALVES BATISTA | 145.52 | 27.01 | 19%  | 118.52 | 81% | 118.52 | 81% | 29.08 | 25%  | 3%  | 89.43  | 61% |
| 2005  | MB0462000 | PA NOVA<br>JERUZALÉM           | 5.77   | 5.63  | 98%  | 0.14   | 2%  | 0.14   | 2%  | 0.14  | 100% | 13% | 0.00   | 0%  |
| 2005  | MB0463000 | PA SÃO VICENTE                 | 55.46  | 10.32 | 19%  | 45.15  | 81% | 45.15  | 81% | 14.63 | 32%  | 4%  | 30.51  | 55% |
| 2005  | MB0467000 | PA HAMILTON<br>CORDEIRO CELSO  | 138.84 | 46.31 | 33%  | 92.53  | 67% | 92.53  | 67% | 47.99 | 52%  | 6%  | 44.54  | 32% |
| 2005  | MB0469000 | PA CENTRO NOVO                 | 27.09  | 25.38 | 94%  | 1.72   | 6%  | 1.72   | 6%  | 0.07  | 4%   | 1%  | 1.64   | 6%  |
| 2005  | MB0472000 | PA BACURIZINHO                 | 13.76  | 7.54  | 55%  | 6.22   | 45% | 6.22   | 45% | 3.80  | 61%  | 8%  | 2.42   | 18% |
| 2005  | MB0473000 | PA SOL NASCENTE                | 29.63  | 11.73 | 40%  | 17.90  | 60% | 17.90  | 60% | 3.22  | 18%  | 2%  | 14.68  | 50% |
| 2005  | MT0724000 | PA ALIANÇA                     | 4.89   | 1.38  | 28%  | 3.52   | 72% | 3.52   | 72% | 2.64  | 75%  | 9%  | 0.87   | 18% |
| 2005  | MT0725000 | PA CRISTALINO                  | 24.22  | 0.42  | 2%   | 23.80  | 98% | 23.80  | 98% | 11.60 | 49%  | 6%  | 12.20  | 50% |
| 2005  | MT0726000 | PA CRISTALINO II               | 8.83   | 2.68  | 30%  | 6.15   | 70% | 6.15   | 70% | 3.13  | 51%  | 6%  | 3.02   | 34% |
| 2005  | MT0727000 | PA CRISTALINO - IV             | 6.75   | 3.42  | 51%  | 3.34   | 49% | 3.34   | 49% | 1.77  | 53%  | 7%  | 1.57   | 23% |
| 2005  | MT0731000 | PA ANTONIO SOARES              | 159.73 | 9.26  | 6%   | 150.47 | 94% | 150.47 | 94% | 35.10 | 23%  | 3%  | 115.37 | 72% |
| 2005  | MT0733000 | PA NOSSA SENHORA<br>DE FÁTIMA  | 24.25  | 24.23 | 100% | 0.02   | 0%  | 0.02   | 0%  | 0.00  | 0%   | 0%  | 0.02   | 0%  |
| 2005  | MT0734000 | PA PADRE JOSÉ<br>TENCATE       | 13.24  | 11.25 | 85%  | 1.99   | 15% | 1.99   | 15% | 0.00  | 0%   | 0%  | 1.99   | 15% |
| 2005  | MT0735000 | PA UIRAPURU                    | 5.42   | 4.39  | 81%  | 1.03   | 19% | 1.03   | 19% | 0.41  | 40%  | 5%  | 0.62   | 11% |
| 2005  | MT0736000 | PA LOURIVAL D'ABIC             | 11.99  | 6.22  | 52%  | 5.76   | 48% | 5.76   | 48% | 3.35  | 58%  | 7%  | 2.41   | 20% |

|      |           |                         |        |       |     |        |      |        |      |       |     |    |        |     |
|------|-----------|-------------------------|--------|-------|-----|--------|------|--------|------|-------|-----|----|--------|-----|
| 2005 | MT0737000 | PA VIDA NOVA II         | 97.72  | 11.56 | 12% | 86.16  | 88%  | 86.16  | 88%  | 24.47 | 28% | 4% | 61.69  | 63% |
| 2005 | MT0746000 | PA SANTO ANTONIO        | 7.97   | 5.62  | 71% | 2.35   | 29%  | 2.35   | 29%  | 0.37  | 16% | 2% | 1.98   | 25% |
| 2005 | MT0768000 | PA SANTO ANTONIO<br>I   | 6.67   | 5.88  | 88% | 0.79   | 12%  | 0.79   | 12%  | 0.32  | 40% | 5% | 0.47   | 7%  |
| 2005 | MT0769000 | PA SANTO ANTONIO<br>II  | 7.62   | 7.56  | 99% | 0.06   | 1%   | 0.06   | 1%   | 0.00  | 0%  | 0% | 0.06   | 1%  |
| 2005 | MT0776000 | PA PLANALTO DO<br>IRIRI | 159.18 | 5.59  | 4%  | 153.59 | 96%  | 153.59 | 96%  | 59.94 | 39% | 5% | 93.65  | 59% |
| 2005 | MT0777000 | PA ARAUNA               | 29.05  | 0.67  | 2%  | 28.38  | 98%  | 28.38  | 98%  | 17.42 | 61% | 8% | 10.97  | 38% |
| 2005 | MT0778000 | PA ARAUNA II            | 11.51  | 0.00  | 0%  | 11.51  | 100% | 11.51  | 100% | 6.55  | 57% | 7% | 4.97   | 43% |
| 2005 | PA0286000 | PA MANDACARU            | 43.88  | 29.24 | 67% | 14.63  | 33%  | 14.63  | 33%  | 9.32  | 64% | 8% | 5.31   | 12% |
| 2005 | PA0287000 | PA DIAMANTINA II        | 22.61  | 17.66 | 78% | 4.95   | 22%  | 4.95   | 22%  | 1.66  | 33% | 4% | 3.29   | 15% |
| 2005 | PA0288000 | PA ALTA FLORESTA        | 40.18  | 13.42 | 33% | 26.75  | 67%  | 26.75  | 67%  | 10.72 | 40% | 5% | 16.04  | 40% |
| 2005 | PA0289000 | PA TERRA NOVA           | 57.35  | 47.54 | 83% | 9.81   | 17%  | 9.81   | 17%  | 3.55  | 36% | 5% | 6.26   | 11% |
| 2005 | PA0290000 | PA SUÇUARANA            | 42.22  | 28.98 | 69% | 13.24  | 31%  | 13.24  | 31%  | 8.62  | 65% | 8% | 4.61   | 11% |
| 2005 | RR0041000 | PA PAU RAINHA           | 118.30 | 3.08  | 3%  | 115.22 | 97%  | 115.22 | 97%  | 3.63  | 3%  | 0% | 111.59 | 94% |
| 2005 | RR0042000 | PA CUPIUBA              | 132.45 | 3.29  | 2%  | 129.16 | 98%  | 129.16 | 98%  | 4.32  | 3%  | 0% | 124.84 | 94% |
| 2005 | RR0043000 | PA CASTANHEIRA          | 103.22 | 0.45  | 0%  | 102.76 | 100% | 102.76 | 100% | 3.08  | 3%  | 0% | 99.68  | 97% |
| 2005 | RR0044000 | PA ANGELIN              | 55.51  | 1.24  | 2%  | 54.27  | 98%  | 54.27  | 98%  | 2.38  | 4%  | 1% | 51.89  | 93% |
| 2005 | RR0045000 | PA SERINGUEIRA          | 121.19 | 4.43  | 4%  | 116.76 | 96%  | 116.76 | 96%  | 8.85  | 8%  | 1% | 107.91 | 89% |
| 2005 | RR0046000 | PA JATOBA               | 195.80 | 9.52  | 5%  | 186.28 | 95%  | 186.28 | 95%  | 7.37  | 4%  | 0% | 178.91 | 91% |
| 2005 | SM0105000 | PA MARIPÁ               | 85.88  | 59.61 | 69% | 26.27  | 31%  | 26.27  | 31%  | 2.48  | 9%  | 1% | 23.79  | 28% |
| 2005 | SM0106000 | PA BAIXÃO               | 100.60 | 64.00 | 64% | 36.60  | 36%  | 36.60  | 36%  | 5.42  | 15% | 2% | 31.18  | 31% |
| 2005 | SM0107000 | PA MORIÇOCA             | 8.85   | 5.22  | 59% | 3.63   | 41%  | 3.63   | 41%  | 1.02  | 28% | 4% | 2.61   | 29% |
| 2005 | SM0108000 | PA VAI QUEM QUER        | 20.54  | 9.84  | 48% | 10.70  | 52%  | 10.70  | 52%  | 1.68  | 16% | 2% | 9.02   | 44% |
| 2005 | SM0109000 | PA MIRITI               | 126.64 | 87.11 | 69% | 39.53  | 31%  | 39.53  | 31%  | 9.69  | 25% | 3% | 29.84  | 24% |
| 2005 | SM0110000 | PA TERRA PRETA E        | 34.64  | 18.65 | 54% | 15.99  | 46%  | 15.99  | 46%  | 2.35  | 15% | 2% | 13.64  | 39% |

## OLHO D'ÁGUA

|      |           |                       |        |        |      |        |     |        |     |       |     |    |        |     |
|------|-----------|-----------------------|--------|--------|------|--------|-----|--------|-----|-------|-----|----|--------|-----|
| 2005 | SM0111000 | PA CURUMU             | 14.37  | 12.50  | 87%  | 1.87   | 13% | 1.87   | 13% | 0.52  | 28% | 3% | 1.35   | 9%  |
| 2005 | SM0112000 | PA CAMBURÃO I         | 129.12 | 118.60 | 92%  | 10.53  | 8%  | 10.53  | 8%  | 0.94  | 9%  | 1% | 9.58   | 7%  |
| 2005 | SM0114000 | PA URUCURITUBA        | 151.45 | 44.33  | 29%  | 107.12 | 71% | 107.12 | 71% | 6.78  | 6%  | 1% | 100.33 | 66% |
| 2005 | SM0115000 | PA SANTA CRUZ         | 217.73 | 35.75  | 16%  | 181.98 | 84% | 181.98 | 84% | 2.99  | 2%  | 0% | 178.98 | 82% |
| 2005 | SM0116000 | PA DANIEL DE CARVALHO | 193.49 | 45.62  | 24%  | 147.86 | 76% | 147.86 | 76% | 6.35  | 4%  | 1% | 141.51 | 73% |
| 2005 | SM0117000 | PA BRASÍLIA LEGAL     | 244.38 | 120.26 | 49%  | 124.12 | 51% | 124.12 | 51% | 17.13 | 14% | 2% | 106.99 | 44% |
| 2005 | SM0119000 | PA CAMBURÃO II        | 39.54  | 20.54  | 52%  | 19.00  | 48% | 19.00  | 48% | 3.37  | 18% | 2% | 15.63  | 40% |
| 2005 | SM0120000 | PA PORÃO              | 27.44  | 26.96  | 98%  | 0.48   | 2%  | 0.48   | 2%  | 0.09  | 19% | 2% | 0.39   | 1%  |
| 2005 | SM0128000 | PA RENASCER           | 85.80  | 16.12  | 19%  | 69.68  | 81% | 69.68  | 81% | 21.86 | 31% | 4% | 47.81  | 56% |
| 2005 | SM0129000 | PA CUPUZAL            | 113.02 | 28.32  | 25%  | 84.70  | 75% | 84.70  | 75% | 18.83 | 22% | 3% | 65.87  | 58% |
| 2005 | SM0130000 | PA TERRA PARA PAZ     | 641.63 | 14.00  | 2%   | 627.63 | 98% | 627.63 | 98% | 23.03 | 4%  | 0% | 604.61 | 94% |
| 2005 | SM0131000 | PA JAMARY             | 314.48 | 140.51 | 45%  | 173.97 | 55% | 173.97 | 55% | 12.21 | 7%  | 1% | 161.76 | 51% |
| 2005 | SM0135000 | PA CRISTO REI         | 75.97  | 75.97  | 100% | 0.00   | 0%  | 0.00   | 0%  | 0.00  |     | 0% | 0.00   | 0%  |
| 2005 | SM0136000 | PA REPARTIMENTO       | 375.16 | 220.64 | 59%  | 154.52 | 41% | 154.52 | 41% | 18.61 | 12% | 2% | 135.91 | 36% |
| 2005 | SM0137000 | PA MAMURU             | 214.68 | 131.50 | 61%  | 83.18  | 39% | 83.18  | 39% | 8.13  | 10% | 1% | 75.05  | 35% |
| 2005 | SM0138000 | PA CURUMU II          | 225.85 | 124.94 | 55%  | 100.90 | 45% | 100.90 | 45% | 9.84  | 10% | 1% | 91.07  | 40% |
| 2005 | SM0139000 | PA CIPOAL             | 348.62 | 237.69 | 68%  | 110.93 | 32% | 110.93 | 32% | 22.29 | 20% | 3% | 88.64  | 25% |
| 2005 | SM0140000 | PA VALE DO AÇÁÍ       | 178.51 | 138.9  | 78%  | 39.56  | 22% | 39.56  | 22% | 6.81  | 17% | 2% | 32.76  | 18% |

|      |           |                            |          |       |      |           |      |          |      |       |     |    |           |      |  |
|------|-----------|----------------------------|----------|-------|------|-----------|------|----------|------|-------|-----|----|-----------|------|--|
|      |           |                            |          | 4     |      |           |      |          |      |       |     |    |           |      |  |
| 2005 | SM0143000 | PA ITAQUERA I              | 318.55   | 88.54 | 28%  | 230.02    | 72%  | 230.02   | 72%  | 15.15 | 7%  | 1% | 214.87    | 67%  |  |
| 2005 | SM0145000 | PA CURUÁ                   | 758.58   | 130.5 | 17%  | 628.04    | 83%  | 628.04   | 83%  | 21.00 | 3%  | 0% | 607.04    | 80%  |  |
|      |           |                            |          | 5     |      |           |      |          |      |       |     |    |           |      |  |
| 2005 | SM0147000 | PA VIRA VOLTA              | 33.89    | 14.12 | 42%  | 19.77     | 58%  | 19.77    | 58%  | 3.53  | 18% | 2% | 16.24     | 48%  |  |
| 2005 | SM0148000 | PA ACOMEC                  | 84.72    | 13.09 | 15%  | 71.64     | 85%  | 71.64    | 85%  | 4.90  | 7%  | 1% | 66.73     | 79%  |  |
| 2005 | TO0327000 | PA MARÍLIA                 | 26.88    | 25.82 | 96%  | 1.06      | 4%   | 1.06     | 4%   | 0.30  | 28% | 4% | 0.76      | 3%   |  |
| 2005 | TO0328000 | PA ORLÂNDIA                | 7.59     | 7.17  | 94%  | 0.42      | 6%   | 0.42     | 6%   | 0.10  | 24% | 3% | 0.32      | 4%   |  |
| 2005 | TO0330000 | PA 20 MIL                  | 9.85     | 9.85  | 100% | 0.00      | 0%   | 0.00     | 0%   | 0.00  |     | 0% | 0.00      | 0%   |  |
| 2005 | TO0372000 | PA LAGO DA<br>UMBAÚBA      | 0.05     | 0.05  | 100% | 0.00      | 0%   | 0.00     | 0%   | 0.00  |     | 0% | 0.00      | 0%   |  |
| 2005 | AC0115000 | PAE BARREIRO               | 81.61    | 2.82  | 3%   | 78.79     | 97%  | 78.79    | 97%  | 2.57  | 3%  | 0% | 76.22     | 93%  |  |
| 2005 | AM0059000 | PAE ABACAXIS II            | 2757.33  | 43.43 | 2%   | 2,713.90  | 98%  | 2,713.90 | 98%  | 5.15  | 0%  | 0% | 2,708.75  | 98%  |  |
| 2005 | AM0060000 | PAE TROCANÃ                | 689.39   | 29.78 | 4%   | 659.60    | 96%  | 659.60   | 96%  | 5.00  | 1%  | 0% | 654.60    | 95%  |  |
| 2005 | AM0065000 | PAE INAJÁ                  | 498.37   | 26.64 | 5%   | 471.72    | 95%  | 471.72   | 95%  | 2.56  | 1%  | 0% | 469.17    | 94%  |  |
| 2005 | AM0066000 | PAE ACARÁ                  | 1665.60  | 48.80 | 3%   | 1,616.80  | 97%  | 1,616.80 | 97%  | 18.27 | 1%  | 0% | 1,598.53  | 96%  |  |
| 2005 | AM0068000 | PAE PIRANHA                | 430.32   | 2.82  | 1%   | 427.50    | 99%  | 427.50   | 99%  | 7.14  | 2%  | 0% | 420.36    | 98%  |  |
| 2005 | AM0069000 | PAE NOVO JARDIM            | 354.11   | 23.14 | 7%   | 330.97    | 93%  | 330.97   | 93%  | 8.26  | 2%  | 0% | 322.72    | 91%  |  |
| 2005 | AM0073000 | PAE TERRA FIRME            | 73.60    | 2.09  | 3%   | 71.51     | 97%  | 71.51    | 97%  | 0.98  | 1%  | 0% | 70.54     | 96%  |  |
| 2005 | AM0074000 | PAE ARIPUANÃ-<br>GUARIBA   | 10418.41 | 105.3 | 1%   | 10,313.09 | 99%  | 10,313.0 | 99%  | 48.74 | 0%  | 0% | 10,264.35 | 99%  |  |
|      |           |                            |          | 2     |      |           |      |          |      |       |     |    |           |      |  |
| 2005 | AM0080000 | PAE SÃO BENEDITO           | 1935.67  | 7.46  | 0%   | 1,928.21  | 100% | 1,928.21 | 100% | 3.20  | 0%  | 0% | 1,925.00  | 99%  |  |
| 2005 | AM0082000 | PAE TUPANA IGAPÓ-<br>AÃU I | 1569.83  | 4.03  | 0%   | 1,565.80  | 100% | 1,565.80 | 100% | 0.35  | 0%  | 0% | 1,565.45  | 100% |  |
| 2005 | PA0291000 | PAE ILHA DAS<br>ONÇAS      | 73.48    | 0.17  | 0%   | 73.31     | 100% | 73.31    | 100% | 0.27  | 0%  | 0% | 73.05     | 99%  |  |
| 2005 | PA0292000 | PAE JOÃO PILATOS           | 36.62    | 2.25  | 6%   | 34.38     | 94%  | 34.38    | 94%  | 0.66  | 2%  | 0% | 33.72     | 92%  |  |

|      |           |                                       |         |         |     |          |      |          |      |       |    |    |          |      |
|------|-----------|---------------------------------------|---------|---------|-----|----------|------|----------|------|-------|----|----|----------|------|
| 2005 | PA0293000 | PAE SANTO ANTONIO                     | 13.17   | 0.00    | 0%  | 13.17    | 100% | 13.17    | 100% | 0.00  | 0% | 0% | 13.17    | 100% |
| 2005 | PA0294000 | PAE NOSSA SENHORA DE NAZARÉ           | 9.73    | 0.18    | 2%  | 9.55     | 98%  | 9.55     | 98%  | 0.00  | 0% | 0% | 9.55     | 98%  |
| 2005 | PA0295000 | PAE NOSSA SENHORA DO PERPETUO SOCORRO | 27.28   | 1.34    | 5%  | 25.94    | 95%  | 25.94    | 95%  | 0.34  | 1% | 0% | 25.61    | 94%  |
| 2005 | PA0296000 | PAE ILHA SANTA ROSA                   | 3.66    | 0.04    | 1%  | 3.62     | 99%  | 3.62     | 99%  | 0.08  | 2% | 0% | 3.54     | 97%  |
| 2005 | PA0298000 | PAE ILHA VIÇOSA                       | 3.27    | 0.00    | 0%  | 3.27     | 100% | 3.27     | 100% | 0.00  | 0% | 0% | 3.27     | 100% |
| 2005 | PA0299000 | PAE ILHA ARAPIRANGA                   | 34.68   | 1.30    | 4%  | 33.38    | 96%  | 33.38    | 96%  | 0.13  | 0% | 0% | 33.25    | 96%  |
| 2005 | PA0300000 | PAE SANTA MARIA                       | 6.75    | 0.00    | 0%  | 6.75     | 100% | 6.75     | 100% | 0.00  | 0% | 0% | 6.75     | 100% |
| 2005 | PA0301000 | PAE SANTO AFONSO                      | 25.59   | 10.34   | 40% | 15.24    | 60%  | 15.24    | 60%  | 0.17  | 1% | 0% | 15.07    | 59%  |
| 2005 | PA0302000 | PAE NOSSA SENHORA DAS GRAÇAS          | 18.54   | 2.23    | 12% | 16.31    | 88%  | 16.31    | 88%  | 0.00  | 0% | 0% | 16.31    | 88%  |
| 2005 | PA0303000 | PAE SANTO ANTONIO II                  | 8.72    | 2.10    | 24% | 6.63     | 76%  | 6.63     | 76%  | 0.00  | 0% | 0% | 6.63     | 76%  |
| 2005 | PA0304000 | PAE SÃO FRANCISCO DE ASSIS            | 4.31    | 0.00    | 0%  | 4.31     | 100% | 4.31     | 100% | 0.00  | 0% | 0% | 4.31     | 100% |
| 2005 | PA0305000 | PAE SÃO RAIMUNDO                      | 24.78   | 5.38    | 22% | 19.41    | 78%  | 19.41    | 78%  | 0.14  | 1% | 0% | 19.27    | 78%  |
| 2005 | SM0104000 | PAE LAGO GRANDE                       | 2557.36 | 1134.05 | 44% | 1,423.31 | 56%  | 1,423.31 | 56%  | 18.56 | 1% | 0% | 1,404.76 | 55%  |
| 2005 | SM0113000 | PAE JURUTI VELHO                      | 854.29  | 227.27  | 27% | 627.03   | 73%  | 627.03   | 73%  | 12.52 | 2% | 0% | 614.51   | 72%  |

|      |           |                                 |         |            |     |          |      |          |      |       |     |    |          |     |
|------|-----------|---------------------------------|---------|------------|-----|----------|------|----------|------|-------|-----|----|----------|-----|
| 2005 | SM0121000 | PAE MISSIONÁRIO<br>RUFINO       | 57.59   | 19.98      | 35% | 37.61    | 65%  | 37.61    | 65%  | 1.59  | 4%  | 1% | 36.02    | 63% |
| 2005 | SM0122000 | PAE VALE DO<br>SALGADO          | 169.29  | 104.6<br>7 | 62% | 64.61    | 38%  | 64.61    | 38%  | 16.71 | 26% | 3% | 47.91    | 28% |
| 2005 | SM0141000 | PAE EIXO FORTE                  | 163.52  | 73.98      | 45% | 89.53    | 55%  | 89.53    | 55%  | 10.14 | 11% | 1% | 79.39    | 49% |
| 2005 | AC0114000 | PDS NOVA<br>ESPERANÇA           | 31.23   | 2.06       | 7%  | 29.18    | 93%  | 29.18    | 93%  | 5.16  | 18% | 2% | 24.02    | 77% |
| 2005 | AC0119000 | PDS BONAL                       | 112.23  | 16.55      | 15% | 95.68    | 85%  | 95.68    | 85%  | 0.50  | 1%  | 0% | 95.18    | 85% |
| 2005 | AC0122000 | PDS MINAS                       | 28.94   | 0.27       | 1%  | 28.67    | 99%  | 28.67    | 99%  | 0.99  | 3%  | 0% | 27.68    | 96% |
| 2005 | AC0123000 | PDS FRANCISCO<br>PIMENTEL       | 543.59  | 20.22      | 4%  | 523.36   | 96%  | 523.36   | 96%  | 5.01  | 1%  | 0% | 518.35   | 95% |
| 2005 | AM0064000 | PDS MANDIOCA                    | 48.74   | 30.98      | 64% | 17.77    | 36%  | 17.77    | 36%  | 1.37  | 8%  | 1% | 16.39    | 34% |
| 2005 | AM0067000 | PDS RAINHA                      | 196.95  | 7.66       | 4%  | 189.29   | 96%  | 189.29   | 96%  | 4.18  | 2%  | 0% | 185.10   | 94% |
| 2005 | AM0070000 | PDS<br>CUIEIRAS/ANAVILHA<br>NAS | 1900.05 | 18.38      | 1%  | 1,881.67 | 99%  | 1,881.67 | 99%  | 1.33  | 0%  | 0% | 1,880.34 | 99% |
| 2005 | AP0037000 | PDS - IRINEU E<br>FELIPE        | 99.98   | 0.54       | 1%  | 99.44    | 99%  | 99.44    | 99%  | 0.80  | 1%  | 0% | 98.63    | 99% |
| 2005 | SM0099000 | PDS SERRA AZUL                  | 739.45  | 7.23       | 1%  | 732.22   | 99%  | 732.22   | 99%  | 30.99 | 4%  | 1% | 701.23   | 95% |
| 2005 | SM0101000 | PDS ADEMIR<br>FEDERICCE         | 2331.50 | 77.33      | 3%  | 2,254.17 | 97%  | 2,254.17 | 97%  | 54.09 | 2%  | 0% | 2,200.09 | 94% |
| 2005 | SM0118000 | PDS BRASÍLIA                    | 192.89  | 4.82       | 3%  | 188.07   | 97%  | 188.07   | 97%  | 71.35 | 38% | 5% | 116.72   | 61% |
| 2005 | SM0123000 | PDS MALOCA                      | 312.28  | 93.08      | 30% | 219.21   | 70%  | 219.21   | 70%  | 19.97 | 9%  | 1% | 199.24   | 64% |
| 2005 | SM0125000 | PDS VALE DO<br>JAMANXIM         | 882.37  | 69.34      | 8%  | 813.03   | 92%  | 813.03   | 92%  | 48.95 | 6%  | 1% | 764.08   | 87% |
| 2005 | SM0126000 | PDS ÁGUA PRETA                  | 248.40  | 3.06       | 1%  | 245.34   | 99%  | 245.34   | 99%  | 16.36 | 7%  | 1% | 228.99   | 92% |
| 2005 | SM0127000 | PDS CASTANHEIRA                 | 258.15  | 0.64       | 0%  | 257.51   | 100% | 257.51   | 100% | 13.11 | 5%  | 1% | 244.40   | 95% |

|      |           |                                |         |            |     |          |      |          |      |            |     |    |          |     |
|------|-----------|--------------------------------|---------|------------|-----|----------|------|----------|------|------------|-----|----|----------|-----|
| 2005 | SM0144000 | PDS RENASCER II                | 373.87  | 1.08       | 0%  | 372.79   | 100% | 372.79   | 100% | 1.95       | 1%  | 0% | 370.85   | 99% |
| 2005 | SM0146000 | PDS PARAÍSO                    | 1246.55 | 15.96      | 1%  | 1,230.59 | 99%  | 1,230.59 | 99%  | 19.65      | 2%  | 0% | 1,210.94 | 97% |
| 2005 | SM0149000 | PDS LIBERDADE                  | 2437.63 | 374.6<br>1 | 15% | 2,063.02 | 85%  | 2,063.02 | 85%  | 270.8<br>7 | 13% | 2% | 1,792.15 | 74% |
| 2006 | AC0127000 | PDS IVO NEVES                  | 40.57   | 5.85       | 14% | 34.72    | 86%  | 34.72    | 86%  | 10.23      | 29% | 4% | 24.49    | 60% |
| 2006 | AC0128000 | PDS WILSON LOPES               | 168.62  | 57.01      | 34% | 111.60   | 66%  | 111.60   | 66%  | 29.47      | 26% | 4% | 82.13    | 49% |
| 2006 | AC0129000 | PA LUZ DA VIDA                 | 3.79    | 3.07       | 81% | 0.72     | 19%  | 0.72     | 19%  | 0.12       | 16% | 2% | 0.61     | 16% |
| 2006 | AC0130000 | PDS POLO RECANTO<br>DO EQUADOR | 19.24   | 6.33       | 33% | 12.91    | 67%  | 12.91    | 67%  | 4.11       | 32% | 5% | 8.81     | 46% |
| 2006 | AC0131000 | PDS GERALDO<br>FERNANDES       | 19.50   | 0.68       | 3%  | 18.82    | 97%  | 18.82    | 97%  | 5.86       | 31% | 4% | 12.96    | 66% |
| 2006 | AC0132000 | PDS POLO PIRÃ-DE-<br>RÃ        | 13.66   | 10.82      | 79% | 2.84     | 21%  | 2.84     | 21%  | 0.03       | 1%  | 0% | 2.82     | 21% |
| 2006 | AC0136000 | PDS LÍDIA CRAVEIRO             | 8.05    | 0.11       | 1%  | 7.94     | 99%  | 7.94     | 99%  | 2.64       | 33% | 5% | 5.30     | 66% |
| 2006 | AC0137000 | PA URUBURETAMA                 | 22.59   | 0.98       | 4%  | 21.61    | 96%  | 21.61    | 96%  | 0.14       | 1%  | 0% | 21.47    | 95% |
| 2006 | AC0138000 | PDS SETE LAGOAS                | 24.04   | 2.98       | 12% | 21.06    | 88%  | 21.06    | 88%  | 0.77       | 4%  | 1% | 20.29    | 84% |
| 2006 | AC0139000 | PA CALIFÓRNIA                  | 56.58   | 21.04      | 37% | 35.54    | 63%  | 35.54    | 63%  | 4.34       | 12% | 2% | 31.21    | 55% |
| 2006 | AM0081000 | PAE CABALIANA I                | 622.45  | 199.8<br>6 | 32% | 422.58   | 68%  | 422.58   | 68%  | 6.71       | 2%  | 0% | 415.87   | 67% |
| 2006 | AM0083000 | PAE PURUS                      | 6488.12 | 114.7<br>0 | 2%  | 6,373.42 | 98%  | 6,373.42 | 98%  | 17.30      | 0%  | 0% | 6,356.11 | 98% |
| 2006 | AM0085000 | PDS NOVA<br>ESPERANÇA          | 3.12    | 2.76       | 88% | 0.36     | 12%  | 0.36     | 12%  | 0.17       | 47% | 7% | 0.19     | 6%  |
| 2006 | AM0087000 | PAE MARIPITI                   | 1175.71 | 24.71      | 2%  | 1,151.00 | 98%  | 1,151.00 | 98%  | 6.75       | 1%  | 0% | 1,144.24 | 97% |
| 2006 | AM0094000 | PAE ONÇAS                      | 39.86   | 0.03       | 0%  | 39.82    | 100% | 39.82    | 100% | 0.90       | 2%  | 0% | 38.92    | 98% |
| 2006 | AM0095000 | PAE CABALIANA II               | 960.91  | 23.44      | 2%  | 937.47   | 98%  | 937.47   | 98%  | 15.95      | 2%  | 0% | 921.52   | 96% |
| 2006 | AM0098000 | PAE BELA VISTA II              | 283.43  | 146.2      | 52% | 137.21   | 48%  | 137.21   | 48%  | 1.90       | 1%  | 0% | 135.30   | 48% |

2

|      |           |                                  |        |       |      |        |     |        |     |       |     |    |        |     |
|------|-----------|----------------------------------|--------|-------|------|--------|-----|--------|-----|-------|-----|----|--------|-----|
|      |           | PA QUADRA                        |        |       |      |        |     |        |     |       |     |    |        |     |
| 2006 | MA0136000 | RENASCER<br>II/COLONE            | 1.52   | 1.52  | 100% | 0.00   | 0%  | 0.00   | 0%  | 0.00  |     | 0% | 0.00   | 0%  |
| 2006 | MA0153000 | PA OLHO D ÁGUA DO<br>TURI/COLONE | 10.20  | 10.20 | 100% | 0.00   | 0%  | 0.00   | 0%  | 0.00  |     | 0% | 0.00   | 0%  |
| 2006 | MA0835000 | PA TAMBOR CENTRO<br>VELHO        | 32.78  | 32.63 | 100% | 0.15   | 0%  | 0.15   | 0%  | 0.06  | 41% | 6% | 0.09   | 0%  |
| 2006 | MA0954000 | PA MAPISA                        | 91.85  | 63.19 | 69%  | 28.66  | 31% | 28.66  | 31% | 6.94  | 24% | 3% | 21.72  | 24% |
| 2006 | MA0962000 | PE TATAJUBA                      | 54.77  | 30.67 | 56%  | 24.09  | 44% | 24.09  | 44% | 0.90  | 4%  | 1% | 23.19  | 42% |
| 2006 | MA0965000 | PA JIQUIRI / SANTO<br>AGOSTINHO  | 11.52  | 10.79 | 94%  | 0.73   | 6%  | 0.73   | 6%  | 0.30  | 42% | 6% | 0.43   | 4%  |
| 2006 | MA0998000 | PA SÃO<br>BARTOLOMEU /<br>CIAMA  | 32.35  | 24.66 | 76%  | 7.70   | 24% | 7.70   | 24% | 2.87  | 37% | 5% | 4.82   | 15% |
| 2006 | MA0999000 | PA TORRÃO<br>MUQUEM              | 4.89   | 4.89  | 100% | 0.00   | 0%  | 0.00   | 0%  | 0.00  |     | 0% | 0.00   | 0%  |
| 2006 | MA1002000 | PA FÊNIX                         | 93.48  | 48.44 | 52%  | 45.04  | 48% | 45.04  | 48% | 22.86 | 51% | 7% | 22.18  | 24% |
| 2006 | MA1003000 | PA TERRA LIVRE                   | 33.23  | 8.31  | 25%  | 24.92  | 75% | 24.92  | 75% | 4.14  | 17% | 2% | 20.78  | 63% |
| 2006 | MA1025000 | PA CATINGUEIRO                   | 6.70   | 6.70  | 100% | 0.00   | 0%  | 0.00   | 0%  | 0.00  |     | 0% | 0.00   | 0%  |
| 2006 | MB0474000 | PA CLÉZINHO                      | 46.65  | 25.30 | 54%  | 21.35  | 46% | 21.35  | 46% | 8.84  | 41% | 6% | 12.51  | 27% |
| 2006 | MB0475000 | PA NOSSA SENHORA<br>APARECIDA II | 2.12   | 0.95  | 45%  | 1.17   | 55% | 1.17   | 55% | 0.00  | 0%  | 0% | 1.17   | 55% |
| 2006 | MB0476000 | PA TIRADENTES                    | 2.73   | 1.47  | 54%  | 1.26   | 46% | 1.26   | 46% | 0.52  | 42% | 6% | 0.74   | 27% |
| 2006 | MB0477000 | PA ARARANDEUA                    | 273.91 | 89.13 | 33%  | 184.77 | 67% | 184.77 | 67% | 42.25 | 23% | 3% | 142.53 | 52% |
| 2006 | MB0478000 | PA IRMÃ DOROTY                   | 30.93  | 0.39  | 1%   | 30.54  | 99% | 30.54  | 99% | 3.22  | 11% | 2% | 27.32  | 88% |
| 2006 | MB0480000 | PA COSME E DAMIÃO                | 15.47  | 12.40 | 80%  | 3.07   | 20% | 3.07   | 20% | 1.95  | 64% | 9% | 1.12   | 7%  |



|      |           |                         |        |            |      |        |      |        |      |            |     |    |        |      |
|------|-----------|-------------------------|--------|------------|------|--------|------|--------|------|------------|-----|----|--------|------|
| 2006 | MB0481000 | PA SANTA CECILIA        | 9.34   | 1.99       | 21%  | 7.34   | 79%  | 7.34   | 79%  | 2.27       | 31% | 4% | 5.08   | 54%  |
| 2006 | MB0483000 | PA CENTRO NOVO II       | 36.14  | 35.04      | 97%  | 1.10   | 3%   | 1.10   | 3%   | 0.10       | 9%  | 1% | 1.00   | 3%   |
| 2006 | MB0484000 | PA SANTA ELIZA          | 33.46  | 33.45      | 100% | 0.01   | 0%   | 0.01   | 0%   | 0.00       | 0%  | 0% | 0.01   | 0%   |
| 2006 | MB0485000 | PA MORADA NOVA          | 148.12 | 73.87      | 50%  | 74.26  | 50%  | 74.26  | 50%  | 20.35      | 27% | 4% | 53.91  | 36%  |
| 2006 | MB0486000 | PA MORADA NOVA II       | 114.47 | 39.03      | 34%  | 75.44  | 66%  | 75.44  | 66%  | 21.04      | 28% | 4% | 54.40  | 48%  |
| 2006 | MB0489000 | PA DEUS É PAZ           | 77.70  | 68.79      | 89%  | 8.91   | 11%  | 8.91   | 11%  | 0.42       | 5%  | 1% | 8.49   | 11%  |
| 2006 | MB0491000 | PA POMBAL               | 862.49 | 176.3<br>1 | 20%  | 686.18 | 80%  | 686.18 | 80%  | 192.6<br>2 | 28% | 4% | 493.56 | 57%  |
| 2006 | MB0492000 | PA FELICIDADE           | 52.86  | 47.65      | 90%  | 5.20   | 10%  | 5.20   | 10%  | 2.38       | 46% | 7% | 2.82   | 5%   |
| 2006 | MB0493000 | PA 1° DE MAIO           | 28.71  | 19.51      | 68%  | 9.19   | 32%  | 9.19   | 32%  | 4.29       | 47% | 7% | 4.90   | 17%  |
| 2006 | MT0758000 | PA MARUMBI              | 39.12  | 24.28      | 62%  | 14.84  | 38%  | 14.84  | 38%  | 1.76       | 12% | 2% | 13.08  | 33%  |
| 2006 | MT0760000 | PA PINHEIRO VELHO       | 30.13  | 15.89      | 53%  | 14.24  | 47%  | 14.24  | 47%  | 4.80       | 34% | 5% | 9.44   | 31%  |
| 2006 | MT0764000 | PA SÃO JUDAS            | 68.21  | 54.28      | 80%  | 13.94  | 20%  | 13.94  | 20%  | 3.49       | 25% | 4% | 10.44  | 15%  |
| 2006 | MT0789000 | PA BOA ESPERANÇA<br>I   | 3.40   | 2.73       | 80%  | 0.67   | 20%  | 0.67   | 20%  | 0.30       | 46% | 7% | 0.36   | 11%  |
| 2006 | MT0793000 | PA CANÃA I              | 37.64  | 28.78      | 76%  | 8.86   | 24%  | 8.86   | 24%  | 2.06       | 23% | 3% | 6.80   | 18%  |
| 2006 | MT0794000 | PA SÃO<br>PEDRO/CAMBARA | 41.25  | 17.79      | 43%  | 23.47  | 57%  | 23.47  | 57%  | 4.33       | 18% | 3% | 19.14  | 46%  |
| 2006 | PA0306000 | PA PAULO FONTELES       | 8.45   | 2.84       | 34%  | 5.61   | 66%  | 5.61   | 66%  | 0.14       | 3%  | 0% | 5.47   | 65%  |
| 2006 | PA0307000 | PA ALTO BONITO          | 24.27  | 16.25      | 67%  | 8.03   | 33%  | 8.03   | 33%  | 4.10       | 51% | 7% | 3.93   | 16%  |
| 2006 | PA0308000 | PA SANTA PAULA I        | 3.52   | 3.52       | 100% | 0.00   | 0%   | 0.00   | 0%   | 0.00       |     | 0% | 0.00   | 0%   |
| 2006 | PA0309000 | PAE ILHA<br>MAMANGAL    | 24.85  | 0.48       | 2%   | 24.37  | 98%  | 24.37  | 98%  | 0.14       | 1%  | 0% | 24.23  | 98%  |
| 2006 | PA0310000 | PAE ILHA<br>URUBUOCA    | 3.12   | 0.00       | 0%   | 3.12   | 100% | 3.12   | 100% | 0.00       | 0%  | 0% | 3.12   | 100% |
| 2006 | PA0311000 | PAE ILHA LONGA          | 1.59   | 0.00       | 0%   | 1.59   | 100% | 1.59   | 100% | 0.00       | 0%  | 0% | 1.59   | 100% |
| 2006 | PA0312000 | PAE ILHA SUMAUMA        | 42.59  | 1.86       | 4%   | 40.73  | 96%  | 40.73  | 96%  | 0.13       | 0%  | 0% | 40.60  | 95%  |

|      |           |                               |        |       |     |        |      |        |      |      |     |    |        |      |
|------|-----------|-------------------------------|--------|-------|-----|--------|------|--------|------|------|-----|----|--------|------|
| 2006 | PA0313000 | P AE ILHA GRANDE -<br>PACAJAI | 345.06 | 67.71 | 20% | 277.34 | 80%  | 277.34 | 80%  | 8.98 | 3%  | 0% | 268.36 | 78%  |
| 2006 | PA0314000 | P AE ILHA BUÇU                | 3.49   | 0.07  | 2%  | 3.42   | 98%  | 3.42   | 98%  | 0.11 | 3%  | 0% | 3.31   | 95%  |
| 2006 | PA0315000 | P AE ILHA MUCURA              | 3.94   | 0.00  | 0%  | 3.94   | 100% | 3.94   | 100% | 0.00 | 0%  | 0% | 3.94   | 100% |
| 2006 | PA0316000 | P AE ILHA ARAPARI             | 27.56  | 0.41  | 1%  | 27.15  | 99%  | 27.15  | 99%  | 0.00 | 0%  | 0% | 27.15  | 99%  |
| 2006 | PA0317000 | P AE ILHA<br>MOCAJUBA         | 1.37   | 0.81  | 59% | 0.55   | 41%  | 0.55   | 41%  | 0.00 | 0%  | 0% | 0.55   | 41%  |
| 2006 | PA0318000 | PA NOVO JAUARA                | 14.32  | 12.25 | 86% | 2.07   | 14%  | 2.07   | 14%  | 0.00 | 0%  | 0% | 2.07   | 14%  |
| 2006 | PA0319000 | PA ARAXITEUA                  | 14.66  | 11.17 | 76% | 3.49   | 24%  | 3.49   | 24%  | 0.55 | 16% | 2% | 2.94   | 20%  |
| 2006 | PA0320000 | PA FLOR DE MINAS              | 26.03  | 21.98 | 84% | 4.06   | 16%  | 4.06   | 16%  | 1.26 | 31% | 4% | 2.80   | 11%  |
| 2006 | PA0321000 | P AE ILHA SÃO<br>MATEUS       | 16.85  | 0.24  | 1%  | 16.61  | 99%  | 16.61  | 99%  | 0.03 | 0%  | 0% | 16.58  | 98%  |
| 2006 | PA0322000 | P AE ILHA GRANDE<br>CAMETÁ    | 66.94  | 0.02  | 0%  | 66.92  | 100% | 66.92  | 100% | 0.00 | 0%  | 0% | 66.92  | 100% |
| 2006 | PA0323000 | P AE NOSSA<br>SENHORA DA PAZ  | 21.63  | 8.23  | 38% | 13.40  | 62%  | 13.40  | 62%  | 0.24 | 2%  | 0% | 13.16  | 61%  |
| 2006 | PA0324000 | P AE SÃO JOÃO<br>BATISTA II   | 31.80  | 7.06  | 22% | 24.74  | 78%  | 24.74  | 78%  | 0.43 | 2%  | 0% | 24.31  | 76%  |
| 2006 | PA0325000 | P AE ILHA<br>UMARITUBA        | 7.08   | 0.00  | 0%  | 7.08   | 100% | 7.08   | 100% | 0.00 | 0%  | 0% | 7.08   | 100% |
| 2006 | PA0326000 | P AE ILHA DO PAULO            | 3.46   | 0.00  | 0%  | 3.46   | 100% | 3.46   | 100% | 0.00 | 0%  | 0% | 3.46   | 100% |
| 2006 | PA0327000 | P AE ILHA DO TESO             | 10.20  | 0.00  | 0%  | 10.20  | 100% | 10.20  | 100% | 0.00 | 0%  | 0% | 10.20  | 100% |
| 2006 | PA0328000 | P AE ILHA RAQUEL              | 15.90  | 0.13  | 1%  | 15.77  | 99%  | 15.77  | 99%  | 0.00 | 0%  | 0% | 15.77  | 99%  |
| 2006 | PA0329000 | P AE ILHA CAETÉ               | 11.33  | 0.00  | 0%  | 11.33  | 100% | 11.33  | 100% | 0.00 | 0%  | 0% | 11.33  | 100% |
| 2006 | PA0330000 | P AE ILHA CUXIPIARI           | 34.98  | 0.00  | 0%  | 34.98  | 100% | 34.98  | 100% | 0.00 | 0%  | 0% | 34.98  | 100% |
| 2006 | PA0331000 | P AE ILHA JACARÉ<br>XINGU     | 8.61   | 0.00  | 0%  | 8.61   | 100% | 8.61   | 100% | 0.00 | 0%  | 0% | 8.61   | 100% |

|      |           |                                      |       |       |     |       |      |       |      |      |    |    |       |      |
|------|-----------|--------------------------------------|-------|-------|-----|-------|------|-------|------|------|----|----|-------|------|
| 2006 | PA0332000 | PAE ILHA JAITUBA                     | 6.73  | 0.00  | 0%  | 6.73  | 100% | 6.73  | 100% | 0.00 | 0% | 0% | 6.73  | 100% |
| 2006 | PA0333000 | PAE ILHA JOROCA                      | 19.38 | 0.05  | 0%  | 19.34 | 100% | 19.34 | 100% | 0.00 | 0% | 0% | 19.34 | 100% |
| 2006 | PA0334000 | PAE ILHA MANOEL<br>RAIMUNDO          | 10.66 | 0.00  | 0%  | 10.66 | 100% | 10.66 | 100% | 0.00 | 0% | 0% | 10.66 | 100% |
| 2006 | PA0337000 | PAE ILHA GAMA                        | 0.89  | 0.00  | 0%  | 0.89  | 100% | 0.89  | 100% | 0.00 | 0% | 0% | 0.89  | 100% |
| 2006 | PA0338000 | PAE ILHA GUAJARÁ                     | 3.93  | 0.00  | 0%  | 3.93  | 100% | 3.93  | 100% | 0.00 | 0% | 0% | 3.93  | 100% |
| 2006 | PA0339000 | PAE ILHA CACOAL                      | 3.31  | 0.00  | 0%  | 3.31  | 100% | 3.31  | 100% | 0.00 | 0% | 0% | 3.31  | 100% |
| 2006 | PA0340000 | PAE ILHA<br>JARACUERA                | 5.73  | 0.00  | 0%  | 5.73  | 100% | 5.73  | 100% | 0.00 | 0% | 0% | 5.73  | 100% |
| 2006 | PA0341000 | PAE ILHA MAPEUÁ                      | 3.55  | 0.00  | 0%  | 3.55  | 100% | 3.55  | 100% | 0.00 | 0% | 0% | 3.55  | 100% |
| 2006 | PA0342000 | PAE ILHA MOIRABA                     | 2.30  | 0.00  | 0%  | 2.30  | 100% | 2.30  | 100% | 0.00 | 0% | 0% | 2.30  | 100% |
| 2006 | PA0343000 | PAE ILHA<br>TABATINGA DO<br>CARAPAJÓ | 4.27  | 0.00  | 0%  | 4.27  | 100% | 4.27  | 100% | 0.00 | 0% | 0% | 4.27  | 100% |
| 2006 | PA0344000 | PAE ILHA PARURU                      | 37.24 | 0.00  | 0%  | 37.24 | 100% | 37.24 | 100% | 0.00 | 0% | 0% | 37.24 | 100% |
| 2006 | PA0345000 | PAE ILHA<br>CARIPETUBA               | 36.71 | 10.15 | 28% | 26.56 | 72%  | 26.56 | 72%  | 0.46 | 2% | 0% | 26.10 | 71%  |
| 2006 | PA0346000 | PAE ILHA URUÁ I                      | 15.79 | 0.53  | 3%  | 15.26 | 97%  | 15.26 | 97%  | 0.10 | 1% | 0% | 15.16 | 96%  |
| 2006 | PA0347000 | PAE ILHA<br>PIQUIARANA               | 7.69  | 1.45  | 19% | 6.23  | 81%  | 6.23  | 81%  | 0.00 | 0% | 0% | 6.23  | 81%  |
| 2006 | PA0348000 | PAE ILHA XIPAÍÁ                      | 12.12 | 1.96  | 16% | 10.16 | 84%  | 10.16 | 84%  | 0.00 | 0% | 0% | 10.16 | 84%  |
| 2006 | PA0349000 | PAE ILHA GRANDE<br>BELÉM             | 7.46  | 0.00  | 0%  | 7.46  | 100% | 7.46  | 100% | 0.00 | 0% | 0% | 7.46  | 100% |
| 2006 | PA0350000 | PAE ILHA JUTUBA                      | 4.53  | 0.00  | 0%  | 4.53  | 100% | 4.53  | 100% | 0.00 | 0% | 0% | 4.53  | 100% |
| 2006 | PA0351000 | PAE ILHA<br>MURUTUCU                 | 8.27  | 0.00  | 0%  | 8.27  | 100% | 8.27  | 100% | 0.00 | 0% | 0% | 8.27  | 100% |
| 2006 | PA0352000 | PAE ILHA PAQUETÁ                     | 7.21  | 0.00  | 0%  | 7.21  | 100% | 7.21  | 100% | 0.00 | 0% | 0% | 7.21  | 100% |

|      |           |                              |        |       |     |        |      |        |      |      |    |    |        |      |
|------|-----------|------------------------------|--------|-------|-----|--------|------|--------|------|------|----|----|--------|------|
| 2006 | PA0353000 | PAE ILHA SANTANA             | 45.13  | 10.30 | 23% | 34.83  | 77%  | 34.83  | 77%  | 0.10 | 0% | 0% | 34.73  | 77%  |
| 2006 | PA0354000 | PAE ILHA<br>JUPATITUBA       | 0.22   | 0.00  | 0%  | 0.22   | 100% | 0.22   | 100% | 0.00 | 0% | 0% | 0.22   | 100% |
| 2006 | PA0355000 | PAE ILHA URUÁ                | 4.33   | 0.00  | 0%  | 4.33   | 100% | 4.33   | 100% | 0.00 | 0% | 0% | 4.33   | 100% |
| 2006 | PA0356000 | PAE ILHA<br>SANTARÉM         | 41.39  | 0.00  | 0%  | 41.39  | 100% | 41.39  | 100% | 0.00 | 0% | 0% | 41.39  | 100% |
| 2006 | PA0357000 | PAE ILHA<br>CASTANHAL        | 12.33  | 0.00  | 0%  | 12.33  | 100% | 12.33  | 100% | 0.00 | 0% | 0% | 12.33  | 100% |
| 2006 | PA0358000 | PAE ILHA UNIÃO               | 6.15   | 0.00  | 0%  | 6.15   | 100% | 6.15   | 100% | 0.00 | 0% | 0% | 6.15   | 100% |
| 2006 | PA0359000 | PAE ILHA DAS<br>CINZAS       | 29.18  | 0.00  | 0%  | 29.18  | 100% | 29.18  | 100% | 0.00 | 0% | 0% | 29.18  | 100% |
| 2006 | PA0360000 | PAE ILHA PALHETA             | 3.87   | 0.13  | 3%  | 3.73   | 97%  | 3.73   | 97%  | 0.00 | 0% | 0% | 3.73   | 97%  |
| 2006 | PA0361000 | PAE ILHA DAS<br>PRACUUBINHAS | 8.07   | 0.03  | 0%  | 8.04   | 100% | 8.04   | 100% | 0.00 | 0% | 0% | 8.04   | 100% |
| 2006 | PA0362000 | PAE ILHA<br>CHIQUEIRO        | 24.70  | 0.00  | 0%  | 24.70  | 100% | 24.70  | 100% | 0.00 | 0% | 0% | 24.70  | 100% |
| 2006 | PA0363000 | PAE ILHA<br>CAMPUMPEMA       | 2.04   | 0.00  | 0%  | 2.04   | 100% | 2.04   | 100% | 0.00 | 0% | 0% | 2.04   | 100% |
| 2006 | PA0364000 | PAE ILHA URUTAÍ<br>PARTE     | 105.32 | 0.00  | 0%  | 105.32 | 100% | 105.32 | 100% | 0.00 | 0% | 0% | 105.32 | 100% |
| 2006 | PA0365000 | PAE ILHA<br>MURUMURU         | 14.34  | 0.00  | 0%  | 14.34  | 100% | 14.34  | 100% | 0.00 | 0% | 0% | 14.34  | 100% |
| 2006 | PA0366000 | PAE ILHA GOIABAL             | 11.01  | 0.00  | 0%  | 11.01  | 100% | 11.01  | 100% | 0.00 | 0% | 0% | 11.01  | 100% |
| 2006 | PA0367000 | PAE ILHA BACURI              | 20.51  | 0.00  | 0%  | 20.51  | 100% | 20.51  | 100% | 0.00 | 0% | 0% | 20.51  | 100% |
| 2006 | PA0368000 | PAE ILHA SANTO<br>AMARO      | 40.86  | 0.00  | 0%  | 40.86  | 100% | 40.86  | 100% | 0.00 | 0% | 0% | 40.86  | 100% |
| 2006 | PA0369000 | PAE ILHA                     | 5.45   | 0.46  | 9%  | 4.99   | 91%  | 4.99   | 91%  | 0.10 | 2% | 0% | 4.89   | 90%  |

| PIQUIARANA MIRIM |           |                             |        |            |     |        |      |        |      |       |     |    |        |      |
|------------------|-----------|-----------------------------|--------|------------|-----|--------|------|--------|------|-------|-----|----|--------|------|
| 2006             | PA0370000 | PA PALHETA                  | 66.38  | 59.58      | 90% | 6.79   | 10%  | 6.79   | 10%  | 1.00  | 15% | 2% | 5.79   | 9%   |
| 2006             | PA0371000 | PAE ILHA SACAJÓS<br>GRANDE  | 32.23  | 0.00       | 0%  | 32.23  | 100% | 32.23  | 100% | 0.00  | 0%  | 0% | 32.23  | 100% |
| 2006             | PA0372000 | PAE ILHA PRAIA<br>GRANDE    | 44.16  | 0.65       | 1%  | 43.52  | 99%  | 43.52  | 99%  | 0.00  | 0%  | 0% | 43.51  | 99%  |
| 2006             | PA0373000 | PAE ILHA<br>MURUJUCÁ MIRI   | 21.15  | 0.00       | 0%  | 21.15  | 100% | 21.15  | 100% | 0.06  | 0%  | 0% | 21.09  | 100% |
| 2006             | PA0374000 | PAE ILHA ATURIÁ<br>GRANDE   | 4.05   | 0.00       | 0%  | 4.05   | 100% | 4.05   | 100% | 0.00  | 0%  | 0% | 4.05   | 100% |
| 2006             | PA0375000 | PAE ILHA DAMIÃO             | 38.11  | 0.00       | 0%  | 38.11  | 100% | 38.11  | 100% | 0.00  | 0%  | 0% | 38.11  | 100% |
| 2006             | PA0376000 | PAE ILHA CAÍ<br>GRANDE      | 5.58   | 0.00       | 0%  | 5.58   | 100% | 5.58   | 100% | 0.00  | 0%  | 0% | 5.58   | 100% |
| 2006             | PA0377000 | PAE ILHA JARIMBU            | 83.48  | 0.41       | 0%  | 83.07  | 100% | 83.07  | 100% | 1.05  | 1%  | 0% | 82.02  | 98%  |
| 2006             | PA0378000 | PAE ILHA<br>PANACAUERA-MIRI | 39.42  | 1.19       | 3%  | 38.23  | 97%  | 38.23  | 97%  | 0.29  | 1%  | 0% | 37.94  | 96%  |
| 2006             | PA0379000 | PAE ILHA DO CUMBU           | 14.17  | 0.00       | 0%  | 14.17  | 100% | 14.17  | 100% | 0.04  | 0%  | 0% | 14.13  | 100% |
| 2006             | PA0380000 | PAE ILHA PAULISTA           | 15.65  | 0.01       | 0%  | 15.63  | 100% | 15.63  | 100% | 0.00  | 0%  | 0% | 15.63  | 100% |
| 2006             | PA0381000 | PAE ILHA<br>CONCEIÇÃO       | 47.12  | 0.00       | 0%  | 47.12  | 100% | 47.12  | 100% | 0.00  | 0%  | 0% | 47.12  | 100% |
| 2006             | PA0382000 | PAE ILHA MUTIRÃO            | 16.63  | 1.73       | 10% | 14.90  | 90%  | 14.90  | 90%  | 0.44  | 3%  | 0% | 14.46  | 87%  |
| 2006             | PA0383000 | PA AREIA BRANCA             | 14.25  | 11.56      | 81% | 2.69   | 19%  | 2.69   | 19%  | 0.98  | 36% | 5% | 1.71   | 12%  |
| 2006             | PA0384000 | PA LUIZ INÁCIO              | 349.43 | 130.1<br>1 | 37% | 219.32 | 63%  | 219.32 | 63%  | 75.79 | 35% | 5% | 143.53 | 41%  |
| 2006             | PA0385000 | PAE ILHA COMPRIDA           | 0.15   | 0.00       | 0%  | 0.15   | 100% | 0.15   | 100% | 0.00  | 0%  | 0% | 0.15   | 100% |
| 2006             | PA0386000 | PAE ILHA MAUBA              | 8.34   | 0.00       | 0%  | 8.34   | 100% | 8.34   | 100% | 0.12  | 1%  | 0% | 8.22   | 99%  |
| 2006             | PA0389000 | PAE ILHA ANUERÁ             | 2.14   | 0.04       | 2%  | 2.11   | 98%  | 2.11   | 98%  | 0.00  | 0%  | 0% | 2.11   | 98%  |

|      |           |                                   |        |       |     |        |      |        |      |       |     |    |        |      |
|------|-----------|-----------------------------------|--------|-------|-----|--------|------|--------|------|-------|-----|----|--------|------|
| 2006 | PA0390000 | PAE ILHA DE MELGAÇO               | 117.79 | 13.02 | 11% | 104.76 | 89%  | 104.76 | 89%  | 0.36  | 0%  | 0% | 104.40 | 89%  |
| 2006 | PA0391000 | PAE ILHA MUJIRUM                  | 151.71 | 1.49  | 1%  | 150.22 | 99%  | 150.22 | 99%  | 0.38  | 0%  | 0% | 149.84 | 99%  |
| 2006 | PA0394000 | PAE TRÊS IRMÃS                    | 5.18   | 0.00  | 0%  | 5.18   | 100% | 5.18   | 100% | 0.00  | 0%  | 0% | 5.18   | 100% |
| 2006 | PA0395000 | PAE ILHA COROA NOVA               | 6.71   | 0.00  | 0%  | 6.71   | 100% | 6.71   | 100% | 0.00  | 0%  | 0% | 6.71   | 100% |
| 2006 | PA0396000 | PAE ILHA MARINTEUA                | 3.47   | 0.03  | 1%  | 3.43   | 99%  | 3.43   | 99%  | 0.00  | 0%  | 0% | 3.43   | 99%  |
| 2006 | PA0397000 | PAE ILHA PACUÍ                    | 7.60   | 0.00  | 0%  | 7.60   | 100% | 7.60   | 100% | 0.00  | 0%  | 0% | 7.60   | 100% |
| 2006 | PA0398000 | PAE ILHA ITANDUBA                 | 7.81   | 0.00  | 0%  | 7.81   | 100% | 7.81   | 100% | 0.00  | 0%  | 0% | 7.81   | 100% |
| 2006 | PA0399000 | PAE ILHA ITAUNA                   | 7.55   | 0.00  | 0%  | 7.55   | 100% | 7.55   | 100% | 0.00  | 0%  | 0% | 7.55   | 100% |
| 2006 | PA0400000 | PAE ILHA AJARAÍ                   | 3.45   | 0.00  | 0%  | 3.45   | 100% | 3.45   | 100% | 0.00  | 0%  | 0% | 3.45   | 100% |
| 2006 | PA0401000 | PAE ILHA SANTANA DE CAMETÁ        | 25.47  | 0.00  | 0%  | 25.47  | 100% | 25.47  | 100% | 0.00  | 0%  | 0% | 25.47  | 100% |
| 2006 | PA0402000 | PA NOVA VIDA                      | 40.69  | 8.63  | 21% | 32.06  | 79%  | 32.06  | 79%  | 11.36 | 35% | 5% | 20.70  | 51%  |
| 2006 | PA0403000 | PA GLEBINHA                       | 17.60  | 3.90  | 22% | 13.70  | 78%  | 13.70  | 78%  | 3.19  | 23% | 3% | 10.51  | 60%  |
| 2006 | PA0405000 | PAE ILHA JUPATITUBA DE CURRALINHO | 106.31 | 6.50  | 6%  | 99.81  | 94%  | 99.81  | 94%  | 0.16  | 0%  | 0% | 99.65  | 94%  |
| 2006 | PA0406000 | PAE ILHA CANATICU                 | 11.23  | 0.00  | 0%  | 11.23  | 100% | 11.23  | 100% | 0.00  | 0%  | 0% | 11.23  | 100% |
| 2006 | PA0407000 | PAE ILHA DO MUTUM                 | 42.72  | 0.05  | 0%  | 42.67  | 100% | 42.67  | 100% | 0.00  | 0%  | 0% | 42.67  | 100% |
| 2006 | PA0408000 | PAE ILHA DO FURO GRANDE           | 13.18  | 0.06  | 0%  | 13.11  | 100% | 13.11  | 100% | 0.00  | 0%  | 0% | 13.11  | 100% |
| 2006 | PA0409000 | PAE ILHA ITABOCA                  | 22.33  | 0.08  | 0%  | 22.25  | 100% | 22.25  | 100% | 0.00  | 0%  | 0% | 22.25  | 100% |
| 2006 | PA0410000 | PAE ILHA PINDOBAL GRANDE          | 37.31  | 0.05  | 0%  | 37.26  | 100% | 37.26  | 100% | 0.38  | 1%  | 0% | 36.89  | 99%  |

|      |           |                                           |        |       |     |        |      |        |      |      |     |    |        |      |
|------|-----------|-------------------------------------------|--------|-------|-----|--------|------|--------|------|------|-----|----|--------|------|
| 2006 | PA0411000 | PA JUTAÍ MIRIM                            | 21.92  | 16.99 | 77% | 4.93   | 23%  | 4.93   | 23%  | 0.36 | 7%  | 1% | 4.58   | 21%  |
| 2006 | PA0412000 | PAE ILHA COROCA                           | 18.53  | 0.00  | 0%  | 18.53  | 100% | 18.53  | 100% | 0.00 | 0%  | 0% | 18.53  | 100% |
| 2006 | PA0413000 | PAE ILHA PAQUETÁ<br>II                    | 6.76   | 0.00  | 0%  | 6.76   | 100% | 6.76   | 100% | 0.00 | 0%  | 0% | 6.76   | 100% |
| 2006 | PA0414000 | PAE ILHA BOA VISTA                        | 9.24   | 0.13  | 1%  | 9.12   | 99%  | 9.12   | 99%  | 0.00 | 0%  | 0% | 9.11   | 99%  |
| 2006 | PA0415000 | PAE ILHA CHAVES                           | 8.82   | 0.00  | 0%  | 8.82   | 100% | 8.82   | 100% | 0.00 | 0%  | 0% | 8.82   | 100% |
| 2006 | PA0416000 | PAE ILHA LARANJA                          | 15.37  | 0.13  | 1%  | 15.24  | 99%  | 15.24  | 99%  | 0.08 | 1%  | 0% | 15.15  | 99%  |
| 2006 | PA0417000 | PAE ILHA SÃO JOÃO                         | 7.86   | 0.00  | 0%  | 7.86   | 100% | 7.86   | 100% | 0.00 | 0%  | 0% | 7.86   | 100% |
| 2006 | PA0418000 | PAE ILHA TUCUPI<br>GRANDE                 | 14.29  | 0.00  | 0%  | 14.29  | 100% | 14.29  | 100% | 0.00 | 0%  | 0% | 14.29  | 100% |
| 2006 | PA0419000 | PAE ILHA SANTO<br>ANTÔNIO III             | 12.77  | 0.00  | 0%  | 12.77  | 100% | 12.77  | 100% | 0.00 | 0%  | 0% | 12.77  | 100% |
| 2006 | RO0161000 | PA PAULO FREIRE                           | 18.65  | 7.32  | 39% | 11.33  | 61%  | 11.33  | 61%  | 5.56 | 49% | 7% | 5.77   | 31%  |
| 2006 | RO0162000 | PA ANTONIO<br>CONSELHEIRO<br>PDS ROLIM DE | 9.57   | 1.55  | 16% | 8.03   | 84%  | 8.03   | 84%  | 3.57 | 44% | 6% | 4.46   | 47%  |
| 2006 | RO0164000 | MOURA DO<br>GUAPORÉ                       | 18.30  | 6.71  | 37% | 11.59  | 63%  | 11.59  | 63%  | 1.55 | 13% | 2% | 10.04  | 55%  |
| 2006 | RO0165000 | PA BOA ESPERANÇA                          | 3.17   | 2.52  | 80% | 0.64   | 20%  | 0.64   | 20%  | 0.32 | 49% | 7% | 0.33   | 10%  |
| 2006 | RO0166000 | PA RIO SÃO PEDRO                          | 19.08  | 11.39 | 60% | 7.68   | 40%  | 7.68   | 40%  | 1.22 | 16% | 2% | 6.47   | 34%  |
| 2006 | RR0049000 | PA RENASCER                               | 4.51   | 0.71  | 16% | 3.80   | 84%  | 3.80   | 84%  | 0.09 | 2%  | 0% | 3.71   | 82%  |
| 2006 | RR0051000 | PA PAU- BRASIL                            | 251.41 | 0.42  | 0%  | 250.99 | 100% | 250.99 | 100% | 0.27 | 0%  | 0% | 250.72 | 100% |
| 2006 | RR0052000 | PA TERRA NOVA                             | 34.35  | 8.61  | 25% | 25.74  | 75%  | 25.74  | 75%  | 4.05 | 16% | 2% | 21.70  | 63%  |
| 2006 | RR0053000 | PA SERRA TALHADA                          | 32.49  | 1.95  | 6%  | 30.54  | 94%  | 30.54  | 94%  | 5.03 | 16% | 2% | 25.51  | 79%  |
| 2006 | RR0054000 | PA ARCO-ÍRIS                              | 146.04 | 0.11  | 0%  | 145.94 | 100% | 145.94 | 100% | 3.38 | 2%  | 0% | 142.56 | 98%  |
| 2006 | SM0150000 | PDS NELSON DE<br>OLIVEIRA                 | 45.34  | 3.18  | 7%  | 42.16  | 93%  | 42.16  | 93%  | 5.72 | 14% | 2% | 36.44  | 80%  |

|      |           |                                    |         |            |      |          |      |          |      |            |     |    |          |      |
|------|-----------|------------------------------------|---------|------------|------|----------|------|----------|------|------------|-----|----|----------|------|
| 2006 | SM0151000 | PDS TERRA NOSSA                    | 1473.33 | 195.2<br>2 | 13%  | 1,278.11 | 87%  | 1,278.11 | 87%  | 205.4<br>2 | 16% | 2% | 1,072.69 | 73%  |
| 2006 | SM0153000 | PAE REGIÃO DO<br>CUÇARI            | 287.24  | 70.18      | 24%  | 217.05   | 76%  | 217.05   | 76%  | 26.91      | 12% | 2% | 190.15   | 66%  |
| 2006 | SM0154000 | PDS MÁRIO BRAULE<br>PINTO DA SILVA | 70.14   | 0.00       | 0%   | 70.14    | 100% | 70.14    | 100% | 0.00       | 0%  | 0% | 70.14    | 100% |
| 2006 | SM0155000 | PDS ESPERANÇA DO<br>TRAIRÃO        | 247.95  | 44.43      | 18%  | 203.52   | 82%  | 203.52   | 82%  | 16.57      | 8%  | 1% | 186.95   | 75%  |
| 2006 | SM0156000 | PDS NOVA UNIÃO                     | 116.44  | 74.79      | 64%  | 41.65    | 36%  | 41.65    | 36%  | 3.40       | 8%  | 1% | 38.25    | 33%  |
| 2006 | SM0157000 | PA ARIXI                           | 57.56   | 9.62       | 17%  | 47.94    | 83%  | 47.94    | 83%  | 1.43       | 3%  | 0% | 46.51    | 81%  |
| 2006 | SM0162000 | PAE CUÇARU                         | 7.93    | 4.21       | 53%  | 3.72     | 47%  | 3.72     | 47%  | 0.26       | 7%  | 1% | 3.46     | 44%  |
| 2006 | SM0165000 | PAE NAZARÉ                         | 14.85   | 9.92       | 67%  | 4.93     | 33%  | 4.93     | 33%  | 0.59       | 12% | 2% | 4.34     | 29%  |
| 2006 | SM0167000 | PAE IGARAPE DO<br>CUÇARI           | 0.08    | 0.00       | 0%   | 0.08     | 100% | 0.08     | 100% | 0.00       | 0%  | 0% | 0.08     | 100% |
| 2006 | SM0169000 | PAE COSTA DO<br>AMAZONAS           | 0.55    | 0.29       | 52%  | 0.26     | 48%  | 0.26     | 48%  | 0.13       | 50% | 7% | 0.13     | 24%  |
| 2006 | SM0170000 | PAE ARITAPERA                      | 0.04    | 0.00       | 0%   | 0.04     | 100% | 0.04     | 100% | 0.00       | 0%  | 0% | 0.04     | 100% |
| 2006 | SM0171000 | PA ANAPUZINHO                      | 181.39  | 71.21      | 39%  | 110.18   | 61%  | 110.18   | 61%  | 17.69      | 16% | 2% | 92.49    | 51%  |
| 2006 | SM0172000 | PDS SANTA CLARA                    | 241.77  | 4.75       | 2%   | 237.02   | 98%  | 237.02   | 98%  | 3.08       | 1%  | 0% | 233.94   | 97%  |
| 2006 | SM0174000 | PAE SÃO DIOGO                      | 0.82    | 0.82       | 100% | 0.00     | 0%   | 0.00     | 0%   | 0.00       |     | 0% | 0.00     | 0%   |
| 2006 | SM0175000 | PDS LIBERDADE I                    | 4513.92 | 87.13      | 2%   | 4,426.79 | 98%  | 4,426.79 | 98%  | 69.37      | 2%  | 0% | 4,357.43 | 97%  |
| 2006 | SM0177000 | PDS HORIZONTE<br>NOVO              | 216.41  | 5.04       | 2%   | 211.38   | 98%  | 211.38   | 98%  | 9.46       | 4%  | 1% | 201.92   | 93%  |
| 2006 | SM0180000 | PAE ATUMÃ                          | 0.06    | 0.00       | 0%   | 0.06     | 100% | 0.06     | 100% | 0.00       | 0%  | 0% | 0.06     | 100% |
| 2006 | SM0181000 | PA MACANÃ I                        | 261.02  | 10.10      | 4%   | 250.92   | 96%  | 250.92   | 96%  | 24.75      | 10% | 1% | 226.18   | 87%  |
| 2006 | SM0182000 | PA MACANÃ II                       | 314.12  | 9.77       | 3%   | 304.35   | 97%  | 304.35   | 97%  | 18.40      | 6%  | 1% | 285.95   | 91%  |
| 2006 | SM0183000 | PDS ITATA                          | 1052.85 | 0.63       | 0%   | 1,052.22 | 100% | 1,052.22 | 100% | 56.70      | 5%  | 1% | 995.53   | 95%  |



|      |           |                            |        |        |     |        |     |        |     |       |     |    |        |     |
|------|-----------|----------------------------|--------|--------|-----|--------|-----|--------|-----|-------|-----|----|--------|-----|
| 2006 | SM0186000 | PAE TAPARÁ                 | 10.25  | 2.60   | 25% | 7.65   | 75% | 7.65   | 75% | 0.18  | 2%  | 0% | 7.47   | 73% |
| 2006 | SM0187000 | PAC ARAIPACUPU             | 302.35 | 161.07 | 53% | 141.28 | 47% | 141.28 | 47% | 10.08 | 7%  | 1% | 131.20 | 43% |
| 2006 | SM0188000 | PDS NOVA BRASILIA II       | 56.96  | 9.75   | 17% | 47.22  | 83% | 47.22  | 83% | 3.12  | 7%  | 1% | 44.09  | 77% |
| 2006 | SM0189000 | PA NOSSA SENHORA DE FATIMA | 42.40  | 4.85   | 11% | 37.55  | 89% | 37.55  | 89% | 5.84  | 16% | 2% | 31.71  | 75% |
| 2006 | SM0190000 | PA RIO CIGANO              | 22.00  | 5.23   | 24% | 16.78  | 76% | 16.78  | 76% | 2.71  | 16% | 2% | 14.06  | 64% |
| 2006 | SM0191000 | PDS ÁGUA AZUL              | 296.93 | 47.70  | 16% | 249.23 | 84% | 249.23 | 84% | 20.08 | 8%  | 1% | 229.15 | 77% |
| 2006 | SM0192000 | PDS BOA VISTA DO CARACOL   | 227.54 | 15.43  | 7%  | 212.11 | 93% | 212.11 | 93% | 16.52 | 8%  | 1% | 195.59 | 86% |
| 2006 | SM0193000 | PAC NOVA ALTAMIRA          | 18.30  | 14.98  | 82% | 3.32   | 18% | 3.32   | 18% | 0.00  | 0%  | 0% | 3.32   | 18% |
| 2006 | SM0194000 | PAC CAUÃU B E BALANÇA      | 24.39  | 17.03  | 70% | 7.36   | 30% | 7.36   | 30% | 0.31  | 4%  | 1% | 7.05   | 29% |
| 2006 | SM0197000 | PAE MARIA TEREZA           | 1.65   | 0.27   | 16% | 1.38   | 84% | 1.38   | 84% | 0.00  | 0%  | 0% | 1.38   | 84% |
| 2006 | SM0203000 | PAE PAITUNA                | 1.51   | 1.08   | 72% | 0.43   | 28% | 0.43   | 28% | 0.00  | 0%  | 0% | 0.43   | 28% |
| 2006 | SM0204000 | PAE REGIAO DOS LAGOS       | 7.22   | 4.81   | 67% | 2.42   | 33% | 2.42   | 33% | 0.31  | 13% | 2% | 2.10   | 29% |
| 2006 | SM0206000 | PAC BELA TERRA I           | 108.55 | 55.99  | 52% | 52.56  | 48% | 52.56  | 48% | 5.15  | 10% | 1% | 47.41  | 44% |
| 2006 | SM0207000 | PAC BELA TERRA II          | 109.94 | 81.12  | 74% | 28.81  | 26% | 28.81  | 26% | 1.89  | 7%  | 1% | 26.92  | 24% |
| 2006 | SM0208000 | PDS ARTHUR FALEIRO         | 227.10 | 9.24   | 4%  | 217.86 | 96% | 217.86 | 96% | 10.22 | 5%  | 1% | 207.64 | 91% |
| 2006 | SM0209000 | PDS AVELINO RIBEIRO        | 216.62 | 6.32   | 3%  | 210.29 | 97% | 210.29 | 97% | 6.46  | 3%  | 0% | 203.83 | 94% |
| 2006 | SM0213000 | PAE SALÉ                   | 13.64  | 9.99   | 73% | 3.65   | 27% | 3.65   | 27% | 0.15  | 4%  | 1% | 3.50   | 26% |
| 2006 | SM0214000 | PAE BALAIO                 | 3.83   | 3.32   | 87% | 0.50   | 13% | 0.50   | 13% | 0.10  | 20% | 3% | 0.40   | 11% |

|      |           |                               |         |            |     |          |     |          |     |       |     |    |        |     |
|------|-----------|-------------------------------|---------|------------|-----|----------|-----|----------|-----|-------|-----|----|--------|-----|
| 2006 | SM0215000 | PDS MÃE<br>MENININHA          | 188.28  | 14.15      | 8%  | 174.13   | 92% | 174.13   | 92% | 24.09 | 14% | 2% | 150.04 | 80% |
| 2006 | SM0216000 | PDS ESPERANÇA                 | 180.10  | 12.16      | 7%  | 167.94   | 93% | 167.94   | 93% | 8.05  | 5%  | 1% | 159.89 | 89% |
| 2006 | SM0217000 | PA ESPERANÇA                  | 144.74  | 57.82      | 40% | 86.93    | 60% | 86.93    | 60% | 22.84 | 26% | 4% | 64.09  | 44% |
| 2006 | SM0218000 | PAC ANANIZAL                  | 24.48   | 9.36       | 38% | 15.12    | 62% | 15.12    | 62% | 0.91  | 6%  | 1% | 14.22  | 58% |
| 2006 | SM0219000 | PAC ITAPECURU                 | 47.22   | 15.87      | 34% | 31.35    | 66% | 31.35    | 66% | 2.62  | 8%  | 1% | 28.73  | 61% |
| 2006 | SM0220000 | PAC IRIPIXI                   | 24.33   | 13.60      | 56% | 10.72    | 44% | 10.72    | 44% | 0.19  | 2%  | 0% | 10.54  | 43% |
| 2006 | SM0221000 | PAC MONTE MURIA               | 48.53   | 13.95      | 29% | 34.58    | 71% | 34.58    | 71% | 6.92  | 20% | 3% | 27.66  | 57% |
| 2006 | SM0222000 | PAE ARAMANAÍ                  | 33.32   | 17.17      | 52% | 16.15    | 48% | 16.15    | 48% | 1.68  | 10% | 1% | 14.47  | 43% |
| 2006 | SM0223000 | PAE PINDOBAL                  | 80.47   | 16.25      | 20% | 64.22    | 80% | 64.22    | 80% | 0.14  | 0%  | 0% | 64.08  | 80% |
| 2006 | SM0225000 | PAE CACHOERY                  | 0.93    | 0.06       | 7%  | 0.87     | 93% | 0.87     | 93% | 0.00  | 0%  | 0% | 0.87   | 93% |
| 2006 | SM0226000 | PAE ITUQUI                    | 43.27   | 28.02      | 65% | 15.24    | 35% | 15.24    | 35% | 1.91  | 13% | 2% | 13.34  | 31% |
| 2006 | SM0227000 | PAE CHICANTÃ                  | 1.96    | 0.54       | 27% | 1.42     | 73% | 1.42     | 73% | 0.17  | 12% | 2% | 1.25   | 64% |
| 2006 | SM0230000 | PAE JACARECAPÁ                | 11.85   | 9.23       | 78% | 2.62     | 22% | 2.62     | 22% | 0.22  | 8%  | 1% | 2.40   | 20% |
| 2006 | SM0231000 | PAE JAQUARÁ                   | 18.24   | 15.15      | 83% | 3.09     | 17% | 3.09     | 17% | 0.18  | 6%  | 1% | 2.91   | 16% |
| 2006 | SM0232000 | PAE ALDEIA                    | 26.42   | 22.58      | 85% | 3.84     | 15% | 3.84     | 15% | 0.72  | 19% | 3% | 3.13   | 12% |
| 2006 | SM0233000 | PAC BOM SOSSEGO               | 868.60  | 247.7<br>7 | 29% | 620.83   | 71% | 620.83   | 71% | 32.61 | 5%  | 1% | 588.22 | 68% |
| 2006 | SM0234000 | PA PARAISO DO<br>NORTE        | 1129.70 | 106.7<br>4 | 9%  | 1,022.95 | 91% | 1,022.95 | 91% | 47.08 | 5%  | 1% | 975.87 | 86% |
| 2006 | SM0235000 | PAC SÃO SEBASTIÃO<br>DO TUTUÍ | 398.27  | 5.00       | 1%  | 393.27   | 99% | 393.27   | 99% | 12.63 | 3%  | 0% | 380.64 | 96% |
| 2006 | SM0236000 | PAC NOVA UNIÃO                | 316.02  | 22.73      | 7%  | 293.29   | 93% | 293.29   | 93% | 15.24 | 5%  | 1% | 278.05 | 88% |
| 2006 | SM0237000 | PDS OURO BRANCO               | 545.77  | 42.04      | 8%  | 503.72   | 92% | 503.72   | 92% | 17.69 | 4%  | 1% | 486.03 | 89% |
| 2006 | SM0238000 | PAC OURO BRANCO I             | 398.07  | 21.90      | 6%  | 376.17   | 94% | 376.17   | 94% | 17.65 | 5%  | 1% | 358.52 | 90% |
| 2006 | SM0239000 | PAC OURO BRANCO<br>II         | 369.93  | 10.35      | 3%  | 359.58   | 97% | 359.58   | 97% | 14.99 | 4%  | 1% | 344.59 | 93% |

|      |           |                                |         |       |      |          |      |          |      |       |     |    |          |      |
|------|-----------|--------------------------------|---------|-------|------|----------|------|----------|------|-------|-----|----|----------|------|
| 2006 | SM0241000 | PDS LARANJAL                   | 340.48  | 10.80 | 3%   | 329.68   | 97%  | 329.68   | 97%  | 12.90 | 4%  | 1% | 316.78   | 93%  |
| 2006 | SM0242000 | PDS PIMENTAL                   | 62.27   | 12.47 | 20%  | 49.80    | 80%  | 49.80    | 80%  | 3.09  | 6%  | 1% | 46.72    | 75%  |
| 2006 | SM0246000 | PDS IRMÃ DOROTY                | 305.08  | 17.63 | 6%   | 287.45   | 94%  | 287.45   | 94%  | 8.06  | 3%  | 0% | 279.39   | 92%  |
| 2006 | TO0386000 | PA SANTA HELENA II             | 14.53   | 11.45 | 79%  | 3.08     | 21%  | 3.08     | 21%  | 0.07  | 2%  | 0% | 3.02     | 21%  |
| 2007 | AC0141000 | PDS FLORESTA                   | 63.90   | 27.38 | 43%  | 36.53    | 57%  | 36.53    | 57%  | 3.67  | 10% | 2% | 32.86    | 51%  |
| 2007 | AM0086000 | PDS GEDEÃO                     | 113.26  | 4.54  | 4%   | 108.73   | 96%  | 108.73   | 96%  | 12.18 | 11% | 2% | 96.55    | 85%  |
| 2007 | AM0089000 | PAE URUPIARA                   | 397.45  | 15.04 | 4%   | 382.41   | 96%  | 382.41   | 96%  | 1.09  | 0%  | 0% | 381.33   | 96%  |
| 2007 | AM0090000 | PAE SANTA FÉ                   | 38.34   | 0.84  | 2%   | 37.51    | 98%  | 37.51    | 98%  | 0.07  | 0%  | 0% | 37.44    | 98%  |
| 2007 | AM0091000 | PAE SÃO JOAQUIM                | 1484.28 | 13.45 | 1%   | 1,470.83 | 99%  | 1,470.83 | 99%  | 0.51  | 0%  | 0% | 1,470.32 | 99%  |
| 2007 | AM0092000 | PAE FLORESTA DO<br>IPIXUNA     | 290.50  | 2.16  | 1%   | 288.34   | 99%  | 288.34   | 99%  | 0.21  | 0%  | 0% | 288.13   | 99%  |
| 2007 | AM0093000 | PAE TUPANA IGAPÓ<br>AÇU II     | 4483.25 | 5.50  | 0%   | 4,477.74 | 100% | 4,477.74 | 100% | 0.20  | 0%  | 0% | 4,477.55 | 100% |
| 2007 | AM0099000 | PAE NOVO ORIENTE               | 185.25  | 0.90  | 0%   | 184.35   | 100% | 184.35   | 100% | 9.74  | 5%  | 1% | 174.61   | 94%  |
| 2007 | AM0101000 | PAE RIO AÇUÃ                   | 131.94  | 4.58  | 3%   | 127.36   | 97%  | 127.36   | 97%  | 4.95  | 4%  | 1% | 122.42   | 93%  |
| 2007 | AM0103000 | PDS REALIDADE                  | 434.67  | 3.11  | 1%   | 431.57   | 99%  | 431.57   | 99%  | 2.97  | 1%  | 0% | 428.60   | 99%  |
| 2007 | AM0106000 | PAE SANTA MARIA<br>AUXILIADORA | 347.44  | 3.17  | 1%   | 344.27   | 99%  | 344.27   | 99%  | 0.43  | 0%  | 0% | 343.84   | 99%  |
| 2007 | AM0108000 | PAE ILHA DO<br>ARAMAÇA         | 82.98   | 1.94  | 2%   | 81.04    | 98%  | 81.04    | 98%  | 0.19  | 0%  | 0% | 80.84    | 97%  |
| 2007 | AM0109000 | PAE ANUMAÃ                     | 226.31  | 18.82 | 8%   | 207.50   | 92%  | 207.50   | 92%  | 3.26  | 2%  | 0% | 204.24   | 90%  |
| 2007 | AM0119000 | PDS RIO TACANA                 | 34.98   | 2.52  | 7%   | 32.46    | 93%  | 32.46    | 93%  | 1.17  | 4%  | 1% | 31.30    | 89%  |
| 2007 | AM0120000 | PDS SAMAUMA                    | 360.25  | 3.77  | 1%   | 356.48   | 99%  | 356.48   | 99%  | 3.03  | 1%  | 0% | 353.45   | 98%  |
| 2007 | AM0121000 | PDS PRIMAVERA                  | 184.92  | 1.36  | 1%   | 183.57   | 99%  | 183.57   | 99%  | 0.28  | 0%  | 0% | 183.28   | 99%  |
| 2007 | AM0123000 | PCA SÃO PAULO DE<br>OLIVENÇA   | 28.37   | 8.13  | 29%  | 20.24    | 71%  | 20.24    | 71%  | 0.00  | 0%  | 0% | 20.24    | 71%  |
| 2007 | MA0758000 | PA JEOVAH                      | 31.75   | 31.75 | 100% | 0.00     | 0%   | 0.00     | 0%   | 0.00  | 0%  | 0% | 0.00     | 0%   |

|      |           |                               |        |            |      |        |     |        |     |       |     |      |        |     |
|------|-----------|-------------------------------|--------|------------|------|--------|-----|--------|-----|-------|-----|------|--------|-----|
| 2007 | MA0768000 | PA SÃO JOSÉ /<br>SATUBINHA    | 6.26   | 6.26       | 100% | 0.00   | 0%  | 0.00   | 0%  | 0.00  | 0%  | 0.00 | 0%     |     |
| 2007 | MA0771000 | PA PADRE PAULO                | 37.18  | 35.06      | 94%  | 2.12   | 6%  | 2.12   | 6%  | 0.09  | 4%  | 1%   | 2.03   | 5%  |
| 2007 | MA0772000 | PA LAGOA DOS<br>PATOS         | 17.13  | 8.89       | 52%  | 8.24   | 48% | 8.24   | 48% | 2.00  | 24% | 4%   | 6.24   | 36% |
| 2007 | MA0773000 | PA DALBAM                     | 24.72  | 24.72      | 100% | 0.00   | 0%  | 0.00   | 0%  | 0.00  | 0%  | 0%   | 0.00   | 0%  |
| 2007 | MA0945000 | PA VILA NOVA /<br>ÁGUA BRANCA | 1.47   | 0.01       | 1%   | 1.46   | 99% | 1.46   | 99% | 0.14  | 10% | 2%   | 1.32   | 90% |
| 2007 | MB0497000 | PA RECANTO DA<br>IARA         | 3.77   | 1.81       | 48%  | 1.97   | 52% | 1.97   | 52% | 0.38  | 19% | 3%   | 1.59   | 42% |
| 2007 | MB0499000 | PA ANTONIO<br>NONATO          | 45.74  | 13.81      | 30%  | 31.93  | 70% | 31.93  | 70% | 9.57  | 30% | 5%   | 22.36  | 49% |
| 2007 | MB0500000 | PA UNIÃO DA<br>VITÓRIA        | 10.12  | 5.05       | 50%  | 5.07   | 50% | 5.07   | 50% | 0.94  | 19% | 3%   | 4.12   | 41% |
| 2007 | MB0503000 | PA PROGRESSO                  | 14.59  | 12.47      | 85%  | 2.12   | 15% | 2.12   | 15% | 1.15  | 54% | 9%   | 0.97   | 7%  |
| 2007 | MB0504000 | PA BARRA MANSA                | 157.22 | 50.53      | 32%  | 106.69 | 68% | 106.69 | 68% | 23.67 | 22% | 4%   | 83.02  | 53% |
| 2007 | MT0807000 | PA ZUMBI DOS<br>PALMARES II   | 65.13  | 26.26      | 40%  | 38.87  | 60% | 38.87  | 60% | 10.98 | 28% | 5%   | 27.90  | 43% |
| 2007 | MT0815000 | PA BRIDÃO<br>BRASILEIRO       | 187.15 | 76.97      | 41%  | 110.18 | 59% | 110.18 | 59% | 60.88 | 55% | 9%   | 49.29  | 26% |
| 2007 | MT0816000 | PA MIURA                      | 26.05  | 15.86      | 61%  | 10.19  | 39% | 10.19  | 39% | 0.08  | 1%  | 0%   | 10.11  | 39% |
| 2007 | MT0817000 | PA BARRA DO<br>MARCO          | 7.76   | 5.03       | 65%  | 2.73   | 35% | 2.73   | 35% | 0.00  | 0%  | 0%   | 2.73   | 35% |
| 2007 | MT0818000 | PA MEDALHA<br>MILAGROSA       | 278.41 | 143.3<br>0 | 51%  | 135.11 | 49% | 135.11 | 49% | 36.26 | 27% | 4%   | 98.85  | 36% |
| 2007 | MT0824000 | PDS OLGA BENARIO              | 14.57  | 3.97       | 27%  | 10.60  | 73% | 10.60  | 73% | 0.46  | 4%  | 1%   | 10.14  | 70% |
| 2007 | MT0827000 | PA JAPURANOMANN               | 287.24 | 131.2      | 46%  | 155.95 | 54% | 155.95 | 54% | 11.56 | 7%  | 1%   | 144.39 | 50% |

|      |           |                                             |         |        |      |          |     |          |     |       |     |     |          |     |
|------|-----------|---------------------------------------------|---------|--------|------|----------|-----|----------|-----|-------|-----|-----|----------|-----|
|      |           |                                             |         | 9      |      |          |     |          |     |       |     |     |          |     |
| 2007 | PA0430000 | PA PATAUATEUA                               | 27.57   | 24.08  | 87%  | 3.49     | 13% | 3.49     | 13% | 0.00  | 0%  | 0%  | 3.49     | 13% |
| 2007 | RO0163000 | PAF JEQUITIBÁ                               | 1371.86 | 148.37 | 11%  | 1,223.48 | 89% | 1,223.48 | 89% | 40.34 | 3%  | 1%  | 1,183.14 | 86% |
| 2007 | RO0167000 | PA LAMARQUINHA                              | 4.92    | 1.55   | 32%  | 3.37     | 68% | 3.37     | 68% | 2.50  | 74% | 12% | 0.86     | 18% |
| 2007 | RO0168000 | PDS DOM XAVIER<br>REY                       | 35.13   | 2.12   | 6%   | 33.02    | 94% | 33.02    | 94% | 0.02  | 0%  | 0%  | 33.00    | 94% |
| 2007 | RO0170000 | PA NOVO<br>PROGRESSO                        | 4.54    | 4.04   | 89%  | 0.50     | 11% | 0.50     | 11% | 0.00  | 0%  | 0%  | 0.50     | 11% |
| 2007 | RO0171000 | PA LAMARCA                                  | 10.17   | 3.90   | 38%  | 6.27     | 62% | 6.27     | 62% | 4.09  | 65% | 11% | 2.18     | 21% |
| 2007 | RR0055000 | PA TALISMÃ                                  | 23.07   | 0.42   | 2%   | 22.65    | 98% | 22.65    | 98% | 0.91  | 4%  | 1%  | 21.74    | 94% |
| 2007 | RR0056000 | PA NOVA FLORESTA                            | 84.49   | 0.89   | 1%   | 83.61    | 99% | 83.61    | 99% | 5.60  | 7%  | 1%  | 78.00    | 92% |
| 2007 | TO0413000 | PA PALMARES                                 | 19.14   | 19.14  | 100% | 0.00     | 0%  | 0.00     | 0%  | 0.00  |     | 0%  | 0.00     | 0%  |
| 2007 | TO0418000 | PA MATA AZUL I                              | 42.61   | 42.14  | 99%  | 0.47     | 1%  | 0.47     | 1%  | 0.00  | 0%  | 0%  | 0.47     | 1%  |
| 2007 | TO0425000 | PA CORUJA                                   | 0.31    | 0.31   | 100% | 0.00     | 0%  | 0.00     | 0%  | 0.00  |     |     | 0.00     | 0%  |
| 2008 | AC0148000 | PA BARRO ALTO                               | 58.84   | 28.44  | 48%  | 30.40    | 52% | 30.40    | 52% | 2.67  | 9%  | 2%  | 27.73    | 47% |
| 2008 | MA0782000 | PA MANGAUBA                                 | 2.99    | 1.51   | 51%  | 1.47     | 49% | 1.47     | 49% | 0.14  | 9%  | 2%  | 1.33     | 45% |
| 2008 | MA0783000 | PA<br>CIGANA/BARRIGUDO<br>/COLONE<br>PA SÃO | 1.69    | 1.44   | 85%  | 0.25     | 15% | 0.25     | 15% | 0.00  | 0%  | 0%  | 0.25     | 15% |
| 2008 | MA1030000 | FRANCISCO/BOA<br>VIAGEM                     | 12.22   | 8.21   | 67%  | 4.01     | 33% | 4.01     | 33% | 1.15  | 29% | 6%  | 2.87     | 23% |
| 2008 | MA1031000 | PA RENASCER                                 | 6.13    | 1.40   | 23%  | 4.73     | 77% | 4.73     | 77% | 0.06  | 1%  | 0%  | 4.67     | 76% |
| 2008 | AM0131000 | PAF RIO IÇÁ                                 | 473.74  | 4.80   | 1%   | 468.94   | 99% | 468.94   | 99% | 0.07  | 0%  | 0%  | 468.87   | 99% |
| 2008 | MA1032000 | PA HORIZONTE AZUL                           | 19.40   | 3.02   | 16%  | 16.38    | 84% | 16.38    | 84% | 0.55  | 3%  | 1%  | 15.83    | 82% |
| 2008 | MA1042000 | PA                                          | 2.29    | 2.29   | 100% | 0.00     | 0%  | 0.00     | 0%  | 0.00  |     | 0%  | 0.00     | 0%  |

CRISTALINA/COLON  
E

|      |           |                           |        |       |      |       |     |       |     |       |     |     |       |     |
|------|-----------|---------------------------|--------|-------|------|-------|-----|-------|-----|-------|-----|-----|-------|-----|
| 2008 | MB0505000 | PA 26 DE MARÇO            | 101.82 | 79.25 | 78%  | 22.57 | 22% | 22.57 | 22% | 2.98  | 13% | 3%  | 19.59 | 19% |
| 2008 | PA0458000 | PA RIO BUJARU             | 80.62  | 71.77 | 89%  | 8.86  | 11% | 8.86  | 11% | 0.06  | 1%  | 0%  | 8.79  | 11% |
| 2008 | PA0459000 | PA TARIRATEUA             | 34.36  | 24.90 | 72%  | 9.46  | 28% | 9.46  | 28% | 0.32  | 3%  | 1%  | 9.14  | 27% |
| 2008 | PA0493000 | PA LUIS CARLOS<br>PRESTES | 12.75  | 12.75 | 100% | 0.00  | 0%  | 0.00  | 0%  | 0.00  |     | 0%  | 0.00  | 0%  |
| 2008 | PA0494000 | PA MARIA BONITA           | 13.37  | 12.53 | 94%  | 0.84  | 6%  | 0.84  | 6%  | 0.00  | 0%  | 0%  | 0.84  | 6%  |
| 2008 | RO0172000 | PA FLOR DO<br>AMAZONAS 1  | 107.94 | 31.92 | 30%  | 76.02 | 70% | 76.02 | 70% | 8.31  | 11% | 2%  | 67.71 | 63% |
| 2008 | RO0173000 | PA FLOR DO<br>AMAZONAS 2  | 51.64  | 8.82  | 17%  | 42.83 | 83% | 42.83 | 83% | 7.47  | 17% | 3%  | 35.36 | 68% |
| 2008 | RO0174000 | PA FLOR DO<br>AMAZONAS 3  | 71.00  | 18.97 | 27%  | 52.03 | 73% | 52.03 | 73% | 7.85  | 15% | 3%  | 44.18 | 62% |
| 2008 | RO0175000 | PA NORTE SUL              | 50.65  | 22.87 | 45%  | 27.78 | 55% | 27.78 | 55% | 13.87 | 50% | 10% | 13.91 | 27% |
| 2008 | RO0176000 | PA NORTE SUL I            | 13.29  | 4.61  | 35%  | 8.68  | 65% | 8.68  | 65% | 3.72  | 43% | 9%  | 4.95  | 37% |
| 2008 | RO0177000 | PA PORTO<br>MURTINHO      | 17.14  | 13.14 | 77%  | 4.00  | 23% | 4.00  | 23% | 0.46  | 12% | 2%  | 3.54  | 21% |
| 2008 | RO0178000 | PA FLOR DO<br>AMAZONAS 4  | 58.20  | 18.56 | 32%  | 39.63 | 68% | 39.63 | 68% | 3.89  | 10% | 2%  | 35.74 | 61% |
| 2008 | RO0179000 | PA CAMPO NOVO             | 6.43   | 4.27  | 66%  | 2.15  | 34% | 2.15  | 34% | 0.99  | 46% | 9%  | 1.16  | 18% |
| 2008 | RO0180000 | PA RABO DO<br>TAMANDUÁ    | 39.84  | 30.80 | 77%  | 9.04  | 23% | 9.04  | 23% | 1.01  | 11% | 2%  | 8.04  | 20% |
| 2008 | RO0181000 | PA 13 DE OUTUBRO          | 5.17   | 4.31  | 83%  | 0.86  | 17% | 0.86  | 17% | 0.16  | 18% | 4%  | 0.71  | 14% |
| 2008 | RO0182000 | PA UNIÃO I                | 19.64  | 16.89 | 86%  | 2.75  | 14% | 2.75  | 14% | 0.25  | 9%  | 2%  | 2.50  | 13% |
| 2008 | RO0183000 | PA CALADINHO              | 8.08   | 5.68  | 70%  | 2.40  | 30% | 2.40  | 30% | 0.18  | 7%  | 1%  | 2.22  | 27% |
| 2008 | TO0435000 | PA CANOA                  | 65.97  | 56.44 | 86%  | 9.53  | 14% | 9.53  | 14% | 0.00  | 0%  | 0%  | 9.53  | 14% |

| PAE  |           |                             |        |       |     |        |      |  |        |      |      |    |    |        |      |
|------|-----------|-----------------------------|--------|-------|-----|--------|------|--|--------|------|------|----|----|--------|------|
| 2008 | AC0149000 | TRIUNFO/PORONGAB<br>A       | 244.73 | 15.97 | 7%  | 228.76 | 93%  |  | 228.76 | 93%  | 1.58 | 1% | 0% | 227.19 | 93%  |
| 2008 | AM0132000 | PAE VILA ALTEROSA<br>DO JUI | 507.41 | 18.24 | 4%  | 489.17 | 96%  |  | 489.17 | 96%  | 0.54 | 0% | 0% | 488.63 | 96%  |
| 2008 | AM0133000 | PAE GUARANÍ                 | 98.03  | 19.26 | 20% | 78.78  | 80%  |  | 78.78  | 80%  | 0.47 | 1% | 0% | 78.31  | 80%  |
| 2008 | PA0388000 | PAE COMPLEXO<br>MARACUJÁ    | 7.60   | 0.15  | 2%  | 7.45   | 98%  |  | 7.45   | 98%  | 0.00 | 0% | 0% | 7.45   | 98%  |
| 2008 | PA0436000 | PAE ILHA SANTA<br>MARIA     | 11.28  | 0.00  | 0%  | 11.28  | 100% |  | 11.28  | 100% | 0.00 | 0% | 0% | 11.28  | 100% |
| 2008 | PA0437000 | PAE ILHA<br>MARITUBINHA     | 43.11  | 0.00  | 0%  | 43.11  | 100% |  | 43.11  | 100% | 0.00 | 0% | 0% | 43.11  | 100% |
| 2008 | PA0438000 | PAE ILHA<br>ATATAZINHO      | 19.49  | 0.36  | 2%  | 19.13  | 98%  |  | 19.13  | 98%  | 0.00 | 0% | 0% | 19.13  | 98%  |
| 2008 | PA0439000 | PAE ILHA<br>CAJUUBINHA      | 19.92  | 0.00  | 0%  | 19.92  | 100% |  | 19.92  | 100% | 0.00 | 0% | 0% | 19.92  | 100% |
| 2008 | PA0441000 | PAE ILHA SANTA<br>CATARINA  | 3.95   | 0.00  | 0%  | 3.95   | 100% |  | 3.95   | 100% | 0.00 | 0% | 0% | 3.95   | 100% |
| 2008 | PA0442000 | PAE ILHA<br>TRACUATEUA      | 8.98   | 0.71  | 8%  | 8.26   | 92%  |  | 8.26   | 92%  | 0.00 | 0% | 0% | 8.26   | 92%  |
| 2008 | PA0443000 | PAE ILHA BELA<br>PATRIA     | 4.08   | 0.06  | 1%  | 4.02   | 99%  |  | 4.02   | 99%  | 0.00 | 0% | 0% | 4.02   | 99%  |
| 2008 | PA0444000 | PAE ILHA SÃO<br>RAIMUNDO    | 29.46  | 1.23  | 4%  | 28.23  | 96%  |  | 28.23  | 96%  | 0.26 | 1% | 0% | 27.97  | 95%  |
| 2008 | PA0445000 | PAE ILHA SORVA              | 14.35  | 0.05  | 0%  | 14.30  | 100% |  | 14.30  | 100% | 0.00 | 0% | 0% | 14.30  | 100% |
| 2008 | PA0447000 | PAE ILHA SÃO JOÃO I         | 38.60  | 1.34  | 3%  | 37.25  | 97%  |  | 37.25  | 97%  | 0.30 | 1% | 0% | 36.95  | 96%  |
| 2008 | PA0448000 | PAE ILHA CALHEIRA           | 23.52  | 1.95  | 8%  | 21.57  | 92%  |  | 21.57  | 92%  | 0.00 | 0% | 0% | 21.57  | 92%  |

|      |           |                              |         |       |    |          |      |  |          |      |      |    |    |          |      |
|------|-----------|------------------------------|---------|-------|----|----------|------|--|----------|------|------|----|----|----------|------|
| 2008 | PA0449000 | PAE ILHA MOSSORO             | 7.54    | 0.00  | 0% | 7.54     | 100% |  | 7.54     | 100% | 0.00 | 0% | 0% | 7.54     | 100% |
| 2008 | PA0450000 | PAE ILHA SAMANAJÓS           | 25.70   | 0.04  | 0% | 25.66    | 100% |  | 25.66    | 100% | 0.00 | 0% | 0% | 25.66    | 100% |
| 2008 | PA0451000 | PAE ILHA ARARAS              | 2.59    | 0.00  | 0% | 2.59     | 100% |  | 2.59     | 100% | 0.00 | 0% | 0% | 2.59     | 100% |
| 2008 | PA0452000 | PAE ILHA SAO PEDRO E BARBOSA | 6.88    | 0.07  | 1% | 6.81     | 99%  |  | 6.81     | 99%  | 0.00 | 0% | 0% | 6.81     | 99%  |
| 2008 | PA0453000 | PAE ILHA GRANDE DO LAGUNA    | 1721.86 | 81.71 | 5% | 1,640.15 | 95%  |  | 1,640.15 | 95%  | 2.98 | 0% | 0% | 1,637.18 | 95%  |
| 2008 | PA0454000 | PAE ILHA SANTA MARIA I       | 10.99   | 0.00  | 0% | 10.99    | 100% |  | 10.99    | 100% | 0.00 | 0% | 0% | 10.99    | 100% |
| 2008 | PA0455000 | PAE ILHA MACUJUBIM           | 116.69  | 5.05  | 4% | 111.64   | 96%  |  | 111.64   | 96%  | 0.07 | 0% | 0% | 111.56   | 96%  |
| 2008 | PA0456000 | PAE ILHA ATURIÁ              | 132.05  | 0.41  | 0% | 131.63   | 100% |  | 131.63   | 100% | 0.00 | 0% | 0% | 131.63   | 100% |
| 2008 | PA0457000 | PAE ILHA DOS MACACOS         | 1222.28 | 83.39 | 7% | 1,138.89 | 93%  |  | 1,138.89 | 93%  | 0.23 | 0% | 0% | 1,138.66 | 93%  |
| 2008 | PA0461000 | PAE ILHA CARARUÁ-GRANDE      | 64.33   | 0.19  | 0% | 64.15    | 100% |  | 64.15    | 100% | 0.00 | 0% | 0% | 64.15    | 100% |
| 2008 | PA0462000 | PAE LUZ DA VIDA              | 33.01   | 0.00  | 0% | 33.01    | 100% |  | 33.01    | 100% | 0.00 | 0% | 0% | 33.01    | 100% |
| 2008 | PA0464000 | PAE ILHA JURUPARI            | 43.57   | 1.66  | 4% | 41.91    | 96%  |  | 41.91    | 96%  | 0.00 | 0% | 0% | 41.91    | 96%  |
| 2008 | PA0465000 | PAE ILHA TAQUARI             | 57.84   | 1.30  | 2% | 56.54    | 98%  |  | 56.54    | 98%  | 0.00 | 0% | 0% | 56.54    | 98%  |
| 2008 | PA0466000 | PAE ILHA ITAPERÁ             | 50.69   | 3.08  | 6% | 47.61    | 94%  |  | 47.61    | 94%  | 0.12 | 0% | 0% | 47.50    | 94%  |
| 2008 | PA0467000 | PAE ILHA URUÁ II             | 27.64   | 0.05  | 0% | 27.59    | 100% |  | 27.59    | 100% | 0.00 | 0% | 0% | 27.59    | 100% |
| 2008 | PA0468000 | PAE ILHA SANTA APOLONIA      | 15.61   | 0.59  | 4% | 15.02    | 96%  |  | 15.02    | 96%  | 0.00 | 0% | 0% | 15.02    | 96%  |
| 2008 | PA0469000 | PAE ILHA PANACU              | 38.42   | 0.00  | 0% | 38.42    | 100% |  | 38.42    | 100% | 0.00 | 0% | 0% | 38.42    | 100% |
| 2008 | PA0470000 | PAE ILHA SAPATEIRO           | 2.19    | 0.00  | 0% | 2.19     | 100% |  | 2.19     | 100% | 0.00 | 0% | 0% | 2.19     | 100% |



|      |           |                                        |        |      |    |        |      |        |      |      |    |    |        |      |
|------|-----------|----------------------------------------|--------|------|----|--------|------|--------|------|------|----|----|--------|------|
| 2008 | PA0471000 | PAE SANTA ROSA DO MARACATI             | 29.35  | 0.45 | 2% | 28.90  | 98%  | 28.90  | 98%  | 0.08 | 0% | 0% | 28.82  | 98%  |
| 2008 | PA0472000 | PAE ILHA SANTA MARIA II                | 8.37   | 0.00 | 0% | 8.37   | 100% | 8.37   | 100% | 0.00 | 0% | 0% | 8.37   | 100% |
| 2008 | PA0473000 | PAE ILHA SANTA MARIA III               | 0.68   | 0.00 | 0% | 0.68   | 100% | 0.68   | 100% | 0.00 | 0% | 0% | 0.68   | 100% |
| 2008 | PA0474000 | PAE ILHA MARIANA                       | 2.22   | 0.00 | 0% | 2.22   | 100% | 2.22   | 100% | 0.00 | 0% | 0% | 2.22   | 100% |
| 2008 | PA0475000 | PAE ILHA NOSSA SENHORA DO LIVRAMENTO I | 21.28  | 0.51 | 2% | 20.77  | 98%  | 20.77  | 98%  | 0.00 | 0% | 0% | 20.77  | 98%  |
| 2008 | PA0477000 | PAE ILHA ENTRE-ILHAS                   | 0.23   | 0.00 | 0% | 0.23   | 100% | 0.23   | 100% | 0.00 | 0% | 0% | 0.23   | 100% |
| 2008 | PA0478000 | PAE ILHA JACAREUÁ                      | 4.46   | 0.03 | 1% | 4.43   | 99%  | 4.43   | 99%  | 0.04 | 1% | 0% | 4.39   | 98%  |
| 2008 | PA0479000 | PAE ILHA BIRIBATUBA                    | 2.26   | 0.04 | 2% | 2.22   | 98%  | 2.22   | 98%  | 0.00 | 0% | 0% | 2.22   | 98%  |
| 2008 | PA0480000 | PAE ILHA DO MEIO                       | 257.76 | 0.04 | 0% | 257.72 | 100% | 257.72 | 100% | 0.00 | 0% | 0% | 257.72 | 100% |
| 2008 | PA0481000 | PAE ILHA MARACUJÁ I                    | 215.43 | 0.00 | 0% | 215.43 | 100% | 215.43 | 100% | 0.00 | 0% | 0% | 215.43 | 100% |
| 2008 | PA0482000 | PAE ILHA RASA                          | 24.79  | 0.00 | 0% | 24.79  | 100% | 24.79  | 100% | 0.00 | 0% | 0% | 24.79  | 100% |
| 2008 | PA0483000 | PAE ILHA DO TELES                      | 34.41  | 0.00 | 0% | 34.41  | 100% | 34.41  | 100% | 0.00 | 0% | 0% | 34.41  | 100% |
| 2008 | PA0484000 | PAE ILHA CALDEIRÃO                     | 74.13  | 0.00 | 0% | 74.13  | 100% | 74.13  | 100% | 0.00 | 0% | 0% | 74.13  | 100% |
| 2008 | PA0485000 | PAE ILHA CONCEIÇÃO I                   | 125.80 | 0.84 | 1% | 124.96 | 99%  | 124.96 | 99%  | 0.00 | 0% | 0% | 124.96 | 99%  |
| 2008 | PA0486000 | PAE ILHA SALVADOR                      | 256.75 | 0.02 | 0% | 256.73 | 100% | 256.73 | 100% | 0.00 | 0% | 0% | 256.73 | 100% |
| 2008 | PA0487000 | PAE ILHA QUEIMADA                      | 613.25 | 1.83 | 0% | 611.42 | 100% | 611.42 | 100% | 0.00 | 0% | 0% | 611.42 | 100% |
| 2008 | PA0488000 | PAE ILHA DOS                           | 126.39 | 0.00 | 0% | 126.39 | 100% | 126.39 | 100% | 0.00 | 0% | 0% | 126.39 | 100% |

| CARÁS |           |                             |        |       |     |        |      |        |      |      |    |    |        |      |
|-------|-----------|-----------------------------|--------|-------|-----|--------|------|--------|------|------|----|----|--------|------|
| 2008  | PA0489000 | PAE ILHA PANEMA             | 70.01  | 0.01  | 0%  | 70.00  | 100% | 70.00  | 100% | 0.00 | 0% | 0% | 70.00  | 100% |
| 2008  | PA0490000 | PAE ILHA JURUPARI I         | 297.91 | 5.51  | 2%  | 292.40 | 98%  | 292.40 | 98%  | 0.54 | 0% | 0% | 291.87 | 98%  |
| 2008  | PA0491000 | PAE ILHA BAIANO             | 35.90  | 0.00  | 0%  | 35.90  | 100% | 35.90  | 100% | 0.00 | 0% | 0% | 35.90  | 100% |
| 2008  | PA0492000 | PAE ILHA<br>TRAMBOCA        | 70.19  | 18.66 | 27% | 51.53  | 73%  | 51.53  | 73%  | 0.15 | 0% | 0% | 51.38  | 73%  |
| 2008  | PA0495000 | PAE ILHA PIRARUAIA          | 5.12   | 0.22  | 4%  | 4.90   | 96%  | 4.90   | 96%  | 0.00 | 0% | 0% | 4.90   | 96%  |
| 2008  | PA0496000 | PAE ILHA IOIÁS              | 2.12   | 0.00  | 0%  | 2.12   | 100% | 2.12   | 100% | 0.00 | 0% | 0% | 2.12   | 100% |
| 2008  | PA0497000 | PAE ILHA DO CABO<br>DICO    | 5.37   | 0.00  | 0%  | 5.37   | 100% | 5.37   | 100% | 0.00 | 0% | 0% | 5.37   | 100% |
| 2008  | PA0498000 | PAE TIRIRICA                | 26.29  | 1.99  | 8%  | 24.30  | 92%  | 24.30  | 92%  | 0.17 | 1% | 0% | 24.13  | 92%  |
| 2008  | PA0499000 | PAE ILHA DO BOI             | 24.38  | 0.00  | 0%  | 24.38  | 100% | 24.38  | 100% | 0.00 | 0% | 0% | 24.38  | 100% |
| 2008  | PA0500000 | PAE ILHA JAPIIM<br>SECO     | 20.74  | 0.00  | 0%  | 20.74  | 100% | 20.74  | 100% | 0.00 | 0% | 0% | 20.74  | 100% |
| 2008  | PA0501000 | PAE ILHA<br>MURUMURU I      | 52.39  | 0.80  | 2%  | 51.59  | 98%  | 51.59  | 98%  | 0.00 | 0% | 0% | 51.59  | 98%  |
| 2008  | PA0502000 | PAE ILHA DO<br>TANGARAZINHO | 18.52  | 0.31  | 2%  | 18.21  | 98%  | 18.21  | 98%  | 0.00 | 0% | 0% | 18.21  | 98%  |
| 2008  | PA0503000 | PAE ILHA FURO<br>MUANÁ      | 21.79  | 0.17  | 1%  | 21.62  | 99%  | 21.62  | 99%  | 0.00 | 0% | 0% | 21.62  | 99%  |
| 2008  | PA0504000 | PAE COMPLEXO<br>BATUQUE     | 1.61   | 0.00  | 0%  | 1.61   | 100% | 1.61   | 100% | 0.00 | 0% | 0% | 1.61   | 100% |
| 2008  | AC0147000 | PDS NOVA BAIXA<br>VERDE     | 50.84  | 27.21 | 54% | 23.64  | 46%  | 23.64  | 46%  | 1.07 | 5% | 1% | 22.56  | 44%  |
| 2008  | AM0125000 | PDS COSTA DO<br>CALDEIRÃO   | 20.14  | 3.19  | 16% | 16.95  | 84%  | 16.95  | 84%  | 0.09 | 1% | 0% | 16.86  | 84%  |
| 2008  | AM0126000 | PDS LAGO DO                 | 36.03  | 8.57  | 24% | 27.46  | 76%  | 27.46  | 76%  | 0.46 | 2% | 0% | 27.00  | 75%  |

|      |           |                           |        |        |     |       |     |       |     |      |    |    |       |     |
|------|-----------|---------------------------|--------|--------|-----|-------|-----|-------|-----|------|----|----|-------|-----|
|      |           | TUCUNARÉ                  |        |        |     |       |     |       |     |      |    |    |       |     |
| 2008 | AM0134000 | PDS COSTA DO<br>IRANDUBA  | 16.63  | 1.39   | 8%  | 15.24 | 92% | 15.24 | 92% | 0.39 | 3% | 1% | 14.85 | 89% |
| 2008 | AM0135000 | PDS NOVO REMANSO          | 224.02 | 133.06 | 59% | 90.96 | 41% | 90.96 | 41% | 5.03 | 6% | 1% | 85.94 | 38% |
| 2008 | AM0136000 | PDS AMATARÍ               | 38.54  | 9.65   | 25% | 28.89 | 75% | 28.89 | 75% | 1.03 | 4% | 1% | 27.87 | 72% |
| 2008 | AM0137000 | PDS COSTA DA<br>CONCEIÇÃO | 117.70 | 33.49  | 28% | 84.21 | 72% | 84.21 | 72% | 0.32 | 0% | 0% | 83.89 | 71% |

---

**Table S7** Total area originally forested and area of forest remaining in the year of official creation of each settlement and in two different years (2005 and 2013) and the annual mean area cleared in two periods in Federal Settlement Projects (PA), Sustainable Development Projects (PDS) and Agro-Extractivist Settlement Projects (PAE) created from 2000 to 2008 (total = 899 settlements)

| Year of creation and category | Number analyzed | Total area of forest in km <sup>2</sup> (%) | Remaining forest                                          |                                |                                | Mean clearing per year in km <sup>2</sup> |                                                                          |
|-------------------------------|-----------------|---------------------------------------------|-----------------------------------------------------------|--------------------------------|--------------------------------|-------------------------------------------|--------------------------------------------------------------------------|
|                               |                 |                                             | In the year of settlement creation in km <sup>2</sup> (%) | In 2005 in km <sup>2</sup> (%) | In 2013 in km <sup>2</sup> (%) | From one year after creation to 2005      | From 2006 to 2013 or from one year after creation to 2013 <sup>(1)</sup> |
| <b>2000</b>                   |                 |                                             |                                                           |                                |                                |                                           |                                                                          |
| PA                            | 59              | 4,567.1 (100%)                              | 3,130.0 (69%)                                             | 2,068.5 (45%)                  | 1,633.5 (36%)                  | 212.3                                     | 54.4                                                                     |
| PDS                           | 1               | 484.4 (100%)                                | 483.7 (100%)                                              | 482.1 (100%)                   | 481.2 (99%)                    | 0.3                                       | 0.1                                                                      |
| <b>2001</b>                   |                 |                                             |                                                           |                                |                                |                                           |                                                                          |
| PA                            | 79              | 3,216.1 (100%)                              | 2,136.1 (66%)                                             | 1,657.0 (52%)                  | 1,028.5 (32%)                  | 119.8                                     | 78.6                                                                     |
| PAE                           | 3               | 940.6 (100%)                                | 924.2 (98%)                                               | 917.0 (97%)                    | 907.5 (96%)                    | 1.8                                       | 1.2                                                                      |
| PDS                           | 2               | 614.8 (100%)                                | 593.1 (96%)                                               | 585.2 (95%)                    | 580.2 (94%)                    | 2.0                                       | 0.6                                                                      |
| <b>2002</b>                   |                 |                                             |                                                           |                                |                                |                                           |                                                                          |
| PA                            | 60              | 4,118.2 (100%)                              | 2,168.3 (53%)                                             | 1,623.8 (39%)                  | 1,209.4 (29%)                  | 181.5                                     | 51.8                                                                     |
| PDS                           | 1               | 35.1 (100%)                                 | 27.8 (79%)                                                | 27.8 (79%)                     | 27.3 (78%)                     | 0.0                                       | 0.1                                                                      |
| <b>2003</b>                   |                 |                                             |                                                           |                                |                                |                                           |                                                                          |
| PA                            | 53              | 2,905.0 (100%)                              | 2,222.4 (77%)                                             | 2,089.0 (72%)                  | 1,765.2 (61%)                  | 66.7                                      | 40.5                                                                     |
| PAE                           | 1               | 28.1 (100%)                                 | 11.0 (39%)                                                | 10.8 (39%)                     | 9.8 (35%)                      | 0.1                                       | 0.1                                                                      |
| PDS                           | 2               | 162.8 (100%)                                | 156.2 (96%)                                               | 127.0 (78%)                    | 84.6 (52%)                     | 14.6                                      | 5.3                                                                      |
| <b>2004</b>                   |                 |                                             |                                                           |                                |                                |                                           |                                                                          |
| PA                            | 75              | 3,895.2 (100%)                              | 760.0 (20%)                                               | 667.6 (17%)                    | 425.4 (11%)                    | 92.4                                      | 30.3                                                                     |
| PAE                           | 8               | 11,710.1 (100%)                             | 11,477.7 (98%)                                            | 11,475.0 (98%)                 | 11,445.7 (98%)                 | 2.6                                       | 3.7                                                                      |

|             |     |                    |                   |                  |                   |      |       |
|-------------|-----|--------------------|-------------------|------------------|-------------------|------|-------|
| PDS         | 8   | 1,986.0<br>(100%)  | 1,917.4<br>(97%)  | 1,906.2<br>(96%) | 1,815.9<br>(91%)  | 11.2 | 11.3  |
| <b>2005</b> |     |                    |                   |                  |                   |      |       |
| PA          | 143 | 10,955.9<br>(100%) | 6,313.9<br>(58%)  |                  | 5,286.2<br>(48%)  |      | 128.5 |
| PAE         | 30  | 24,566.9<br>(100%) | 22,685.3<br>(92%) |                  | 22,521.8<br>(92%) |      | 20.4  |
| PDS         | 18  | 11,984.8<br>(100%) | 11,241.0<br>(94%) |                  | 10,674.4<br>(89%) |      | 70.8  |
| <b>2006</b> |     |                    |                   |                  |                   |      |       |
| PA          | 64  | 5,644.6<br>(100%)  | 4,019.0<br>(71%)  |                  | 3,397.2<br>(60%)  |      | 88.8  |
| PAE         | 123 | 12,427.5<br>(100%) | 11,564.3<br>(93%) |                  | 11,466.9<br>(92%) |      | 13.9  |
| PDS         | 29  | 10,940.4<br>(100%) | 10,234.3<br>(94%) |                  | 9,679.5<br>(88%)  |      | 79.3  |
| <b>2007</b> |     |                    |                   |                  |                   |      |       |
| PA          | 26  | 1,418.5<br>(100%)  | 733.0<br>(52%)    |                  | 562.2<br>(40%)    |      | 28.5  |
| PAE         | 10  | 7,667.7<br>(100%)  | 7,601.4<br>(99%)  |                  | 7,580.7<br>(99%)  |      | 3.4   |
| PDS         | 8   | 1,241.7<br>(100%)  | 1,192.9<br>(96%)  |                  | 1,169.2<br>(94%)  |      | 4.0   |
| <b>2008</b> |     |                    |                   |                  |                   |      |       |
| PA          | 25  | 861.5<br>(100%)    | 376.7<br>(44%)    |                  | 320.6<br>(37%)    |      | 11.2  |
| PAE         | 64  | 7,104.3<br>(100%)  | 6,836.0<br>(96%)  |                  | 6,828.5<br>(96%)  |      | 1.5   |
| PDS         | 7   | 503.9<br>(100%)    | 287.4<br>(57%)    |                  | 279.0<br>(55%)    |      | 1.7   |

<sup>(1)</sup>In the case of settlements created between 2006 and 2008, we considered the period from the year of creation through 2013.
